# Supplementary material for: Astrogliosis and neuroinflammation underlie scoliosis upon cilia dysfunction
Source: eLife. 2024 Oct 10;13:RP96831. doi: 10.7554/eLife.96831 (PMC11466456; doi:10.7554/eLife.96831)
Supplement: Supplementary file 3. [file elife-96831-supp3.xlsx]

## Sheet: Direct Foxj1 targets in Trunk
AK7
AK9
ANKEF1
BTBD16
CAPS2
CAPSL
CATIP
CCDC103
CCDC105
CCDC13
CCDC146
CCDC162
CCDC170
CCDC181
CCDC83
CCDC89
CFAP107
CFAP126
CFAP20
CFAP299
CFAP300
CSPP1
CYP27A1
DNAH11
DNAH2
DNAH5
DNAH6
DNAH7
DNAJB13
DYDC2
DZANK1
DZIP1L
EFCAB1
EFCAB6
EFHC1
EFHC2
ENKUR
FHAD1
GATD3
HYDIN
IQCA1
IQUB
KCNJ1
KIF19
KIF6
LRGUK
LRRC9
LRRIQ1
MORN2
MYCBPAP
NME5
NME9
NOTUM
OPN4
PIH1D2
PYY
RAB36
RSPH3
SAXO2
SOCS3
SPAG17
SPAG6
SSX2IP
STPG1
TBATA
TECTA
TEKT1
TEKT4
TEX47
TMEM232
TTC12
TTC29
TTLL9
UBXN11
ZBBX
ZC2HC1C
ZMYND10

## Sheet: Indirect Foxj1 targets
AK8
ARMH1
CCDC40
CCDC65
CCDC87
CFAP161
CFAP206
CFAP276
CFAP74
CFAP77
DAW1
DLEC1
DYNLT1
E2F5
EFHB
ENKD1
ENO4
FAM183A
FAM47E
GOT1L1
IQCG
IQCH
LRRC23
MORN3
PACRG
RIBC1
RNF32
TTLL6
ZMYND12
