# Supplementary material for: Astrogliosis and neuroinflammation underlie scoliosis upon cilia dysfunction
Source: eLife. 2024 Oct 10;13:RP96831. doi: 10.7554/eLife.96831 (PMC11466456; doi:10.7554/eLife.96831)
Supplement: Supplementary file 4. [file elife-96831-supp4.xlsx]

## Sheet: DA result
(Mutant)_vs_(WT)
id	logFC (Mutant)_vs_(WT)	FC	P_Value (Mutant)_vs_(WT)	description	MW	#specific_peptides	gene_name
tr|Q804G9|Q804G9_DANRE	2.86386	7.27959	4.81856e-08	tr|Q804G9|Q804G9_DANRE Annexin OS=Danio rerio OX=7955 GN=anxa2a PE=2 SV=1	38153	25	anxa2a
tr|Q7T3A8|Q7T3A8_DANRE	2.59904	6.05884	9.68556e-06	tr|Q7T3A8|Q7T3A8_DANRE Annexin OS=Danio rerio OX=7955 GN=anxa1a PE=2 SV=1	37754	12	anxa1a
tr|C0SPC7|C0SPC7_DANRE	2.40838	5.30877	0.00319733	tr|C0SPC7|C0SPC7_DANRE Signal transducer and activator of transcription OS=Danio rerio OX=7955 GN=stat3 PE=2 SV=1	92181	14	stat3
tr|Q5TYQ4|Q5TYQ4_DANRE	2.31253	4.96755	1.99214e-06	tr|Q5TYQ4|Q5TYQ4_DANRE Enoyl CoA hydratase domain-containing 2 OS=Danio rerio OX=7955 GN=echdc2 PE=1 SV=1	34349	5	echdc2
tr|Q9PUC4|Q9PUC4_DANRE	1.95649	3.88116	0.00527444	tr|Q9PUC4|Q9PUC4_DANRE Proteasome activator subunit 2 OS=Danio rerio OX=7955 GN=psme2 PE=1 SV=1	27719	9	psme2
tr|B0S5I2|B0S5I2_DANRE	1.91379	3.76797	0.000688624	tr|B0S5I2|B0S5I2_DANRE Novel protein similar to vertebrate complement component 3 (C3) OS=Danio rerio OX=7955 GN=DKEY-75L1.5-001 PE=4 SV=1	178869	11	DKEY-75L1.5-001/C3 like
tr|A0A0R4IPL6|A0A0R4IPL6_DANRE	1.89382	3.71619	0.000112718	tr|A0A0R4IPL6|A0A0R4IPL6_DANRE Calcyphosine-like a OS=Danio rerio OX=7955 GN=capsla PE=1 SV=1	21188	6	capsla
tr|B8JIG4|B8JIG4_DANRE	1.85867	3.62673	0.110108	tr|B8JIG4|B8JIG4_DANRE Ufm1-specific protease 2 OS=Danio rerio OX=7955 GN=ufsp2 PE=1 SV=1	52049	6	ufsp2
tr|L7QIM0|L7QIM0_DANRE	1.85486	3.61717	0.0095483	tr|L7QIM0|L7QIM0_DANRE Pentaxin OS=Danio rerio OX=7955 GN=CRP5.4 PE=2 SV=1	25125	0	CRP5.4
tr|B3DKM3|B3DKM3_DANRE	1.78426	3.44442	0.00148983	tr|B3DKM3|B3DKM3_DANRE Transmembrane emp24 protein transport domain containing 3 OS=Danio rerio OX=7955 GN=tmed3 PE=1 SV=1	23984	3	tmed3
tr|F1Q4X5|F1Q4X5_DANRE	1.76384	3.39601	0.0841738	tr|F1Q4X5|F1Q4X5_DANRE Complement component 4 OS=Danio rerio OX=7955 GN=c4 PE=3 SV=1	191048	25	c4
tr|E7F2T0|E7F2T0_DANRE	1.70812	3.26735	0.0394731	tr|E7F2T0|E7F2T0_DANRE Ciliary rootlet coiled-coil, rootletin family member 2 OS=Danio rerio OX=7955 GN=crocc2 PE=4 SV=1	225976	25	crocc2
tr|F1Q753|F1Q753_DANRE	1.66831	3.17842	0.00545549	tr|F1Q753|F1Q753_DANRE Protein phosphatase 6, regulatory subunit 2b OS=Danio rerio OX=7955 GN=ppp6r2b PE=1 SV=1	96552	21	ppp6r2b
tr|E9QFP3|E9QFP3_DANRE	1.64655	3.13084	0.0411669	tr|E9QFP3|E9QFP3_DANRE Aspartyl-tRNA synthetase 2, mitochondrial OS=Danio rerio OX=7955 GN=dars2 PE=1 SV=2	74315	5	dars2
tr|B0S5X5|B0S5X5_DANRE	1.64166	3.12025	0.0482877	tr|B0S5X5|B0S5X5_DANRE Tyrosine-protein phosphatase non-receptor type OS=Danio rerio OX=7955 GN=ptpn1 PE=3 SV=1	49158	8	ptpn1
tr|L7QIX7|L7QIX7_DANRE	1.64075	3.11828	0.00577673	tr|L7QIX7|L7QIX7_DANRE Pentaxin OS=Danio rerio OX=7955 GN=CRP5.2 PE=2 SV=1	25487	0	CRP5.2
tr|F1QM47|F1QM47_DANRE	1.61988	3.07349	0.000243097	tr|F1QM47|F1QM47_DANRE Complement component 7a (Fragment) OS=Danio rerio OX=7955 GN=c7a PE=3 SV=1	97346	6	c7a
tr|Q6DC49|Q6DC49_DANRE	1.6122	3.05717	0.0243737	tr|Q6DC49|Q6DC49_DANRE Tubulin alpha chain OS=Danio rerio OX=7955 GN=tuba8l3 PE=2 SV=1	50067	0	tuba8l3
tr|Q801M0|Q801M0_DANRE	1.59142	3.01346	0.0229973	tr|Q801M0|Q801M0_DANRE 2-phospho-D-glycerate hydro-lyase (Fragment) OS=Danio rerio OX=7955 GN=eno2 PE=2 SV=1	36851	1	eno2
tr|Q5RHB1|Q5RHB1_DANRE	1.55288	2.93402	0.0980485	tr|Q5RHB1|Q5RHB1_DANRE Calcium channel, voltage-dependent, P/Q type, alpha 1A subunit, a (Fragment) OS=Danio rerio OX=7955 GN=cacna1aa PE=3 SV=1	220784	2	cacna1aa
tr|Q6DHM2|Q6DHM2_DANRE	1.54894	2.92602	0.19928	tr|Q6DHM2|Q6DHM2_DANRE Protein kinase, AMP-activated, beta 1 non-catalytic subunit, a OS=Danio rerio OX=7955 GN=prkab1a PE=1 SV=1	30361	7	prkab1a
tr|A0A140LGB4|A0A140LGB4_DANRE	1.51674	2.86144	0.135098	tr|A0A140LGB4|A0A140LGB4_DANRE Son of sevenless homolog 1 (Drosophila) (Fragment) OS=Danio rerio OX=7955 GN=sos1 PE=1 SV=1	80603	7	sos1
tr|Q3MU73|Q3MU73_DANRE	1.48817	2.80532	0.119566	tr|Q3MU73|Q3MU73_DANRE Complement component C3-2 OS=Danio rerio OX=7955 GN=c3a.3 PE=2 SV=1	184481	5	c3a.3
sp|Q6NX08|WDR12_DANRE	1.47617	2.78209	0.00186884	sp|Q6NX08|WDR12_DANRE Ribosome biogenesis protein wdr12 OS=Danio rerio OX=7955 GN=wdr12 PE=2 SV=1	47281	5	wdr12
tr|F1QIC6|F1QIC6_DANRE	1.46056	2.75215	0.016618	tr|F1QIC6|F1QIC6_DANRE Family with sequence similarity 162 member A OS=Danio rerio OX=7955 GN=fam162a PE=1 SV=1	17870	4	fam162a
tr|B3DFV8|B3DFV8_DANRE	1.44317	2.71917	0.0222215	tr|B3DFV8|B3DFV8_DANRE Cochlin OS=Danio rerio OX=7955 GN=coch PE=1 SV=1	60339	14	coch
tr|A0A2R8Q9V1|A0A2R8Q9V1_DANRE	1.4417	2.7164	0.276212	tr|A0A2R8Q9V1|A0A2R8Q9V1_DANRE Si:dkey-79i2.4 OS=Danio rerio OX=7955 GN=si:dkey-79i2.4 PE=4 SV=1	70864	1	si:dkey-79i2.4
sp|Q7SZQ0|MBOA7_DANRE	1.43451	2.7029	0.0790216	sp|Q7SZQ0|MBOA7_DANRE Lysophospholipid acyltransferase 7 OS=Danio rerio OX=7955 GN=mboat7 PE=2 SV=1	53317	3	mboat7
tr|A0A2R8Q039|A0A2R8Q039_DANRE	1.37588	2.59527	0.00453288	tr|A0A2R8Q039|A0A2R8Q039_DANRE Si:ch211-239f4.1 OS=Danio rerio OX=7955 GN=evi5l PE=4 SV=1	95883	6	evi5l
tr|Q8HWF3|Q8HWF3_DANRE	1.35387	2.55596	0.0860882	tr|Q8HWF3|Q8HWF3_DANRE Major histocompatibility complex class I UFA gene OS=Danio rerio OX=7955 GN=mhc1ufa PE=2 SV=1	39569	7	mhc1ufa
tr|A0A0R4IQQ3|A0A0R4IQQ3_DANRE	1.34724	2.54425	0.00473151	tr|A0A0R4IQQ3|A0A0R4IQQ3_DANRE Centriole, cilia and spindle-associated protein a OS=Danio rerio OX=7955 GN=ccsapa PE=4 SV=1	32221	4	ccsapa
tr|A0A2R8QQS8|A0A2R8QQS8_DANRE	1.34005	2.5316	0.00011315	tr|A0A2R8QQS8|A0A2R8QQS8_DANRE Transgelin OS=Danio rerio OX=7955 GN=tagln2 PE=1 SV=1	24227	7	tagln2
tr|Q5XJC2|Q5XJC2_DANRE	1.33175	2.51707	0.0448138	tr|Q5XJC2|Q5XJC2_DANRE Nudix (nucleoside diphosphate-linked moiety X)-type motif 3b OS=Danio rerio OX=7955 GN=nudt3b PE=2 SV=1	20030	3	nudt3b
tr|B0V1I7|B0V1I7_DANRE	1.31629	2.49025	0.0271219	tr|B0V1I7|B0V1I7_DANRE Heterogeneous nuclear ribonucleoprotein A3 OS=Danio rerio OX=7955 GN=hnrnpa3 PE=1 SV=1	33031	11	hnrnpa3
tr|E9QE29|E9QE29_DANRE	1.31539	2.4887	0.00029106	tr|E9QE29|E9QE29_DANRE Stress-activated protein kinase JNK OS=Danio rerio OX=7955 GN=mapk9 PE=1 SV=1	47920	6	mapk9
sp|Q6PH17|ATAT_DANRE	1.31384	2.48603	0.00990137	sp|Q6PH17|ATAT_DANRE Alpha-tubulin N-acetyltransferase 1 OS=Danio rerio OX=7955 GN=atat1 PE=1 SV=1	33202	6	atat1
tr|Q9PRH9|Q9PRH9_DANRE	1.30397	2.46907	0.0036097	tr|Q9PRH9|Q9PRH9_DANRE Fatty acid-binding protein 2 OS=Danio rerio OX=7955 GN=fabp2 PE=1 SV=1	15060	4	fabp2
tr|F1QAU9|F1QAU9_DANRE	1.30253	2.46661	0.0127859	tr|F1QAU9|F1QAU9_DANRE Desmoplakin b OS=Danio rerio OX=7955 GN=dspb PE=1 SV=2	251066	19	dspb
tr|A8E5C2|A8E5C2_DANRE	1.29664	2.45656	0.000385101	tr|A8E5C2|A8E5C2_DANRE Serpin peptidase inhibitor, clade A (Alpha-1 antiproteinase, antitrypsin), member 7 OS=Danio rerio OX=7955 GN=serpina7 PE=2 SV=1	42964	3	serpina7
tr|A0A2R8PX52|A0A2R8PX52_DANRE	1.29194	2.44856	0.126368	tr|A0A2R8PX52|A0A2R8PX52_DANRE Hephaestin-like 1a OS=Danio rerio OX=7955 GN=hephl1a PE=1 SV=1	127262	3	hephl1a
tr|Q5PRD9|Q5PRD9_DANRE	1.28757	2.44117	0.00445066	tr|Q5PRD9|Q5PRD9_DANRE Zgc:101540 OS=Danio rerio OX=7955 GN=zgc:101540 PE=2 SV=1	69917	18	zgc:101540
tr|A0A286Y9H2|A0A286Y9H2_DANRE	1.28754	2.44111	0.0214761	tr|A0A286Y9H2|A0A286Y9H2_DANRE Myosin Ic, paralog b OS=Danio rerio OX=7955 GN=myo1cb PE=1 SV=2	122741	20	myo1cb
tr|E7F4R5|E7F4R5_DANRE	1.27098	2.41326	0.0523035	tr|E7F4R5|E7F4R5_DANRE Phosphorylase b kinase regulatory subunit OS=Danio rerio OX=7955 GN=hdac8 PE=1 SV=2	136951	9	hdac8
tr|B8JIQ1|B8JIQ1_DANRE	1.26589	2.40475	0.00109597	tr|B8JIQ1|B8JIQ1_DANRE Glycogen synthase kinase-3 beta OS=Danio rerio OX=7955 GN=gsk3bb PE=3 SV=1	46802	4	gsk3bb
tr|A7MCL7|A7MCL7_DANRE	1.26032	2.39548	0.160698	tr|A7MCL7|A7MCL7_DANRE Cystatin 14a, tandem duplicate 2 OS=Danio rerio OX=7955 GN=cst14a.2 PE=1 SV=1	11162	1	cst14a.2
tr|A0A0G2L2U8|A0A0G2L2U8_DANRE	1.25728	2.39045	0.0466836	tr|A0A0G2L2U8|A0A0G2L2U8_DANRE Ig-like domain-containing protein OS=Danio rerio OX=7955 PE=4 SV=2	51443	4	unchar. prot.
tr|Q8JFT6|Q8JFT6_DANRE	1.24783	2.37484	0.0135286	tr|Q8JFT6|Q8JFT6_DANRE SPRY domain-containing protein 7 OS=Danio rerio OX=7955 GN=spryd7a PE=2 SV=1	21553	4	spryd7a
tr|Q6P0V8|Q6P0V8_DANRE	1.24551	2.37103	3.33033e-05	tr|Q6P0V8|Q6P0V8_DANRE Annexin OS=Danio rerio OX=7955 GN=anxa5b PE=1 SV=1	35089	17	anxa5b
tr|Q502T4|Q502T4_DANRE	1.2211	2.33124	0.00563653	tr|Q502T4|Q502T4_DANRE Galectin OS=Danio rerio OX=7955 GN=lgals9l3 PE=2 SV=1	36116	3	lgals9l3
tr|A0A286YB52|A0A286YB52_DANRE	1.20732	2.30908	0.000369118	tr|A0A286YB52|A0A286YB52_DANRE Vav 3 guanine nucleotide exchange factor b OS=Danio rerio OX=7955 GN=vav3b PE=4 SV=1	53100	4	vav3b
tr|A1A5Z8|A1A5Z8_DANRE	1.18891	2.27981	0.0307171	tr|A1A5Z8|A1A5Z8_DANRE S100u protein (Fragment) OS=Danio rerio OX=7955 GN=s100u PE=2 SV=1	29536	6	s100u
tr|A0A2R8QEB2|A0A2R8QEB2_DANRE	1.18405	2.27213	0.0377762	tr|A0A2R8QEB2|A0A2R8QEB2_DANRE Golgin A4 OS=Danio rerio OX=7955 GN=golga4 PE=1 SV=1	247587	18	golga4
sp|Q68FN7|DHSDB_DANRE	1.18267	2.26997	0.0820102	sp|Q68FN7|DHSDB_DANRE Succinate dehydrogenase [ubiquinone] cytochrome b small subunit B, mitochondrial OS=Danio rerio OX=7955 GN=sdhdb PE=2 SV=1	16973	2	sdhdb
tr|F1QPG1|F1QPG1_DANRE	1.17641	2.26013	0.00761323	tr|F1QPG1|F1QPG1_DANRE Lactamase, beta OS=Danio rerio OX=7955 GN=lactb PE=1 SV=1	60313	7	lactb
tr|A0A2R8PZL7|A0A2R8PZL7_DANRE	1.16388	2.2406	0.00943346	tr|A0A2R8PZL7|A0A2R8PZL7_DANRE Calcium homeostasis endoplasmic reticulum protein OS=Danio rerio OX=7955 GN=cherp PE=1 SV=1	101273	4	cherp
tr|E7F646|E7F646_DANRE	1.16375	2.24039	0.00249521	tr|E7F646|E7F646_DANRE Phosphoinositide phospholipase C OS=Danio rerio OX=7955 GN=plcd4b PE=4 SV=1	86218	14	plcd4b
tr|B0S5J3|B0S5J3_DANRE	1.16003	2.23462	0.0425703	tr|B0S5J3|B0S5J3_DANRE U2 snRNP-associated SURP domain-containing OS=Danio rerio OX=7955 GN=u2surp PE=1 SV=1	105105	8	u2surp
tr|F1Q4U5|F1Q4U5_DANRE	1.15311	2.22392	0.0374079	tr|F1Q4U5|F1Q4U5_DANRE 5'-3' exoribonuclease 1 OS=Danio rerio OX=7955 GN=xrn1 PE=1 SV=1	190942	15	xrn1
sp|Q503E1|INT11_DANRE	1.13294	2.19305	0.206682	sp|Q503E1|INT11_DANRE Integrator complex subunit 11 OS=Danio rerio OX=7955 GN=cpsf3l PE=2 SV=1	67592	4	cpsf3l
tr|A1L1V6|A1L1V6_DANRE	1.12678	2.1837	0.0303999	tr|A1L1V6|A1L1V6_DANRE Rab GTPase-binding effector protein 2 OS=Danio rerio OX=7955 GN=rabep2 PE=2 SV=1	53977	5	rabep2
tr|A0A0R4IYV3|A0A0R4IYV3_DANRE	1.11558	2.16683	0.481904	tr|A0A0R4IYV3|A0A0R4IYV3_DANRE Vezatin OS=Danio rerio OX=7955 GN=vezt PE=1 SV=1	87506	4	vezt
tr|Q66HV6|Q66HV6_DANRE	1.10894	2.15687	0.12846	tr|Q66HV6|Q66HV6_DANRE Zgc:92353 OS=Danio rerio OX=7955 GN=macrod1 PE=2 SV=1	27528	8	macrod1
tr|A0A0R4IZA6|A0A0R4IZA6_DANRE	1.10716	2.15422	0.130858	tr|A0A0R4IZA6|A0A0R4IZA6_DANRE Heparan sulfate proteoglycan 2 OS=Danio rerio OX=7955 GN=hspg2 PE=1 SV=1	376856	34	hspg2
sp|Q32PV0|GULP1_DANRE	1.10494	2.15089	0.0182862	sp|Q32PV0|GULP1_DANRE PTB domain-containing engulfment adapter protein 1 OS=Danio rerio OX=7955 GN=gulp1 PE=2 SV=1	33860	5	gulp1
tr|Q6NW47|Q6NW47_DANRE	1.10445	2.15018	0.0346712	tr|Q6NW47|Q6NW47_DANRE Cytoskeleton-associated protein 4 OS=Danio rerio OX=7955 GN=ckap4 PE=1 SV=1	46004	8	ckap4
tr|E9QD37|E9QD37_DANRE	1.09754	2.13989	0.122132	tr|E9QD37|E9QD37_DANRE Ubiquitin-conjugating enzyme E2D 1a OS=Danio rerio OX=7955 GN=ube2d1a PE=3 SV=1	14823	1	ube2d1a
tr|A0A0G2L974|A0A0G2L974_DANRE	1.09593	2.13751	0.00606142	tr|A0A0G2L974|A0A0G2L974_DANRE Filamin B OS=Danio rerio OX=7955 PE=1 SV=2	213799	19	flnb
tr|B0R131|B0R131_DANRE	1.07835	2.11162	0.0369741	tr|B0R131|B0R131_DANRE Novel protein similar to discs large (Dlg) family OS=Danio rerio OX=7955 GN=dlg3 PE=4 SV=1	39713	1	dlg3
tr|A0A2R8QKW1|A0A2R8QKW1_DANRE	1.0753	2.10716	0.0629838	tr|A0A2R8QKW1|A0A2R8QKW1_DANRE Cytochrome c oxidase subunit 7B OS=Danio rerio OX=7955 GN=cox7b PE=1 SV=1	16094	1	cox7b
tr|B8A5V6|B8A5V6_DANRE	1.07309	2.10393	0.0657584	tr|B8A5V6|B8A5V6_DANRE PDZ and LIM domain 1 (elfin) OS=Danio rerio OX=7955 GN=pdlim1 PE=1 SV=1	35189	6	pdli+I85m1
tr|F1Q8J2|F1Q8J2_DANRE	1.07273	2.10341	0.0141164	tr|F1Q8J2|F1Q8J2_DANRE Ubiquitin protein ligase E3 component n-recognin 5 OS=Danio rerio OX=7955 GN=ubr5 PE=1 SV=1	308462	19	ubr5
tr|A0A0R4INM0|A0A0R4INM0_DANRE	1.07161	2.10177	0.00152123	tr|A0A0R4INM0|A0A0R4INM0_DANRE Mannose receptor, C type 1a OS=Danio rerio OX=7955 GN=mrc1a PE=1 SV=1	162967	15	mrc1a
tr|F1R3H1|F1R3H1_DANRE	1.06931	2.09842	0.0482451	tr|F1R3H1|F1R3H1_DANRE Rapunzel 4 OS=Danio rerio OX=7955 GN=rpz4 PE=1 SV=1	44586	5	rpz4
sp|Q6DG43|UBTD2_DANRE	1.06736	2.0956	0.0585463	sp|Q6DG43|UBTD2_DANRE Ubiquitin domain-containing protein 2 OS=Danio rerio OX=7955 GN=ubtd2 PE=2 SV=1	26723	3	ubtd2
tr|B0S7E7|B0S7E7_DANRE	1.0649	2.09203	0.01129	tr|B0S7E7|B0S7E7_DANRE Acyl-CoA synthetase bubblegum family member 2 (Fragment) OS=Danio rerio OX=7955 GN=acsbg2 PE=1 SV=1	87569	10	acsbg2
tr|Q7T2B6|Q7T2B6_DANRE	1.06138	2.08693	0.00681515	tr|Q7T2B6|Q7T2B6_DANRE Acyl-coenzyme A oxidase OS=Danio rerio OX=7955 GN=acox3 PE=2 SV=1	78034	2	acox3
sp|Q1LWV7|MEAK7_DANRE	1.05783	2.08179	0.00587769	sp|Q1LWV7|MEAK7_DANRE MTOR-associated protein MEAK7 OS=Danio rerio OX=7955 GN=meak7 PE=2 SV=1	49949	7	meak7
tr|A0A0R4IHD1|A0A0R4IHD1_DANRE	1.0576	2.08146	0.039371	tr|A0A0R4IHD1|A0A0R4IHD1_DANRE Kinase suppressor of ras 2 OS=Danio rerio OX=7955 GN=ksr2 PE=4 SV=1	108992	13	ksr2
tr|Q6NUY0|Q6NUY0_DANRE	1.05666	2.0801	0.0151167	tr|Q6NUY0|Q6NUY0_DANRE Adenylate kinase 4, mitochondrial OS=Danio rerio OX=7955 GN=ak4 PE=1 SV=1	25441	8	ak4
sp|Q66I24|ASSY_DANRE	1.05638	2.0797	0.19559	sp|Q66I24|ASSY_DANRE Argininosuccinate synthase OS=Danio rerio OX=7955 GN=ass1 PE=2 SV=1	47129	11	ass1
tr|A0A0R4IYB8|A0A0R4IYB8_DANRE	1.05583	2.07892	0.0476989	tr|A0A0R4IYB8|A0A0R4IYB8_DANRE Tyrosine-protein kinase OS=Danio rerio OX=7955 GN=abl2 PE=1 SV=1	127887	7	abl2
tr|E7F371|E7F371_DANRE	1.05433	2.07675	0.00066171	tr|E7F371|E7F371_DANRE Synergin, gamma OS=Danio rerio OX=7955 GN=synrg PE=4 SV=1	151694	7	synrg
tr|F1R044|F1R044_DANRE	1.05394	2.07619	0.057702	tr|F1R044|F1R044_DANRE Mitochondrial ribosomal protein L32 OS=Danio rerio OX=7955 GN=mrpl32 PE=3 SV=1	19927	3	mrpl32
tr|A0PJQ5|A0PJQ5_DANRE	1.05386	2.07607	0.055857	tr|A0PJQ5|A0PJQ5_DANRE RAB36, member RAS oncogene family OS=Danio rerio OX=7955 GN=rab36 PE=1 SV=1	29749	6	rab36
tr|B0R0B4|B0R0B4_DANRE	1.05147	2.07264	0.00868314	tr|B0R0B4|B0R0B4_DANRE Si:dkey-91m11.5 OS=Danio rerio OX=7955 GN=si:dkey-91m11.5 PE=4 SV=1	145880	11	si:dkey-91m11.5
tr|F1R721|F1R721_DANRE	1.04093	2.05756	0.0287077	tr|F1R721|F1R721_DANRE Sidekick cell adhesion molecule 1b (Fragment) OS=Danio rerio OX=7955 GN=sdk1b PE=4 SV=1	229982	6	sdk1b
sp|Q7T322|NAA35_DANRE	1.03848	2.05406	0.0551986	sp|Q7T322|NAA35_DANRE N-alpha-acetyltransferase 35, NatC auxiliary subunit OS=Danio rerio OX=7955 GN=naa35 PE=2 SV=1	83153	1	naa35
tr|F1QV29|F1QV29_DANRE	1.03503	2.04915	0.117897	tr|F1QV29|F1QV29_DANRE Complement C3a, tandem duplicate 2 (Fragment) OS=Danio rerio OX=7955 GN=c3a.2 PE=1 SV=2	185424	1	c3a.2
tr|A0A0R4IS87|A0A0R4IS87_DANRE	1.024	2.03356	0.0566098	tr|A0A0R4IS87|A0A0R4IS87_DANRE ATP-dependent helicase ATRX OS=Danio rerio OX=7955 GN=atrxl PE=3 SV=1	197384	3	atrxl
tr|A0A2R8QQE7|A0A2R8QQE7_DANRE	1.02285	2.03192	0.0249231	tr|A0A2R8QQE7|A0A2R8QQE7_DANRE Kelch repeat and BTB (POZ) domain-containing 3 OS=Danio rerio OX=7955 GN=kbtbd3 PE=4 SV=1	60303	8	kbtbd3
sp|Q5SPD7|P5CR3_DANRE	1.02284	2.03192	0.0200689	sp|Q5SPD7|P5CR3_DANRE Pyrroline-5-carboxylate reductase 3 OS=Danio rerio OX=7955 GN=pycr3 PE=2 SV=1	29922	5	pycr3
sp|F1R2X6|PSM4B_DANRE	1.02194	2.03065	0.0667497	sp|F1R2X6|PSM4B_DANRE Proteasome activator complex subunit 4B OS=Danio rerio OX=7955 GN=psme4b PE=3 SV=2	209069	13	psme4b
tr|A0A2R8Q3B9|A0A2R8Q3B9_DANRE	1.01951	2.02723	0.0367375	tr|A0A2R8Q3B9|A0A2R8Q3B9_DANRE Bromodomain PHD finger transcription factor OS=Danio rerio OX=7955 GN=bptf PE=1 SV=1	311454	18	bptf
tr|Q5BLH5|Q5BLH5_DANRE	1.0162	2.02258	0.105467	tr|Q5BLH5|Q5BLH5_DANRE Calpain 2, (M/II) large subunit a OS=Danio rerio OX=7955 GN=capn2a PE=2 SV=1	78343	1	capn2a
tr|Q6P0G5|Q6P0G5_DANRE	1.01293	2.018	0.233481	tr|Q6P0G5|Q6P0G5_DANRE Tfg protein OS=Danio rerio OX=7955 GN=tfg PE=1 SV=1	42297	2	tfg
tr|F1Q5A9|F1Q5A9_DANRE	1.00968	2.01346	0.0701624	tr|F1Q5A9|F1Q5A9_DANRE Ubiquitination factor E4B, UFD2 homolog (S. cerevisiae) OS=Danio rerio OX=7955 GN=ube4b PE=1 SV=1	134144	17	ube4b
tr|F1QDP4|F1QDP4_DANRE	1.00618	2.00858	0.00102053	tr|F1QDP4|F1QDP4_DANRE Terminal uridylyl transferase 7 OS=Danio rerio OX=7955 GN=tut7 PE=1 SV=2	95178	8	tut7
tr|E9QFH8|E9QFH8_DANRE	1.00214	2.00297	0.0333262	tr|E9QFH8|E9QFH8_DANRE Cold shock domain-containing E1, RNA-binding OS=Danio rerio OX=7955 GN=csde1 PE=1 SV=1	88529	11	csde1
tr|Q6DG79|Q6DG79_DANRE	0.999487	1.99929	0.0336117	tr|Q6DG79|Q6DG79_DANRE Corticotropin-releasing factor-binding protein OS=Danio rerio OX=7955 GN=crhbp PE=2 SV=1	36001	6	crhbp
tr|Q0P4D2|Q0P4D2_DANRE	0.994163	1.99192	0.0741373	tr|Q0P4D2|Q0P4D2_DANRE Fibroblast growth factor OS=Danio rerio OX=7955 GN=fgf12b PE=2 SV=1	21400	4	fgf12b
tr|F1R7W8|F1R7W8_DANRE	0.992383	1.98947	0.0041306	tr|F1R7W8|F1R7W8_DANRE Protein transport protein SEC23 OS=Danio rerio OX=7955 GN=sec23b PE=1 SV=2	84537	9	sec23b
tr|A0AR23|A0AR23_DANRE	0.981848	1.97499	0.0828841	tr|A0AR23|A0AR23_DANRE RING-type E3 ubiquitin transferase OS=Danio rerio OX=7955 GN=mib2 PE=2 SV=1	109475	10	mib2
sp|Q4U2V3|CBPC1_DANRE	0.978705	1.9707	0.0637607	sp|Q4U2V3|CBPC1_DANRE Cytosolic carboxypeptidase 1 OS=Danio rerio OX=7955 GN=agtpbp1 PE=2 SV=1	129792	6	agtpbp1
tr|E7FAI0|E7FAI0_DANRE	0.978126	1.9699	0.0459654	tr|E7FAI0|E7FAI0_DANRE Uncharacterized protein OS=Danio rerio OX=7955 PE=4 SV=3	32565	4	Uncharacterized protein
tr|F1QD64|F1QD64_DANRE	0.97666	1.9679	0.0620673	tr|F1QD64|F1QD64_DANRE Coiled-coil domain-containing 28A OS=Danio rerio OX=7955 GN=ccdc28a PE=4 SV=1	20193	3	ccdc28a
sp|Q06725|N2F1A_DANRE	0.975724	1.96663	0.0588686	sp|Q06725|N2F1A_DANRE Nuclear receptor subfamily 2 group F member 1-A OS=Danio rerio OX=7955 GN=nr2f1a PE=2 SV=1	45482	4	nr2f1a
tr|Q568X4|Q568X4_DANRE	0.975416	1.96621	0.00235225	tr|Q568X4|Q568X4_DANRE WD repeat and FYVE domain containing 2 OS=Danio rerio OX=7955 GN=wdfy2 PE=2 SV=1	45038	8	wdfy2
tr|A0A2R8Q1Y7|A0A2R8Q1Y7_DANRE	0.969793	1.95856	0.0929284	tr|A0A2R8Q1Y7|A0A2R8Q1Y7_DANRE Ecotropic viral integration site 5b OS=Danio rerio OX=7955 GN=evi5b PE=4 SV=1	88471	6	evi5b
tr|Q803H7|Q803H7_DANRE	0.965899	1.95328	0.027907	tr|Q803H7|Q803H7_DANRE Integral membrane protein 2 OS=Danio rerio OX=7955 GN=itm2ba PE=2 SV=1	30512	7	itm2ba
tr|E7EY00|E7EY00_DANRE	0.96456	1.95147	0.0280981	tr|E7EY00|E7EY00_DANRE Si:dkey-16l2.16 OS=Danio rerio OX=7955 GN=si:dkey-16l2.16 PE=4 SV=3	24183	3	si:dkey-16l2.16
tr|A1IH00|A1IH00_DANRE	0.961731	1.94765	0.00393411	tr|A1IH00|A1IH00_DANRE Cis-Golgi matrix protein GM130 OS=Danio rerio OX=7955 GN=golga2 PE=1 SV=1	117774	11	golga2
sp|Q7ZUX3|WIPI4_DANRE	0.958762	1.94364	0.0252307	sp|Q7ZUX3|WIPI4_DANRE WD repeat domain phosphoinositide-interacting protein 4 OS=Danio rerio OX=7955 GN=wdr45 PE=2 SV=1	39641	5	wdr45
tr|Q66HW2|Q66HW2_DANRE	0.958117	1.94277	0.00253596	tr|Q66HW2|Q66HW2_DANRE EH-domain containing 1 OS=Danio rerio OX=7955 GN=ehd1b PE=1 SV=1	60007	12	ehd1b
sp|Q6DRP2|GNL3_DANRE	0.95761	1.94209	0.00932387	sp|Q6DRP2|GNL3_DANRE Guanine nucleotide-binding protein-like 3 OS=Danio rerio OX=7955 GN=gnl3 PE=2 SV=1	62901	3	gnl3
tr|F1R3T4|F1R3T4_DANRE	0.951138	1.9334	0.144027	tr|F1R3T4|F1R3T4_DANRE Galactokinase 1 OS=Danio rerio OX=7955 GN=galk1 PE=1 SV=1	42327	11	galk1
tr|Q503Y0|Q503Y0_DANRE	0.950566	1.93263	0.0320042	tr|Q503Y0|Q503Y0_DANRE Endonuclease OS=Danio rerio OX=7955 GN=endog PE=1 SV=1	34312	2	endog
tr|A0A0R4IVK0|A0A0R4IVK0_DANRE	0.950054	1.93194	0.0139732	tr|A0A0R4IVK0|A0A0R4IVK0_DANRE Discs, large (Drosophila) homolog-associated protein 1b OS=Danio rerio OX=7955 GN=dlgap1b PE=1 SV=2	109869	5	dlgap1b
tr|A0A2R8QK16|A0A2R8QK16_DANRE	0.945025	1.92522	0.0205853	tr|A0A2R8QK16|A0A2R8QK16_DANRE Si:ch73-21k16.5 OS=Danio rerio OX=7955 GN=gnpat2 PE=3 SV=1	74200	8	gnpat2
tr|A0A0R4IHV6|A0A0R4IHV6_DANRE	0.942601	1.92199	0.000572468	tr|A0A0R4IHV6|A0A0R4IHV6_DANRE G protein pathway suppressor 1 OS=Danio rerio OX=7955 GN=gps1 PE=1 SV=2	57619	17	gps1
sp|Q6PE18|P4K2A_DANRE	0.942134	1.92137	0.165906	sp|Q6PE18|P4K2A_DANRE Phosphatidylinositol 4-kinase type 2-alpha OS=Danio rerio OX=7955 GN=pi4k2a PE=2 SV=1	51443	7	pi4k2a
tr|Q6IQX2|Q6IQX2_DANRE	0.940212	1.91881	0.17459	tr|Q6IQX2|Q6IQX2_DANRE Collagen, type I, alpha 2 OS=Danio rerio OX=7955 GN=col1a2 PE=1 SV=1	127210	6	col1a2
tr|B0UYG3|B0UYG3_DANRE	0.935493	1.91254	0.0304188	tr|B0UYG3|B0UYG3_DANRE Cyclin-dependent kinase 16 OS=Danio rerio OX=7955 GN=cdk16 PE=4 SV=1	59170	5	cdk16
tr|A0A0R4IRX7|A0A0R4IRX7_DANRE	0.931969	1.90788	0.0985563	tr|A0A0R4IRX7|A0A0R4IRX7_DANRE Coronin OS=Danio rerio OX=7955 GN=coro2aa PE=3 SV=2	59885	6	coro2aa
tr|A8KB11|A8KB11_DANRE	0.929578	1.90472	0.0912543	tr|A8KB11|A8KB11_DANRE ATP-dependent (S)-NAD(P)H-hydrate dehydratase OS=Danio rerio OX=7955 GN=naxd PE=2 SV=1	46553	1	naxd
tr|Q6P001|Q6P001_DANRE	0.922498	1.89539	0.197394	tr|Q6P001|Q6P001_DANRE Dehydrogenase/reductase (SDR family) member 13-like 1 OS=Danio rerio OX=7955 GN=dhrs13l1 PE=1 SV=1	34742	6	dhrs13l1
tr|Q7ZVA4|Q7ZVA4_DANRE	0.922302	1.89514	0.0406701	tr|Q7ZVA4|Q7ZVA4_DANRE Protein S100 OS=Danio rerio OX=7955 GN=s100a10b PE=1 SV=1	11157	3	s100a10b
sp|Q5XJ34|KC15L_DANRE	0.921997	1.89474	0.0250474	sp|Q5XJ34|KC15L_DANRE BTB/POZ domain-containing protein kctd15-like OS=Danio rerio OX=7955 GN=kctd15l PE=1 SV=1	29364	2	kctd15l
sp|A0AUR5|MINY3_DANRE	0.918566	1.89024	0.0358484	sp|A0AUR5|MINY3_DANRE Ubiquitin carboxyl-terminal hydrolase MINDY-3 OS=Danio rerio OX=7955 GN=mindy3 PE=2 SV=1	50111	3	mindy3
sp|Q6PBJ2|CFA20_DANRE	0.918337	1.88994	0.0673834	sp|Q6PBJ2|CFA20_DANRE Cilia- and flagella-associated protein 20 OS=Danio rerio OX=7955 GN=cfap20 PE=2 SV=1	22606	4	cfap20
tr|E7F3M2|E7F3M2_DANRE	0.915997	1.88687	0.0693715	tr|E7F3M2|E7F3M2_DANRE Cyclin and CBS domain divalent metal cation transport mediator 3 OS=Danio rerio OX=7955 GN=cnnm3 PE=1 SV=2	81543	10	cnnm3
tr|Q6PH71|Q6PH71_DANRE	0.915746	1.88654	0.0403804	tr|Q6PH71|Q6PH71_DANRE Ceramidase OS=Danio rerio OX=7955 GN=asah1b PE=2 SV=1	44681	5	asah1b
sp|Q4V9P3|R7BPB_DANRE	0.912993	1.88295	0.0218212	sp|Q4V9P3|R7BPB_DANRE Regulator of G-protein signaling 7-binding protein B OS=Danio rerio OX=7955 GN=rgs7bpb PE=2 SV=1	28455	3	rgs7bpb
sp|Q8JH68|MXA_DANRE	0.912173	1.88188	0.0101821	sp|Q8JH68|MXA_DANRE Interferon-induced GTP-binding protein MxA OS=Danio rerio OX=7955 GN=mxa PE=2 SV=1	73262	3	mxa
tr|F1R1P6|F1R1P6_DANRE	0.909818	1.87881	0.107753	tr|F1R1P6|F1R1P6_DANRE N-acetylneuraminic acid synthase a OS=Danio rerio OX=7955 GN=nansa PE=1 SV=2	40151	1	nansa
tr|B3DJJ9|B3DJJ9_DANRE	0.906403	1.87437	0.00501844	tr|B3DJJ9|B3DJJ9_DANRE Prnprs3 protein OS=Danio rerio OX=7955 GN=prnprs3 PE=2 SV=1	58811	11	prnprs3
tr|A0A0R4IZ59|A0A0R4IZ59_DANRE	0.900224	1.86636	0.0111845	tr|A0A0R4IZ59|A0A0R4IZ59_DANRE Si:ch211-194b1.1 OS=Danio rerio OX=7955 GN=si:ch211-194b1.1 PE=4 SV=1	219414	5	si:ch211-194b1.1
tr|A0A2R8RVS1|A0A2R8RVS1_DANRE	0.899724	1.86571	0.0462152	tr|A0A2R8RVS1|A0A2R8RVS1_DANRE Nuclear autoantigenic sperm protein (histone-binding) OS=Danio rerio OX=7955 GN=nasp PE=1 SV=1	67775	7	nasp
sp|B0UYF2|S7A14_DANRE	0.896041	1.86095	0.208345	sp|B0UYF2|S7A14_DANRE Probable cationic amino acid transporter OS=Danio rerio OX=7955 GN=slc7a14a PE=3 SV=1	84887	5	slc7a14a
tr|F1Q5A4|F1Q5A4_DANRE	0.894968	1.85957	0.0339931	tr|F1Q5A4|F1Q5A4_DANRE TBC1 domain family, member 17 OS=Danio rerio OX=7955 GN=tbc1d17 PE=1 SV=1	66681	8	tbc1d17
sp|Q6DGM3|RM15_DANRE	0.893775	1.85803	0.0202405	sp|Q6DGM3|RM15_DANRE 39S ribosomal protein L15, mitochondrial OS=Danio rerio OX=7955 GN=mrpl15 PE=2 SV=1	33392	6	mrpl15
tr|A0A2R8PXX3|A0A2R8PXX3_DANRE	0.89064	1.854	0.0288268	tr|A0A2R8PXX3|A0A2R8PXX3_DANRE LETM1 domain-containing 1 OS=Danio rerio OX=7955 GN=letmd1 PE=1 SV=1	42380	7	letmd1
tr|Q6NZR9|Q6NZR9_DANRE	0.889755	1.85286	0.155617	tr|Q6NZR9|Q6NZR9_DANRE NudC domain containing 3 OS=Danio rerio OX=7955 GN=nudcd3 PE=2 SV=1	38488	12	nudcd3
tr|A0A0G2KKE8|A0A0G2KKE8_DANRE	0.888667	1.85146	0.079587	tr|A0A0G2KKE8|A0A0G2KKE8_DANRE SH3 domain-containing protein OS=Danio rerio OX=7955 PE=4 SV=1	72727	8	Uncharacterized protein
tr|A6P4B8|A6P4B8_DANRE	0.881884	1.84278	0.0687104	tr|A6P4B8|A6P4B8_DANRE Ryanodine receptor 1 OS=Danio rerio OX=7955 GN=ryr1b PE=2 SV=1	574755	3	ryr1b
tr|A2BIE9|A2BIE9_DANRE	0.88028	1.84073	0.0729915	tr|A2BIE9|A2BIE9_DANRE Quinoid dihydropteridine reductase b1 OS=Danio rerio OX=7955 GN=qdprb.1 PE=1 SV=1	25221	9	qdprb.1
sp|Q8JIR0|BMI1A_DANRE	0.879687	1.83998	0.0379277	sp|Q8JIR0|BMI1A_DANRE Polycomb complex protein BMI-1-A OS=Danio rerio OX=7955 GN=bmi1a PE=1 SV=2	36539	3	bmi1a
tr|A8WI00|A8WI00_DANRE	0.875262	1.83434	0.111339	tr|A8WI00|A8WI00_DANRE Signal transducing adaptor molecule (SH3 domain and ITAM motif) 2 OS=Danio rerio OX=7955 GN=stam2 PE=1 SV=1	55647	9	stam2
tr|F1RBH5|F1RBH5_DANRE	0.873458	1.83205	0.0263447	tr|F1RBH5|F1RBH5_DANRE Component of oligomeric Golgi complex 7 OS=Danio rerio OX=7955 GN=cog7 PE=1 SV=3	82524	4	cog7
tr|E7F078|E7F078_DANRE	0.870008	1.82767	0.21617	tr|E7F078|E7F078_DANRE Family with sequence similarity 171 member A2a OS=Danio rerio OX=7955 GN=fam171a2a PE=3 SV=1	91950	9	fam171a2a
tr|A0A2R8Q7C3|A0A2R8Q7C3_DANRE	0.867843	1.82493	0.0617314	tr|A0A2R8Q7C3|A0A2R8Q7C3_DANRE Calcium/calmodulin-dependent protein kinase Ia OS=Danio rerio OX=7955 GN=camk1a PE=3 SV=1	43743	8	camk1a
tr|F1QZ50|F1QZ50_DANRE	0.866175	1.82282	0.021434	tr|F1QZ50|F1QZ50_DANRE AHNAK nucleoprotein OS=Danio rerio OX=7955 GN=ahnak PE=1 SV=2	685166	84	ahnak
tr|Q5XJS7|Q5XJS7_DANRE	0.857073	1.81136	0.0723614	tr|Q5XJS7|Q5XJS7_DANRE 2-deoxy-D-ribose 5-phosphate aldolase OS=Danio rerio OX=7955 GN=dera PE=2 SV=1	35038	1	dera
tr|A0A0R4IBD8|A0A0R4IBD8_DANRE	0.85551	1.8094	0.00250875	tr|A0A0R4IBD8|A0A0R4IBD8_DANRE E3 ubiquitin-protein ligase OS=Danio rerio OX=7955 GN=itchb PE=1 SV=1	96455	3	itchb
tr|U3JAA9|U3JAA9_DANRE	0.855087	1.80887	0.00829539	tr|U3JAA9|U3JAA9_DANRE Eukaryotic translation elongation factor 1 delta b (guanine nucleotide exchange protein) (Fragment) OS=Danio rerio OX=7955 GN=eef1db PE=1 SV=8	25553	5	eef1db
tr|F1QKE3|F1QKE3_DANRE	0.854188	1.80774	0.014073	tr|F1QKE3|F1QKE3_DANRE Membrane protein, palmitoylated 6a (MAGUK p55 subfamily member 6) OS=Danio rerio OX=7955 GN=pals2a PE=1 SV=2	61652	5	pals2a
tr|A5WV31|A5WV31_DANRE	0.853811	1.80727	0.162608	tr|A5WV31|A5WV31_DANRE ATCAY kinesin light chain-interacting caytaxin a OS=Danio rerio OX=7955 GN=atcaya PE=4 SV=2	41460	4	atcaya
tr|A0A2R8QIT4|A0A2R8QIT4_DANRE	0.852812	1.80602	0.0325705	tr|A0A2R8QIT4|A0A2R8QIT4_DANRE Proteasome activator subunit 1 OS=Danio rerio OX=7955 GN=psme1 PE=1 SV=1	27676	9	psme1
tr|E7F4J8|E7F4J8_DANRE	0.852093	1.80512	0.0832138	tr|E7F4J8|E7F4J8_DANRE Transducin beta-like 2 OS=Danio rerio OX=7955 GN=tbl2 PE=1 SV=1	49034	7	tbl2
tr|A0A2R8Q9T1|A0A2R8Q9T1_DANRE	0.851581	1.80448	0.080198	tr|A0A2R8Q9T1|A0A2R8Q9T1_DANRE Thymocyte selection-associated high mobility group box OS=Danio rerio OX=7955 GN=tox PE=1 SV=1	58462	2	tox
tr|E7EZX6|E7EZX6_DANRE	0.845167	1.79647	0.126776	tr|E7EZX6|E7EZX6_DANRE Glycosylphosphatidylinositol anchor attachment 1 OS=Danio rerio OX=7955 GN=gpaa1 PE=1 SV=1	68304	6	gpaa1
tr|A0A0R4IIN9|A0A0R4IIN9_DANRE	0.844697	1.79589	0.122112	tr|A0A0R4IIN9|A0A0R4IIN9_DANRE Leucyl/cystinyl aminopeptidase OS=Danio rerio OX=7955 GN=lnpep PE=1 SV=1	116079	13	lnpep
tr|B2CZC1|B2CZC1_DANRE	0.843963	1.79497	0.18725	tr|B2CZC1|B2CZC1_DANRE Calcium-transporting ATPase OS=Danio rerio OX=7955 GN=atp2b4 PE=2 SV=1	129733	1	atp2b4
tr|Q1LV04|Q1LV04_DANRE	0.842735	1.79345	0.00537954	tr|Q1LV04|Q1LV04_DANRE Si:dkey-102f14.5 OS=Danio rerio OX=7955 GN=phaf1 PE=3 SV=1	47742	1	phaf1
tr|X1WBT0|X1WBT0_DANRE	0.842484	1.79313	0.0798211	tr|X1WBT0|X1WBT0_DANRE Si:dkey-105h12.2 OS=Danio rerio OX=7955 GN=si:dkey-105h12.2 PE=1 SV=1	160165	5	si:dkey-105h12.2
tr|F1QVT8|F1QVT8_DANRE	0.842374	1.793	0.0530189	tr|F1QVT8|F1QVT8_DANRE Choline-specific glycerophosphodiester phosphodiesterase OS=Danio rerio OX=7955 GN=enpp6 PE=1 SV=2	52854	10	enpp6
tr|Q1L8P8|Q1L8P8_DANRE	0.840366	1.7905	0.0126737	tr|Q1L8P8|Q1L8P8_DANRE Metaxin OS=Danio rerio OX=7955 GN=mtx1b PE=1 SV=1	35907	5	mtx1b
sp|Q6DHI5|SIR5_DANRE	0.838866	1.78864	0.0386091	sp|Q6DHI5|SIR5_DANRE NAD-dependent protein deacylase sirtuin-5, mitochondrial OS=Danio rerio OX=7955 GN=sirt5 PE=1 SV=1	33929	7	sirt5
tr|E7FE34|E7FE34_DANRE	0.836853	1.78615	0.07165	tr|E7FE34|E7FE34_DANRE Un-named hu7912 OS=Danio rerio OX=7955 GN=unm_hu7912 PE=4 SV=1	120499	13	unm_hu7912
tr|A0A286YA49|A0A286YA49_DANRE	0.83682	1.78611	0.0334894	tr|A0A286YA49|A0A286YA49_DANRE Mitogen-activated protein kinase kinase 7 OS=Danio rerio OX=7955 GN=map2k7 PE=1 SV=2	51177	3	map2k7
tr|B0S5D2|B0S5D2_DANRE	0.834142	1.7828	0.1222	tr|B0S5D2|B0S5D2_DANRE GLE1 RNA export mediator OS=Danio rerio OX=7955 GN=gle1 PE=1 SV=1	81038	5	gle1
tr|A0A0R4IGM8|A0A0R4IGM8_DANRE	0.832382	1.78062	0.125978	tr|A0A0R4IGM8|A0A0R4IGM8_DANRE MIA SH3 domain ER export factor 3 OS=Danio rerio OX=7955 GN=mia3 PE=1 SV=1	207361	8	mia3
tr|F1R543|F1R543_DANRE	0.822863	1.76891	0.0215842	tr|F1R543|F1R543_DANRE Wu:fb30f12 OS=Danio rerio OX=7955 GN=wu:fb30f12 PE=1 SV=1	123088	5	wu:fb30f12
tr|E7FGR3|E7FGR3_DANRE	0.822203	1.7681	0.00298918	tr|E7FGR3|E7FGR3_DANRE Exocyst complex component OS=Danio rerio OX=7955 GN=exoc6 PE=1 SV=2	92770	16	exoc6
tr|A0A0R4IQG1|A0A0R4IQG1_DANRE	0.817235	1.76203	0.300316	tr|A0A0R4IQG1|A0A0R4IQG1_DANRE 3-hydroxy-3-methylglutaryl coenzyme A synthase OS=Danio rerio OX=7955 GN=hmgcs1 PE=1 SV=1	57009	1	hmgcs1
sp|Q803E0|PALD_DANRE	0.816675	1.76134	0.312112	sp|Q803E0|PALD_DANRE Paladin OS=Danio rerio OX=7955 GN=pald1 PE=2 SV=1	98885	4	pald1
tr|A0A0N5E8A1|A0A0N5E8A1_DANRE	0.815859	1.76035	0.0228783	tr|A0A0N5E8A1|A0A0N5E8A1_DANRE Phospholipid phosphatase 4 OS=Danio rerio OX=7955 GN=plpp4 PE=3 SV=2	29473	2	plpp4
tr|A2CEW6|A2CEW6_DANRE	0.814706	1.75894	0.00623256	tr|A2CEW6|A2CEW6_DANRE Serine/threonine kinase 16 OS=Danio rerio OX=7955 GN=stk16 PE=4 SV=1	34884	3	stk16
tr|A0A0R4IFK2|A0A0R4IFK2_DANRE	0.814646	1.75887	0.00504997	tr|A0A0R4IFK2|A0A0R4IFK2_DANRE Amyloid beta (A4) precursor-like protein 1 (Fragment) OS=Danio rerio OX=7955 GN=aplp1 PE=3 SV=1	80291	9	aplp1
tr|F1QGX1|F1QGX1_DANRE	0.812174	1.75586	0.143106	tr|F1QGX1|F1QGX1_DANRE Dachsous cadherin-related 1b OS=Danio rerio OX=7955 GN=dchs1b PE=4 SV=2	357287	19	dchs1b
tr|E7F569|E7F569_DANRE	0.812115	1.75578	0.0649627	tr|E7F569|E7F569_DANRE Si:ch211-153b23.5 OS=Danio rerio OX=7955 GN=si:ch211-153b23.5 PE=1 SV=1	24118	5	si:ch211-153b23.5
tr|A0JMJ1|A0JMJ1_DANRE	0.809943	1.75314	0.0331976	tr|A0JMJ1|A0JMJ1_DANRE Actin-depolymerizing factor OS=Danio rerio OX=7955 GN=scinla PE=2 SV=2	80016	19	scinla
tr|A0A0R4IRC6|A0A0R4IRC6_DANRE	0.808848	1.75181	0.0106135	tr|A0A0R4IRC6|A0A0R4IRC6_DANRE FAT atypical cadherin 1a OS=Danio rerio OX=7955 GN=fat1a PE=1 SV=2	506278	16	fat1a
tr|A0A0G2KVE1|A0A0G2KVE1_DANRE	0.808824	1.75178	0.0255921	tr|A0A0G2KVE1|A0A0G2KVE1_DANRE RAS guanyl-releasing protein 2-like OS=Danio rerio OX=7955 GN=LOC797658 PE=4 SV=2	59952	7	LOC797658
tr|A0A0R4IBN1|A0A0R4IBN1_DANRE	0.808313	1.75116	0.0184224	tr|A0A0R4IBN1|A0A0R4IBN1_DANRE Syndecan OS=Danio rerio OX=7955 PE=3 SV=2	47602	4	Uncharacterized protein
tr|E7FC91|E7FC91_DANRE	0.806922	1.74947	0.0720852	tr|E7FC91|E7FC91_DANRE Ankyrin repeat domain 44 OS=Danio rerio OX=7955 GN=ankrd44 PE=1 SV=2	114174	7	ankrd44
tr|A0A0R4IHX2|A0A0R4IHX2_DANRE	0.804915	1.74704	0.0762619	tr|A0A0R4IHX2|A0A0R4IHX2_DANRE Kelch domain-containing 4 OS=Danio rerio OX=7955 GN=klhdc4 PE=1 SV=1	65998	6	klhdc4
tr|A0A0R4ICC6|A0A0R4ICC6_DANRE	0.803122	1.74487	0.0252925	tr|A0A0R4ICC6|A0A0R4ICC6_DANRE Diphosphomevalonate decarboxylase OS=Danio rerio OX=7955 GN=mvda PE=1 SV=2	44649	10	mvda
tr|E7F1Q7|E7F1Q7_DANRE	0.803015	1.74474	0.0429548	tr|E7F1Q7|E7F1Q7_DANRE Zinc finger Ran-binding domain-containing protein 2 OS=Danio rerio OX=7955 GN=zranb2 PE=1 SV=2	34994	3	zranb2
sp|Q9DGJ3|NPC2_DANRE	0.800277	1.74144	0.081588	sp|Q9DGJ3|NPC2_DANRE NPC intracellular cholesterol transporter 2 OS=Danio rerio OX=7955 GN=npc2 PE=2 SV=1	16306	5	npc2
tr|A0A2R8Q8J6|A0A2R8Q8J6_DANRE	0.798618	1.73943	0.0101722	tr|A0A2R8Q8J6|A0A2R8Q8J6_DANRE Mitochondrial import inner membrane translocase subunit TIM50 OS=Danio rerio OX=7955 GN=timm50 PE=1 SV=1	43132	4	timm50
tr|A0A2R8Q0G4|A0A2R8Q0G4_DANRE	0.797749	1.73839	0.0237834	tr|A0A2R8Q0G4|A0A2R8Q0G4_DANRE Glutathione hydrolase OS=Danio rerio OX=7955 GN=ggt7 PE=1 SV=1	61511	6	ggt7
tr|Q08BC5|Q08BC5_DANRE	0.796749	1.73718	0.0690433	tr|Q08BC5|Q08BC5_DANRE 3-keto-steroid reductase OS=Danio rerio OX=7955 GN=hsd17b7 PE=2 SV=1	38305	5	hsd17b7
tr|E7F0V6|E7F0V6_DANRE	0.796392	1.73675	0.0347548	tr|E7F0V6|E7F0V6_DANRE E3 ubiquitin-protein ligase RNF31 OS=Danio rerio OX=7955 GN=LOC100334178 PE=3 SV=2	109124	5	LOC100334178
tr|A0A0G2L2B8|A0A0G2L2B8_DANRE	0.79548	1.73565	0.0106178	tr|A0A0G2L2B8|A0A0G2L2B8_DANRE Receptor protein-tyrosine kinase OS=Danio rerio OX=7955 GN=pdgfrb PE=3 SV=2	119648	5	pdgfrb
tr|A0A2R8QHW2|A0A2R8QHW2_DANRE	0.794884	1.73494	0.0526781	tr|A0A2R8QHW2|A0A2R8QHW2_DANRE Phosphatidylinositol-binding clathrin assembly protein a OS=Danio rerio OX=7955 GN=picalma PE=1 SV=1	77782	3	picalma
tr|B0S7I0|B0S7I0_DANRE	0.793561	1.73335	0.0763723	tr|B0S7I0|B0S7I0_DANRE Patatin-like phospholipase domain-containing 7b OS=Danio rerio OX=7955 GN=pnpla7b PE=3 SV=1	144527	6	pnpla7b
tr|Q6DHP7|Q6DHP7_DANRE	0.793025	1.7327	0.143006	tr|Q6DHP7|Q6DHP7_DANRE Guanylate-binding protein 1 OS=Danio rerio OX=7955 GN=gbp1 PE=1 SV=1	71173	6	gbp1
tr|Q6PC37|Q6PC37_DANRE	0.791761	1.73119	0.0698908	tr|Q6PC37|Q6PC37_DANRE Nucleoside diphosphate kinase OS=Danio rerio OX=7955 GN=nme2a PE=1 SV=1	17215	4	nme2a
tr|A0A0R4IYB7|A0A0R4IYB7_DANRE	0.790528	1.72971	0.0349465	tr|A0A0R4IYB7|A0A0R4IYB7_DANRE N-alpha-acetyltransferase 25, NatB auxiliary subunit OS=Danio rerio OX=7955 GN=naa25 PE=1 SV=1	111666	12	naa25
tr|Q2VRP7|Q2VRP7_DANRE	0.788774	1.72761	0.108883	tr|Q2VRP7|Q2VRP7_DANRE Transporter OS=Danio rerio OX=7955 GN=slc6a6b PE=2 SV=1	69898	5	slc6a6b
tr|T1ECU9|T1ECU9_DANRE	0.788641	1.72745	0.183676	tr|T1ECU9|T1ECU9_DANRE Glutamate receptor, ionotropic, delta 2 (Grid2)-interacting protein, b OS=Danio rerio OX=7955 GN=grid2ipb PE=4 SV=1	152496	11	grid2ipb
tr|B0S7L9|B0S7L9_DANRE	0.788192	1.72691	0.11594	tr|B0S7L9|B0S7L9_DANRE Kinesin family member 1Ab OS=Danio rerio OX=7955 GN=kif1ab PE=4 SV=1	202332	11	kif1ab
tr|X1WC44|X1WC44_DANRE	0.788079	1.72677	0.0627154	tr|X1WC44|X1WC44_DANRE Si:ch211-212c13.8 (Fragment) OS=Danio rerio OX=7955 GN=si:ch211-212c13.8 PE=1 SV=1	125410	8	si:ch211-212c13.8
tr|B6EUL6|B6EUL6_DANRE	0.78738	1.72594	0.0210723	tr|B6EUL6|B6EUL6_DANRE Neuroligin 1 OS=Danio rerio OX=7955 GN=nlgn1 PE=2 SV=1	95427	4	nlgn1
tr|A0A0R4IBS3|A0A0R4IBS3_DANRE	0.785991	1.72428	0.0795543	tr|A0A0R4IBS3|A0A0R4IBS3_DANRE Target of myb1 membrane-trafficking protein (Fragment) OS=Danio rerio OX=7955 GN=tom1 PE=1 SV=1	43135	5	tom1
tr|Q498V7|Q498V7_DANRE	0.78502	1.72312	0.00011655	tr|Q498V7|Q498V7_DANRE O-phosphoserine phosphohydrolase OS=Danio rerio OX=7955 GN=psph PE=2 SV=1	24937	5	psph
tr|Q7T3B8|Q7T3B8_DANRE	0.784457	1.72244	0.126015	tr|Q7T3B8|Q7T3B8_DANRE N-terminal amino-acid N(alpha)-acetyltransferase NatA OS=Danio rerio OX=7955 GN=naa10 PE=1 SV=1	25228	9	naa10
tr|A0A2R8RX84|A0A2R8RX84_DANRE	0.784023	1.72193	0.0847867	tr|A0A2R8RX84|A0A2R8RX84_DANRE Atlastin 3 OS=Danio rerio OX=7955 GN=atl3 PE=1 SV=1	58699	1	atl3
tr|A5WVS2|A5WVS2_DANRE	0.781628	1.71907	0.0111588	tr|A5WVS2|A5WVS2_DANRE Non-specific serine/threonine protein kinase OS=Danio rerio OX=7955 GN=pak2b PE=1 SV=1	59515	4	pak2b
sp|Q4U0S5|PAF1_DANRE	0.779864	1.71697	0.151153	sp|Q4U0S5|PAF1_DANRE RNA polymerase II-associated factor 1 homolog OS=Danio rerio OX=7955 GN=paf1 PE=1 SV=1	58216	8	paf1
tr|A0A0R4IH96|A0A0R4IH96_DANRE	0.779169	1.71614	0.145031	tr|A0A0R4IH96|A0A0R4IH96_DANRE Beta-carotene oxygenase 1 OS=Danio rerio OX=7955 GN=bco1 PE=1 SV=1	64204	4	bco1
tr|B0S6V7|B0S6V7_DANRE	0.778905	1.71583	0.0515286	tr|B0S6V7|B0S6V7_DANRE Phosphatidylinositol 3-kinase 85 kDa regulatory subunit alpha OS=Danio rerio OX=7955 GN=pik3r1 PE=1 SV=1	83708	7	pik3r1
tr|A0A2R8Q5A9|A0A2R8Q5A9_DANRE	0.777496	1.71415	0.326299	tr|A0A2R8Q5A9|A0A2R8Q5A9_DANRE Complement component 6 OS=Danio rerio OX=7955 GN=c6 PE=1 SV=1	101234	8	c6
tr|A0A2R8Q3A1|A0A2R8Q3A1_DANRE	0.776512	1.71298	0.199831	tr|A0A2R8Q3A1|A0A2R8Q3A1_DANRE Palmitoyltransferase OS=Danio rerio OX=7955 GN=zdhhc5a PE=3 SV=1	79547	6	zdhhc5a
tr|F1RAE9|F1RAE9_DANRE	0.775352	1.71161	0.358001	tr|F1RAE9|F1RAE9_DANRE Syntaxin-binding protein 2 OS=Danio rerio OX=7955 GN=stxbp2 PE=1 SV=1	67140	4	stxbp2
tr|F1Q9F0|F1Q9F0_DANRE	0.774724	1.71086	0.010215	tr|F1Q9F0|F1Q9F0_DANRE Band 4.1-like protein 5 OS=Danio rerio OX=7955 GN=epb41l5 PE=1 SV=1	85740	7	epb41l5
tr|A0A0G2KXJ0|A0A0G2KXJ0_DANRE	0.774071	1.71009	0.056153	tr|A0A0G2KXJ0|A0A0G2KXJ0_DANRE DmX-like protein 1 OS=Danio rerio OX=7955 GN=LOC100333625 PE=4 SV=1	214304	7	LOC100333625
sp|Q5RIW8|MED23_DANRE	0.772447	1.70817	0.152737	sp|Q5RIW8|MED23_DANRE Mediator of RNA polymerase II transcription subunit 23 OS=Danio rerio OX=7955 GN=med23 PE=2 SV=2	156882	9	med23
sp|Q6TV19|DICER_DANRE	0.770704	1.7061	0.110247	sp|Q6TV19|DICER_DANRE Endoribonuclease Dicer OS=Danio rerio OX=7955 GN=dicer1 PE=2 SV=2	210817	6	dicer1
tr|E7EZR3|E7EZR3_DANRE	0.769711	1.70493	0.173595	tr|E7EZR3|E7EZR3_DANRE Phosphatidylinositol transfer protein, beta OS=Danio rerio OX=7955 GN=pitpnb PE=1 SV=3	31739	6	pitpnb
tr|F1QNG4|F1QNG4_DANRE	0.769488	1.70466	0.0516465	tr|F1QNG4|F1QNG4_DANRE HRas proto-oncogene, GTPase a OS=Danio rerio OX=7955 GN=hrasa PE=4 SV=1	21443	2	hrasa
tr|A0A2R8PZS5|A0A2R8PZS5_DANRE	0.769221	1.70435	0.0155965	tr|A0A2R8PZS5|A0A2R8PZS5_DANRE Transcription activation suppressor b OS=Danio rerio OX=7955 GN=tasorb PE=3 SV=1	200851	5	tasorb
sp|Q9PTE6|TPST1_DANRE	0.766497	1.70113	0.0942954	sp|Q9PTE6|TPST1_DANRE Protein-tyrosine sulfotransferase 1 OS=Danio rerio OX=7955 GN=tpst1 PE=2 SV=2	40198	5	tpst1
tr|F1QVE4|F1QVE4_DANRE	0.753236	1.68557	0.00379498	tr|F1QVE4|F1QVE4_DANRE Eukaryotic translation elongation factor 1 epsilon 1 OS=Danio rerio OX=7955 GN=eef1e1 PE=1 SV=2	19924	5	eef1e1
tr|A0A286YBG3|A0A286YBG3_DANRE	0.75135	1.68337	0.104919	tr|A0A286YBG3|A0A286YBG3_DANRE 55 kDa erythrocyte membrane protein OS=Danio rerio OX=7955 GN=mpp1 PE=3 SV=1	52198	6	mpp1
sp|Q5SPC5|OTOF_DANRE	0.748906	1.68052	0.0901425	sp|Q5SPC5|OTOF_DANRE Otoferlin OS=Danio rerio OX=7955 GN=otof PE=3 SV=1	226228	6	otof
sp|Q6NY73|L3BPB_DANRE	0.747634	1.67904	0.217505	sp|Q6NY73|L3BPB_DANRE Galectin-3-binding protein B OS=Danio rerio OX=7955 GN=lgals3bpb PE=2 SV=1	64901	10	lgals3bpb
tr|O93598|O93598_DANRE	0.747559	1.67895	0.147597	tr|O93598|O93598_DANRE Signal transducer and activator of transcription OS=Danio rerio OX=7955 GN=stat1a PE=2 SV=1	86857	14	stat1a
tr|F1Q8M3|F1Q8M3_DANRE	0.743997	1.67481	0.102779	tr|F1Q8M3|F1Q8M3_DANRE ADP-ribosylation factor-interacting protein 1 (arfaptin 1) OS=Danio rerio OX=7955 GN=arfip1 PE=1 SV=1	50217	4	arfip1
tr|F1Q6Z9|F1Q6Z9_DANRE	0.743741	1.67451	0.00286243	tr|F1Q6Z9|F1Q6Z9_DANRE Glucosidase, alpha; neutral AB OS=Danio rerio OX=7955 GN=ganabb PE=1 SV=3	106892	19	ganabb
tr|B1H1L9|B1H1L9_DANRE	0.743729	1.6745	0.0524323	tr|B1H1L9|B1H1L9_DANRE S-phase cyclin A-associated protein in the ER OS=Danio rerio OX=7955 GN=scaper PE=2 SV=1	149523	9	scaper
tr|Q1LYN4|Q1LYN4_DANRE	0.740395	1.67063	0.0348771	tr|Q1LYN4|Q1LYN4_DANRE [Tau protein] kinase OS=Danio rerio OX=7955 GN=gsk3aa PE=3 SV=2	50840	7	gsk3aa
tr|F1QYH5|F1QYH5_DANRE	0.740036	1.67022	0.134936	tr|F1QYH5|F1QYH5_DANRE Zw10 kinetochore protein OS=Danio rerio OX=7955 GN=zw10 PE=1 SV=1	87304	7	zw10
sp|Q5XJX1|SEGN_DANRE	0.73926	1.66932	0.192199	sp|Q5XJX1|SEGN_DANRE Secretagogin OS=Danio rerio OX=7955 GN=scgn PE=1 SV=1	31578	8	scgn
tr|E7F1C9|E7F1C9_DANRE	0.73811	1.66799	0.351465	tr|E7F1C9|E7F1C9_DANRE Zmp:0000000529 OS=Danio rerio OX=7955 GN=zmp:0000000529 PE=4 SV=2	73462	8	zmp:0000000529
tr|Q6PCS7|Q6PCS7_DANRE	0.737479	1.66726	0.0471333	tr|Q6PCS7|Q6PCS7_DANRE Protein kinase, AMP-activated, gamma 1 non-catalytic subunit OS=Danio rerio OX=7955 GN=prkag1 PE=1 SV=1	37298	10	prkag1
tr|X1WCE5|X1WCE5_DANRE	0.737051	1.66677	0.0272362	tr|X1WCE5|X1WCE5_DANRE Alpha-mannosidase OS=Danio rerio OX=7955 GN=man2c1 PE=1 SV=1	116419	9	man2c1
tr|A0A0G2KKU4|A0A0G2KKU4_DANRE	0.736576	1.66622	0.0739951	tr|A0A0G2KKU4|A0A0G2KKU4_DANRE Uncharacterized protein OS=Danio rerio OX=7955 PE=4 SV=2	36558	1	Uncharacterized protein
sp|Q6NWE1|PHF10_DANRE	0.736065	1.66563	0.0866825	sp|Q6NWE1|PHF10_DANRE PHD finger protein 10 OS=Danio rerio OX=7955 GN=phf10 PE=2 SV=2	55184	3	phf10
tr|A0A0G2KJA6|A0A0G2KJA6_DANRE	0.732784	1.66184	0.0498811	tr|A0A0G2KJA6|A0A0G2KJA6_DANRE Na(+)/H(+) exchange regulatory cofactor NHE-RF OS=Danio rerio OX=7955 GN=slc9a3r1b PE=1 SV=2	41269	2	slc9a3r1b
tr|Q6PHE4|Q6PHE4_DANRE	0.732264	1.66124	0.194865	tr|Q6PHE4|Q6PHE4_DANRE Zgc:77517 OS=Danio rerio OX=7955 GN=krt18b PE=2 SV=1	44771	2	krt18b
sp|Q5U3W0|CPPED_DANRE	0.731382	1.66023	0.0550425	sp|Q5U3W0|CPPED_DANRE Serine/threonine-protein phosphatase CPPED1 OS=Danio rerio OX=7955 GN=cpped1 PE=2 SV=1	35050	3	cpped1
tr|E7FE68|E7FE68_DANRE	0.731329	1.66017	0.0844057	tr|E7FE68|E7FE68_DANRE Stathmin OS=Danio rerio OX=7955 GN=stmn2a PE=3 SV=1	20783	3	stmn2a
tr|A0A0G2KHN8|A0A0G2KHN8_DANRE	0.730031	1.65868	0.0866587	tr|A0A0G2KHN8|A0A0G2KHN8_DANRE Ubiquitin conjugating enzyme E2 O OS=Danio rerio OX=7955 GN=ube2o PE=1 SV=1	103344	12	ube2o
tr|A0A286Y8C7|A0A286Y8C7_DANRE	0.728772	1.65723	0.0584303	tr|A0A286Y8C7|A0A286Y8C7_DANRE Synaptic vesicle glycoprotein 2Ca OS=Danio rerio OX=7955 GN=sv2ca PE=3 SV=1	82124	5	sv2ca
tr|A1L2G2|A1L2G2_DANRE	0.728713	1.65716	0.102749	tr|A1L2G2|A1L2G2_DANRE Zgc:158869 OS=Danio rerio OX=7955 GN=dachd PE=2 SV=1	65731	3	dachd
tr|F1QU24|F1QU24_DANRE	0.728656	1.65709	0.0364912	tr|F1QU24|F1QU24_DANRE ADAM metallopeptidase domain 9 OS=Danio rerio OX=7955 GN=adam9 PE=4 SV=1	90284	7	adam9
tr|E7F8R6|E7F8R6_DANRE	0.727862	1.65618	0.0762991	tr|E7F8R6|E7F8R6_DANRE Tripartite motif-containing 46a (Fragment) OS=Danio rerio OX=7955 GN=trim46a PE=4 SV=1	85924	9	trim46a
tr|Q7ZU93|Q7ZU93_DANRE	0.724385	1.6522	0.0531019	tr|Q7ZU93|Q7ZU93_DANRE Ribonucloprotein OS=Danio rerio OX=7955 GN=snu13a PE=1 SV=1	13974	1	snu13a
sp|Q6NYY9|VMP1_DANRE	0.723644	1.65135	0.131783	sp|Q6NYY9|VMP1_DANRE Vacuole membrane protein 1 OS=Danio rerio OX=7955 GN=vmp1 PE=2 SV=1	45705	2	vmp1
tr|Q7T369|Q7T369_DANRE	0.723509	1.65119	0.108545	tr|Q7T369|Q7T369_DANRE WBP2 N-terminal-like OS=Danio rerio OX=7955 GN=wbp2nl PE=1 SV=1	27459	5	wbp2nl
sp|Q1L987|ATPF1_DANRE	0.723383	1.65105	0.0695426	sp|Q1L987|ATPF1_DANRE ATP synthase mitochondrial F1 complex assembly factor 1 OS=Danio rerio OX=7955 GN=atpaf1 PE=2 SV=2	34671	4	atpaf1
tr|F1R1N9|F1R1N9_DANRE	0.721354	1.64873	0.143278	tr|F1R1N9|F1R1N9_DANRE CD2-associated protein OS=Danio rerio OX=7955 GN=cd2ap PE=1 SV=1	72807	8	cd2ap
tr|A0A2R8QJF6|A0A2R8QJF6_DANRE	0.720043	1.64723	0.025086	tr|A0A2R8QJF6|A0A2R8QJF6_DANRE Un-named hu7910 OS=Danio rerio OX=7955 GN=unm_hu7910 PE=1 SV=1	67754	6	unm_hu7910
tr|E7FF25|E7FF25_DANRE	0.719973	1.64715	0.172827	tr|E7FF25|E7FF25_DANRE Zgc:85722 OS=Danio rerio OX=7955 GN=fam184aa PE=4 SV=2	124166	10	fam184aa
sp|Q7ZVK4|VPS36_DANRE	0.717411	1.64423	0.0156253	sp|Q7ZVK4|VPS36_DANRE Vacuolar protein-sorting-associated protein 36 OS=Danio rerio OX=7955 GN=vps36 PE=2 SV=1	43281	5	vps36
tr|B8JKW4|B8JKW4_DANRE	0.716901	1.64365	0.0446027	tr|B8JKW4|B8JKW4_DANRE Complement C3a, tandem duplicate 1 OS=Danio rerio OX=7955 GN=c3a.1 PE=1 SV=1	183234	32	c3a.1
tr|E9QHD6|E9QHD6_DANRE	0.716706	1.64343	0.284184	tr|E9QHD6|E9QHD6_DANRE Serine/arginine-rich splicing factor 2 OS=Danio rerio OX=7955 GN=srsf2a PE=1 SV=1	20082	4	srsf2a
sp|A5WVX0|ITPA_DANRE	0.716589	1.64329	0.210016	sp|A5WVX0|ITPA_DANRE Inosine triphosphate pyrophosphatase OS=Danio rerio OX=7955 GN=itpa PE=2 SV=1	22869	7	itpa
tr|A0A0R4IG30|A0A0R4IG30_DANRE	0.716267	1.64292	0.0791983	tr|A0A0R4IG30|A0A0R4IG30_DANRE Delta/notch-like EGF repeat-containing OS=Danio rerio OX=7955 GN=dner PE=4 SV=1	80143	5	dner
tr|A8E7G8|A8E7G8_DANRE	0.714436	1.64084	0.0887165	tr|A8E7G8|A8E7G8_DANRE Transmembrane 9 superfamily member OS=Danio rerio OX=7955 GN=tm9sf3 PE=1 SV=1	67758	6	tm9sf3
tr|Q98TT9|Q98TT9_DANRE	0.713885	1.64022	0.0322657	tr|Q98TT9|Q98TT9_DANRE GDNF family receptor alpha OS=Danio rerio OX=7955 GN=gfra1a PE=1 SV=2	52742	2	gfra1a
sp|Q7ZWE3|LARP7_DANRE	0.712676	1.63884	0.177875	sp|Q7ZWE3|LARP7_DANRE La-related protein 7 OS=Danio rerio OX=7955 GN=larp7 PE=2 SV=1	64063	5	larp7
tr|Q8JGR8|Q8JGR8_DANRE	0.711647	1.63767	0.0146316	tr|Q8JGR8|Q8JGR8_DANRE Lysosome membrane protein II OS=Danio rerio OX=7955 GN=scarb2a PE=1 SV=1	60234	10	scarb2a
tr|A0A0R4IVJ5|A0A0R4IVJ5_DANRE	0.710322	1.63617	0.148882	tr|A0A0R4IVJ5|A0A0R4IVJ5_DANRE Mitogen-activated protein kinase kinase kinase 7 OS=Danio rerio OX=7955 GN=map3k7 PE=1 SV=1	64882	5	map3k7
sp|F1QGH6|AMER2_DANRE	0.710157	1.63598	0.0248479	sp|F1QGH6|AMER2_DANRE APC membrane recruitment protein 2 OS=Danio rerio OX=7955 GN=amer2 PE=2 SV=1	69090	3	amer2
tr|A0A0R4IML3|A0A0R4IML3_DANRE	0.708716	1.63435	0.0901941	tr|A0A0R4IML3|A0A0R4IML3_DANRE Dystrobrevin OS=Danio rerio OX=7955 GN=dtnbb PE=3 SV=2	64407	9	dtnbb
tr|Q1L8B2|Q1L8B2_DANRE	0.706975	1.63238	0.022377	tr|Q1L8B2|Q1L8B2_DANRE Tripartite motif-containing 46b OS=Danio rerio OX=7955 GN=trim46b PE=4 SV=1	82462	10	trim46b
tr|A0A2R8PXN0|A0A2R8PXN0_DANRE	0.706609	1.63196	0.224316	tr|A0A2R8PXN0|A0A2R8PXN0_DANRE Hexokinase OS=Danio rerio OX=7955 GN=hk2 PE=1 SV=1	98685	5	hk2
tr|A2VCZ7|A2VCZ7_DANRE	0.703039	1.62793	0.0268314	tr|A2VCZ7|A2VCZ7_DANRE E3 ubiquitin-protein ligase OS=Danio rerio OX=7955 GN=wwp2 PE=1 SV=1	98308	8	wwp2
sp|Q7ZVE6|PLGT2_DANRE	0.702379	1.62719	0.202235	sp|Q7ZVE6|PLGT2_DANRE Protein O-glucosyltransferase 2 OS=Danio rerio OX=7955 GN=poglut2 PE=2 SV=1	57802	6	poglut2
tr|A0A0R4ILH2|A0A0R4ILH2_DANRE	0.700883	1.6255	0.193149	tr|A0A0R4ILH2|A0A0R4ILH2_DANRE Epoxide hydrolase 4 OS=Danio rerio OX=7955 GN=ephx4 PE=4 SV=1	42853	5	ephx4
tr|F1Q4Y0|F1Q4Y0_DANRE	0.700641	1.62523	0.040251	tr|F1Q4Y0|F1Q4Y0_DANRE Rho guanine nucleotide exchange factor (GEF) 1b OS=Danio rerio OX=7955 GN=arhgef1b PE=1 SV=1	113499	13	arhgef1b
tr|E7F8G4|E7F8G4_DANRE	0.700344	1.62489	0.0356546	tr|E7F8G4|E7F8G4_DANRE Phosphoinositide phospholipase C OS=Danio rerio OX=7955 GN=si:ch211-210g13.5 PE=4 SV=2	114110	4	si:ch211-210g13.5
tr|A0A0G2L2D6|A0A0G2L2D6_DANRE	0.698463	1.62278	0.0766505	tr|A0A0G2L2D6|A0A0G2L2D6_DANRE Cadherin-10-like OS=Danio rerio OX=7955 GN=LOC100534755 PE=4 SV=2	68285	5	LOC100534755
tr|Q567D3|Q567D3_DANRE	0.695172	1.61908	0.186828	tr|Q567D3|Q567D3_DANRE Zgc:112143 OS=Danio rerio OX=7955 GN=steap4 PE=2 SV=1	52128	5	steap4
sp|Q6P0H6|CSN4_DANRE	0.693584	1.6173	0.11621	sp|Q6P0H6|CSN4_DANRE COP9 signalosome complex subunit 4 OS=Danio rerio OX=7955 GN=cops4 PE=2 SV=1	46346	1	cops4
tr|A0A0R4IJS6|A0A0R4IJS6_DANRE	0.691118	1.61453	0.0285895	tr|A0A0R4IJS6|A0A0R4IJS6_DANRE KH domain containing, RNA binding, signal transduction associated 3 OS=Danio rerio OX=7955 GN=khdrbs3 PE=4 SV=2	32790	3	khdrbs3
tr|X1WEK5|X1WEK5_DANRE	0.690692	1.61406	0.258295	tr|X1WEK5|X1WEK5_DANRE V-rel avian reticuloendotheliosis viral oncogene homolog B OS=Danio rerio OX=7955 GN=relb PE=4 SV=1	65373	6	relb
tr|A3KNL3|A3KNL3_DANRE	0.688631	1.61175	0.107149	tr|A3KNL3|A3KNL3_DANRE Choline-phosphate cytidylyltransferase OS=Danio rerio OX=7955 GN=pcyt1ba PE=1 SV=1	39461	10	pcyt1ba
tr|E7EZW5|E7EZW5_DANRE	0.68795	1.61099	0.0196507	tr|E7EZW5|E7EZW5_DANRE Guanylate cyclase OS=Danio rerio OX=7955 GN=gucy1a1 PE=2 SV=1	75390	3	gucy1a1
tr|Q503C4|Q503C4_DANRE	0.686258	1.6091	0.27285	tr|Q503C4|Q503C4_DANRE Non-specific serine/threonine protein kinase OS=Danio rerio OX=7955 GN=csnk1g2a PE=1 SV=1	47579	3	csnk1g2a
sp|Q9IBD0|CELF1_DANRE	0.685709	1.60849	0.0750364	sp|Q9IBD0|CELF1_DANRE CUGBP Elav-like family member 1 OS=Danio rerio OX=7955 GN=celf1 PE=1 SV=1	53608	8	celf1
tr|B0V2U7|B0V2U7_DANRE	0.682466	1.60488	0.168527	tr|B0V2U7|B0V2U7_DANRE Histamine N-methyltransferase OS=Danio rerio OX=7955 GN=hnmt PE=1 SV=1	38064	6	hnmt
tr|F1QMR6|F1QMR6_DANRE	0.682376	1.60478	0.110082	tr|F1QMR6|F1QMR6_DANRE NCK-interacting protein with SH3 domain OS=Danio rerio OX=7955 GN=nckipsd PE=1 SV=2	82851	8	nckipsd
tr|X1WF27|X1WF27_DANRE	0.681679	1.604	0.123745	tr|X1WF27|X1WF27_DANRE Si:ch211-121j5.4 (Fragment) OS=Danio rerio OX=7955 GN=cracdla PE=4 SV=1	108318	6	cracdla
tr|E7FCP7|E7FCP7_DANRE	0.680659	1.60287	0.12847	tr|E7FCP7|E7FCP7_DANRE Si:ch73-12o23.1 OS=Danio rerio OX=7955 GN=gaa2 PE=1 SV=1	107970	8	gaa2
tr|F1R8N2|F1R8N2_DANRE	0.680651	1.60286	0.184153	tr|F1R8N2|F1R8N2_DANRE Sb:cb37 (Fragment) OS=Danio rerio OX=7955 GN=sb:cb37 PE=1 SV=2	160335	2	sb:cb37
tr|E7EYU5|E7EYU5_DANRE	0.680379	1.60256	0.00397063	tr|E7EYU5|E7EYU5_DANRE Low density lipoprotein receptor class A domain-containing 2 OS=Danio rerio OX=7955 GN=ldlrad2 PE=4 SV=1	41099	2	ldlrad2
tr|R4GDQ8|R4GDQ8_DANRE	0.679877	1.602	0.167151	tr|R4GDQ8|R4GDQ8_DANRE Si:ch211-255p10.4 OS=Danio rerio OX=7955 GN=brsk1a PE=4 SV=1	93121	5	brsk1a
tr|Q6DRD5|Q6DRD5_DANRE	0.679464	1.60154	0.123775	tr|Q6DRD5|Q6DRD5_DANRE Ubiquitin fusion degradation 1-like OS=Danio rerio OX=7955 GN=ufd1l PE=1 SV=1	35000	8	ufd1l
sp|Q5RGQ2|ANM8B_DANRE	0.678844	1.60086	0.0328016	sp|Q5RGQ2|ANM8B_DANRE Protein arginine N-methyltransferase 8-B OS=Danio rerio OX=7955 GN=prmt8b PE=2 SV=2	48222	5	prmt8b
tr|A0A2R8Q4V0|A0A2R8Q4V0_DANRE	0.677974	1.59989	0.0280107	tr|A0A2R8Q4V0|A0A2R8Q4V0_DANRE Amyloid beta (A4) precursor-like protein 2 OS=Danio rerio OX=7955 GN=aplp2 PE=3 SV=1	87939	6	aplp2
sp|Q6DHK1|NNRE_DANRE	0.676697	1.59848	0.19961	sp|Q6DHK1|NNRE_DANRE NAD(P)H-hydrate epimerase OS=Danio rerio OX=7955 GN=naxe PE=1 SV=1	30882	6	naxe
tr|Q7ZUG4|Q7ZUG4_DANRE	0.676127	1.59784	0.00560136	tr|Q7ZUG4|Q7ZUG4_DANRE RAB5A, member RAS oncogene family like OS=Danio rerio OX=7955 GN=rab5ab PE=1 SV=1	23500	2	rab5ab
tr|Q6P267|Q6P267_DANRE	0.675865	1.59755	0.0384323	tr|Q6P267|Q6P267_DANRE UBX domain protein 4 OS=Danio rerio OX=7955 GN=ubxn4 PE=2 SV=1	56013	6	ubxn4
tr|F1QRZ2|F1QRZ2_DANRE	0.674955	1.59655	0.205591	tr|F1QRZ2|F1QRZ2_DANRE Transmembrane protein 245 (Fragment) OS=Danio rerio OX=7955 GN=tmem245 PE=3 SV=1	47941	3	tmem245
tr|A0A0B5JW32|A0A0B5JW32_DANRE	0.673567	1.59501	0.0512856	tr|A0A0B5JW32|A0A0B5JW32_DANRE Ptn (Fragment) OS=Danio rerio OX=7955 GN=ptn PE=1 SV=1	17515	2	ptn
tr|Q6DBR3|Q6DBR3_DANRE	0.67339	1.59482	0.215657	tr|Q6DBR3|Q6DBR3_DANRE ADP-ribosylarginine hydrolase OS=Danio rerio OX=7955 GN=adprh PE=1 SV=1	38772	10	adprh
tr|F1QWG2|F1QWG2_DANRE	0.673255	1.59467	0.0717096	tr|F1QWG2|F1QWG2_DANRE Zgc:112332 OS=Danio rerio OX=7955 GN=zgc:112332 PE=3 SV=1	33160	8	zgc:112332
sp|Q6PFM4|LNPB_DANRE	0.672086	1.59338	0.0706436	sp|Q6PFM4|LNPB_DANRE Endoplasmic reticulum junction formation protein lunapark-B OS=Danio rerio OX=7955 GN=lnpkb PE=2 SV=2	45219	6	lnpkb
tr|F1RE76|F1RE76_DANRE	0.670858	1.59202	0.18744	tr|F1RE76|F1RE76_DANRE Sodium channel protein OS=Danio rerio OX=7955 GN=scn8ab PE=3 SV=1	222523	7	scn8ab
tr|B6VCA2|B6VCA2_DANRE	0.670817	1.59197	0.261032	tr|B6VCA2|B6VCA2_DANRE Prohormone convertase 2 OS=Danio rerio OX=7955 GN=pcsk2 PE=2 SV=1	71779	5	pcsk2
tr|D7REL4|D7REL4_DANRE	0.669116	1.5901	0.0311551	tr|D7REL4|D7REL4_DANRE Eukaryotic translation initiation factor 4E class I third member OS=Danio rerio OX=7955 GN=eif4e1c PE=2 SV=1	24550	8	eif4e1c
tr|A0A0G2KQ55|A0A0G2KQ55_DANRE	0.668639	1.58957	0.196203	tr|A0A0G2KQ55|A0A0G2KQ55_DANRE Rab11 family-interacting protein 5-like OS=Danio rerio OX=7955 GN=LOC570939 PE=4 SV=2	67128	5	LOC570939
tr|X1WCY9|X1WCY9_DANRE	0.666914	1.58767	0.0696745	tr|X1WCY9|X1WCY9_DANRE Si:ch73-44m9.3 OS=Danio rerio OX=7955 GN=si:ch73-44m9.3 PE=4 SV=3	33620	7	si:ch73-44m9.3
tr|A0JMJ9|A0JMJ9_DANRE	0.666573	1.5873	0.203073	tr|A0JMJ9|A0JMJ9_DANRE Hlcs protein (Fragment) OS=Danio rerio OX=7955 GN=hlcs PE=2 SV=1	91194	9	hlcs
tr|Q1L8T7|Q1L8T7_DANRE	0.665882	1.58654	0.0993308	tr|Q1L8T7|Q1L8T7_DANRE Discs, large (Drosophila) homolog-associated protein 3 OS=Danio rerio OX=7955 GN=dlgap3 PE=3 SV=1	116152	8	dlgap3
tr|Q4KME1|Q4KME1_DANRE	0.665495	1.58611	0.094233	tr|Q4KME1|Q4KME1_DANRE RAB24, member RAS oncogene family OS=Danio rerio OX=7955 GN=rab24 PE=1 SV=1	22834	5	rab24
tr|A0A0R4IK07|A0A0R4IK07_DANRE	0.663582	1.58401	0.120704	tr|A0A0R4IK07|A0A0R4IK07_DANRE Si:ch211-208k15.1 OS=Danio rerio OX=7955 GN=tsnare1 PE=3 SV=1	32051	4	tsnare1
tr|Q4V9N9|Q4V9N9_DANRE	0.662078	1.58236	0.175439	tr|Q4V9N9|Q4V9N9_DANRE Eukaryotic translation initiation factor 4C OS=Danio rerio OX=7955 GN=eif1axb PE=1 SV=1	16474	6	eif1axb
tr|F1QWU6|F1QWU6_DANRE	0.658076	1.57798	0.281281	tr|F1QWU6|F1QWU6_DANRE Dehydrogenase/reductase SDR family member 7B OS=Danio rerio OX=7955 GN=dhrs7b PE=1 SV=1	34219	7	dhrs7b
tr|A9JT16|A9JT16_DANRE	0.657522	1.57737	0.263684	tr|A9JT16|A9JT16_DANRE Pfdn5 protein OS=Danio rerio OX=7955 GN=pfdn5 PE=1 SV=1	17185	9	pfdn5
sp|A1A5V9|ELP5_DANRE	0.657505	1.57735	0.0046483	sp|A1A5V9|ELP5_DANRE Elongator complex protein 5 OS=Danio rerio OX=7955 GN=elp5 PE=2 SV=1	32739	2	elp5
tr|Q6TLE5|Q6TLE5_DANRE	0.656047	1.57576	0.191248	tr|Q6TLE5|Q6TLE5_DANRE Family with sequence similarity 49 member Ba OS=Danio rerio OX=7955 GN=fam49ba PE=1 SV=1	37075	7	fam49ba
tr|A0A2R8QI13|A0A2R8QI13_DANRE	0.655226	1.57486	0.00664085	tr|A0A2R8QI13|A0A2R8QI13_DANRE Protein arginine methyltransferase 3 OS=Danio rerio OX=7955 GN=prmt3 PE=1 SV=1	56390	11	prmt3
sp|Q4VBI2|IR3IP_DANRE	0.655202	1.57484	0.441928	sp|Q4VBI2|IR3IP_DANRE Immediate early response 3-interacting protein 1 OS=Danio rerio OX=7955 GN=ier3ip1 PE=3 SV=1	8886	2	ier3ip1
sp|Q6IQP3|CALUA_DANRE	0.654318	1.57387	0.296799	sp|Q6IQP3|CALUA_DANRE Calumenin-A OS=Danio rerio OX=7955 GN=calua PE=2 SV=1	37141	7	calua
tr|F1QNT8|F1QNT8_DANRE	0.653	1.57243	0.0179724	tr|F1QNT8|F1QNT8_DANRE Calcium-binding protein 39 OS=Danio rerio OX=7955 GN=cab39 PE=1 SV=1	39791	8	cab39
tr|E9QGK5|E9QGK5_DANRE	0.651677	1.57099	0.153543	tr|E9QGK5|E9QGK5_DANRE CCR4-NOT transcription complex, subunit 3a OS=Danio rerio OX=7955 GN=cnot3a PE=3 SV=1	95947	3	cnot3a
tr|E7FFM5|E7FFM5_DANRE	0.651471	1.57077	0.128976	tr|E7FFM5|E7FFM5_DANRE Proline dehydrogenase OS=Danio rerio OX=7955 GN=prodha PE=1 SV=2	72378	4	prodha
sp|Q5RI56|OPTN_DANRE	0.648916	1.56799	0.26597	sp|Q5RI56|OPTN_DANRE Optineurin OS=Danio rerio OX=7955 GN=optn PE=2 SV=2	59062	10	optn
tr|B8JLQ7|B8JLQ7_DANRE	0.648806	1.56787	0.0351789	tr|B8JLQ7|B8JLQ7_DANRE DNA (cytosine-5-)-methyltransferase OS=Danio rerio OX=7955 GN=dnmt3aa PE=1 SV=1	96335	3	dnmt3aa
tr|F1QJU6|F1QJU6_DANRE	0.648193	1.5672	0.0779302	tr|F1QJU6|F1QJU6_DANRE Protein kinase C (Fragment) OS=Danio rerio OX=7955 GN=prkcg PE=3 SV=6	74184	11	prkcg
tr|A0A0R4IX40|A0A0R4IX40_DANRE	0.647524	1.56648	0.101546	tr|A0A0R4IX40|A0A0R4IX40_DANRE Sodium/hydrogen exchanger OS=Danio rerio OX=7955 GN=slc9a6a PE=3 SV=2	77536	5	slc9a6a
tr|A0A2R8QC47|A0A2R8QC47_DANRE	0.644792	1.56351	0.0435224	tr|A0A2R8QC47|A0A2R8QC47_DANRE Zinc finger CCCH-type-containing 12B OS=Danio rerio OX=7955 GN=zc3h12b PE=1 SV=1	97221	6	zc3h12b
sp|O12990|JAK1_DANRE	0.644601	1.56331	0.00956183	sp|O12990|JAK1_DANRE Tyrosine-protein kinase JAK1 OS=Danio rerio OX=7955 GN=jak1 PE=1 SV=1	132481	6	jak1
tr|Q6GQN9|Q6GQN9_DANRE	0.644314	1.563	0.0868583	tr|Q6GQN9|Q6GQN9_DANRE Dehydrogenase/reductase (SDR family) member 1 OS=Danio rerio OX=7955 GN=dhrs1 PE=1 SV=1	33890	16	dhrs1
tr|Q803V2|Q803V2_DANRE	0.644018	1.56267	0.175949	tr|Q803V2|Q803V2_DANRE Phosphoribosyl pyrophosphate synthetase-associated protein 2 OS=Danio rerio OX=7955 GN=prpsap2 PE=1 SV=1	39529	8	prpsap2
tr|A4QP92|A4QP92_DANRE	0.643886	1.56253	0.160047	tr|A4QP92|A4QP92_DANRE Zgc:163054 protein OS=Danio rerio OX=7955 GN=nt5c1ba PE=2 SV=1	40975	3	nt5c1ba
sp|A4IGC3|RIPL2_DANRE	0.643695	1.56233	0.0902168	sp|A4IGC3|RIPL2_DANRE RILP-like protein 2 OS=Danio rerio OX=7955 GN=rilpl2 PE=2 SV=2	22412	3	rilpl2
tr|A3KPZ9|A3KPZ9_DANRE	0.641099	1.55952	0.128422	tr|A3KPZ9|A3KPZ9_DANRE Novel protein similar to vertebrate regulator of G-protein signalling family OS=Danio rerio OX=7955 GN=si:ch211-152p11.4 PE=1 SV=1	36524	3	si:ch211-152p11.4
tr|A8KAZ3|A8KAZ3_DANRE	0.64028	1.55863	0.206341	tr|A8KAZ3|A8KAZ3_DANRE Atl2 protein OS=Danio rerio OX=7955 GN=atl2 PE=2 SV=1	67670	4	atl2
tr|A0A0R4IJ07|A0A0R4IJ07_DANRE	0.637801	1.55596	0.0196778	tr|A0A0R4IJ07|A0A0R4IJ07_DANRE Elongator complex protein 1 OS=Danio rerio OX=7955 GN=elp1 PE=1 SV=1	147177	5	elp1
sp|Q6PGY3|TXTPA_DANRE	0.636777	1.55485	0.0206858	sp|Q6PGY3|TXTPA_DANRE Tricarboxylate transport protein A, mitochondrial OS=Danio rerio OX=7955 GN=slc25a1a PE=2 SV=1	39412	4	slc25a1a
tr|Q7ZUW0|Q7ZUW0_DANRE	0.634613	1.55252	0.340446	tr|Q7ZUW0|Q7ZUW0_DANRE DnaJ (Hsp40) homolog, subfamily A, member 3A OS=Danio rerio OX=7955 GN=dnaja3a PE=1 SV=1	48913	8	dnaja3a
sp|Q2TLY1|MACO2_DANRE	0.63292	1.5507	0.120961	sp|Q2TLY1|MACO2_DANRE Macoilin-2 OS=Danio rerio OX=7955 GN=maco1b PE=2 SV=1	78344	3	maco1b
tr|A0A2R8QFH1|A0A2R8QFH1_DANRE	0.631601	1.54928	0.024153	tr|A0A2R8QFH1|A0A2R8QFH1_DANRE 28S ribosomal protein S31, mitochondrial OS=Danio rerio OX=7955 GN=mrps31 PE=1 SV=1	48650	3	mrps31
tr|E7FEP5|E7FEP5_DANRE	0.630911	1.54854	0.130038	tr|E7FEP5|E7FEP5_DANRE Adenylate cyclase type 6 OS=Danio rerio OX=7955 GN=adcy6a PE=3 SV=2	135193	6	adcy6a
tr|A2RUY2|A2RUY2_DANRE	0.630426	1.54802	0.235817	tr|A2RUY2|A2RUY2_DANRE Ribosomal protein S6 kinase OS=Danio rerio OX=7955 GN=rps6ka3b PE=2 SV=1	81069	0	rps6ka3b
tr|B8A565|B8A565_DANRE	0.630282	1.54787	0.0153972	tr|B8A565|B8A565_DANRE Complement component C9 OS=Danio rerio OX=7955 GN=c9 PE=1 SV=1	72713	19	c9
tr|F1QGE3|F1QGE3_DANRE	0.627402	1.54478	0.0737817	tr|F1QGE3|F1QGE3_DANRE Tpd52-like 1 OS=Danio rerio OX=7955 GN=tpd52l1 PE=1 SV=2	16869	3	tpd52l1
tr|B8K0C4|B8K0C4_DANRE	0.627223	1.54459	0.239281	tr|B8K0C4|B8K0C4_DANRE Nucleoside-triphosphatase, cancer-related OS=Danio rerio OX=7955 GN=ntpcr PE=1 SV=1	20404	5	ntpcr
sp|Q6P3L0|MVP_DANRE	0.626252	1.54355	0.00560884	sp|Q6P3L0|MVP_DANRE Major vault protein OS=Danio rerio OX=7955 GN=mvp PE=2 SV=1	96529	3	mvp
tr|F1QYC7|F1QYC7_DANRE	0.625182	1.54241	0.0545671	tr|F1QYC7|F1QYC7_DANRE 3-hydroxyanthranilate 3,4-dioxygenase OS=Danio rerio OX=7955 GN=haao PE=1 SV=1	33193	6	haao
tr|B0S5C5|B0S5C5_DANRE	0.624973	1.54218	0.00609345	tr|B0S5C5|B0S5C5_DANRE Acetyl-CoA acyltransferase 2 OS=Danio rerio OX=7955 GN=acaa2 PE=1 SV=1	41786	26	acaa2
tr|A0A0R4IGT8|A0A0R4IGT8_DANRE	0.624786	1.54198	0.201726	tr|A0A0R4IGT8|A0A0R4IGT8_DANRE Membrane-associated guanylate kinase inverted 3 OS=Danio rerio OX=7955 GN=wu:fi36a10 PE=1 SV=1	148438	6	wu:fi36a10
tr|F1QSK1|F1QSK1_DANRE	0.62186	1.53886	0.0444086	tr|F1QSK1|F1QSK1_DANRE Poly [ADP-ribose] polymerase OS=Danio rerio OX=7955 GN=parp3 PE=1 SV=1	59804	20	parp3
sp|B3DFV0|LYRM9_DANRE	0.62129	1.53825	0.0476175	sp|B3DFV0|LYRM9_DANRE LYR motif-containing protein 9 OS=Danio rerio OX=7955 GN=lyrm9 PE=3 SV=1	9278	1	lyrm9
sp|Q7ZVN5|SRP54_DANRE	0.621202	1.53816	0.0360481	sp|Q7ZVN5|SRP54_DANRE Signal recognition particle 54 kDa protein OS=Danio rerio OX=7955 GN=srp54 PE=2 SV=1	55753	18	srp54
tr|A3KQE0|A3KQE0_DANRE	0.621037	1.53798	0.165353	tr|A3KQE0|A3KQE0_DANRE Si:dkey-29p10.4 OS=Danio rerio OX=7955 GN=si:dkey-29p10.4 PE=1 SV=1	80210	12	si:dkey-29p10.4
tr|B3DG87|B3DG87_DANRE	0.62101	1.53795	0.0144799	tr|B3DG87|B3DG87_DANRE Numb homolog (Drosophila) OS=Danio rerio OX=7955 GN=numb PE=2 SV=1	73019	7	numb
sp|Q7SY06|HACD3_DANRE	0.620795	1.53772	0.0675031	sp|Q7SY06|HACD3_DANRE Very-long-chain (3R)-3-hydroxyacyl-CoA dehydratase OS=Danio rerio OX=7955 GN=hacd3 PE=2 SV=2	42412	3	hacd3
tr|F1RE23|F1RE23_DANRE	0.619846	1.53671	0.11048	tr|F1RE23|F1RE23_DANRE COMM domain-containing protein 3 OS=Danio rerio OX=7955 GN=commd3 PE=1 SV=1	21301	4	commd3
tr|A0A2R8QAD9|A0A2R8QAD9_DANRE	0.619652	1.5365	0.0617913	tr|A0A2R8QAD9|A0A2R8QAD9_DANRE Wu:fj59g11 OS=Danio rerio OX=7955 GN=wu:fj59g11 PE=1 SV=1	143327	11	wu:fj59g11
sp|Q7ZUV7|EMSY_DANRE	0.619412	1.53625	0.253174	sp|Q7ZUV7|EMSY_DANRE BRCA2-interacting transcriptional repressor EMSY OS=Danio rerio OX=7955 GN=emsy PE=2 SV=1	122200	12	emsy
tr|Q3YMK9|Q3YMK9_DANRE	0.618774	1.53557	0.269753	tr|Q3YMK9|Q3YMK9_DANRE Citrate hydro-lyase OS=Danio rerio OX=7955 GN=aco1 PE=2 SV=1	98938	2	aco1
tr|A0A286Y8N3|A0A286Y8N3_DANRE	0.618354	1.53512	0.161355	tr|A0A286Y8N3|A0A286Y8N3_DANRE Hormone-sensitive lipase OS=Danio rerio OX=7955 GN=lipeb PE=1 SV=2	93047	5	lipeb
tr|Q5CZN2|Q5CZN2_DANRE	0.618328	1.5351	0.0832733	tr|Q5CZN2|Q5CZN2_DANRE Tryptophanyl-tRNA synthetase OS=Danio rerio OX=7955 GN=wars2 PE=2 SV=1	40715	1	wars2
tr|X1WEE0|X1WEE0_DANRE	0.618198	1.53496	0.254811	tr|X1WEE0|X1WEE0_DANRE Syntaxin 16 OS=Danio rerio OX=7955 GN=stx16 PE=1 SV=1	35628	7	stx16
tr|F1RDK3|F1RDK3_DANRE	0.615363	1.53194	0.527004	tr|F1RDK3|F1RDK3_DANRE Protein lin-7 homolog OS=Danio rerio OX=7955 GN=lin7b PE=3 SV=1	24360	6	lin7b
tr|A0A2R8Q0G1|A0A2R8Q0G1_DANRE	0.615263	1.53184	0.0651551	tr|A0A2R8Q0G1|A0A2R8Q0G1_DANRE Unc-80 homolog (C. elegans) OS=Danio rerio OX=7955 GN=unc80 PE=4 SV=1	352020	9	unc80
tr|A0A2R8RPD7|A0A2R8RPD7_DANRE	0.614006	1.5305	0.0637964	tr|A0A2R8RPD7|A0A2R8RPD7_DANRE TAO kinase 1a OS=Danio rerio OX=7955 GN=taok1a PE=4 SV=1	117353	7	taok1a
tr|C5IG44|C5IG44_DANRE	0.613522	1.52999	0.0846968	tr|C5IG44|C5IG44_DANRE Glial fibrillary acidic protein (Fragment) OS=Danio rerio OX=7955 GN=gfap PE=2 SV=1	19215	1	gfap
tr|Q7T319|Q7T319_DANRE	0.612834	1.52926	0.0192906	tr|Q7T319|Q7T319_DANRE Transcription elongation factor 1 homolog OS=Danio rerio OX=7955 GN=elof1 PE=1 SV=1	9505	1	elof1
tr|A2BF67|A2BF67_DANRE	0.612481	1.52889	0.0302456	tr|A2BF67|A2BF67_DANRE Endosulfine alpha b OS=Danio rerio OX=7955 GN=ensab PE=3 SV=1	12889	4	ensab
sp|Q1L8X2|ENSA_DANRE	0.611059	1.52738	0.103148	sp|Q1L8X2|ENSA_DANRE Alpha-endosulfine OS=Danio rerio OX=7955 GN=ensa PE=2 SV=1	13756	2	ensa
tr|D2X2G5|D2X2G5_DANRE	0.611033	1.52735	0.134318	tr|D2X2G5|D2X2G5_DANRE Neuroligin 4b OS=Danio rerio OX=7955 GN=nlgn4xb PE=2 SV=1	89236	6	nlgn4xb
tr|Q1LX72|Q1LX72_DANRE	0.609068	1.52527	0.318785	tr|Q1LX72|Q1LX72_DANRE Synemin, intermediate filament protein OS=Danio rerio OX=7955 GN=synm PE=3 SV=1	122137	15	synm
tr|Q5XJS4|Q5XJS4_DANRE	0.608873	1.52507	0.0978378	tr|Q5XJS4|Q5XJS4_DANRE RAB34, member RAS oncogene family OS=Danio rerio OX=7955 GN=rab34a PE=2 SV=1	29160	3	rab34a
tr|A0A140LGH2|A0A140LGH2_DANRE	0.608484	1.52466	0.169522	tr|A0A140LGH2|A0A140LGH2_DANRE Leucine-rich repeat and Ig domain-containing 2a (Fragment) OS=Danio rerio OX=7955 GN=lingo2a PE=4 SV=1	69040	3	lingo2a
tr|A0A0R4IGU3|A0A0R4IGU3_DANRE	0.607214	1.52332	0.0908415	tr|A0A0R4IGU3|A0A0R4IGU3_DANRE Zgc:172139 OS=Danio rerio OX=7955 GN=zgc:172139 PE=4 SV=1	48271	3	zgc:172139
tr|A0A286YBG9|A0A286YBG9_DANRE	0.606432	1.52249	0.0539318	tr|A0A286YBG9|A0A286YBG9_DANRE ADP-dependent glucokinase OS=Danio rerio OX=7955 GN=adpgk PE=1 SV=1	54297	6	adpgk
tr|A0A0R4IZB7|A0A0R4IZB7_DANRE	0.606345	1.5224	0.333797	tr|A0A0R4IZB7|A0A0R4IZB7_DANRE Si:dkey-11f4.16 OS=Danio rerio OX=7955 GN=si:dkey-11f4.16 PE=4 SV=1	27726	8	si:dkey-11f4.16
tr|Q5PR57|Q5PR57_DANRE	0.605974	1.52201	0.113447	tr|Q5PR57|Q5PR57_DANRE Dihydroorotate dehydrogenase (quinone), mitochondrial OS=Danio rerio OX=7955 GN=dhodh PE=2 SV=1	43857	2	dhodh
tr|B8A4U1|B8A4U1_DANRE	0.603267	1.51915	0.0491914	tr|B8A4U1|B8A4U1_DANRE CD99 molecule OS=Danio rerio OX=7955 GN=cd99 PE=1 SV=1	21550	1	cd99
sp|A8WE67|KBP_DANRE	0.60248	1.51832	0.0906444	sp|A8WE67|KBP_DANRE KIF-binding protein OS=Danio rerio OX=7955 GN=kifbp PE=2 SV=1	72816	1	kifbp
tr|A0A0R4IMQ7|A0A0R4IMQ7_DANRE	0.60226	1.51809	0.0903501	tr|A0A0R4IMQ7|A0A0R4IMQ7_DANRE Phosphatidate cytidylyltransferase OS=Danio rerio OX=7955 GN=cds1 PE=3 SV=1	51992	2	cds1
tr|B0S5V5|B0S5V5_DANRE	0.601353	1.51714	0.312113	tr|B0S5V5|B0S5V5_DANRE Protein-serine/threonine phosphatase OS=Danio rerio OX=7955 GN=ctdsp1 PE=4 SV=1	29843	4	ctdsp1
tr|F1R159|F1R159_DANRE	0.601064	1.51684	0.193497	tr|F1R159|F1R159_DANRE Synaptic functional regulator FMR1 OS=Danio rerio OX=7955 GN=fmr1 PE=1 SV=1	63809	15	fmr1
tr|Q6DEJ9|Q6DEJ9_DANRE	0.600044	1.51576	0.0773422	tr|Q6DEJ9|Q6DEJ9_DANRE Dolichol-phosphate mannosyltransferase subunit 1 OS=Danio rerio OX=7955 GN=dpm1 PE=1 SV=1	28132	7	dpm1
sp|F1RAX8|COQ6_DANRE	0.597844	1.51345	0.137	sp|F1RAX8|COQ6_DANRE Ubiquinone biosynthesis monooxygenase COQ6, mitochondrial OS=Danio rerio OX=7955 GN=coq6 PE=2 SV=1	52999	14	coq6
tr|Q803X7|Q803X7_DANRE	0.597608	1.51321	0.00981339	tr|Q803X7|Q803X7_DANRE Nap1l1 protein OS=Danio rerio OX=7955 GN=nap1l1 PE=1 SV=1	44477	10	nap1l1
tr|B0R0Q4|B0R0Q4_DANRE	0.597449	1.51304	0.233999	tr|B0R0Q4|B0R0Q4_DANRE Novel protein similar to vertebrate vasodilator-stimulated phosphoprotein (VASP) OS=Danio rerio OX=7955 GN=vaspb PE=3 SV=1	44164	5	vaspb
tr|Q7ZUV8|Q7ZUV8_DANRE	0.59717	1.51275	0.491378	tr|Q7ZUV8|Q7ZUV8_DANRE Zgc:56033 OS=Danio rerio OX=7955 GN=pebp1 PE=2 SV=1	20762	4	pebp1
tr|A0A2R8QLP9|A0A2R8QLP9_DANRE	0.596052	1.51157	0.251552	tr|A0A2R8QLP9|A0A2R8QLP9_DANRE Dopamine beta-hydroxylase (dopamine beta-monooxygenase) OS=Danio rerio OX=7955 GN=dbh PE=3 SV=1	69355	4	dbh
tr|E7FEM4|E7FEM4_DANRE	0.595936	1.51145	0.203334	tr|E7FEM4|E7FEM4_DANRE Si:rp71-19m20.1 OS=Danio rerio OX=7955 GN=si:rp71-19m20.1 PE=4 SV=1	39534	4	si:rp71-19m20.1
tr|F1QBM2|F1QBM2_DANRE	0.59551	1.51101	0.205663	tr|F1QBM2|F1QBM2_DANRE Programmed cell death protein 4 OS=Danio rerio OX=7955 GN=pdcd4a PE=1 SV=1	52022	8	pdcd4a
sp|Q6NWC9|GKAP1_DANRE	0.594562	1.51001	0.151243	sp|Q6NWC9|GKAP1_DANRE G kinase-anchoring protein 1 OS=Danio rerio OX=7955 GN=gkap1 PE=2 SV=1	41960	2	gkap1
tr|E7FDZ0|E7FDZ0_DANRE	0.593961	1.50939	0.100597	tr|E7FDZ0|E7FDZ0_DANRE UDP glycosyltransferase 8 OS=Danio rerio OX=7955 GN=ugt8 PE=3 SV=2	61220	4	ugt8
sp|Q6PC29|143G1_DANRE	0.593379	1.50878	0.503478	sp|Q6PC29|143G1_DANRE 14-3-3 protein gamma-1 OS=Danio rerio OX=7955 GN=ywhag1 PE=2 SV=1	28235	2	ywhag1
tr|A0A0H2UKH3|A0A0H2UKH3_DANRE	0.593291	1.50868	0.0947906	tr|A0A0H2UKH3|A0A0H2UKH3_DANRE Glutamate receptor, metabotropic 4 OS=Danio rerio OX=7955 GN=grm4 PE=3 SV=2	101802	13	grm4
tr|F8W298|F8W298_DANRE	0.592657	1.50802	0.0792744	tr|F8W298|F8W298_DANRE Zgc:174259 OS=Danio rerio OX=7955 GN=zgc:174259 PE=3 SV=1	46721	1	zgc:174259
tr|Q6ZM82|Q6ZM82_DANRE	0.592527	1.50789	0.0943378	tr|Q6ZM82|Q6ZM82_DANRE Component of oligomeric Golgi complex 2 OS=Danio rerio OX=7955 GN=cog2 PE=1 SV=2	82409	7	cog2
tr|A0A286YB85|A0A286YB85_DANRE	0.592488	1.50785	0.217125	tr|A0A286YB85|A0A286YB85_DANRE Plakophilin 3b OS=Danio rerio OX=7955 GN=pkp3b PE=1 SV=1	86314	4	pkp3b
tr|B8A4D7|B8A4D7_DANRE	0.591025	1.50632	0.39389	tr|B8A4D7|B8A4D7_DANRE Ribosome-binding protein 1a OS=Danio rerio OX=7955 GN=rrbp1a PE=1 SV=1	145517	10	rrbp1a
tr|A0A286Y884|A0A286Y884_DANRE	0.590637	1.50591	0.107675	tr|A0A286Y884|A0A286Y884_DANRE Uveal autoantigen with coiled-coil domains and ankyrin repeats b OS=Danio rerio OX=7955 GN=uacab PE=1 SV=1	157049	13	uacab
tr|F1QEI3|F1QEI3_DANRE	0.59018	1.50543	0.159753	tr|F1QEI3|F1QEI3_DANRE Cell cycle control protein OS=Danio rerio OX=7955 GN=tmem30aa PE=3 SV=1	41695	5	tmem30aa
tr|Q0VFW2|Q0VFW2_DANRE	0.589313	1.50453	0.185716	tr|Q0VFW2|Q0VFW2_DANRE Elmod2 protein (Fragment) OS=Danio rerio OX=7955 GN=elmod2 PE=2 SV=1	35882	1	elmod2
tr|E7FFB1|E7FFB1_DANRE	0.589164	1.50437	0.186292	tr|E7FFB1|E7FFB1_DANRE A kinase (PRKA) anchor protein 9 OS=Danio rerio OX=7955 GN=akap9 PE=1 SV=1	257071	37	akap9
tr|A2BF91|A2BF91_DANRE	0.58912	1.50433	0.0709012	tr|A2BF91|A2BF91_DANRE Zgc:101858 OS=Danio rerio OX=7955 GN=zgc:101858 PE=1 SV=1	28118	6	zgc:101858
sp|Q08CN0|TPPC2_DANRE	0.587154	1.50228	0.0682831	sp|Q08CN0|TPPC2_DANRE Trafficking protein particle complex subunit 2 OS=Danio rerio OX=7955 GN=trappc2 PE=2 SV=1	16454	3	trappc2
tr|E7F1D8|E7F1D8_DANRE	0.586533	1.50163	0.0366496	tr|E7F1D8|E7F1D8_DANRE Si:ch1073-186i23.1 OS=Danio rerio OX=7955 GN=si:ch1073-186i23.1 PE=4 SV=3	163057	5	si:ch1073-186i23.1
tr|A0A0R4IDN1|A0A0R4IDN1_DANRE	0.585994	1.50107	0.0408686	tr|A0A0R4IDN1|A0A0R4IDN1_DANRE Laminin, beta 1a OS=Danio rerio OX=7955 GN=lamb1a PE=1 SV=2	197101	3	lamb1a
tr|A0A0R4IKT5|A0A0R4IKT5_DANRE	0.585814	1.50089	0.0672931	tr|A0A0R4IKT5|A0A0R4IKT5_DANRE Si:ch73-45o6.2 OS=Danio rerio OX=7955 GN=atg2a PE=1 SV=2	223440	10	atg2a
tr|B2GT35|B2GT35_DANRE	0.584532	1.49955	0.273132	tr|B2GT35|B2GT35_DANRE Ctsf protein OS=Danio rerio OX=7955 GN=ctsf PE=2 SV=1	52708	6	ctsf
tr|A0A0G2L264|A0A0G2L264_DANRE	0.584188	1.49919	0.194641	tr|A0A0G2L264|A0A0G2L264_DANRE RAB35, member RAS oncogene family a OS=Danio rerio OX=7955 GN=rab35a PE=4 SV=1	22146	3	rab35a
sp|A3KPP4|S2535_DANRE	0.58299	1.49795	0.182917	sp|A3KPP4|S2535_DANRE Solute carrier family 25 member 35 OS=Danio rerio OX=7955 GN=slc25a35 PE=2 SV=1	32284	3	slc25a35
tr|A0A286YBQ6|A0A286YBQ6_DANRE	0.582097	1.49702	0.165778	tr|A0A286YBQ6|A0A286YBQ6_DANRE Family with sequence similarity 114 member A1 OS=Danio rerio OX=7955 GN=fam114a1 PE=1 SV=1	59449	4	fam114a1
sp|Q6DBQ8|CPTP_DANRE	0.58105	1.49594	0.210851	sp|Q6DBQ8|CPTP_DANRE Ceramide-1-phosphate transfer protein OS=Danio rerio OX=7955 GN=cptp PE=2 SV=1	23993	5	cptp
tr|Q5BKW2|Q5BKW2_DANRE	0.579806	1.49465	0.511157	tr|Q5BKW2|Q5BKW2_DANRE Cadherin 6 OS=Danio rerio OX=7955 GN=cdh6 PE=2 SV=1	88367	3	cdh6
tr|Q6XG62|Q6XG62_DANRE	0.579461	1.49429	0.245057	tr|Q6XG62|Q6XG62_DANRE Protein S100 OS=Danio rerio OX=7955 GN=icn PE=1 SV=1	10407	2	icn
tr|A0A286Y8H5|A0A286Y8H5_DANRE	0.57885	1.49366	0.238774	tr|A0A286Y8H5|A0A286Y8H5_DANRE Phospholipase A(2) OS=Danio rerio OX=7955 GN=pla2g6 PE=1 SV=1	87667	13	pla2g6
tr|A0A140LGH7|A0A140LGH7_DANRE	0.578482	1.49328	0.134796	tr|A0A140LGH7|A0A140LGH7_DANRE Si:cabz01090193.1 (Fragment) OS=Danio rerio OX=7955 GN=si:cabz01090193.1 PE=4 SV=2	24764	2	si:cabz01090193.1
tr|A0A0R4IS04|A0A0R4IS04_DANRE	0.578158	1.49294	0.61065	tr|A0A0R4IS04|A0A0R4IS04_DANRE Myelin protein zero OS=Danio rerio OX=7955 GN=mpz PE=4 SV=1	23085	0	mpz
tr|F1R9A9|F1R9A9_DANRE	0.577624	1.49239	0.0064422	tr|F1R9A9|F1R9A9_DANRE Serpin peptidase inhibitor, clade B (ovalbumin), member 1,-like 1 OS=Danio rerio OX=7955 GN=serpinb1l1 PE=1 SV=1	43458	1	serpinb1l1
tr|A0A2R8QSH5|A0A2R8QSH5_DANRE	0.577054	1.4918	0.159791	tr|A0A2R8QSH5|A0A2R8QSH5_DANRE Disco-interacting protein 2 homolog A OS=Danio rerio OX=7955 GN=dip2a PE=1 SV=1	176123	6	dip2a
tr|E7F5A4|E7F5A4_DANRE	0.576364	1.49109	0.387699	tr|E7F5A4|E7F5A4_DANRE Si:dkey-261m9.12 OS=Danio rerio OX=7955 GN=si:dkey-261m9.12 PE=1 SV=1	20653	3	si:dkey-261m9.12
tr|A0A0R4IIB1|A0A0R4IIB1_DANRE	0.576287	1.49101	0.230122	tr|A0A0R4IIB1|A0A0R4IIB1_DANRE Complement factor H OS=Danio rerio OX=7955 GN=cfh PE=1 SV=2	101931	7	cfh
tr|E9QH04|E9QH04_DANRE	0.576255	1.49097	0.0211097	tr|E9QH04|E9QH04_DANRE FLVCR heme transporter 2b OS=Danio rerio OX=7955 GN=flvcr2b PE=4 SV=1	54912	4	flvcr2b
tr|Q7ZV63|Q7ZV63_DANRE	0.576233	1.49095	0.0253688	tr|Q7ZV63|Q7ZV63_DANRE Mkrn2 protein OS=Danio rerio OX=7955 GN=mkrn2 PE=2 SV=1	33729	1	mkrn2
tr|F1Q8M8|F1Q8M8_DANRE	0.576175	1.49089	0.0297366	tr|F1Q8M8|F1Q8M8_DANRE Poly(rC)-binding protein 4 OS=Danio rerio OX=7955 GN=pcbp4 PE=4 SV=1	48147	5	pcbp4
tr|F1R2G5|F1R2G5_DANRE	0.575928	1.49064	0.0635624	tr|F1R2G5|F1R2G5_DANRE Zgc:101569 OS=Danio rerio OX=7955 GN=zgc:101569 PE=1 SV=1	32779	7	zgc:101569
tr|X1WCZ6|X1WCZ6_DANRE	0.574906	1.48958	0.253683	tr|X1WCZ6|X1WCZ6_DANRE SH3 and multiple ankyrin repeat domains 1 OS=Danio rerio OX=7955 GN=shank1 PE=3 SV=1	95079	13	shank1
tr|F8W2E8|F8W2E8_DANRE	0.574176	1.48883	0.185488	tr|F8W2E8|F8W2E8_DANRE RNA-binding motif protein 27 OS=Danio rerio OX=7955 GN=rbm27 PE=1 SV=1	115273	4	rbm27
tr|A0A2R8Q516|A0A2R8Q516_DANRE	0.57238	1.48697	0.00300025	tr|A0A2R8Q516|A0A2R8Q516_DANRE GTPase-activating protein and VPS9 domains 1 OS=Danio rerio OX=7955 GN=gapvd1 PE=1 SV=1	164147	39	gapvd1
sp|Q68EK7|RAB4B_DANRE	0.572048	1.48663	0.0199621	sp|Q68EK7|RAB4B_DANRE Ras-related protein Rab-4B OS=Danio rerio OX=7955 GN=rab4b PE=2 SV=1	23725	6	rab4b
tr|A1L1F2|A1L1F2_DANRE	0.571566	1.48614	0.29822	tr|A1L1F2|A1L1F2_DANRE RING-type E3 ubiquitin transferase OS=Danio rerio OX=7955 GN=trim36 PE=2 SV=1	81102	10	trim36
tr|Q5TZI1|Q5TZI1_DANRE	0.570536	1.48508	0.136726	tr|Q5TZI1|Q5TZI1_DANRE Reticulon OS=Danio rerio OX=7955 GN=rtn1b PE=1 SV=1	24193	7	rtn1b
tr|E7EZ05|E7EZ05_DANRE	0.570099	1.48463	0.102935	tr|E7EZ05|E7EZ05_DANRE Oxoglutarate dehydrogenase (succinyl-transferring) OS=Danio rerio OX=7955 GN=ogdhb PE=1 SV=1	115785	15	ogdhb
tr|F6NIE2|F6NIE2_DANRE	0.570088	1.48461	0.0359517	tr|F6NIE2|F6NIE2_DANRE Si:ch211-113e8.10 OS=Danio rerio OX=7955 GN=si:ch211-113e8.10 PE=4 SV=1	87663	3	si:ch211-113e8.10
tr|Q7SXY0|Q7SXY0_DANRE	0.568977	1.48347	0.0263703	tr|Q7SXY0|Q7SXY0_DANRE Vesicle-fusing ATPase OS=Danio rerio OX=7955 GN=vps4b PE=2 SV=1	48918	11	vps4b
tr|A0A0R4IM03|A0A0R4IM03_DANRE	0.568687	1.48317	0.081006	tr|A0A0R4IM03|A0A0R4IM03_DANRE Si:ch73-18b11.1 OS=Danio rerio OX=7955 GN=si:ch73-18b11.1 PE=1 SV=2	103948	3	si:ch73-18b11.1
tr|A0A2R8QQM5|A0A2R8QQM5_DANRE	0.568667	1.48315	0.421162	tr|A0A2R8QQM5|A0A2R8QQM5_DANRE 40S ribosomal protein S30 OS=Danio rerio OX=7955 GN=faub PE=3 SV=1	14631	2	faub
tr|E7FF48|E7FF48_DANRE	0.568135	1.48261	0.135371	tr|E7FF48|E7FF48_DANRE Nuclear receptor corepressor 2 OS=Danio rerio OX=7955 GN=ncor2 PE=1 SV=2	254337	7	ncor2
tr|Q7ZVS4|Q7ZVS4_DANRE	0.566636	1.48107	0.112801	tr|Q7ZVS4|Q7ZVS4_DANRE (S)-3-amino-2-methylpropionate transaminase OS=Danio rerio OX=7955 GN=abat PE=2 SV=1	45481	3	abat
tr|F1QP13|F1QP13_DANRE	0.566346	1.48077	0.0938682	tr|F1QP13|F1QP13_DANRE Transforming growth factor-beta receptor-associated protein 1 homolog OS=Danio rerio OX=7955 GN=tgfbrap1 PE=1 SV=1	97107	8	tgfbrap1
tr|A0A2R8QTA1|A0A2R8QTA1_DANRE	0.566309	1.48073	0.222851	tr|A0A2R8QTA1|A0A2R8QTA1_DANRE Thy-1 cell surface antigen OS=Danio rerio OX=7955 GN=thy1 PE=1 SV=1	17017	3	thy1
tr|A0A2R8PVQ8|A0A2R8PVQ8_DANRE	0.565712	1.48012	0.218158	tr|A0A2R8PVQ8|A0A2R8PVQ8_DANRE Adhesion G protein-coupled receptor B1a OS=Danio rerio OX=7955 GN=adgrb1a PE=4 SV=1	175162	10	adgrb1a
tr|F1Q836|F1Q836_DANRE	0.565597	1.48	0.299675	tr|F1Q836|F1Q836_DANRE Phosphate transporter OS=Danio rerio OX=7955 GN=slc20a2 PE=3 SV=2	71917	5	slc20a2
tr|A4IFW3|A4IFW3_DANRE	0.565452	1.47985	0.301694	tr|A4IFW3|A4IFW3_DANRE Protein-tyrosine-phosphatase OS=Danio rerio OX=7955 GN=ptpro PE=2 SV=1	138902	7	ptpro
tr|E9QFU7|E9QFU7_DANRE	0.565396	1.47979	0.184838	tr|E9QFU7|E9QFU7_DANRE Tyrosine-protein kinase OS=Danio rerio OX=7955 GN=syk PE=3 SV=3	67517	4	syk
tr|A0A0R4IUJ5|A0A0R4IUJ5_DANRE	0.565344	1.47974	0.0893557	tr|A0A0R4IUJ5|A0A0R4IUJ5_DANRE GlcNAc kinase OS=Danio rerio OX=7955 GN=nagk PE=1 SV=1	37065	9	nagk
tr|Q7SX58|Q7SX58_DANRE	0.565333	1.47973	0.148184	tr|Q7SX58|Q7SX58_DANRE Coronin OS=Danio rerio OX=7955 GN=coro1a PE=1 SV=1	50719	9	coro1a
tr|A0A2R8QKQ7|A0A2R8QKQ7_DANRE	0.564437	1.47881	0.25047	tr|A0A2R8QKQ7|A0A2R8QKQ7_DANRE WASP-like actin nucleation-promoting factor a OS=Danio rerio OX=7955 GN=wasla PE=4 SV=1	52065	5	wasla
tr|Q6P3M0|Q6P3M0_DANRE	0.564325	1.4787	0.352262	tr|Q6P3M0|Q6P3M0_DANRE Solute carrier family 30 (Zinc transporter), member 1 OS=Danio rerio OX=7955 GN=slc30a1a PE=2 SV=1	53917	3	slc30a1a
tr|A0A2R8QHG1|A0A2R8QHG1_DANRE	0.564194	1.47856	0.174613	tr|A0A2R8QHG1|A0A2R8QHG1_DANRE Rap guanine nucleotide exchange factor (GEF) 1a OS=Danio rerio OX=7955 GN=rapgef1a PE=4 SV=1	110096	9	rapgef1a
tr|B3DHE6|B3DHE6_DANRE	0.562442	1.47677	0.410127	tr|B3DHE6|B3DHE6_DANRE Acyl-coenzyme A diphosphatase NUDT19 OS=Danio rerio OX=7955 GN=nudt19 PE=2 SV=1	44920	5	nudt19
tr|A0A0R4IML0|A0A0R4IML0_DANRE	0.562302	1.47662	0.368151	tr|A0A0R4IML0|A0A0R4IML0_DANRE Macrophage-capping protein OS=Danio rerio OX=7955 GN=capgb PE=1 SV=1	38663	9	capgb
sp|Q6DHH7|LZIC_DANRE	0.561453	1.47575	0.314128	sp|Q6DHH7|LZIC_DANRE Protein LZIC OS=Danio rerio OX=7955 GN=lzic PE=1 SV=1	21322	6	lzic
tr|Q5XJ69|Q5XJ69_DANRE	0.561077	1.47537	0.137165	tr|Q5XJ69|Q5XJ69_DANRE Arylamine N-acetyltransferase OS=Danio rerio OX=7955 GN=zgc:103601 PE=2 SV=1	33106	6	zgc:103601
tr|B8A467|B8A467_DANRE	0.560871	1.47516	0.152444	tr|B8A467|B8A467_DANRE Protein kinase C OS=Danio rerio OX=7955 GN=prkceb PE=3 SV=1	84108	7	prkceb
tr|E7F3U0|E7F3U0_DANRE	0.559776	1.47404	0.328175	tr|E7F3U0|E7F3U0_DANRE Calmodulin-regulated spectrin-associated protein family, member 3 OS=Danio rerio OX=7955 GN=camsap3 PE=3 SV=1	156599	14	camsap3
tr|E7F0G8|E7F0G8_DANRE	0.559277	1.47353	0.211683	tr|E7F0G8|E7F0G8_DANRE Rho GTPase-activating protein 32b OS=Danio rerio OX=7955 GN=arhgap32b PE=1 SV=1	215189	11	arhgap32b
tr|A0A0R4INU8|A0A0R4INU8_DANRE	0.559093	1.47334	0.292972	tr|A0A0R4INU8|A0A0R4INU8_DANRE Coiled-coil domain containing 50 OS=Danio rerio OX=7955 GN=ccdc50a PE=4 SV=2	37038	4	ccdc50a
sp|Q6DHB1|DNAL1_DANRE	0.558816	1.47306	0.128673	sp|Q6DHB1|DNAL1_DANRE Dynein axonemal light chain 1 OS=Danio rerio OX=7955 GN=dnal1 PE=2 SV=1	21495	4	dnal1
sp|Q1L9A2|OPA3_DANRE	0.558177	1.47241	0.174775	sp|Q1L9A2|OPA3_DANRE Optic atrophy 3 protein homolog OS=Danio rerio OX=7955 GN=opa3 PE=3 SV=1	17306	3	opa3
tr|A2BGN1|A2BGN1_DANRE	0.557894	1.47212	0.177929	tr|A2BGN1|A2BGN1_DANRE Mevalonate kinase OS=Danio rerio OX=7955 GN=mvk PE=1 SV=1	42745	3	mvk
tr|E7FA94|E7FA94_DANRE	0.557712	1.47193	0.0182834	tr|E7FA94|E7FA94_DANRE MTSS I-BAR domain-containing 2b OS=Danio rerio OX=7955 GN=mtss1lb PE=1 SV=3	76651	13	mtss1lb
tr|F1Q5Q7|F1Q5Q7_DANRE	0.55689	1.47109	0.10514	tr|F1Q5Q7|F1Q5Q7_DANRE Exosome component 10 OS=Danio rerio OX=7955 GN=exosc10 PE=1 SV=1	102372	6	exosc10
tr|Q0P453|Q0P453_DANRE	0.555675	1.46986	0.104173	tr|Q0P453|Q0P453_DANRE Peroxisomal biogenesis factor 11 beta OS=Danio rerio OX=7955 GN=pex11b PE=1 SV=1	29627	6	pex11b
tr|A0A0R4IW74|A0A0R4IW74_DANRE	0.555071	1.46924	0.130051	tr|A0A0R4IW74|A0A0R4IW74_DANRE FGFR1 oncogene partner OS=Danio rerio OX=7955 GN=cep43 PE=1 SV=1	53585	2	cep43
sp|Q6PEI3|PHR4B_DANRE	0.553386	1.46753	0.178017	sp|Q6PEI3|PHR4B_DANRE Phosphatase and actin regulator 4B OS=Danio rerio OX=7955 GN=phactr4b PE=1 SV=2	84195	8	phactr4b
tr|A0A2R8QRU4|A0A2R8QRU4_DANRE	0.55229	1.46641	0.00551297	tr|A0A2R8QRU4|A0A2R8QRU4_DANRE Caldesmon 1a OS=Danio rerio OX=7955 GN=cald1a PE=1 SV=1	60192	8	cald1a
tr|A5PLC7|A5PLC7_DANRE	0.551517	1.46563	0.0574264	tr|A5PLC7|A5PLC7_DANRE RAB8B, member RAS oncogene family OS=Danio rerio OX=7955 GN=rab8b PE=1 SV=1	23730	2	rab8b
sp|Q5XJP1|EIPR1_DANRE	0.550993	1.46509	0.0315341	sp|Q5XJP1|EIPR1_DANRE EARP-interacting protein homolog OS=Danio rerio OX=7955 GN=eipr1 PE=2 SV=1	43588	9	eipr1
tr|E7F242|E7F242_DANRE	0.550646	1.46474	0.1278	tr|E7F242|E7F242_DANRE Zinc finger, FYVE domain-containing 1 OS=Danio rerio OX=7955 GN=zfyve1 PE=1 SV=2	86149	7	zfyve1
tr|A8WG39|A8WG39_DANRE	0.549592	1.46367	0.0649255	tr|A8WG39|A8WG39_DANRE Chchd7 protein OS=Danio rerio OX=7955 GN=chchd7 PE=2 SV=1	10118	3	chchd7
sp|Q5U3V9|SNF8_DANRE	0.547801	1.46186	0.293005	sp|Q5U3V9|SNF8_DANRE Vacuolar-sorting protein SNF8 OS=Danio rerio OX=7955 GN=snf8 PE=2 SV=2	28850	4	snf8
tr|Q804V9|Q804V9_DANRE	0.547404	1.46145	0.272495	tr|Q804V9|Q804V9_DANRE Parvalbumin OS=Danio rerio OX=7955 GN=pvalb5 PE=2 SV=1	11764	4	pvalb5
tr|A5PF53|A5PF53_DANRE	0.546917	1.46096	0.0408332	tr|A5PF53|A5PF53_DANRE Rho GTPase-activating protein 35b OS=Danio rerio OX=7955 GN=arhgap35b PE=1 SV=1	171401	20	arhgap35b
tr|Q75T39|Q75T39_DANRE	0.545635	1.45966	0.367288	tr|Q75T39|Q75T39_DANRE Neurocan (Fragment) OS=Danio rerio OX=7955 GN=ncana PE=2 SV=1	11244	2	ncana
tr|A2BG45|A2BG45_DANRE	0.545622	1.45965	0.0517074	tr|A2BG45|A2BG45_DANRE G protein-coupled receptor kinase-interacting ArfGAP 2a OS=Danio rerio OX=7955 GN=git2a PE=4 SV=1	83348	6	git2a
tr|A0A2R8PWI2|A0A2R8PWI2_DANRE	0.545374	1.4594	0.0941048	tr|A0A2R8PWI2|A0A2R8PWI2_DANRE Histone acetyltransferase type B catalytic subunit OS=Danio rerio OX=7955 GN=hat1 PE=1 SV=1	47249	6	hat1
tr|Q1LVK8|Q1LVK8_DANRE	0.544646	1.45866	0.0393499	tr|Q1LVK8|Q1LVK8_DANRE Signal peptidase complex catalytic subunit SEC11 OS=Danio rerio OX=7955 GN=sec11a PE=1 SV=1	20562	7	sec11a
tr|A0A2R8Q5R5|A0A2R8Q5R5_DANRE	0.544503	1.45852	0.129135	tr|A0A2R8Q5R5|A0A2R8Q5R5_DANRE Attractin OS=Danio rerio OX=7955 GN=atrn PE=1 SV=1	150044	3	atrn
tr|E7FDZ2|E7FDZ2_DANRE	0.541209	1.45519	0.061731	tr|E7FDZ2|E7FDZ2_DANRE Glutamate decarboxylase 1a OS=Danio rerio OX=7955 GN=gad1a PE=3 SV=4	67241	8	gad1a
tr|A0A0R4IR82|A0A0R4IR82_DANRE	0.541016	1.455	0.151946	tr|A0A0R4IR82|A0A0R4IR82_DANRE Geranylgeranyl transferase type I subunit beta (Fragment) OS=Danio rerio OX=7955 GN=pggt1b PE=1 SV=1	35543	1	pggt1b
sp|Q7ZV15|S22BA_DANRE	0.540806	1.45478	0.127321	sp|Q7ZV15|S22BA_DANRE Vesicle-trafficking protein SEC22b-A OS=Danio rerio OX=7955 GN=sec22ba PE=2 SV=1	24390	3	sec22ba
tr|Q803G3|Q803G3_DANRE	0.539692	1.45366	0.142755	tr|Q803G3|Q803G3_DANRE Serine/threonine-protein phosphatase OS=Danio rerio OX=7955 GN=ppp2cb PE=1 SV=1	35562	3	ppp2cb
tr|A0A0R4IPR2|A0A0R4IPR2_DANRE	0.538823	1.45279	0.235537	tr|A0A0R4IPR2|A0A0R4IPR2_DANRE TNFAIP3-interacting protein 1 OS=Danio rerio OX=7955 GN=tnip1 PE=4 SV=1	74981	5	tnip1
tr|F1QBR7|F1QBR7_DANRE	0.53803	1.45199	0.280866	tr|F1QBR7|F1QBR7_DANRE Calmodulin-regulated spectrin-associated protein 3-like OS=Danio rerio OX=7955 GN=LOC100007608 PE=3 SV=2	111075	8	LOC100007608
tr|E7EXU6|E7EXU6_DANRE	0.537313	1.45127	0.186365	tr|E7EXU6|E7EXU6_DANRE Solute carrier family 7 member 8a OS=Danio rerio OX=7955 GN=slc7a8a PE=3 SV=1	57701	7	slc7a8a
tr|B0S7A3|B0S7A3_DANRE	0.536658	1.45061	0.103609	tr|B0S7A3|B0S7A3_DANRE Si:dkey-70p6.1 OS=Danio rerio OX=7955 GN=si:dkey-70p6.1 PE=4 SV=1	54069	4	si:dkey-70p6.1
tr|A0A0R4IK63|A0A0R4IK63_DANRE	0.536103	1.45005	0.526773	tr|A0A0R4IK63|A0A0R4IK63_DANRE Mitogen-activated protein kinase kinase kinase 4 OS=Danio rerio OX=7955 GN=map3k4 PE=1 SV=1	175444	7	map3k4
tr|Q5XFY2|Q5XFY2_DANRE	0.535788	1.44973	0.184197	tr|Q5XFY2|Q5XFY2_DANRE Pdcd8 protein OS=Danio rerio OX=7955 GN=aifm1 PE=2 SV=1	67062	0	aifm1
sp|Q6PGW3|ARMD3_DANRE	0.535587	1.44953	0.0646948	sp|Q6PGW3|ARMD3_DANRE Armadillo-like helical domain-containing protein 3 OS=Danio rerio OX=7955 GN=armh3 PE=2 SV=2	78779	9	armh3
tr|Q0PKX5|Q0PKX5_DANRE	0.53447	1.44841	0.257175	tr|Q0PKX5|Q0PKX5_DANRE Apo-1 antigen (Fragment) OS=Danio rerio OX=7955 GN=fas PE=2 SV=1	31640	3	fas
sp|Q503X2|RM04_DANRE	0.534375	1.44832	0.153225	sp|Q503X2|RM04_DANRE 39S ribosomal protein L4, mitochondrial OS=Danio rerio OX=7955 GN=mrpl4 PE=2 SV=1	33920	5	mrpl4
sp|Q8JIY8|MK67I_DANRE	0.533583	1.44752	0.175724	sp|Q8JIY8|MK67I_DANRE MKI67 FHA domain-interacting nucleolar phosphoprotein OS=Danio rerio OX=7955 GN=nifk PE=2 SV=2	30099	2	nifk
tr|A0A2R8PV63|A0A2R8PV63_DANRE	0.532888	1.44682	0.155151	tr|A0A2R8PV63|A0A2R8PV63_DANRE MAGUK p55 scaffold protein 3a OS=Danio rerio OX=7955 GN=mpp3a PE=3 SV=1	65595	9	mpp3a
tr|A0A0R4IWR5|A0A0R4IWR5_DANRE	0.532265	1.4462	0.0688206	tr|A0A0R4IWR5|A0A0R4IWR5_DANRE Tensin 1a OS=Danio rerio OX=7955 GN=tns1a PE=3 SV=2	180428	34	tns1a
tr|A0A0G2KSV9|A0A0G2KSV9_DANRE	0.531625	1.44556	0.0640807	tr|A0A0G2KSV9|A0A0G2KSV9_DANRE MIF4G domain-containing protein OS=Danio rerio OX=7955 PE=1 SV=1	108554	18	Uncharacterized protein
tr|C5J7W5|C5J7W5_DANRE	0.531376	1.44531	0.237057	tr|C5J7W5|C5J7W5_DANRE UPF2 regulator of nonsense transcripts homolog (Yeast) (Fragment) OS=Danio rerio OX=7955 GN=upf2 PE=2 SV=1	118048	12	upf2
tr|A8WGL5|A8WGL5_DANRE	0.531325	1.44526	0.195866	tr|A8WGL5|A8WGL5_DANRE Zgc:103654 OS=Danio rerio OX=7955 GN=dhrs13a.1 PE=2 SV=1	32405	10	dhrs13a.1
tr|Q1LWB7|Q1LWB7_DANRE	0.530792	1.44472	0.154063	tr|Q1LWB7|Q1LWB7_DANRE Novel protein similar to vertebrate early endosome antigen 1, 162kD (EEA1) (Fragment) OS=Danio rerio OX=7955 GN=CH211-276P10.2-001 PE=4 SV=1	153829	4	CH211-276P10.2-001
tr|A0A2R8RWC3|A0A2R8RWC3_DANRE	0.530731	1.44466	0.218499	tr|A0A2R8RWC3|A0A2R8RWC3_DANRE O-GlcNAcase OS=Danio rerio OX=7955 GN=oga PE=1 SV=1	105653	10	oga
tr|F1QLJ9|F1QLJ9_DANRE	0.530334	1.44426	0.0543325	tr|F1QLJ9|F1QLJ9_DANRE WD repeat domain phosphoinositide-interacting protein 2 OS=Danio rerio OX=7955 GN=wipi2 PE=1 SV=1	46607	2	wipi2
sp|Q6PBH5|NDUA4_DANRE	0.529443	1.44337	0.173324	sp|Q6PBH5|NDUA4_DANRE Cytochrome c oxidase subunit NDUFA4 OS=Danio rerio OX=7955 GN=ndufa4 PE=3 SV=1	9417	8	ndufa4
tr|E7FGL2|E7FGL2_DANRE	0.529313	1.44324	0.0680472	tr|E7FGL2|E7FGL2_DANRE ADP-ribosylation factor guanine nucleotide-exchange factor 1 (brefeldin A-inhibited) OS=Danio rerio OX=7955 GN=arfgef1 PE=1 SV=1	208484	22	arfgef1
sp|Q7ZVR6|MYNN_DANRE	0.529025	1.44295	0.31565	sp|Q7ZVR6|MYNN_DANRE Myoneurin OS=Danio rerio OX=7955 GN=mynn PE=2 SV=1	91120	6	mynn
tr|A0A140LG36|A0A140LG36_DANRE	0.528471	1.4424	0.0579862	tr|A0A140LG36|A0A140LG36_DANRE PHD finger protein 6 (Fragment) OS=Danio rerio OX=7955 GN=phf6 PE=1 SV=1	26622	2	phf6
tr|A5PF33|A5PF33_DANRE	0.528157	1.44209	0.0566141	tr|A5PF33|A5PF33_DANRE Tbl1x receptor 1a OS=Danio rerio OX=7955 GN=tbl1xr1a PE=1 SV=1	55648	4	tbl1xr1a
tr|D2XMV0|D2XMV0_DANRE	0.527506	1.44144	0.138226	tr|D2XMV0|D2XMV0_DANRE Protein tyrosine kinase 7 long isoform (Fragment) OS=Danio rerio OX=7955 GN=ptk7b PE=2 SV=1	65575	3	ptk7b
tr|Q32LQ7|Q32LQ7_DANRE	0.526999	1.44093	0.329264	tr|Q32LQ7|Q32LQ7_DANRE Clat_adaptor_s domain-containing protein (Fragment) OS=Danio rerio OX=7955 GN=zgc:162858 PE=2 SV=1	21610	4	zgc:162858
tr|F1QS78|F1QS78_DANRE	0.526453	1.44038	0.149097	tr|F1QS78|F1QS78_DANRE Glutamate receptor OS=Danio rerio OX=7955 GN=LOC110438919 PE=3 SV=3	160341	5	LOC110438919
sp|Q6NVJ5|DI2BA_DANRE	0.525003	1.43894	0.210362	sp|Q6NVJ5|DI2BA_DANRE Disco-interacting protein 2 homolog B-A OS=Danio rerio OX=7955 GN=dip2ba PE=2 SV=1	171678	15	dip2ba
tr|E7EY65|E7EY65_DANRE	0.524022	1.43796	0.0766421	tr|E7EY65|E7EY65_DANRE Metastasis-associated 1 family, member 3 OS=Danio rerio OX=7955 GN=mta3 PE=1 SV=1	80058	9	mta3
sp|Q566R7|DS22B_DANRE	0.523664	1.4376	0.120794	sp|Q566R7|DS22B_DANRE Dual specificity protein phosphatase 22-B OS=Danio rerio OX=7955 GN=dusp22b PE=2 SV=2	20631	1	dusp22b
tr|F1Q5N2|F1Q5N2_DANRE	0.522797	1.43674	0.0496033	tr|F1Q5N2|F1Q5N2_DANRE Non-specific serine/threonine protein kinase OS=Danio rerio OX=7955 GN=mark4a PE=3 SV=3	80931	3	mark4a
sp|Q5TYW4|NBAS_DANRE	0.521882	1.43583	0.261661	sp|Q5TYW4|NBAS_DANRE NBAS subunit of NRZ tethering complex OS=Danio rerio OX=7955 GN=nbas PE=2 SV=1	267981	10	nbas
sp|Q5RG82|NS1BA_DANRE	0.521868	1.43581	0.220687	sp|Q5RG82|NS1BA_DANRE Influenza virus NS1A-binding protein homolog A OS=Danio rerio OX=7955 GN=ivns1abpa PE=2 SV=1	71687	4	ivns1abpa
tr|E7F8Y4|E7F8Y4_DANRE	0.51939	1.43335	0.143524	tr|E7F8Y4|E7F8Y4_DANRE Splicing factor U2AF subunit OS=Danio rerio OX=7955 GN=u2af2a PE=1 SV=3	52854	2	u2af2a
tr|E7F723|E7F723_DANRE	0.517851	1.43182	0.335073	tr|E7F723|E7F723_DANRE Non-specific serine/threonine protein kinase OS=Danio rerio OX=7955 GN=mast2 PE=3 SV=1	211607	9	mast2
tr|B1WB52|B1WB52_DANRE	0.516742	1.43072	0.0602998	tr|B1WB52|B1WB52_DANRE Zgc:171844 OS=Danio rerio OX=7955 GN=zgc:171844 PE=2 SV=1	22616	3	zgc:171844
tr|A0A0R4IAZ9|A0A0R4IAZ9_DANRE	0.51666	1.43064	0.0132985	tr|A0A0R4IAZ9|A0A0R4IAZ9_DANRE SEC24 homolog C, COPII coat complex component OS=Danio rerio OX=7955 GN=sec24c PE=1 SV=1	140550	18	sec24c
tr|B8A4B0|B8A4B0_DANRE	0.516342	1.43032	0.212242	tr|B8A4B0|B8A4B0_DANRE Glutamate dehydrogenase (NAD(P)(+)) OS=Danio rerio OX=7955 GN=glud1a PE=1 SV=1	60141	5	glud1a
tr|B8JLJ7|B8JLJ7_DANRE	0.514816	1.42881	0.218834	tr|B8JLJ7|B8JLJ7_DANRE Guanine nucleotide-binding protein (G protein), q polypeptide OS=Danio rerio OX=7955 GN=gnaq PE=3 SV=1	42155	7	gnaq
tr|Q6NY41|Q6NY41_DANRE	0.514395	1.42839	0.368505	tr|Q6NY41|Q6NY41_DANRE Cytochrome b5 type B OS=Danio rerio OX=7955 GN=cyb5b PE=2 SV=1	17584	3	cyb5b
tr|U3JAF0|U3JAF0_DANRE	0.513668	1.42768	0.218161	tr|U3JAF0|U3JAF0_DANRE Ubiquitin-specific peptidase 54b (Fragment) OS=Danio rerio OX=7955 GN=usp54b PE=4 SV=1	82692	2	usp54b
tr|Q499A5|Q499A5_DANRE	0.513472	1.42748	0.137063	tr|Q499A5|Q499A5_DANRE Zgc:153813 protein (Fragment) OS=Danio rerio OX=7955 GN=zgc:153813 PE=2 SV=1	99798	7	zgc:153813
tr|Q6IQT6|Q6IQT6_DANRE	0.513218	1.42723	0.103091	tr|Q6IQT6|Q6IQT6_DANRE Bet1 golgi vesicular membrane-trafficking protein OS=Danio rerio OX=7955 GN=bet1 PE=1 SV=1	12697	1	bet1
tr|A0JMJ4|A0JMJ4_DANRE	0.513049	1.42706	0.029152	tr|A0JMJ4|A0JMJ4_DANRE LOC565308 protein (Fragment) OS=Danio rerio OX=7955 GN=zfyve21 PE=2 SV=1	26102	1	zfyve21
sp|Q9W7R4|TEN3_DANRE	0.512395	1.42642	0.00117607	sp|Q9W7R4|TEN3_DANRE Teneurin-3 OS=Danio rerio OX=7955 GN=tenm3 PE=2 SV=2	300669	36	tenm3
sp|Q6DRJ9|RIC8B_DANRE	0.511846	1.42587	0.282556	sp|Q6DRJ9|RIC8B_DANRE Synembryn-B OS=Danio rerio OX=7955 GN=ric8b PE=2 SV=1	59522	6	ric8b
tr|A0A2R8QFG7|A0A2R8QFG7_DANRE	0.51134	1.42537	0.148555	tr|A0A2R8QFG7|A0A2R8QFG7_DANRE AT-rich interactive domain 1Ab (SWI-like) OS=Danio rerio OX=7955 GN=arid1ab PE=1 SV=1	235560	9	arid1ab
tr|A0A0R4II16|A0A0R4II16_DANRE	0.510051	1.4241	0.255861	tr|A0A0R4II16|A0A0R4II16_DANRE Proteasome inhibitor PI31 subunit OS=Danio rerio OX=7955 GN=psmf1 PE=1 SV=1	29747	8	psmf1
tr|A8WGB0|A8WGB0_DANRE	0.509645	1.4237	0.0762017	tr|A8WGB0|A8WGB0_DANRE Glycerol kinase OS=Danio rerio OX=7955 GN=zgc:172295 PE=2 SV=1	58191	14	zgc:172295
tr|Q8JIZ1|Q8JIZ1_DANRE	0.509623	1.42368	0.616242	tr|Q8JIZ1|Q8JIZ1_DANRE Ribonuclease H OS=Danio rerio OX=7955 GN=gag/pol PE=3 SV=1	249953	12	gag/pol
tr|A0A0R4IUB2|A0A0R4IUB2_DANRE	0.508758	1.42282	0.156851	tr|A0A0R4IUB2|A0A0R4IUB2_DANRE Ankyrin repeat and KH domain-containing 1 OS=Danio rerio OX=7955 GN=ankhd1 PE=1 SV=2	272403	15	ankhd1
tr|A0A0G2LAX4|A0A0G2LAX4_DANRE	0.507511	1.4216	0.24126	tr|A0A0G2LAX4|A0A0G2LAX4_DANRE Trafficking protein particle complex subunit 10 (Fragment) OS=Danio rerio OX=7955 GN=trappc10 PE=1 SV=2	83378	2	trappc10
tr|E7FC09|E7FC09_DANRE	0.507464	1.42155	0.0185799	tr|E7FC09|E7FC09_DANRE Cysteinyl-tRNA synthetase OS=Danio rerio OX=7955 GN=cars2 PE=1 SV=1	63935	4	cars2
tr|A5PN62|A5PN62_DANRE	0.507082	1.42117	0.0435173	tr|A5PN62|A5PN62_DANRE Dimethylargininase OS=Danio rerio OX=7955 GN=ddah2 PE=1 SV=1	31054	9	ddah2
sp|Q7ZV82|RL27_DANRE	0.506867	1.42096	0.0658637	sp|Q7ZV82|RL27_DANRE 60S ribosomal protein L27 OS=Danio rerio OX=7955 GN=rpl27 PE=2 SV=3	15782	6	rpl27
tr|F1Q949|F1Q949_DANRE	0.506749	1.42085	0.258442	tr|F1Q949|F1Q949_DANRE Cleavage and polyadenylation specificity factor subunit 4 OS=Danio rerio OX=7955 GN=cpsf4 PE=1 SV=1	30782	5	cpsf4
tr|Q6PC41|Q6PC41_DANRE	0.506744	1.42084	0.0731111	tr|Q6PC41|Q6PC41_DANRE Histone deacetylase complex subunit SAP18 OS=Danio rerio OX=7955 GN=sap18 PE=1 SV=1	17524	5	sap18
tr|A0A0R4I9E2|A0A0R4I9E2_DANRE	0.506469	1.42057	0.172261	tr|A0A0R4I9E2|A0A0R4I9E2_DANRE Calcium channel, voltage-dependent, R type, alpha 1E subunit a OS=Danio rerio OX=7955 GN=cacna1ea PE=3 SV=2	203843	4	cacna1ea
tr|F1QP17|F1QP17_DANRE	0.505528	1.41964	0.00260522	tr|F1QP17|F1QP17_DANRE Mitochondrial ribosomal protein S9 OS=Danio rerio OX=7955 GN=mrps9 PE=1 SV=1	44259	1	mrps9
tr|F1QU14|F1QU14_DANRE	0.505267	1.41939	0.310137	tr|F1QU14|F1QU14_DANRE Si:dkey-21e2.12 OS=Danio rerio OX=7955 GN=si:dkey-21e2.12 PE=4 SV=3	30420	2	si:dkey-21e2.12
tr|F1R6Y1|F1R6Y1_DANRE	0.504911	1.41904	0.237612	tr|F1R6Y1|F1R6Y1_DANRE Cyclin-dependent kinase 12 OS=Danio rerio OX=7955 GN=cdk12 PE=1 SV=1	139710	5	cdk12
tr|A0A0R4IVP6|A0A0R4IVP6_DANRE	0.504846	1.41897	0.26712	tr|A0A0R4IVP6|A0A0R4IVP6_DANRE Small G protein-signaling modulator 2 OS=Danio rerio OX=7955 GN=sgsm2 PE=4 SV=3	119686	4	sgsm2
tr|M4MD44|M4MD44_DANRE	0.504788	1.41891	0.087389	tr|M4MD44|M4MD44_DANRE Non-specific serine/threonine protein kinase OS=Danio rerio OX=7955 GN=akt1 PE=1 SV=1	54844	4	akt1
tr|E7F6X2|E7F6X2_DANRE	0.50473	1.41886	0.180191	tr|E7F6X2|E7F6X2_DANRE Vitamin-K-epoxide reductase (warfarin-sensitive) OS=Danio rerio OX=7955 GN=vkorc1 PE=1 SV=1	18845	2	vkorc1
tr|A0A286YBY1|A0A286YBY1_DANRE	0.504531	1.41866	0.132047	tr|A0A286YBY1|A0A286YBY1_DANRE RING-type E3 ubiquitin transferase OS=Danio rerio OX=7955 GN=trim67 PE=4 SV=2	77921	8	trim67
tr|A0A2R8Q359|A0A2R8Q359_DANRE	0.502531	1.4167	0.29356	tr|A0A2R8Q359|A0A2R8Q359_DANRE EMAP-like 1 OS=Danio rerio OX=7955 GN=eml1 PE=3 SV=1	88370	13	eml1
tr|A0A0R4IJL5|A0A0R4IJL5_DANRE	0.50241	1.41658	0.0749318	tr|A0A0R4IJL5|A0A0R4IJL5_DANRE Membrane-bound O-acyltransferase domain-containing 2b OS=Danio rerio OX=7955 GN=mboat2b PE=4 SV=2	56503	7	mboat2b
tr|F6NW08|F6NW08_DANRE	0.501103	1.41529	0.287975	tr|F6NW08|F6NW08_DANRE Si:ch211-13c6.2 OS=Danio rerio OX=7955 GN=si:ch211-13c6.2 PE=1 SV=1	93073	5	si:ch211-13c6.2
tr|Q5RG40|Q5RG40_DANRE	0.500303	1.41451	0.086693	tr|Q5RG40|Q5RG40_DANRE Tumor necrosis factor, alpha-induced protein 2a OS=Danio rerio OX=7955 GN=tnfaip2a PE=3 SV=1	81522	14	tnfaip2a
tr|Q6NSN6|Q6NSN6_DANRE	0.4996	1.41382	0.256686	tr|Q6NSN6|Q6NSN6_DANRE Serine/threonine-protein phosphatase OS=Danio rerio OX=7955 GN=ppp1caa PE=1 SV=1	37361	5	ppp1caa
tr|Q90WA5|Q90WA5_DANRE	0.499491	1.41371	0.0143417	tr|Q90WA5|Q90WA5_DANRE Protein disulfide-isomerase A6 OS=Danio rerio OX=7955 GN=pdia6 PE=1 SV=1	48008	11	pdia6
tr|E7FAU0|E7FAU0_DANRE	0.498635	1.41288	0.333694	tr|E7FAU0|E7FAU0_DANRE E3 ubiquitin-protein ligase Midline-1 OS=Danio rerio OX=7955 GN=mid1 PE=4 SV=3	74703	4	mid1
tr|Q7T303|Q7T303_DANRE	0.498633	1.41287	0.0502367	tr|Q7T303|Q7T303_DANRE Calponin OS=Danio rerio OX=7955 GN=cnn3a PE=1 SV=1	36710	5	cnn3a
tr|F1RDR2|F1RDR2_DANRE	0.498615	1.41286	0.0304239	tr|F1RDR2|F1RDR2_DANRE Mitochondrial ribosomal protein S27 OS=Danio rerio OX=7955 GN=mrps27 PE=1 SV=1	46005	6	mrps27
tr|A8KBY7|A8KBY7_DANRE	0.498593	1.41283	0.0405569	tr|A8KBY7|A8KBY7_DANRE Phosphoglycerate mutase OS=Danio rerio OX=7955 GN=bpgm PE=2 SV=1	29755	8	bpgm
tr|A0A2R8QKS2|A0A2R8QKS2_DANRE	0.498037	1.41229	0.622955	tr|A0A2R8QKS2|A0A2R8QKS2_DANRE Retinal Mueller cells isomerohydrolase OS=Danio rerio OX=7955 GN=rpe65c PE=3 SV=1	60773	2	rpe65c
tr|Q7SXK8|Q7SXK8_DANRE	0.497194	1.41147	0.276327	tr|Q7SXK8|Q7SXK8_DANRE DnaJ (Hsp40) homolog, subfamily A, member 3B OS=Danio rerio OX=7955 GN=dnaja3b PE=2 SV=1	52539	7	dnaja3b
sp|F1QJX5|UBR3_DANRE	0.496606	1.41089	0.0447312	sp|F1QJX5|UBR3_DANRE E3 ubiquitin-protein ligase ubr3 OS=Danio rerio OX=7955 GN=ubr3 PE=2 SV=2	210579	5	ubr3
tr|A0A0R4IG81|A0A0R4IG81_DANRE	0.496345	1.41064	0.0304637	tr|A0A0R4IG81|A0A0R4IG81_DANRE Calpain 1, (mu/I) large subunit b OS=Danio rerio OX=7955 GN=capn1b PE=1 SV=2	80166	16	capn1b
tr|E3NZ06|E3NZ06_DANRE	0.496196	1.41049	0.0601916	tr|E3NZ06|E3NZ06_DANRE 10-formyltetrahydrofolate dehydrogenase OS=Danio rerio OX=7955 GN=aldh1l1 PE=1 SV=1	100155	23	aldh1l1
tr|E7FA12|E7FA12_DANRE	0.495977	1.41028	0.0236383	tr|E7FA12|E7FA12_DANRE Trafficking protein particle complex subunit 8 OS=Danio rerio OX=7955 GN=trappc8 PE=1 SV=1	164446	21	trappc8
tr|F1QLZ5|F1QLZ5_DANRE	0.495536	1.40984	0.204244	tr|F1QLZ5|F1QLZ5_DANRE SIN3-HDAC complex-associated factor,-like OS=Danio rerio OX=7955 GN=sinhcafl PE=1 SV=2	46737	7	sinhcafl
tr|A0A2R8QDV2|A0A2R8QDV2_DANRE	0.49533	1.40964	0.239782	tr|A0A2R8QDV2|A0A2R8QDV2_DANRE Cystatin 14b, tandem duplicate 1 OS=Danio rerio OX=7955 GN=cst14b.1 PE=1 SV=1	11195	1	cst14b.1
tr|A7MBT1|A7MBT1_DANRE	0.494909	1.40923	0.321052	tr|A7MBT1|A7MBT1_DANRE Glypican 6a OS=Danio rerio OX=7955 GN=gpc6a PE=2 SV=1	63496	5	gpc6a
sp|Q1LY51|ZN704_DANRE	0.493542	1.4079	0.205433	sp|Q1LY51|ZN704_DANRE Zinc finger protein 704 OS=Danio rerio OX=7955 GN=znf704 PE=3 SV=2	54294	5	znf704
tr|F1Q7I7|F1Q7I7_DANRE	0.493225	1.40759	0.266512	tr|F1Q7I7|F1Q7I7_DANRE Cyclin and CBS domain divalent metal cation transport mediator 4b OS=Danio rerio OX=7955 GN=cnnm4b PE=1 SV=2	87102	7	cnnm4b
sp|Q6P6X9|NUP35_DANRE	0.492938	1.40731	0.334939	sp|Q6P6X9|NUP35_DANRE Nucleoporin NUP35 OS=Danio rerio OX=7955 GN=nup35 PE=1 SV=1	32885	4	nup35
tr|A5WVN8|A5WVN8_DANRE	0.492825	1.4072	0.123383	tr|A5WVN8|A5WVN8_DANRE Si:dkey-238o13.4 OS=Danio rerio OX=7955 GN=si:dkey-238o13.4 PE=1 SV=1	25900	9	si:dkey-238o13.4
tr|F1QC05|F1QC05_DANRE	0.492121	1.40651	0.0195154	tr|F1QC05|F1QC05_DANRE Epoxide hydrolase OS=Danio rerio OX=7955 GN=ephx1 PE=1 SV=1	51968	13	ephx1
tr|A0A0R4IIB3|A0A0R4IIB3_DANRE	0.491391	1.4058	0.328938	tr|A0A0R4IIB3|A0A0R4IIB3_DANRE Neogenin 1a OS=Danio rerio OX=7955 GN=neo1a PE=3 SV=2	154600	18	neo1a
tr|A0A2R8QMW0|A0A2R8QMW0_DANRE	0.490292	1.40473	0.2638	tr|A0A2R8QMW0|A0A2R8QMW0_DANRE Si:ch211-203d1.3 OS=Danio rerio OX=7955 GN=si:ch211-203d1.3 PE=3 SV=1	68948	5	si:ch211-203d1.3
tr|D0EVX4|D0EVX4_DANRE	0.489981	1.40443	0.076669	tr|D0EVX4|D0EVX4_DANRE Neuroligin 4b OS=Danio rerio OX=7955 GN=nlgn4xa PE=2 SV=1	92942	5	nlgn4xa
tr|E7FEV5|E7FEV5_DANRE	0.489944	1.40439	0.174272	tr|E7FEV5|E7FEV5_DANRE Deubiquitinating enzyme CYLD OS=Danio rerio OX=7955 GN=cylda PE=1 SV=1	107168	11	cylda
tr|F1QNX8|F1QNX8_DANRE	0.489872	1.40432	0.385567	tr|F1QNX8|F1QNX8_DANRE WAS/WASL-interacting protein family, member 2b OS=Danio rerio OX=7955 GN=wipf2b PE=4 SV=1	45304	6	wipf2b
sp|Q6DH69|FAH2A_DANRE	0.489041	1.40351	0.0722841	sp|Q6DH69|FAH2A_DANRE Fatty-acid amide hydrolase 2-A OS=Danio rerio OX=7955 GN=faah2a PE=2 SV=1	58093	10	faah2a
tr|A8WG02|A8WG02_DANRE	0.488558	1.40304	0.102335	tr|A8WG02|A8WG02_DANRE Cyclin-dependent kinase 14 OS=Danio rerio OX=7955 GN=cdk14 PE=2 SV=1	36492	3	cdk14
tr|E7F0U4|E7F0U4_DANRE	0.488544	1.40303	0.284111	tr|E7F0U4|E7F0U4_DANRE Ankyrin 1, erythrocytic b OS=Danio rerio OX=7955 GN=ank1b PE=4 SV=3	189606	1	ank1b
sp|A4IG53|COMTB_DANRE	0.487946	1.40245	0.145034	sp|A4IG53|COMTB_DANRE Catechol O-methyltransferase B OS=Danio rerio OX=7955 GN=comtb PE=2 SV=1	29872	9	comtb
sp|A3KPW9|BAG6_DANRE	0.486841	1.40137	0.300531	sp|A3KPW9|BAG6_DANRE Large proline-rich protein BAG6 OS=Danio rerio OX=7955 GN=Bag6 PE=3 SV=1	124121	7	Bag6
tr|E7F5V3|E7F5V3_DANRE	0.486175	1.40073	0.013405	tr|E7F5V3|E7F5V3_DANRE Fatty acid synthase OS=Danio rerio OX=7955 GN=ccdc57 PE=1 SV=2	274192	84	ccdc57
tr|A0JMK7|A0JMK7_DANRE	0.48595	1.40051	0.198909	tr|A0JMK7|A0JMK7_DANRE Zgc:153928 OS=Danio rerio OX=7955 GN=cd99 PE=2 SV=1	22877	1	cd99
tr|F1QHZ4|F1QHZ4_DANRE	0.48592	1.40048	0.297398	tr|F1QHZ4|F1QHZ4_DANRE Prolyl-tRNA synthetase OS=Danio rerio OX=7955 GN=pars2 PE=1 SV=1	53136	2	pars2
sp|Q6GMI7|ENOPH_DANRE	0.485741	1.4003	0.0893688	sp|Q6GMI7|ENOPH_DANRE Enolase-phosphatase E1 OS=Danio rerio OX=7955 GN=enoph1 PE=2 SV=1	29978	12	enoph1
tr|A0A2R8Q5I2|A0A2R8Q5I2_DANRE	0.485471	1.40004	0.0818637	tr|A0A2R8Q5I2|A0A2R8Q5I2_DANRE Vesicle transport through interaction with t-SNAREs 1A OS=Danio rerio OX=7955 GN=vti1a PE=1 SV=1	26053	4	vti1a
tr|F1QWY2|F1QWY2_DANRE	0.485415	1.39999	0.275217	tr|F1QWY2|F1QWY2_DANRE PRP4 pre-mRNA-processing factor 4 homolog OS=Danio rerio OX=7955 GN=prpf4bb PE=1 SV=1	116167	6	prpf4bb
tr|F1QM43|F1QM43_DANRE	0.485365	1.39994	0.238532	tr|F1QM43|F1QM43_DANRE Guanosine-3',5'-bis(diphosphate) 3'-pyrophosphohydrolase MESH1 OS=Danio rerio OX=7955 GN=hddc3 PE=1 SV=1	20386	4	hddc3
tr|B8A5Y8|B8A5Y8_DANRE	0.484884	1.39947	0.0454585	tr|B8A5Y8|B8A5Y8_DANRE Si:dkeyp-123h10.2 OS=Danio rerio OX=7955 GN=gprin3b PE=4 SV=1	63826	9	gprin3b
sp|Q7ZUV2|KTNB1_DANRE	0.484171	1.39878	0.0871101	sp|Q7ZUV2|KTNB1_DANRE Katanin p80 WD40 repeat-containing subunit B1 OS=Danio rerio OX=7955 GN=katnb1 PE=2 SV=1	75995	8	katnb1
sp|Q561X9|BDH2_DANRE	0.483988	1.3986	0.336181	sp|Q561X9|BDH2_DANRE 3-hydroxybutyrate dehydrogenase type 2 OS=Danio rerio OX=7955 GN=bdh2 PE=2 SV=1	26502	7	bdh2
tr|A0A2R8RXW4|A0A2R8RXW4_DANRE	0.483947	1.39856	0.188332	tr|A0A2R8RXW4|A0A2R8RXW4_DANRE G patch domain-containing 8 OS=Danio rerio OX=7955 GN=gpatch8 PE=1 SV=1	156928	11	gpatch8
tr|A8WFY2|A8WFY2_DANRE	0.48359	1.39822	0.431337	tr|A8WFY2|A8WFY2_DANRE Si:ch211-147a11.7 protein OS=Danio rerio OX=7955 GN=lrrc47 PE=2 SV=1	62559	15	lrrc47
tr|A0A0R4IAH0|A0A0R4IAH0_DANRE	0.482475	1.39714	0.145605	tr|A0A0R4IAH0|A0A0R4IAH0_DANRE Histone deacetylase OS=Danio rerio OX=7955 GN=hdac4 PE=1 SV=1	116426	16	hdac4
sp|Q5RGJ6|WASC3_DANRE	0.480317	1.39505	0.164584	sp|Q5RGJ6|WASC3_DANRE WASH complex subunit 3 OS=Danio rerio OX=7955 GN=washc3 PE=2 SV=1	21565	3	washc3
tr|A2BIM5|A2BIM5_DANRE	0.480201	1.39494	0.0225794	tr|A2BIM5|A2BIM5_DANRE Succinate dehydrogenase assembly factor 4, mitochondrial OS=Danio rerio OX=7955 GN=sdhaf4 PE=3 SV=1	11925	2	sdhaf4
tr|B1WB89|B1WB89_DANRE	0.479893	1.39464	0.237341	tr|B1WB89|B1WB89_DANRE Col1a1 protein OS=Danio rerio OX=7955 GN=col1a1a PE=2 SV=1	128043	3	col1a1a
tr|F8W3V9|F8W3V9_DANRE	0.479718	1.39447	0.16641	tr|F8W3V9|F8W3V9_DANRE Cysteine and glycine-rich protein 1a (Fragment) OS=Danio rerio OX=7955 GN=csrp1a PE=1 SV=1	18012	4	csrp1a
tr|Q8UUX0|Q8UUX0_DANRE	0.479668	1.39442	0.018538	tr|Q8UUX0|Q8UUX0_DANRE Non-specific serine/threonine protein kinase OS=Danio rerio OX=7955 GN=akt2 PE=1 SV=1	55502	7	akt2
tr|A0A0R4IFS8|A0A0R4IFS8_DANRE	0.479202	1.39397	0.0177049	tr|A0A0R4IFS8|A0A0R4IFS8_DANRE Si:dkey-182g1.10 OS=Danio rerio OX=7955 GN=si:dkey-182g1.10 PE=4 SV=1	34722	4	si:dkey-182g1.10
sp|Q9MIY4|COX3_DANRE	0.476887	1.39174	0.516172	sp|Q9MIY4|COX3_DANRE Cytochrome c oxidase subunit 3 OS=Danio rerio OX=7955 GN=mt-co3 PE=3 SV=1	29501	1	mt-co3
tr|B0S5N6|B0S5N6_DANRE	0.476707	1.39156	0.0977335	tr|B0S5N6|B0S5N6_DANRE Transporter (Fragment) OS=Danio rerio OX=7955 GN=slc6a8 PE=3 SV=1	71096	1	slc6a8
tr|A0A0R4IXC8|A0A0R4IXC8_DANRE	0.476654	1.39151	0.173196	tr|A0A0R4IXC8|A0A0R4IXC8_DANRE Tubulin beta chain OS=Danio rerio OX=7955 GN=tubb6 PE=1 SV=1	50090	7	tubb6
tr|A2RUZ0|A2RUZ0_DANRE	0.475559	1.39046	0.210878	tr|A2RUZ0|A2RUZ0_DANRE SH2B adaptor protein 1 OS=Danio rerio OX=7955 GN=sh2b1 PE=2 SV=1	96964	4	sh2b1
tr|A5PKT1|A5PKT1_DANRE	0.474986	1.38991	0.250166	tr|A5PKT1|A5PKT1_DANRE Zgc:163009 protein OS=Danio rerio OX=7955 GN=abca5 PE=2 SV=1	185638	8	abca5
tr|F8W268|F8W268_DANRE	0.474803	1.38973	0.255144	tr|F8W268|F8W268_DANRE Ankyrin 3b (Fragment) OS=Danio rerio OX=7955 GN=ank3b PE=4 SV=1	60162	2	ank3b
sp|Q7ZZ25|ATD1A_DANRE	0.474383	1.38932	0.119543	sp|Q7ZZ25|ATD1A_DANRE Outer mitochondrial transmembrane helix translocase OS=Danio rerio OX=7955 GN=atad1a PE=2 SV=2	42580	6	atad1a
tr|A0A2R8Q6E9|A0A2R8Q6E9_DANRE	0.474028	1.38898	0.0868455	tr|A0A2R8Q6E9|A0A2R8Q6E9_DANRE Adhesion G protein-coupled receptor L3.1 OS=Danio rerio OX=7955 GN=adgrl3.1 PE=4 SV=1	167196	19	adgrl3.1
tr|Q6P0D3|Q6P0D3_DANRE	0.472391	1.38741	0.0939641	tr|Q6P0D3|Q6P0D3_DANRE Actin-related protein 2/3 complex subunit 5 OS=Danio rerio OX=7955 GN=arpc5la PE=1 SV=1	16669	3	arpc5la
tr|E7F2B4|E7F2B4_DANRE	0.471127	1.38619	0.0955658	tr|E7F2B4|E7F2B4_DANRE Cysteine-rich protein 3 OS=Danio rerio OX=7955 GN=crip3 PE=4 SV=1	23417	4	crip3
tr|A0A2R8QJ67|A0A2R8QJ67_DANRE	0.470753	1.38583	0.116656	tr|A0A2R8QJ67|A0A2R8QJ67_DANRE FUS RNA-binding protein OS=Danio rerio OX=7955 GN=fus PE=1 SV=1	53019	5	fus
sp|Q9DG12|ARNT2_DANRE	0.469767	1.38489	0.0156472	sp|Q9DG12|ARNT2_DANRE Aryl hydrocarbon receptor nuclear translocator 2 OS=Danio rerio OX=7955 GN=arnt2 PE=1 SV=2	80972	11	arnt2
tr|A0A0R4IZR5|A0A0R4IZR5_DANRE	0.469524	1.38465	0.131927	tr|A0A0R4IZR5|A0A0R4IZR5_DANRE Stromal antigen 2b OS=Danio rerio OX=7955 GN=stag2b PE=1 SV=1	146551	11	stag2b
tr|F1R4G6|F1R4G6_DANRE	0.469462	1.38459	0.199869	tr|F1R4G6|F1R4G6_DANRE Cathepsin H OS=Danio rerio OX=7955 GN=ctsh PE=1 SV=1	37526	1	ctsh
tr|E9QFB6|E9QFB6_DANRE	0.469168	1.38431	0.122337	tr|E9QFB6|E9QFB6_DANRE Si:dkey-190g6.2 OS=Danio rerio OX=7955 GN=si:dkey-190g6.2 PE=3 SV=1	28883	3	si:dkey-190g6.2
tr|F1QTL9|F1QTL9_DANRE	0.468849	1.384	0.149909	tr|F1QTL9|F1QTL9_DANRE Heterogeneous nuclear ribonucleoprotein A0b OS=Danio rerio OX=7955 GN=hnrnpa0b PE=1 SV=1	32487	12	hnrnpa0b
tr|C4P342|C4P342_DANRE	0.467654	1.38286	0.411174	tr|C4P342|C4P342_DANRE Protocadherin-17 OS=Danio rerio OX=7955 GN=pcdh17 PE=2 SV=1	125427	21	pcdh17
tr|A8WFU3|A8WFU3_DANRE	0.466558	1.38181	0.206041	tr|A8WFU3|A8WFU3_DANRE LOC560371 protein (Fragment) OS=Danio rerio OX=7955 GN=abr PE=2 SV=1	59886	6	abr
tr|A0A0H4P4U5|A0A0H4P4U5_DANRE	0.465241	1.38055	0.070334	tr|A0A0H4P4U5|A0A0H4P4U5_DANRE Mitochondrial fission 1 protein OS=Danio rerio OX=7955 GN=fis1 PE=2 SV=1	15525	4	fis1
tr|A0A2R8Q5G0|A0A2R8Q5G0_DANRE	0.464465	1.37981	0.268947	tr|A0A2R8Q5G0|A0A2R8Q5G0_DANRE Non-specific protein-tyrosine kinase OS=Danio rerio OX=7955 GN=ptk2ab PE=1 SV=1	122968	5	ptk2ab
tr|A0A0R4IVV5|A0A0R4IVV5_DANRE	0.463371	1.37876	0.301145	tr|A0A0R4IVV5|A0A0R4IVV5_DANRE Squalene synthase OS=Danio rerio OX=7955 GN=fdft1 PE=3 SV=1	47177	10	fdft1
tr|Q6P0C0|Q6P0C0_DANRE	0.462708	1.37813	0.0828357	tr|Q6P0C0|Q6P0C0_DANRE StAR-related lipid transfer (START) domain-containing 10 OS=Danio rerio OX=7955 GN=stard10 PE=1 SV=1	31565	7	stard10
tr|A0A0R4IGV2|A0A0R4IGV2_DANRE	0.462628	1.37805	0.0533931	tr|A0A0R4IGV2|A0A0R4IGV2_DANRE PTPRF-interacting protein alpha 4 OS=Danio rerio OX=7955 GN=ppfia4 PE=3 SV=2	135704	16	ppfia4
sp|A1L252|RANB9_DANRE	0.462582	1.37801	0.15846	sp|A1L252|RANB9_DANRE Ran-binding protein 9 OS=Danio rerio OX=7955 GN=ranbp9 PE=2 SV=1	65582	11	ranbp9
tr|Q502B9|Q502B9_DANRE	0.462529	1.37795	0.394879	tr|Q502B9|Q502B9_DANRE ATP-dependent Clp protease proteolytic subunit OS=Danio rerio OX=7955 GN=clpp PE=2 SV=1	28939	5	clpp
tr|E7EXC4|E7EXC4_DANRE	0.462328	1.37776	0.170297	tr|E7EXC4|E7EXC4_DANRE Serpin peptidase inhibitor, clade B (ovalbumin), member 14 OS=Danio rerio OX=7955 GN=serpinb14 PE=1 SV=3	48944	9	serpinb14
tr|F6NMZ4|F6NMZ4_DANRE	0.46143	1.37691	0.106135	tr|F6NMZ4|F6NMZ4_DANRE Si:dkeyp-113d7.10 OS=Danio rerio OX=7955 GN=si:dkeyp-113d7.10 PE=1 SV=1	52229	1	si:dkeyp-113d7.10
sp|A3KP37|NDUF5_DANRE	0.460721	1.37623	0.131799	sp|A3KP37|NDUF5_DANRE Arginine-hydroxylase NDUFAF5, mitochondrial OS=Danio rerio OX=7955 GN=ndufaf5 PE=2 SV=1	35928	5	ndufaf5
tr|A0A0R4IBX9|A0A0R4IBX9_DANRE	0.460231	1.37576	0.568988	tr|A0A0R4IBX9|A0A0R4IBX9_DANRE Si:ch73-1a9.3 OS=Danio rerio OX=7955 GN=si:ch73-1a9.3 PE=3 SV=1	9647	1	si:ch73-1a9.3
tr|Q05AN2|Q05AN2_DANRE	0.460052	1.37559	0.346981	tr|Q05AN2|Q05AN2_DANRE Mitochondrial ribosomal protein L21 OS=Danio rerio OX=7955 GN=mrpl21 PE=1 SV=1	23733	6	mrpl21
tr|A0A2R8Q720|A0A2R8Q720_DANRE	0.46004	1.37558	0.0306428	tr|A0A2R8Q720|A0A2R8Q720_DANRE Filamin A, alpha (actin binding protein 280) OS=Danio rerio OX=7955 GN=flna PE=1 SV=1	271722	64	flna
tr|F1QVQ3|F1QVQ3_DANRE	0.460026	1.37557	0.379278	tr|F1QVQ3|F1QVQ3_DANRE Tumor protein p53-inducible protein 11 OS=Danio rerio OX=7955 GN=tp53i11b PE=1 SV=1	21291	2	tp53i11b
tr|A0A2R8Q4S5|A0A2R8Q4S5_DANRE	0.459544	1.37511	0.269385	tr|A0A2R8Q4S5|A0A2R8Q4S5_DANRE AarF domain containing kinase 2 OS=Danio rerio OX=7955 GN=adck2 PE=3 SV=1	68307	8	adck2
sp|Q1JPY8|PSPC1_DANRE	0.459158	1.37474	0.165194	sp|Q1JPY8|PSPC1_DANRE Paraspeckle component 1 OS=Danio rerio OX=7955 GN=pspc1 PE=2 SV=1	57698	12	pspc1
sp|Q803Z2|YIPF3_DANRE	0.458243	1.37387	0.0625097	sp|Q803Z2|YIPF3_DANRE Protein YIPF3 OS=Danio rerio OX=7955 GN=yipf3 PE=2 SV=1	37858	1	yipf3
tr|A0A0G2KM96|A0A0G2KM96_DANRE	0.457986	1.37362	0.0712746	tr|A0A0G2KM96|A0A0G2KM96_DANRE ATP-sensitive inward rectifier potassium channel 10 OS=Danio rerio OX=7955 GN=LOC100329607 PE=3 SV=2	45693	18	LOC100329607
tr|Q5CZW2|Q5CZW2_DANRE	0.457912	1.37355	0.0141207	tr|Q5CZW2|Q5CZW2_DANRE Uridine phosphorylase OS=Danio rerio OX=7955 GN=upp1 PE=1 SV=1	25725	9	upp1
tr|E7F744|E7F744_DANRE	0.457365	1.37303	0.308777	tr|E7F744|E7F744_DANRE Neuronal pentraxin receptor a (Fragment) OS=Danio rerio OX=7955 GN=nptxra PE=4 SV=2	58557	4	nptxra
tr|A0A0G2L3U3|A0A0G2L3U3_DANRE	0.456786	1.37248	0.0211913	tr|A0A0G2L3U3|A0A0G2L3U3_DANRE Nucleus accumbens-associated 1, BEN and BTB (POZ) domain-containing a OS=Danio rerio OX=7955 GN=nacc1a PE=4 SV=2	58454	11	nacc1a
tr|X1WE77|X1WE77_DANRE	0.456128	1.37185	0.32292	tr|X1WE77|X1WE77_DANRE Microtubule-associated protein OS=Danio rerio OX=7955 GN=maptb PE=1 SV=1	35954	1	maptb
sp|Q803C9|PTSS1_DANRE	0.456078	1.37181	0.0343358	sp|Q803C9|PTSS1_DANRE Phosphatidylserine synthase 1 OS=Danio rerio OX=7955 GN=ptdss1 PE=2 SV=2	54418	5	ptdss1
sp|F1QCV2|HDA10_DANRE	0.455308	1.37108	0.388546	sp|F1QCV2|HDA10_DANRE Polyamine deacetylase HDAC10 OS=Danio rerio OX=7955 GN=hdac10 PE=1 SV=2	74543	8	hdac10
tr|A0A0R4IRC4|A0A0R4IRC4_DANRE	0.453324	1.36919	0.145008	tr|A0A0R4IRC4|A0A0R4IRC4_DANRE Leucine-rich repeat (in FLII)-interacting protein 1b OS=Danio rerio OX=7955 GN=lrrfip1b PE=3 SV=1	59412	9	lrrfip1b
sp|Q4QRK0|MAP11_DANRE	0.453293	1.36916	0.338767	sp|Q4QRK0|MAP11_DANRE Methionine aminopeptidase 1 OS=Danio rerio OX=7955 GN=metap1 PE=2 SV=2	43567	10	metap1
sp|Q1LYB6|ATF1B_DANRE	0.451509	1.36747	0.327277	sp|Q1LYB6|ATF1B_DANRE ATPase inhibitor B, mitochondrial OS=Danio rerio OX=7955 GN=atp5if1b PE=3 SV=1	12191	8	atp5if1b
tr|A0A2R8QDT4|A0A2R8QDT4_DANRE	0.451226	1.3672	0.194486	tr|A0A2R8QDT4|A0A2R8QDT4_DANRE Choline dehydrogenase OS=Danio rerio OX=7955 GN=chdh PE=1 SV=1	71911	9	chdh
tr|B0S5M3|B0S5M3_DANRE	0.451143	1.36712	0.0432309	tr|B0S5M3|B0S5M3_DANRE Oxysterol-binding protein (Fragment) OS=Danio rerio OX=7955 GN=osbpl11 PE=1 SV=1	77991	8	osbpl11
tr|A3KPL8|A3KPL8_DANRE	0.451116	1.3671	0.154766	tr|A3KPL8|A3KPL8_DANRE Craniofacial development protein 1 OS=Danio rerio OX=7955 GN=cfdp1 PE=1 SV=1	35191	1	cfdp1
tr|Q8JFT4|Q8JFT4_DANRE	0.451116	1.3671	0.0370593	tr|Q8JFT4|Q8JFT4_DANRE Novel protein similar to human intersectin (SH3 domain protein, ITSN1) OS=Danio rerio OX=7955 GN=dZ173A8.1-001 PE=4 SV=1	194116	1	dZ173A8.1-001
tr|F1QAA1|F1QAA1_DANRE	0.4503	1.36632	0.469635	tr|F1QAA1|F1QAA1_DANRE Protocadherin 7a OS=Danio rerio OX=7955 GN=pcdh7a PE=4 SV=2	143865	9	pcdh7a
tr|F1R8B4|F1R8B4_DANRE	0.450221	1.36625	0.0975337	tr|F1R8B4|F1R8B4_DANRE GCN1 activator of EIF2AK4 OS=Danio rerio OX=7955 GN=gcn1 PE=1 SV=3	281316	1	gcn1
tr|Q7SXX4|Q7SXX4_DANRE	0.450187	1.36622	0.15615	tr|Q7SXX4|Q7SXX4_DANRE Hippocalcin-like 1 OS=Danio rerio OX=7955 GN=hpcal1 PE=2 SV=1	22379	3	hpcal1
tr|F8W4C1|F8W4C1_DANRE	0.449785	1.36584	0.360649	tr|F8W4C1|F8W4C1_DANRE Myelin basic protein OS=Danio rerio OX=7955 GN=mbpb PE=1 SV=1	13113	7	mbpb
tr|A1L1S8|A1L1S8_DANRE	0.449513	1.36558	0.473573	tr|A1L1S8|A1L1S8_DANRE Zgc:158312 OS=Danio rerio OX=7955 GN=mogs PE=2 SV=1	96224	14	mogs
tr|Q90XP6|Q90XP6_DANRE	0.449279	1.36536	0.289388	tr|Q90XP6|Q90XP6_DANRE Glutamate receptor OS=Danio rerio OX=7955 GN=gria2b PE=2 SV=1	100335	1	gria2b
sp|Q6PEI7|PYRG1_DANRE	0.449066	1.36516	0.46945	sp|Q6PEI7|PYRG1_DANRE CTP synthase 1 OS=Danio rerio OX=7955 GN=ctps1 PE=1 SV=1	66595	13	ctps1
tr|F8W5H1|F8W5H1_DANRE	0.448551	1.36467	0.193418	tr|F8W5H1|F8W5H1_DANRE Myotubularin OS=Danio rerio OX=7955 GN=mtm1 PE=1 SV=2	73574	6	mtm1
tr|Q7SXM1|Q7SXM1_DANRE	0.448503	1.36462	0.112537	tr|Q7SXM1|Q7SXM1_DANRE Cytochrome c oxidase subunit OS=Danio rerio OX=7955 GN=cox6b2 PE=1 SV=1	10087	6	cox6b2
sp|Q6IQ86|BRK1_DANRE	0.448447	1.36457	0.171724	sp|Q6IQ86|BRK1_DANRE Probable protein BRICK1 OS=Danio rerio OX=7955 GN=brk1 PE=3 SV=1	8731	5	brk1
tr|A7MD57|A7MD57_DANRE	0.448417	1.36454	0.220193	tr|A7MD57|A7MD57_DANRE DCN1-like protein OS=Danio rerio OX=7955 GN=dcun1d3 PE=2 SV=1	33297	6	dcun1d3
sp|Q0P451|COA5_DANRE	0.44822	1.36436	0.149877	sp|Q0P451|COA5_DANRE Cytochrome c oxidase assembly factor 5 OS=Danio rerio OX=7955 GN=coa5 PE=3 SV=1	8752	2	coa5
tr|A0A0R4IEB5|A0A0R4IEB5_DANRE	0.448096	1.36424	0.156669	tr|A0A0R4IEB5|A0A0R4IEB5_DANRE ATCAY kinesin light chain-interacting caytaxin b OS=Danio rerio OX=7955 GN=atcayb PE=4 SV=1	38362	5	atcayb
sp|Q7SXT7|ZC21A_DANRE	0.446868	1.36308	0.141979	sp|Q7SXT7|ZC21A_DANRE Zinc finger C2HC domain-containing protein 1A OS=Danio rerio OX=7955 GN=zc2hc1a PE=2 SV=1	35849	10	zc2hc1a
tr|A9JTC4|A9JTC4_DANRE	0.44685	1.36306	0.251041	tr|A9JTC4|A9JTC4_DANRE Mediator of ErbB2-driven cell motility 1 OS=Danio rerio OX=7955 GN=memo1 PE=1 SV=1	33465	7	memo1
tr|Q6PBQ4|Q6PBQ4_DANRE	0.446365	1.3626	0.00929057	tr|Q6PBQ4|Q6PBQ4_DANRE Reticulon OS=Danio rerio OX=7955 GN=rtn1a PE=1 SV=1	23053	3	rtn1a
tr|A8WHQ0|A8WHQ0_DANRE	0.445884	1.36215	0.338478	tr|A8WHQ0|A8WHQ0_DANRE Poly(rC)-binding protein 3 OS=Danio rerio OX=7955 GN=pcbp3 PE=1 SV=1	36486	7	pcbp3
tr|Q7ZUK9|Q7ZUK9_DANRE	0.445829	1.3621	0.104671	tr|Q7ZUK9|Q7ZUK9_DANRE Regulation of nuclear pre-mRNA domain-containing 1B OS=Danio rerio OX=7955 GN=rprd1b PE=1 SV=1	38109	8	rprd1b
sp|Q32LU7|PTCD3_DANRE	0.445621	1.3619	0.0843817	sp|Q32LU7|PTCD3_DANRE Pentatricopeptide repeat domain-containing protein 3, mitochondrial OS=Danio rerio OX=7955 GN=ptcd3 PE=2 SV=1	76005	10	ptcd3
tr|F6P528|F6P528_DANRE	0.445621	1.3619	0.0827299	tr|F6P528|F6P528_DANRE Transmembrane protein 209 OS=Danio rerio OX=7955 GN=tmem209 PE=1 SV=1	61846	5	tmem209
tr|Q7T361|Q7T361_DANRE	0.445316	1.36161	0.230493	tr|Q7T361|Q7T361_DANRE Stx8 protein OS=Danio rerio OX=7955 GN=stx8 PE=1 SV=1	26096	2	stx8
tr|A0A2R8Q899|A0A2R8Q899_DANRE	0.445273	1.36157	0.448584	tr|A0A2R8Q899|A0A2R8Q899_DANRE Death inducer-obliterator 1 OS=Danio rerio OX=7955 GN=dido1 PE=1 SV=1	294209	12	dido1
tr|A2RV26|A2RV26_DANRE	0.445204	1.36151	0.0772808	tr|A2RV26|A2RV26_DANRE Kinesin-like protein (Fragment) OS=Danio rerio OX=7955 GN=LOC100149074 PE=2 SV=1	61126	4	LOC100149074
tr|A0A2R8Q8S3|A0A2R8Q8S3_DANRE	0.44516	1.36146	0.284281	tr|A0A2R8Q8S3|A0A2R8Q8S3_DANRE SPARC (osteonectin), cwcv and kazal-like domains proteoglycan 2 OS=Danio rerio OX=7955 GN=spock2 PE=4 SV=1	47037	1	spock2
tr|Q6ZM83|Q6ZM83_DANRE	0.444801	1.36113	0.339792	tr|Q6ZM83|Q6ZM83_DANRE PiggyBac transposable element-derived 5 OS=Danio rerio OX=7955 GN=pgbd5 PE=4 SV=3	58682	10	pgbd5
tr|Q4KMD0|Q4KMD0_DANRE	0.444041	1.36041	0.0561536	tr|Q4KMD0|Q4KMD0_DANRE Coronin OS=Danio rerio OX=7955 GN=coro7 PE=2 SV=1	100768	5	coro7
tr|F1QJ48|F1QJ48_DANRE	0.443978	1.36035	0.210813	tr|F1QJ48|F1QJ48_DANRE Mitochondrial ribosome recycling factor OS=Danio rerio OX=7955 GN=mrrf PE=1 SV=1	28426	4	mrrf
tr|F2Z4T1|F2Z4T1_DANRE	0.443705	1.36009	0.442548	tr|F2Z4T1|F2Z4T1_DANRE Transcription initiation factor IIF subunit alpha OS=Danio rerio OX=7955 GN=gtf2f1 PE=1 SV=1	48996	10	gtf2f1
tr|A0A0R4IN46|A0A0R4IN46_DANRE	0.443237	1.35965	0.236705	tr|A0A0R4IN46|A0A0R4IN46_DANRE Transglutaminase 1-like 1 (Fragment) OS=Danio rerio OX=7955 GN=tgm1l1 PE=1 SV=1	90803	5	tgm1l1
tr|Q5TZ76|Q5TZ76_DANRE	0.442891	1.35933	0.347242	tr|Q5TZ76|Q5TZ76_DANRE Cytochrome P450, family 2, subfamily P, polypeptide 6 OS=Danio rerio OX=7955 GN=cyp2p6 PE=1 SV=1	60755	3	cyp2p6
tr|A0A2R8QMV9|A0A2R8QMV9_DANRE	0.442252	1.35872	0.148942	tr|A0A2R8QMV9|A0A2R8QMV9_DANRE Signal recognition particle subunit SRP68 OS=Danio rerio OX=7955 GN=srp68 PE=1 SV=1	70712	11	srp68
tr|Q6DGL1|Q6DGL1_DANRE	0.442185	1.35866	0.131729	tr|Q6DGL1|Q6DGL1_DANRE Myeloid-derived growth factor OS=Danio rerio OX=7955 GN=mydgf PE=1 SV=1	18634	5	mydgf
tr|Q6PHD6|Q6PHD6_DANRE	0.441925	1.35842	0.109345	tr|Q6PHD6|Q6PHD6_DANRE 59 kDa serine/threonine-protein kinase OS=Danio rerio OX=7955 GN=ilk PE=1 SV=1	51064	6	ilk
tr|B7ZD88|B7ZD88_DANRE	0.441854	1.35835	0.0705639	tr|B7ZD88|B7ZD88_DANRE WD repeat-containing protein 35 OS=Danio rerio OX=7955 GN=wdr35 PE=1 SV=1	136088	7	wdr35
tr|A0A2R8QPT5|A0A2R8QPT5_DANRE	0.440709	1.35727	0.11063	tr|A0A2R8QPT5|A0A2R8QPT5_DANRE Cell adhesion molecule 2b OS=Danio rerio OX=7955 GN=cadm2b PE=3 SV=1	41010	5	cadm2b
tr|A0A2R8QK17|A0A2R8QK17_DANRE	0.440218	1.35681	0.114649	tr|A0A2R8QK17|A0A2R8QK17_DANRE Neuroblast differentiation-associated protein AHNAK-like OS=Danio rerio OX=7955 GN=LOC795051 PE=4 SV=1	399873	60	LOC795051
tr|A9JRZ5|A9JRZ5_DANRE	0.438832	1.35551	0.0503087	tr|A9JRZ5|A9JRZ5_DANRE Si:ch211-239h19.1 protein (Fragment) OS=Danio rerio OX=7955 GN=plekha5 PE=2 SV=1	141027	19	plekha5
tr|Q6NY65|Q6NY65_DANRE	0.438246	1.35496	0.369708	tr|Q6NY65|Q6NY65_DANRE Regulator of chromosome condensation 1 OS=Danio rerio OX=7955 GN=rcc1 PE=1 SV=1	44273	3	rcc1
tr|Q503D3|Q503D3_DANRE	0.436873	1.35367	0.288606	tr|Q503D3|Q503D3_DANRE Polypyrimidine tract-binding protein 1 OS=Danio rerio OX=7955 GN=ptbp1a PE=1 SV=1	61772	2	ptbp1a
tr|A0A0R4ILP5|A0A0R4ILP5_DANRE	0.436627	1.35344	0.553658	tr|A0A0R4ILP5|A0A0R4ILP5_DANRE FYVE, RhoGEF and PH domain-containing 4a OS=Danio rerio OX=7955 GN=fgd4a PE=4 SV=2	83602	2	fgd4a
tr|Q501T4|Q501T4_DANRE	0.436334	1.35316	0.0591313	tr|Q501T4|Q501T4_DANRE Family with sequence similarity 241 member A OS=Danio rerio OX=7955 GN=fam241a PE=2 SV=1	15742	1	fam241a
tr|F8W5X1|F8W5X1_DANRE	0.436135	1.35298	0.0711061	tr|F8W5X1|F8W5X1_DANRE Poly(A)-binding protein, nuclear 1 (Fragment) OS=Danio rerio OX=7955 GN=pabpn1 PE=1 SV=8	23717	9	pabpn1
tr|A0A2R8RXH3|A0A2R8RXH3_DANRE	0.435684	1.35255	0.114062	tr|A0A2R8RXH3|A0A2R8RXH3_DANRE Switching B cell complex subunit SWAP70b OS=Danio rerio OX=7955 GN=swap70b PE=1 SV=1	69451	16	swap70b
sp|Q7ZWF0|RAE1L_DANRE	0.435519	1.3524	0.200224	sp|Q7ZWF0|RAE1L_DANRE mRNA export factor OS=Danio rerio OX=7955 GN=rae1 PE=2 SV=2	41051	13	rae1
tr|Q7ZUP5|Q7ZUP5_DANRE	0.435347	1.35224	0.366768	tr|Q7ZUP5|Q7ZUP5_DANRE DnaJ (Hsp40) homolog, subfamily A, member 2 OS=Danio rerio OX=7955 GN=dnaja2a PE=1 SV=1	45537	12	dnaja2a
tr|A0A2R8QAJ5|A0A2R8QAJ5_DANRE	0.435291	1.35218	0.183548	tr|A0A2R8QAJ5|A0A2R8QAJ5_DANRE 1-phosphatidylinositol-3-phosphate 5-kinase OS=Danio rerio OX=7955 GN=pikfyve PE=4 SV=1	237261	7	pikfyve
tr|A0A2R8QT01|A0A2R8QT01_DANRE	0.434066	1.35104	0.250918	tr|A0A2R8QT01|A0A2R8QT01_DANRE Ran GTPase-activating protein 1b OS=Danio rerio OX=7955 GN=rangap1b PE=1 SV=1	62371	8	rangap1b
tr|A0A0R4IUS2|A0A0R4IUS2_DANRE	0.434005	1.35098	0.17877	tr|A0A0R4IUS2|A0A0R4IUS2_DANRE BMP2-inducible kinase OS=Danio rerio OX=7955 GN=bmp2k PE=1 SV=1	119181	3	bmp2k
tr|Q1RLR9|Q1RLR9_DANRE	0.43383	1.35081	0.525576	tr|Q1RLR9|Q1RLR9_DANRE Core histone macro-H2A OS=Danio rerio OX=7955 GN=macroh2a1 PE=1 SV=1	38117	8	macroh2a1
tr|A0A2R8QME7|A0A2R8QME7_DANRE	0.43376	1.35075	0.436128	tr|A0A2R8QME7|A0A2R8QME7_DANRE Zinc finger protein 462 OS=Danio rerio OX=7955 PE=1 SV=1	153712	6	Uncharacterized protein
sp|Q498Z6|RT07_DANRE	0.433673	1.35067	0.0620839	sp|Q498Z6|RT07_DANRE 28S ribosomal protein S7, mitochondrial OS=Danio rerio OX=7955 GN=mrps7 PE=2 SV=1	26514	6	mrps7
tr|F1QAR8|F1QAR8_DANRE	0.432447	1.34952	0.17598	tr|F1QAR8|F1QAR8_DANRE Centrosomal protein 170Aa OS=Danio rerio OX=7955 GN=cep170aa PE=3 SV=2	160416	18	cep170aa
tr|A0A0R4ITH7|A0A0R4ITH7_DANRE	0.431785	1.3489	0.392236	tr|A0A0R4ITH7|A0A0R4ITH7_DANRE Poly(ADP-ribose) glycohydrolase OS=Danio rerio OX=7955 GN=pargl PE=1 SV=1	68206	11	pargl
tr|A1L1Y7|A1L1Y7_DANRE	0.43019	1.34741	0.201063	tr|A1L1Y7|A1L1Y7_DANRE Elongation of very long chain fatty acids protein 2 OS=Danio rerio OX=7955 GN=elovl2 PE=2 SV=1	34458	2	elovl2
tr|F1QX26|F1QX26_DANRE	0.42873	1.34605	0.194645	tr|F1QX26|F1QX26_DANRE Galectin OS=Danio rerio OX=7955 GN=lgals9l1 PE=1 SV=1	34901	1	lgals9l1
tr|F1QFQ7|F1QFQ7_DANRE	0.427833	1.34521	0.418452	tr|F1QFQ7|F1QFQ7_DANRE Acyl-CoA dehydrogenase short/branched chain OS=Danio rerio OX=7955 GN=acadsb PE=1 SV=2	46599	17	acadsb
tr|F1R1B1|F1R1B1_DANRE	0.427427	1.34483	0.225	tr|F1R1B1|F1R1B1_DANRE Membrane-associated guanylate kinase, WW and PDZ domain-containing 1a OS=Danio rerio OX=7955 GN=magi1a PE=1 SV=2	122191	8	magi1a
sp|Q1LVF0|LAMC1_DANRE	0.424629	1.34223	0.169793	sp|Q1LVF0|LAMC1_DANRE Laminin subunit gamma-1 OS=Danio rerio OX=7955 GN=lamc1 PE=2 SV=2	176206	31	lamc1
sp|Q5TZ80|HOOK1_DANRE	0.423716	1.34138	0.124517	sp|Q5TZ80|HOOK1_DANRE Protein Hook homolog 1 OS=Danio rerio OX=7955 GN=hook1 PE=2 SV=1	83115	15	hook1
tr|A0A286Y9Z9|A0A286Y9Z9_DANRE	0.422242	1.34001	0.150932	tr|A0A286Y9Z9|A0A286Y9Z9_DANRE Si:ch211-200p22.4 OS=Danio rerio OX=7955 GN=si:ch211-200p22.4 PE=1 SV=1	68424	5	si:ch211-200p22.4
tr|A2BHD8|A2BHD8_DANRE	0.421719	1.33952	0.0690115	tr|A2BHD8|A2BHD8_DANRE Beta-hexosaminidase OS=Danio rerio OX=7955 GN=hexb PE=1 SV=1	61533	15	hexb
tr|A4UU31|A4UU31_DANRE	0.421405	1.33923	0.025541	tr|A4UU31|A4UU31_DANRE MAP kinase kinase 4B OS=Danio rerio OX=7955 GN=map2k4b PE=1 SV=1	46521	4	map2k4b
tr|A3KNT4|A3KNT4_DANRE	0.420234	1.33814	0.131051	tr|A3KNT4|A3KNT4_DANRE Tubulin-folding cofactor C (Fragment) OS=Danio rerio OX=7955 GN=tbcc PE=2 SV=1	39799	1	tbcc
tr|A0A0R4IJ91|A0A0R4IJ91_DANRE	0.419952	1.33788	0.136829	tr|A0A0R4IJ91|A0A0R4IJ91_DANRE Sarcolemma-associated protein a OS=Danio rerio OX=7955 GN=slmapa PE=1 SV=2	94745	16	slmapa
tr|E7F376|E7F376_DANRE	0.419491	1.33746	0.211164	tr|E7F376|E7F376_DANRE Protocadherin 1b OS=Danio rerio OX=7955 GN=pcdh1b PE=4 SV=3	132324	14	pcdh1b
sp|Q567V6|EIF3K_DANRE	0.419137	1.33713	0.00990159	sp|Q567V6|EIF3K_DANRE Eukaryotic translation initiation factor 3 subunit K OS=Danio rerio OX=7955 GN=eif3k PE=2 SV=1	25427	9	eif3k
tr|Q803F7|Q803F7_DANRE	0.418458	1.3365	0.214306	tr|Q803F7|Q803F7_DANRE RNA binding motif protein 4.2 OS=Danio rerio OX=7955 GN=rbm4.2 PE=2 SV=1	42414	1	rbm4.2
tr|F1QVB3|F1QVB3_DANRE	0.417659	1.33576	0.155497	tr|F1QVB3|F1QVB3_DANRE Septin OS=Danio rerio OX=7955 GN=sept8b PE=1 SV=1	49043	13	sept8b
tr|A7E288|A7E288_DANRE	0.417315	1.33544	0.0611725	tr|A7E288|A7E288_DANRE Synaptogyrin OS=Danio rerio OX=7955 GN=syngr3b PE=1 SV=1	25640	5	syngr3b
tr|F6P4N7|F6P4N7_DANRE	0.417185	1.33532	0.391248	tr|F6P4N7|F6P4N7_DANRE Vesicle-associated membrane protein 4 OS=Danio rerio OX=7955 GN=vamp4 PE=1 SV=1	17991	3	vamp4
tr|A0A0R4IN76|A0A0R4IN76_DANRE	0.41611	1.33432	0.238861	tr|A0A0R4IN76|A0A0R4IN76_DANRE 1,4-alpha-glucan branching enzyme (Fragment) OS=Danio rerio OX=7955 GN=gbe1b PE=1 SV=2	78667	16	gbe1b
tr|Q6DBT9|Q6DBT9_DANRE	0.415767	1.33401	0.10736	tr|Q6DBT9|Q6DBT9_DANRE Claudin OS=Danio rerio OX=7955 GN=cldnk PE=1 SV=1	22844	5	cldnk
tr|Q5PNQ4|Q5PNQ4_DANRE	0.415056	1.33335	0.415808	tr|Q5PNQ4|Q5PNQ4_DANRE Nucleoside diphosphate kinase 7 OS=Danio rerio OX=7955 GN=nme7 PE=3 SV=1	41999	5	nme7
tr|A2CEB4|A2CEB4_DANRE	0.413956	1.33233	0.414138	tr|A2CEB4|A2CEB4_DANRE Golgin A3 OS=Danio rerio OX=7955 GN=golga3 PE=1 SV=1	168503	13	golga3
tr|A0A0R4IWH7|A0A0R4IWH7_DANRE	0.413902	1.33228	0.072592	tr|A0A0R4IWH7|A0A0R4IWH7_DANRE APC regulator of WNT-signaling pathway OS=Danio rerio OX=7955 GN=apc PE=1 SV=1	301092	27	apc
sp|Q503L9|NXN_DANRE	0.41319	1.33163	0.348647	sp|Q503L9|NXN_DANRE Nucleoredoxin OS=Danio rerio OX=7955 GN=nxn PE=2 SV=1	47410	9	nxn
tr|Q6PGY7|Q6PGY7_DANRE	0.412337	1.33084	0.226672	tr|Q6PGY7|Q6PGY7_DANRE CDGSH iron sulfur domain 1 OS=Danio rerio OX=7955 GN=cisd1 PE=1 SV=1	11834	5	cisd1
tr|A8DZA3|A8DZA3_DANRE	0.412331	1.33083	0.158494	tr|A8DZA3|A8DZA3_DANRE IQ motif and Sec7 domain ArfGEF 3b (Fragment) OS=Danio rerio OX=7955 GN=iqsec3b PE=3 SV=1	92698	2	iqsec3b
sp|Q6TH22|DDI2_DANRE	0.412129	1.33065	0.521505	sp|Q6TH22|DDI2_DANRE Protein DDI1 homolog 2 OS=Danio rerio OX=7955 GN=ddi2 PE=2 SV=1	45596	9	ddi2
tr|A0A0R4IRQ4|A0A0R4IRQ4_DANRE	0.41178	1.33033	0.124918	tr|A0A0R4IRQ4|A0A0R4IRQ4_DANRE Striatin, calmodulin-binding protein 4 OS=Danio rerio OX=7955 GN=strn4 PE=1 SV=1	83433	13	strn4
tr|A0JMN2|A0JMN2_DANRE	0.411523	1.33009	0.0581571	tr|A0JMN2|A0JMN2_DANRE Zgc:154046 OS=Danio rerio OX=7955 GN=zgc:154046 PE=1 SV=1	71439	6	zgc:154046
tr|Q9I9N4|Q9I9N4_DANRE	0.411497	1.33007	0.0879685	tr|Q9I9N4|Q9I9N4_DANRE BCL2-associated X, apoptosis regulator a OS=Danio rerio OX=7955 GN=baxa PE=2 SV=1	21401	1	baxa
tr|F1QMB4|F1QMB4_DANRE	0.411397	1.32997	0.343104	tr|F1QMB4|F1QMB4_DANRE Golgin B1 OS=Danio rerio OX=7955 GN=golgb1 PE=1 SV=1	386922	14	golgb1
tr|Q503S9|Q503S9_DANRE	0.411381	1.32996	0.143672	tr|Q503S9|Q503S9_DANRE Inositol-1-monophosphatase OS=Danio rerio OX=7955 GN=impa2 PE=2 SV=1	29878	10	impa2
tr|Q6DI16|Q6DI16_DANRE	0.411283	1.32987	0.408221	tr|Q6DI16|Q6DI16_DANRE Calsequestrin OS=Danio rerio OX=7955 GN=casq2 PE=1 SV=1	47330	8	casq2
tr|B0R0J7|B0R0J7_DANRE	0.410486	1.32913	0.0152784	tr|B0R0J7|B0R0J7_DANRE Novel protein (Fragment) OS=Danio rerio OX=7955 GN=si:ch73-208g10.1 PE=3 SV=1	24672	1	si:ch73-208g10.1
tr|F1QV19|F1QV19_DANRE	0.409709	1.32842	0.200185	tr|F1QV19|F1QV19_DANRE Gamma-glutamylcyclotransferase OS=Danio rerio OX=7955 GN=ggctb PE=1 SV=1	24605	12	ggctb
tr|A0A8D3IZM5|A0A8D3IZM5_DANRE	0.409082	1.32784	0.232072	tr|A0A8D3IZM5|A0A8D3IZM5_DANRE Nucleoporin 88 OS=Danio rerio OX=7955 GN=nup88 PE=4 SV=1	80857	7	nup88
tr|A2BGU5|A2BGU5_DANRE	0.409049	1.32781	0.277837	tr|A2BGU5|A2BGU5_DANRE Low density lipoprotein receptor-related protein-associated protein 1 OS=Danio rerio OX=7955 GN=lrpap1 PE=1 SV=1	40830	1	lrpap1
tr|F1QC64|F1QC64_DANRE	0.408806	1.32759	0.0620527	tr|F1QC64|F1QC64_DANRE Myosin, heavy chain 9b, non-muscle OS=Danio rerio OX=7955 GN=myh9b PE=1 SV=4	203402	45	myh9b
sp|Q7ZV00|OTU6B_DANRE	0.408311	1.32713	0.286693	sp|Q7ZV00|OTU6B_DANRE Deubiquitinase OTUD6B OS=Danio rerio OX=7955 GN=otud6b PE=2 SV=1	33507	4	otud6b
tr|Q5SPD5|Q5SPD5_DANRE	0.408298	1.32712	0.168081	tr|Q5SPD5|Q5SPD5_DANRE GDP-4-keto-6-deoxy-D-mannose-3,5-epimerase-4-reductase OS=Danio rerio OX=7955 GN=gfus PE=2 SV=1	36073	6	gfus
tr|U3JB13|U3JB13_DANRE	0.40821	1.32704	0.205651	tr|U3JB13|U3JB13_DANRE Actin-binding LIM protein 1b OS=Danio rerio OX=7955 GN=ablim1b PE=4 SV=1	84999	2	ablim1b
tr|A0A0R4IPY3|A0A0R4IPY3_DANRE	0.40782	1.32668	0.480829	tr|A0A0R4IPY3|A0A0R4IPY3_DANRE Protein kinase C OS=Danio rerio OX=7955 GN=prkcab PE=3 SV=2	72799	7	prkcab
tr|Q6PFN2|Q6PFN2_DANRE	0.4074	1.32629	0.264413	tr|Q6PFN2|Q6PFN2_DANRE Acyl-peptide hydrolase OS=Danio rerio OX=7955 GN=apeh PE=2 SV=1	81464	14	apeh
tr|E7FBI4|E7FBI4_DANRE	0.407397	1.32629	0.0544311	tr|E7FBI4|E7FBI4_DANRE RAP1A, member of RAS oncogene family b OS=Danio rerio OX=7955 GN=rap1ab PE=1 SV=1	21011	1	rap1ab
tr|Q568R9|Q568R9_DANRE	0.40663	1.32559	0.0534853	tr|Q568R9|Q568R9_DANRE Gamma1b-synuclein OS=Danio rerio OX=7955 GN=sncga PE=1 SV=1	11264	4	sncga
tr|F1QRL7|F1QRL7_DANRE	0.406043	1.32505	0.270482	tr|F1QRL7|F1QRL7_DANRE Neurexin-3b OS=Danio rerio OX=7955 GN=nrxn3b PE=4 SV=1	155602	1	nrxn3b
sp|Q6AXK4|BABA1_DANRE	0.405808	1.32483	0.387518	sp|Q6AXK4|BABA1_DANRE BRISC and BRCA1-A complex member 1 OS=Danio rerio OX=7955 GN=babam1 PE=2 SV=2	40901	4	babam1
tr|F1QEF5|F1QEF5_DANRE	0.405699	1.32473	0.178199	tr|F1QEF5|F1QEF5_DANRE Mitochondrial ribosomal protein L48 OS=Danio rerio OX=7955 GN=mrpl48 PE=1 SV=1	23931	5	mrpl48
tr|Q5XWT8|Q5XWT8_DANRE	0.405105	1.32419	0.199424	tr|Q5XWT8|Q5XWT8_DANRE Ras-dva-2 small GTPase OS=Danio rerio OX=7955 GN=rasd4 PE=2 SV=1	23710	5	rasd4
tr|A0A0R4IGN2|A0A0R4IGN2_DANRE	0.405063	1.32415	0.217232	tr|A0A0R4IGN2|A0A0R4IGN2_DANRE Very low-density lipoprotein receptor OS=Danio rerio OX=7955 GN=vldlr PE=1 SV=2	95553	9	vldlr
tr|A0JMP8|A0JMP8_DANRE	0.40426	1.32341	0.259384	tr|A0JMP8|A0JMP8_DANRE A2ml protein (Fragment) OS=Danio rerio OX=7955 GN=a2ml PE=2 SV=1	160021	4	a2ml
sp|A0A0G2KTI4|S12A2_DANRE	0.403591	1.3228	0.0150109	sp|A0A0G2KTI4|S12A2_DANRE Solute carrier family 12 member 2 OS=Danio rerio OX=7955 GN=slc12a2 PE=1 SV=3	124112	15	slc12a2
tr|A3KDM3|A3KDM3_DANRE	0.403503	1.32272	0.226305	tr|A3KDM3|A3KDM3_DANRE CTR9 homolog, Paf1/RNA polymerase II complex component OS=Danio rerio OX=7955 GN=ctr9 PE=1 SV=1	132305	9	ctr9
tr|A0A2R8QGS5|A0A2R8QGS5_DANRE	0.403012	1.32227	0.11976	tr|A0A2R8QGS5|A0A2R8QGS5_DANRE Si:ch211-266d19.4 OS=Danio rerio OX=7955 GN=znf271 PE=1 SV=1	123727	4	znf271
tr|A0A2R8RHV6|A0A2R8RHV6_DANRE	0.402791	1.32206	0.200053	tr|A0A2R8RHV6|A0A2R8RHV6_DANRE 6-phosphofructo-2-kinase/fructose-2,6-biphosphatase 4a OS=Danio rerio OX=7955 GN=pfkfb4a PE=1 SV=1	52534	1	pfkfb4a
tr|E7F6M7|E7F6M7_DANRE	0.402218	1.32154	0.280884	tr|E7F6M7|E7F6M7_DANRE Glycerol-3-phosphate acyltransferase 1, mitochondrial OS=Danio rerio OX=7955 GN=gpam PE=1 SV=1	93379	8	gpam
tr|F1QAD7|F1QAD7_DANRE	0.401852	1.3212	0.468017	tr|F1QAD7|F1QAD7_DANRE Phosphatidylinositol-4,5-bisphosphate 3-kinase OS=Danio rerio OX=7955 GN=pik3ca PE=3 SV=2	124445	9	pik3ca
tr|A0A0R4IVR3|A0A0R4IVR3_DANRE	0.40039	1.31986	0.224027	tr|A0A0R4IVR3|A0A0R4IVR3_DANRE Regulator of G protein-signaling 7b OS=Danio rerio OX=7955 GN=rgs7b PE=4 SV=1	46536	7	rgs7b
tr|A0A0G2KU38|A0A0G2KU38_DANRE	0.400369	1.31985	0.192084	tr|A0A0G2KU38|A0A0G2KU38_DANRE Voltage-gated potassium channel subunit beta-2-like OS=Danio rerio OX=7955 GN=LOC100334158 PE=3 SV=2	43228	7	LOC100334158
tr|A8WHZ4|A8WHZ4_DANRE	0.400115	1.31961	0.289181	tr|A8WHZ4|A8WHZ4_DANRE Calcium channel, voltage-dependent, beta 4a subunit (Fragment) OS=Danio rerio OX=7955 GN=cacnb4a PE=3 SV=1	55802	5	cacnb4a
tr|Q32LQ2|Q32LQ2_DANRE	0.398214	1.31788	0.453009	tr|Q32LQ2|Q32LQ2_DANRE Matrix AAA peptidase-interacting protein 1 OS=Danio rerio OX=7955 GN=maip1 PE=1 SV=1	28191	6	maip1
tr|A0A2R8QBS0|A0A2R8QBS0_DANRE	0.398049	1.31772	0.0916132	tr|A0A2R8QBS0|A0A2R8QBS0_DANRE CUE domain-containing 1b OS=Danio rerio OX=7955 GN=cuedc1b PE=1 SV=1	42996	3	cuedc1b
tr|A2BFG9|A2BFG9_DANRE	0.397884	1.31757	0.2159	tr|A2BFG9|A2BFG9_DANRE Ubiquitin-associated and SH3 domain-containing Ba OS=Danio rerio OX=7955 GN=ubash3ba PE=4 SV=1	71951	9	ubash3ba
tr|Q6GMJ1|Q6GMJ1_DANRE	0.397588	1.3173	0.398912	tr|Q6GMJ1|Q6GMJ1_DANRE Carboxylic ester hydrolase (Fragment) OS=Danio rerio OX=7955 GN=ces2a PE=1 SV=1	60635	2	ces2a
tr|F1QSB3|F1QSB3_DANRE	0.397584	1.3173	0.132007	tr|F1QSB3|F1QSB3_DANRE Signal recognition particle receptor subunit beta OS=Danio rerio OX=7955 GN=srprb PE=1 SV=1	29454	5	srprb
tr|A0A0R4IKC5|A0A0R4IKC5_DANRE	0.397567	1.31728	0.376443	tr|A0A0R4IKC5|A0A0R4IKC5_DANRE Anoctamin OS=Danio rerio OX=7955 GN=ano2b PE=3 SV=1	115116	7	ano2b
tr|A0A0R4IAQ8|A0A0R4IAQ8_DANRE	0.397314	1.31705	0.204202	tr|A0A0R4IAQ8|A0A0R4IAQ8_DANRE Nuclear pore complex protein Nup98-Nup96 OS=Danio rerio OX=7955 GN=nup98 PE=1 SV=2	195095	18	nup98
tr|A0A2R8Q3F0|A0A2R8Q3F0_DANRE	0.397174	1.31693	0.100541	tr|A0A2R8Q3F0|A0A2R8Q3F0_DANRE Eukaryotic translation initiation factor 4Bb OS=Danio rerio OX=7955 GN=eif4bb PE=1 SV=1	71310	8	eif4bb
sp|Q6DBY5|UEVLD_DANRE	0.397037	1.3168	0.0314121	sp|Q6DBY5|UEVLD_DANRE Ubiquitin-conjugating enzyme E2 variant 3 OS=Danio rerio OX=7955 GN=uevld PE=2 SV=1	51264	2	uevld
tr|A0A2R8Q420|A0A2R8Q420_DANRE	0.39652	1.31633	0.237817	tr|A0A2R8Q420|A0A2R8Q420_DANRE Golgi-associated, gamma adaptin ear-containing, ARF-binding protein 1 OS=Danio rerio OX=7955 GN=gga1 PE=1 SV=1	70285	10	gga1
tr|A0A0G2KKK6|A0A0G2KKK6_DANRE	0.396143	1.31598	0.0623174	tr|A0A0G2KKK6|A0A0G2KKK6_DANRE Rho GTPase-activating protein 39 OS=Danio rerio OX=7955 GN=arhgap39 PE=4 SV=2	105577	3	arhgap39
tr|Q7SY45|Q7SY45_DANRE	0.395393	1.3153	0.12601	tr|Q7SY45|Q7SY45_DANRE Vesicle transport through interaction with t-SNAREs 1B OS=Danio rerio OX=7955 GN=vti1b PE=1 SV=1	25891	4	vti1b
tr|A0A0R4IZH2|A0A0R4IZH2_DANRE	0.394946	1.31489	0.451269	tr|A0A0R4IZH2|A0A0R4IZH2_DANRE Kappa-type 3 opioid receptor OS=Danio rerio OX=7955 GN=oprl1 PE=3 SV=1	40654	1	oprl1
tr|Q6TGT3|Q6TGT3_DANRE	0.393921	1.31396	0.0523003	tr|Q6TGT3|Q6TGT3_DANRE Dynein light chain Tctex-type 3 OS=Danio rerio OX=7955 GN=dynlt3 PE=1 SV=1	12688	4	dynlt3
tr|A0A0R4IS36|A0A0R4IS36_DANRE	0.393528	1.3136	0.45436	tr|A0A0R4IS36|A0A0R4IS36_DANRE Endophilin-B1 OS=Danio rerio OX=7955 GN=sh3glb1b PE=1 SV=2	44385	4	sh3glb1b
tr|A2BGM8|A2BGM8_DANRE	0.392133	1.31233	0.132207	tr|A2BGM8|A2BGM8_DANRE HECT-type E3 ubiquitin transferase OS=Danio rerio OX=7955 GN=ube3b PE=1 SV=1	122543	16	ube3b
tr|A0A0R4IEL8|A0A0R4IEL8_DANRE	0.391545	1.3118	0.279545	tr|A0A0R4IEL8|A0A0R4IEL8_DANRE Calmodulin-regulated spectrin-associated protein family, member 2b OS=Danio rerio OX=7955 GN=camsap2b PE=4 SV=2	89844	3	camsap2b
tr|A0A0H2UKN7|A0A0H2UKN7_DANRE	0.391346	1.31162	0.356325	tr|A0A0H2UKN7|A0A0H2UKN7_DANRE Sodium channel, voltage-gated, type I, beta b OS=Danio rerio OX=7955 GN=scn1bb PE=4 SV=1	22508	6	scn1bb
tr|K7DYJ7|K7DYJ7_DANRE	0.391177	1.31146	0.104859	tr|K7DYJ7|K7DYJ7_DANRE Ca++-dependent secretion activator 2 OS=Danio rerio OX=7955 GN=cadps2 PE=4 SV=1	54841	4	cadps2
tr|A0A2R8QUB8|A0A2R8QUB8_DANRE	0.390912	1.31122	0.27411	tr|A0A2R8QUB8|A0A2R8QUB8_DANRE Ubiquitinyl hydrolase 1 OS=Danio rerio OX=7955 GN=usp32 PE=4 SV=1	176333	8	usp32
tr|F1QSL6|F1QSL6_DANRE	0.390875	1.31119	0.395815	tr|F1QSL6|F1QSL6_DANRE F-box protein 44 OS=Danio rerio OX=7955 GN=fbxo44.1 PE=1 SV=1	34457	7	fbxo44.1
sp|Q90XF2|KPCI_DANRE	0.390849	1.31116	0.413653	sp|Q90XF2|KPCI_DANRE Protein kinase C iota type OS=Danio rerio OX=7955 GN=prkci PE=2 SV=2	67322	5	prkci
tr|B3DJE6|B3DJE6_DANRE	0.390746	1.31107	0.31889	tr|B3DJE6|B3DJE6_DANRE GlcNAc 2-epimerase OS=Danio rerio OX=7955 GN=renbp PE=2 SV=1	46816	1	renbp
tr|Q5RH05|Q5RH05_DANRE	0.390594	1.31093	0.0538291	tr|Q5RH05|Q5RH05_DANRE Serine/threonine kinase 38-like OS=Danio rerio OX=7955 GN=stk38l PE=3 SV=1	53909	6	stk38l
tr|B0S6K4|B0S6K4_DANRE	0.390371	1.31073	0.438896	tr|B0S6K4|B0S6K4_DANRE Mitochondrial ribosomal protein S14 OS=Danio rerio OX=7955 GN=mrps14 PE=1 SV=1	16325	3	mrps14
tr|Q7SY26|Q7SY26_DANRE	0.390087	1.31047	0.207528	tr|Q7SY26|Q7SY26_DANRE Zgc:63587 OS=Danio rerio OX=7955 GN=zgc:63587 PE=1 SV=1	31580	5	zgc:63587
tr|B0UYL5|B0UYL5_DANRE	0.389931	1.31033	0.403276	tr|B0UYL5|B0UYL5_DANRE Dehydrogenase/reductase (SDR family) member 12 OS=Danio rerio OX=7955 GN=dhrs12 PE=1 SV=1	35709	2	dhrs12
sp|Q6DHC1|RB18B_DANRE	0.389923	1.31032	0.0687782	sp|Q6DHC1|RB18B_DANRE Ras-related protein Rab-18-B OS=Danio rerio OX=7955 GN=rab18b PE=2 SV=1	23013	5	rab18b
sp|Q7ZTS4|K1C18_DANRE	0.389649	1.31007	0.0451463	sp|Q7ZTS4|K1C18_DANRE Keratin, type I cytoskeletal 18 OS=Danio rerio OX=7955 GN=krt18 PE=1 SV=2	48631	33	krt18
tr|A0A0G2KYC0|A0A0G2KYC0_DANRE	0.388974	1.30946	0.433698	tr|A0A0G2KYC0|A0A0G2KYC0_DANRE Cytoplasmic polyadenylation element-binding protein 4b OS=Danio rerio OX=7955 GN=cpeb4b PE=3 SV=1	80263	4	cpeb4b
sp|Q6NUV0|RB3GP_DANRE	0.388757	1.30926	0.0160136	sp|Q6NUV0|RB3GP_DANRE Rab3 GTPase-activating protein catalytic subunit OS=Danio rerio OX=7955 GN=rab3gap1 PE=2 SV=2	108621	16	rab3gap1
tr|A0A2R8Q124|A0A2R8Q124_DANRE	0.387753	1.30835	0.177328	tr|A0A2R8Q124|A0A2R8Q124_DANRE Glycerophosphodiester phosphodiesterase 1 OS=Danio rerio OX=7955 GN=gde1 PE=1 SV=1	35976	8	gde1
tr|A0A2H4R0I5|A0A2H4R0I5_DANRE	0.38729	1.30793	0.146331	tr|A0A2H4R0I5|A0A2H4R0I5_DANRE Calpain inhibitor OS=Danio rerio OX=7955 GN=cast PE=2 SV=1	85642	13	cast
tr|A0A2R8QI53|A0A2R8QI53_DANRE	0.386914	1.30759	0.174108	tr|A0A2R8QI53|A0A2R8QI53_DANRE Lymphocyte antigen 75 OS=Danio rerio OX=7955 GN=ly75 PE=1 SV=1	200405	13	ly75
tr|F1QQY7|F1QQY7_DANRE	0.386861	1.30755	0.140441	tr|F1QQY7|F1QQY7_DANRE Si:dkey-215k6.1 OS=Danio rerio OX=7955 GN=si:dkey-215k6.1 PE=4 SV=3	71860	3	si:dkey-215k6.1
tr|A0A0R4IBI0|A0A0R4IBI0_DANRE	0.386815	1.3075	0.381633	tr|A0A0R4IBI0|A0A0R4IBI0_DANRE DENN/MADD domain-containing 4B OS=Danio rerio OX=7955 GN=dennd4b PE=1 SV=1	165041	12	dennd4b
tr|A0A0R4II12|A0A0R4II12_DANRE	0.386567	1.30728	0.389315	tr|A0A0R4II12|A0A0R4II12_DANRE Glucosamine (UDP-N-acetyl)-2-epimerase/N-acetylmannosamine kinase OS=Danio rerio OX=7955 GN=gne PE=1 SV=2	82451	7	gne
tr|A0A0R4IVF2|A0A0R4IVF2_DANRE	0.386277	1.30702	0.122918	tr|A0A0R4IVF2|A0A0R4IVF2_DANRE Si:ch211-1a19.3 OS=Danio rerio OX=7955 GN=si:ch211-1a19.3 PE=1 SV=1	27034	1	si:ch211-1a19.3
sp|A7E2M3|EMC10_DANRE	0.386224	1.30697	0.232525	sp|A7E2M3|EMC10_DANRE ER membrane protein complex subunit 10 OS=Danio rerio OX=7955 GN=emc10 PE=2 SV=1	28244	4	emc10
tr|B0R0I5|B0R0I5_DANRE	0.385671	1.30647	0.260917	tr|B0R0I5|B0R0I5_DANRE Cerebellin 12 OS=Danio rerio OX=7955 GN=cbln12 PE=4 SV=1	21793	2	cbln12
tr|A0A286YA11|A0A286YA11_DANRE	0.385339	1.30617	0.333178	tr|A0A286YA11|A0A286YA11_DANRE Epidermal growth factor receptor pathway substrate 15-like 1a OS=Danio rerio OX=7955 GN=eps15l1a PE=4 SV=2	100286	1	eps15l1a
tr|F6NTM9|F6NTM9_DANRE	0.38533	1.30616	0.211353	tr|F6NTM9|F6NTM9_DANRE Protein phosphatase 1, regulatory subunit 9A OS=Danio rerio OX=7955 GN=ppp1r9a PE=4 SV=1	119430	12	ppp1r9a
tr|F1R9W6|F1R9W6_DANRE	0.384581	1.30548	0.218637	tr|F1R9W6|F1R9W6_DANRE Zgc:110239 OS=Danio rerio OX=7955 GN=zgc:110239 PE=1 SV=1	61413	7	zgc:110239
tr|A1A5Y9|A1A5Y9_DANRE	0.384284	1.30521	0.074945	tr|A1A5Y9|A1A5Y9_DANRE Zgc:158423 OS=Danio rerio OX=7955 GN=zgc:158423 PE=2 SV=1	53336	12	zgc:158423
tr|E9QCG5|E9QCG5_DANRE	0.384236	1.30517	0.167792	tr|E9QCG5|E9QCG5_DANRE Protein kinase C OS=Danio rerio OX=7955 GN=pkn1a PE=1 SV=3	104946	14	pkn1a
tr|A0A0R4I9S5|A0A0R4I9S5_DANRE	0.384133	1.30507	0.027558	tr|A0A0R4I9S5|A0A0R4I9S5_DANRE N-alpha-acetyltransferase 15, NatA auxiliary subunit b OS=Danio rerio OX=7955 GN=naa15b PE=1 SV=2	100819	17	naa15b
sp|Q6DGK2|LDHBB_DANRE	0.384039	1.30499	0.11492	sp|Q6DGK2|LDHBB_DANRE L-lactate dehydrogenase B-B chain OS=Danio rerio OX=7955 GN=ldhbb PE=2 SV=1	36710	8	ldhbb
tr|R4GDS9|R4GDS9_DANRE	0.383613	1.30461	0.0286153	tr|R4GDS9|R4GDS9_DANRE Solute carrier family 25 member 23a OS=Danio rerio OX=7955 GN=slc25a23a PE=1 SV=1	53329	12	slc25a23a
tr|E7FB24|E7FB24_DANRE	0.383612	1.3046	0.270373	tr|E7FB24|E7FB24_DANRE Si:cabz01090165.1 OS=Danio rerio OX=7955 GN=zmp:0000001073 PE=4 SV=3	70593	7	zmp:0000001073
sp|Q6DRM0|GET1_DANRE	0.383459	1.30447	0.363099	sp|Q6DRM0|GET1_DANRE Guided entry of tail-anchored proteins factor 1 OS=Danio rerio OX=7955 GN=get1 PE=2 SV=1	19219	3	get1
tr|Q1L8S1|Q1L8S1_DANRE	0.383394	1.30441	0.469921	tr|Q1L8S1|Q1L8S1_DANRE Chromatin target of PRMT1a OS=Danio rerio OX=7955 GN=chtopa PE=1 SV=1	21970	6	chtopa
tr|A0A0R4IQG7|A0A0R4IQG7_DANRE	0.383339	1.30436	0.108238	tr|A0A0R4IQG7|A0A0R4IQG7_DANRE Nitric oxide synthase OS=Danio rerio OX=7955 GN=nos1 PE=1 SV=1	161845	30	nos1
tr|A0A2R8PY84|A0A2R8PY84_DANRE	0.382534	1.30363	0.0650075	tr|A0A2R8PY84|A0A2R8PY84_DANRE Purkinje cell protein 4 OS=Danio rerio OX=7955 PE=4 SV=1	6777	2	Uncharacterized protein
tr|F1QD21|F1QD21_DANRE	0.381834	1.303	0.40393	tr|F1QD21|F1QD21_DANRE Zgc:113337 OS=Danio rerio OX=7955 GN=zgc:113337 PE=4 SV=1	42714	2	zgc:113337
tr|F1R8J8|F1R8J8_DANRE	0.381262	1.30248	0.30181	tr|F1R8J8|F1R8J8_DANRE LUC7-like (S. cerevisiae) OS=Danio rerio OX=7955 GN=luc7l PE=1 SV=1	43317	4	luc7l
tr|B0S7J7|B0S7J7_DANRE	0.381102	1.30234	0.385182	tr|B0S7J7|B0S7J7_DANRE Nuclear receptor-interacting protein 2 OS=Danio rerio OX=7955 GN=nrip2 PE=2 SV=1	33219	5	nrip2
tr|Q63ZV9|Q63ZV9_DANRE	0.380998	1.30224	0.0881231	tr|Q63ZV9|Q63ZV9_DANRE Protein tyrosine phosphatase 4A2a OS=Danio rerio OX=7955 GN=ptp4a2a PE=1 SV=1	19171	3	ptp4a2a
tr|A0A0R4IT86|A0A0R4IT86_DANRE	0.380812	1.30207	0.264942	tr|A0A0R4IT86|A0A0R4IT86_DANRE Kirre-like nephrin family adhesion molecule 3, like OS=Danio rerio OX=7955 GN=kirrel3l PE=4 SV=1	81947	10	kirrel3l
tr|F1Q653|F1Q653_DANRE	0.380785	1.30205	0.0147736	tr|F1Q653|F1Q653_DANRE Protein tyrosine phosphatase, non-receptor type 23, a OS=Danio rerio OX=7955 GN=ptpn23a PE=1 SV=1	220185	17	ptpn23a
tr|F1QF73|F1QF73_DANRE	0.380632	1.30191	0.19148	tr|F1QF73|F1QF73_DANRE Epidermal growth factor receptor pathway substrate 15-like 1a OS=Danio rerio OX=7955 GN=eps15l1a PE=4 SV=4	100728	1	eps15l1a
sp|B8JMH0|CAF17_DANRE	0.380085	1.30142	0.0869098	sp|B8JMH0|CAF17_DANRE Putative transferase CAF17 homolog, mitochondrial OS=Danio rerio OX=7955 GN=iba57 PE=3 SV=1	39046	1	iba57
tr|Q8UUT6|Q8UUT6_DANRE	0.379989	1.30133	0.164063	tr|Q8UUT6|Q8UUT6_DANRE DMalpha1 OS=Danio rerio OX=7955 GN=plp1a PE=1 SV=1	27510	3	plp1a
tr|A8WGS0|A8WGS0_DANRE	0.3798	1.30116	0.0752099	tr|A8WGS0|A8WGS0_DANRE Cyb5a protein OS=Danio rerio OX=7955 GN=cyb5a PE=1 SV=1	15392	4	cyb5a
sp|P79741|PESC_DANRE	0.379564	1.30095	0.482343	sp|P79741|PESC_DANRE Pescadillo OS=Danio rerio OX=7955 GN=pes PE=2 SV=2	67898	5	pes
tr|F1Q7F3|F1Q7F3_DANRE	0.379559	1.30094	0.126301	tr|F1Q7F3|F1Q7F3_DANRE NADPH--cytochrome P450 reductase OS=Danio rerio OX=7955 GN=pora PE=1 SV=1	77006	11	pora
sp|Q6PH37|ST1S1_DANRE	0.379525	1.30091	0.0576279	sp|Q6PH37|ST1S1_DANRE Cytosolic sulfotransferase 1 OS=Danio rerio OX=7955 GN=sult1st1 PE=1 SV=1	35035	10	sult1st1
tr|A0A2R8PZ44|A0A2R8PZ44_DANRE	0.379333	1.30074	0.450084	tr|A0A2R8PZ44|A0A2R8PZ44_DANRE CDK5 regulatory subunit-associated protein 3 OS=Danio rerio OX=7955 GN=cdk5rap3 PE=1 SV=1	55150	12	cdk5rap3
sp|Q7ZUK7|WAC_DANRE	0.379321	1.30073	0.436029	sp|Q7ZUK7|WAC_DANRE WW domain-containing adapter protein with coiled-coil OS=Danio rerio OX=7955 GN=waca PE=2 SV=1	60592	4	waca
tr|A0A0G2L6W2|A0A0G2L6W2_DANRE	0.379055	1.30049	0.522287	tr|A0A0G2L6W2|A0A0G2L6W2_DANRE Hyaluronan and proteoglycan link protein 1 OS=Danio rerio OX=7955 PE=4 SV=2	38986	5	Uncharacterized protein
sp|Q5SPB1|S38A2_DANRE	0.378742	1.30021	0.0811881	sp|Q5SPB1|S38A2_DANRE Sodium-coupled neutral amino acid transporter 2 OS=Danio rerio OX=7955 GN=slc38a2 PE=3 SV=1	55832	2	slc38a2
sp|Q803I4|RING2_DANRE	0.378233	1.29975	0.207269	sp|Q803I4|RING2_DANRE E3 ubiquitin-protein ligase RING2 OS=Danio rerio OX=7955 GN=rnf2 PE=2 SV=1	37539	8	rnf2
tr|A0A2R8QIF2|A0A2R8QIF2_DANRE	0.377681	1.29925	0.113871	tr|A0A2R8QIF2|A0A2R8QIF2_DANRE Exocyst complex component 3 OS=Danio rerio OX=7955 GN=exoc3 PE=1 SV=1	86958	21	exoc3
tr|F6NZP4|F6NZP4_DANRE	0.37753	1.29912	0.104876	tr|F6NZP4|F6NZP4_DANRE Extended synaptotagmin-like protein 1b OS=Danio rerio OX=7955 GN=esyt1b PE=1 SV=1	175079	31	esyt1b
tr|B0BLX3|B0BLX3_DANRE	0.377429	1.29902	0.0120378	tr|B0BLX3|B0BLX3_DANRE Zgc:92004 protein OS=Danio rerio OX=7955 GN=epb41l3a PE=2 SV=1	91708	2	epb41l3a
tr|Q66I86|Q66I86_DANRE	0.377317	1.29892	0.249934	tr|Q66I86|Q66I86_DANRE Mitochondrial ribosomal protein L40 OS=Danio rerio OX=7955 GN=mrpl40 PE=1 SV=1	23243	2	mrpl40
tr|A0A0R4ISW4|A0A0R4ISW4_DANRE	0.377032	1.29867	0.404894	tr|A0A0R4ISW4|A0A0R4ISW4_DANRE AT-rich interactive domain 1B (SWI1-like) OS=Danio rerio OX=7955 GN=arid1b PE=4 SV=2	227501	8	arid1b
sp|A4QNX2|S247B_DANRE	0.37685	1.2985	0.487268	sp|A4QNX2|S247B_DANRE Solute carrier family 25 member 47-B OS=Danio rerio OX=7955 GN=slc25a47b PE=2 SV=1	31537	6	slc25a47b
tr|A0A286Y869|A0A286Y869_DANRE	0.376075	1.29781	0.0465559	tr|A0A286Y869|A0A286Y869_DANRE WD repeat and FYVE domain-containing 3 OS=Danio rerio OX=7955 GN=wdfy3 PE=1 SV=2	394571	58	wdfy3
tr|E7F9Q1|E7F9Q1_DANRE	0.375545	1.29733	0.289798	tr|E7F9Q1|E7F9Q1_DANRE ATP-binding domain-containing protein 4 OS=Danio rerio OX=7955 GN=dph6 PE=1 SV=2	54571	3	dph6
tr|A2AR64|A2AR64_DANRE	0.375513	1.2973	0.41076	tr|A2AR64|A2AR64_DANRE Regulator of complement activation group 2 gene 1 OS=Danio rerio OX=7955 GN=rca2.1 PE=1 SV=1	41561	7	rca2.1
tr|A0A0R4IJ71|A0A0R4IJ71_DANRE	0.375498	1.29729	0.387515	tr|A0A0R4IJ71|A0A0R4IJ71_DANRE Plectin b OS=Danio rerio OX=7955 GN=plecb PE=1 SV=2	516829	53	plecb
sp|A4IG66|TM201_DANRE	0.375457	1.29725	0.204151	sp|A4IG66|TM201_DANRE Transmembrane protein 201 OS=Danio rerio OX=7955 GN=tmem201 PE=2 SV=1	72016	6	tmem201
tr|F1QNY5|F1QNY5_DANRE	0.375371	1.29717	0.0700316	tr|F1QNY5|F1QNY5_DANRE Copine I OS=Danio rerio OX=7955 GN=cpne1 PE=1 SV=1	59261	1	cpne1
sp|Q803J8|ZC3HF_DANRE	0.375361	1.29716	0.11094	sp|Q803J8|ZC3HF_DANRE Zinc finger CCCH domain-containing protein 15 OS=Danio rerio OX=7955 GN=zc3h15 PE=2 SV=1	49214	9	zc3h15
tr|Q7ZUZ4|Q7ZUZ4_DANRE	0.374997	1.29684	0.338042	tr|Q7ZUZ4|Q7ZUZ4_DANRE Programmed cell death 5 OS=Danio rerio OX=7955 GN=pdcd5 PE=1 SV=1	14588	4	pdcd5
tr|A0A0R4IVY5|A0A0R4IVY5_DANRE	0.374957	1.2968	0.045453	tr|A0A0R4IVY5|A0A0R4IVY5_DANRE Rho-associated protein kinase OS=Danio rerio OX=7955 GN=rock1 PE=1 SV=2	158505	20	rock1
tr|E7F0T8|E7F0T8_DANRE	0.373908	1.29586	0.481938	tr|E7F0T8|E7F0T8_DANRE Si:ch211-11k18.4 OS=Danio rerio OX=7955 GN=si:ch211-11k18.4 PE=1 SV=1	50511	8	si:ch211-11k18.4
sp|A5PLK2|LHPP_DANRE	0.373898	1.29585	0.37011	sp|A5PLK2|LHPP_DANRE Phospholysine phosphohistidine inorganic pyrophosphate phosphatase OS=Danio rerio OX=7955 GN=lhpp PE=2 SV=1	29625	11	lhpp
tr|E7EZX4|E7EZX4_DANRE	0.373718	1.29569	0.381769	tr|E7EZX4|E7EZX4_DANRE NACHT and WD repeat domain-containing 2 OS=Danio rerio OX=7955 GN=nwd2 PE=4 SV=3	196319	13	nwd2
tr|Q499A0|Q499A0_DANRE	0.373715	1.29569	0.122959	tr|Q499A0|Q499A0_DANRE Transmembrane emp24 protein transport domain containing 9 OS=Danio rerio OX=7955 GN=tmed9 PE=2 SV=1	24227	3	tmed9
tr|E7F882|E7F882_DANRE	0.373532	1.29552	0.336089	tr|E7F882|E7F882_DANRE Regulation of nuclear pre-mRNA domain-containing 1A OS=Danio rerio OX=7955 GN=rprd1a PE=1 SV=1	35388	6	rprd1a
sp|A0JMI9|RRF2M_DANRE	0.373393	1.2954	0.30471	sp|A0JMI9|RRF2M_DANRE Ribosome-releasing factor 2, mitochondrial OS=Danio rerio OX=7955 GN=gfm2 PE=2 SV=2	83643	5	gfm2
tr|E7F836|E7F836_DANRE	0.372992	1.29504	0.447003	tr|E7F836|E7F836_DANRE Rac/Cdc42 guanine nucleotide exchange factor (GEF) 6 OS=Danio rerio OX=7955 GN=arhgef6 PE=4 SV=2	86067	12	arhgef6
tr|B8A5F6|B8A5F6_DANRE	0.372437	1.29454	0.178833	tr|B8A5F6|B8A5F6_DANRE Novel protein similar to vertebrate sorbin and SH3 domain containing 2 (SORBS2) OS=Danio rerio OX=7955 GN=sorbs2b PE=4 SV=1	137972	3	sorbs2b
tr|A0A1D5NT07|A0A1D5NT07_DANRE	0.372209	1.29433	0.208345	tr|A0A1D5NT07|A0A1D5NT07_DANRE Acid phosphatase 2, lysosomal (Fragment) OS=Danio rerio OX=7955 GN=acp2 PE=1 SV=1	42507	5	acp2
tr|Q1L8R5|Q1L8R5_DANRE	0.372147	1.29428	0.485259	tr|Q1L8R5|Q1L8R5_DANRE Calcium channel, voltage-dependent, gamma subunit 8a OS=Danio rerio OX=7955 GN=cacng8a PE=3 SV=1	46176	6	cacng8a
tr|F1Q5U1|F1Q5U1_DANRE	0.37134	1.29355	0.225388	tr|F1Q5U1|F1Q5U1_DANRE Regulatory factor X, 5 OS=Danio rerio OX=7955 GN=rfx5 PE=4 SV=1	64489	4	rfx5
tr|A0A2R8QTG3|A0A2R8QTG3_DANRE	0.370002	1.29235	0.0224486	tr|A0A2R8QTG3|A0A2R8QTG3_DANRE Tripartite motif-containing 25 OS=Danio rerio OX=7955 GN=trim25 PE=1 SV=1	73346	17	trim25
tr|X1WBJ0|X1WBJ0_DANRE	0.369529	1.29193	0.0973172	tr|X1WBJ0|X1WBJ0_DANRE Tripartite motif-containing 65 OS=Danio rerio OX=7955 GN=trim65 PE=4 SV=1	58230	10	trim65
tr|X1WGI7|X1WGI7_DANRE	0.369464	1.29187	0.239458	tr|X1WGI7|X1WGI7_DANRE C-type lectin domain-containing 16A OS=Danio rerio OX=7955 GN=clec16a PE=1 SV=1	104177	8	clec16a
sp|A0JMD0|CLU_DANRE	0.369374	1.29179	0.262623	sp|A0JMD0|CLU_DANRE Clustered mitochondria protein homolog OS=Danio rerio OX=7955 GN=cluh PE=2 SV=1	155810	21	cluh
tr|E7F124|E7F124_DANRE	0.369235	1.29167	0.0481539	tr|E7F124|E7F124_DANRE Adaptor-related protein complex 1-associated regulatory protein OS=Danio rerio OX=7955 GN=ap1ar PE=4 SV=1	33109	1	ap1ar
tr|A0A0G2KF42|A0A0G2KF42_DANRE	0.369181	1.29162	0.280887	tr|A0A0G2KF42|A0A0G2KF42_DANRE Rho guanine nucleotide exchange factor (GEF) 25a OS=Danio rerio OX=7955 GN=arhgef25a PE=4 SV=2	60481	2	arhgef25a
sp|Q6EIG3|CP26B_DANRE	0.367976	1.29054	0.502907	sp|Q6EIG3|CP26B_DANRE Cytochrome P450 26B1 OS=Danio rerio OX=7955 GN=cyp26b1 PE=1 SV=1	57598	9	cyp26b1
tr|A0A0R4IPJ8|A0A0R4IPJ8_DANRE	0.36794	1.29051	0.359554	tr|A0A0R4IPJ8|A0A0R4IPJ8_DANRE Adherens junctions-associated protein 1 OS=Danio rerio OX=7955 GN=ajap1 PE=4 SV=2	42142	5	ajap1
sp|Q4QRC6|ISCA1_DANRE	0.367275	1.28991	0.258099	sp|Q4QRC6|ISCA1_DANRE Iron-sulfur cluster assembly 1 homolog, mitochondrial OS=Danio rerio OX=7955 GN=isca1 PE=2 SV=1	14248	3	isca1
tr|A0A2R8Q7P7|A0A2R8Q7P7_DANRE	0.366751	1.28945	0.17772	tr|A0A2R8Q7P7|A0A2R8Q7P7_DANRE Striatin-interacting protein 2 OS=Danio rerio OX=7955 GN=strip2 PE=3 SV=1	91953	6	strip2
tr|A0A0G2KS58|A0A0G2KS58_DANRE	0.366198	1.28895	0.446046	tr|A0A0G2KS58|A0A0G2KS58_DANRE Transcription activator BRG1-like OS=Danio rerio OX=7955 GN=LOC100535713 PE=3 SV=1	177129	7	LOC100535713
tr|Q6DHH9|Q6DHH9_DANRE	0.366069	1.28884	0.275259	tr|Q6DHH9|Q6DHH9_DANRE Ubiquitin-conjugating enzyme E2R 2 OS=Danio rerio OX=7955 GN=ube2r2 PE=1 SV=1	28224	2	ube2r2
tr|F1R2U1|F1R2U1_DANRE	0.366032	1.2888	0.0919802	tr|F1R2U1|F1R2U1_DANRE Sorting and assembly machinery component 50 homolog,-like OS=Danio rerio OX=7955 GN=samm50l PE=1 SV=1	52218	15	samm50l
tr|A0A0R4IDR4|A0A0R4IDR4_DANRE	0.365756	1.28856	0.122687	tr|A0A0R4IDR4|A0A0R4IDR4_DANRE Si:dkey-57c15.1 (Fragment) OS=Danio rerio OX=7955 GN=si:dkey-57c15.1 PE=3 SV=1	21775	3	si:dkey-57c15.1
tr|X1WEL5|X1WEL5_DANRE	0.365561	1.28838	0.0172411	tr|X1WEL5|X1WEL5_DANRE Ubiquitin protein ligase E3 component n-recognin 4 OS=Danio rerio OX=7955 GN=ubr4 PE=3 SV=2	572699	99	ubr4
tr|A0A286YAZ1|A0A286YAZ1_DANRE	0.365127	1.288	0.0155388	tr|A0A286YAZ1|A0A286YAZ1_DANRE Actin-depolymerizing factor OS=Danio rerio OX=7955 GN=gsna PE=1 SV=1	81496	5	gsna
tr|A0A2R8RKA3|A0A2R8RKA3_DANRE	0.364147	1.28712	0.382885	tr|A0A2R8RKA3|A0A2R8RKA3_DANRE Glutathione transferase OS=Danio rerio OX=7955 GN=gstt1b PE=1 SV=1	28039	6	gstt1b
tr|B3DLJ9|B3DLJ9_DANRE	0.363906	1.28691	0.367521	tr|B3DLJ9|B3DLJ9_DANRE Dsc2l protein OS=Danio rerio OX=7955 GN=dsc2l PE=2 SV=1	95047	5	dsc2l
tr|A0A0R4IPR8|A0A0R4IPR8_DANRE	0.363858	1.28686	0.0966881	tr|A0A0R4IPR8|A0A0R4IPR8_DANRE G protein-coupled receptor kinase-interacting ArfGAP 1 OS=Danio rerio OX=7955 GN=git1 PE=1 SV=1	83501	17	git1
tr|I3ISA6|I3ISA6_DANRE	0.36355	1.28659	0.499932	tr|I3ISA6|I3ISA6_DANRE Epiplakin 1 OS=Danio rerio OX=7955 GN=eppk1 PE=1 SV=1	611719	17	eppk1
tr|A0A2R8QHA1|A0A2R8QHA1_DANRE	0.363524	1.28656	0.428199	tr|A0A2R8QHA1|A0A2R8QHA1_DANRE Protocadherin 2 alpha a 15 OS=Danio rerio OX=7955 GN=pcdh2aa15 PE=4 SV=1	103315	7	pcdh2aa15
tr|A2BIR0|A2BIR0_DANRE	0.363393	1.28645	0.0671416	tr|A2BIR0|A2BIR0_DANRE SEC14-like lipid-binding 8 OS=Danio rerio OX=7955 GN=sec14l8 PE=4 SV=2	45301	7	sec14l8
tr|A0A286YA82|A0A286YA82_DANRE	0.363066	1.28616	0.557412	tr|A0A286YA82|A0A286YA82_DANRE Eukaryotic translation initiation factor 4 gamma, 3b OS=Danio rerio OX=7955 GN=eif4g3b PE=1 SV=2	187277	10	eif4g3b
tr|B3DHR0|B3DHR0_DANRE	0.362822	1.28594	0.409089	tr|B3DHR0|B3DHR0_DANRE Gap junction protein OS=Danio rerio OX=7955 GN=gjd1a PE=2 SV=1	34147	3	gjd1a
tr|A0A286YAZ9|A0A286YAZ9_DANRE	0.362604	1.28574	0.314264	tr|A0A286YAZ9|A0A286YAZ9_DANRE Phosphatidylinositol-binding clathrin assembly protein b OS=Danio rerio OX=7955 GN=picalmb PE=1 SV=2	70505	3	picalmb
tr|A8IYK2|A8IYK2_DANRE	0.362313	1.28549	0.176726	tr|A8IYK2|A8IYK2_DANRE Plexin A1 OS=Danio rerio OX=7955 GN=plxna1b PE=2 SV=1	211756	26	plxna1b
tr|A0A0R4IPY6|A0A0R4IPY6_DANRE	0.362213	1.2854	0.107622	tr|A0A0R4IPY6|A0A0R4IPY6_DANRE Phosphoinositide 5-phosphatase OS=Danio rerio OX=7955 GN=ocrl PE=1 SV=1	109779	12	ocrl
tr|A2BGK0|A2BGK0_DANRE	0.361362	1.28464	0.455276	tr|A2BGK0|A2BGK0_DANRE Phosphatidate cytidylyltransferase OS=Danio rerio OX=7955 GN=cds2 PE=1 SV=1	51097	5	cds2
tr|A0A2R8QL71|A0A2R8QL71_DANRE	0.361211	1.2845	0.293103	tr|A0A2R8QL71|A0A2R8QL71_DANRE UDP-glucose glycoprotein glucosyltransferase 1 OS=Danio rerio OX=7955 GN=uggt1 PE=1 SV=1	176575	39	uggt1
tr|A1L1M6|A1L1M6_DANRE	0.361155	1.28445	0.523258	tr|A1L1M6|A1L1M6_DANRE Cadherin 4, retinal OS=Danio rerio OX=7955 GN=cdh4 PE=2 SV=1	102154	6	cdh4
tr|F1QXS5|F1QXS5_DANRE	0.361091	1.2844	0.326392	tr|F1QXS5|F1QXS5_DANRE TOX high mobility group box family member 4 a OS=Danio rerio OX=7955 GN=tox4a PE=1 SV=1	72043	3	tox4a
tr|F8W2Q8|F8W2Q8_DANRE	0.360702	1.28405	0.256487	tr|F8W2Q8|F8W2Q8_DANRE 5'-nucleotidase OS=Danio rerio OX=7955 GN=nt5c3a PE=3 SV=1	37768	10	nt5c3a
sp|Q6DBY0|NUP85_DANRE	0.360552	1.28392	0.350559	sp|Q6DBY0|NUP85_DANRE Nuclear pore complex protein Nup85 OS=Danio rerio OX=7955 GN=nup85 PE=2 SV=1	74148	5	nup85
tr|E7F5W0|E7F5W0_DANRE	0.36054	1.28391	0.0587558	tr|E7F5W0|E7F5W0_DANRE Non-lysosomal glucosylceramidase OS=Danio rerio OX=7955 GN=gba2 PE=1 SV=3	96543	21	gba2
tr|F1QVV4|F1QVV4_DANRE	0.360449	1.28383	0.439054	tr|F1QVV4|F1QVV4_DANRE Cleavage and polyadenylation specificity factor subunit 2 OS=Danio rerio OX=7955 GN=cpsf2 PE=1 SV=1	89632	9	cpsf2
sp|A3QJU3|COQ8B_DANRE	0.360401	1.28378	0.476209	sp|A3QJU3|COQ8B_DANRE Atypical kinase COQ8B, mitochondrial OS=Danio rerio OX=7955 GN=coq8b PE=3 SV=2	69460	9	coq8b
tr|A0A0R4ICD8|A0A0R4ICD8_DANRE	0.360322	1.28371	0.0989555	tr|A0A0R4ICD8|A0A0R4ICD8_DANRE BTB (POZ) domain-containing 17b (Fragment) OS=Danio rerio OX=7955 GN=btbd17b PE=1 SV=1	53565	15	btbd17b
tr|A7MBY6|A7MBY6_DANRE	0.359635	1.2831	0.346362	tr|A7MBY6|A7MBY6_DANRE Choline/ethanolamine phosphotransferase 1b OS=Danio rerio OX=7955 GN=cept1b PE=1 SV=1	46201	3	cept1b
tr|B8A5U2|B8A5U2_DANRE	0.35951	1.28299	0.254683	tr|B8A5U2|B8A5U2_DANRE WD repeat domain 17 OS=Danio rerio OX=7955 GN=wdr17 PE=4 SV=1	141990	26	wdr17
tr|A5WUM0|A5WUM0_DANRE	0.358955	1.2825	0.13957	tr|A5WUM0|A5WUM0_DANRE Acetyl-CoA carboxylase kinase OS=Danio rerio OX=7955 GN=prkaa1 PE=1 SV=1	65021	11	prkaa1
tr|B0S642|B0S642_DANRE	0.358941	1.28248	0.100478	tr|B0S642|B0S642_DANRE 3-hydroxyisobutyryl-CoA hydrolase, mitochondrial OS=Danio rerio OX=7955 GN=hibch PE=1 SV=1	42413	3	hibch
tr|F1QFV2|F1QFV2_DANRE	0.358909	1.28246	0.128485	tr|F1QFV2|F1QFV2_DANRE Heterogeneous nuclear ribonucleoprotein A1b OS=Danio rerio OX=7955 GN=hnrnpa1b PE=1 SV=1	40529	9	hnrnpa1b
tr|A2BHA3|A2BHA3_DANRE	0.358841	1.2824	0.409728	tr|A2BHA3|A2BHA3_DANRE Creatine kinase OS=Danio rerio OX=7955 GN=ckma PE=1 SV=1	42815	7	ckma
tr|F1R166|F1R166_DANRE	0.35882	1.28238	0.541967	tr|F1R166|F1R166_DANRE RNA helicase OS=Danio rerio OX=7955 GN=eif4a2 PE=1 SV=1	46818	8	eif4a2
tr|X1WHG1|X1WHG1_DANRE	0.358423	1.28202	0.224976	tr|X1WHG1|X1WHG1_DANRE Diacylglycerol kinase OS=Danio rerio OX=7955 GN=dgkzb PE=3 SV=1	118222	7	dgkzb
tr|A0A0R4IXC2|A0A0R4IXC2_DANRE	0.358093	1.28173	0.0963241	tr|A0A0R4IXC2|A0A0R4IXC2_DANRE Septin 9b OS=Danio rerio OX=7955 GN=sept9b PE=3 SV=2	53449	9	sept9b
tr|Q6P4V2|Q6P4V2_DANRE	0.357602	1.28129	0.103513	tr|Q6P4V2|Q6P4V2_DANRE Amino acid transporter OS=Danio rerio OX=7955 GN=slc1a3a PE=1 SV=1	58822	4	slc1a3a
tr|Q6TH05|Q6TH05_DANRE	0.357473	1.28118	0.116765	tr|Q6TH05|Q6TH05_DANRE GABA(A) receptor-associated protein-like 2 OS=Danio rerio OX=7955 GN=gabarapl2 PE=2 SV=1	13711	6	gabarapl2
tr|F1Q6Y6|F1Q6Y6_DANRE	0.356866	1.28064	0.640745	tr|F1Q6Y6|F1Q6Y6_DANRE Remodeling and spacing factor 1b, tandem duplicate 1 OS=Danio rerio OX=7955 GN=rsf1b.1 PE=1 SV=2	215646	4	rsf1b.1
tr|Q6DRF8|Q6DRF8_DANRE	0.356393	1.28022	0.103423	tr|Q6DRF8|Q6DRF8_DANRE Pre-mRNA-splicing factor 3 OS=Danio rerio OX=7955 GN=prpf3 PE=1 SV=1	78893	12	prpf3
sp|Q6DGP2|SYF2_DANRE	0.35615	1.28001	0.352027	sp|Q6DGP2|SYF2_DANRE Pre-mRNA-splicing factor syf2 OS=Danio rerio OX=7955 GN=syf2 PE=2 SV=1	28309	2	syf2
tr|A0A2R8PVX9|A0A2R8PVX9_DANRE	0.355939	1.27982	0.0113152	tr|A0A2R8PVX9|A0A2R8PVX9_DANRE Plectin a OS=Danio rerio OX=7955 GN=pleca PE=1 SV=1	522803	154	pleca
tr|X1WBG0|X1WBG0_DANRE	0.355846	1.27974	0.183918	tr|X1WBG0|X1WBG0_DANRE Guanine nucleotide-binding protein subunit gamma OS=Danio rerio OX=7955 GN=si:dkey-204f11.64 PE=3 SV=1	7613	1	si:dkey-204f11.64
sp|Q568K5|NAA40_DANRE	0.355663	1.27957	0.0357837	sp|Q568K5|NAA40_DANRE N-alpha-acetyltransferase 40 OS=Danio rerio OX=7955 GN=naa40 PE=2 SV=1	27356	6	naa40
tr|A0A140LFT0|A0A140LFT0_DANRE	0.35563	1.27954	0.0795065	tr|A0A140LFT0|A0A140LFT0_DANRE Dual-specificity phosphatase 19b OS=Danio rerio OX=7955 GN=dusp19b PE=4 SV=1	22509	2	dusp19b
tr|Q1L8B0|Q1L8B0_DANRE	0.354774	1.27879	0.122208	tr|Q1L8B0|Q1L8B0_DANRE Sorting nexin 27a OS=Danio rerio OX=7955 GN=snx27a PE=1 SV=1	64351	10	snx27a
tr|A1L1W6|A1L1W6_DANRE	0.354675	1.2787	0.214427	tr|A1L1W6|A1L1W6_DANRE Zgc:158466 OS=Danio rerio OX=7955 GN=trappc12 PE=2 SV=1	84475	16	trappc12
tr|E9QB40|E9QB40_DANRE	0.354443	1.27849	0.099475	tr|E9QB40|E9QB40_DANRE Solute carrier organic anion transporter family member 5A1a (Fragment) OS=Danio rerio OX=7955 GN=slco5a1a PE=4 SV=1	42221	10	slco5a1a
tr|A0A286Y8J6|A0A286Y8J6_DANRE	0.354431	1.27848	0.086981	tr|A0A286Y8J6|A0A286Y8J6_DANRE Eukaryotic translation initiation factor 2B, subunit 4 delta OS=Danio rerio OX=7955 GN=eif2b4 PE=1 SV=1	61225	16	eif2b4
tr|F1Q8T8|F1Q8T8_DANRE	0.354366	1.27842	0.131556	tr|F1Q8T8|F1Q8T8_DANRE Reticulon OS=Danio rerio OX=7955 GN=rtn1a PE=1 SV=2	21476	1	rtn1a
tr|F1R2T5|F1R2T5_DANRE	0.354226	1.2783	0.0407763	tr|F1R2T5|F1R2T5_DANRE UHRF1-binding protein 1-like OS=Danio rerio OX=7955 GN=uhrf1bp1l PE=1 SV=3	155640	22	uhrf1bp1l
tr|E7FBE5|E7FBE5_DANRE	0.354134	1.27822	0.0671731	tr|E7FBE5|E7FBE5_DANRE Clathrin heavy chain OS=Danio rerio OX=7955 GN=cltcl1 PE=1 SV=3	186488	33	cltcl1
tr|B0CM02|B0CM02_DANRE	0.354079	1.27817	0.139944	tr|B0CM02|B0CM02_DANRE Amyloid-beta A4 protein (Fragment) OS=Danio rerio OX=7955 GN=appb PE=2 SV=1	76041	7	appb
tr|A1L2D9|A1L2D9_DANRE	0.353827	1.27795	0.0287876	tr|A1L2D9|A1L2D9_DANRE LOC557557 protein (Fragment) OS=Danio rerio OX=7955 GN=cfi PE=2 SV=1	69384	1	cfi
tr|Q5C8U6|Q5C8U6_DANRE	0.352559	1.27682	0.320202	tr|Q5C8U6|Q5C8U6_DANRE PAC1 receptor Hop1 isoform OS=Danio rerio OX=7955 GN=adcyap1r1a PE=2 SV=1	55092	2	adcyap1r1a
tr|B0V3M5|B0V3M5_DANRE	0.352409	1.27669	0.507496	tr|B0V3M5|B0V3M5_DANRE Nicotinamide-nucleotide adenylyltransferase OS=Danio rerio OX=7955 GN=nmnat3 PE=3 SV=1	28303	6	nmnat3
tr|E7F822|E7F822_DANRE	0.352338	1.27663	0.221918	tr|E7F822|E7F822_DANRE Si:dkeyp-110a12.4 OS=Danio rerio OX=7955 GN=si:dkeyp-110a12.4 PE=4 SV=1	43260	4	si:dkeyp-110a12.4
tr|A0A2R8QDT8|A0A2R8QDT8_DANRE	0.352252	1.27655	0.45928	tr|A0A2R8QDT8|A0A2R8QDT8_DANRE Calcium channel, voltage-dependent, alpha 2/delta subunit 1a OS=Danio rerio OX=7955 GN=cacna2d1a PE=1 SV=1	127971	10	cacna2d1a
tr|Q7ZU33|Q7ZU33_DANRE	0.35217	1.27648	0.130569	tr|Q7ZU33|Q7ZU33_DANRE Non-specific serine/threonine protein kinase OS=Danio rerio OX=7955 GN=csnk2a2a PE=1 SV=1	40863	10	csnk2a2a
sp|Q5BLE2|MIGA2_DANRE	0.352057	1.27638	0.285483	sp|Q5BLE2|MIGA2_DANRE Mitoguardin 2 OS=Danio rerio OX=7955 GN=miga2 PE=2 SV=1	66256	5	miga2
tr|Q502E4|Q502E4_DANRE	0.352014	1.27634	0.102287	tr|Q502E4|Q502E4_DANRE NADH dehydrogenase [ubiquinone] iron-sulfur protein 4, mitochondrial OS=Danio rerio OX=7955 GN=ndufs4 PE=1 SV=1	19005	7	ndufs4
tr|A0A2R8Q220|A0A2R8Q220_DANRE	0.351729	1.27609	0.29332	tr|A0A2R8Q220|A0A2R8Q220_DANRE Replication timing regulatory factor 1 OS=Danio rerio OX=7955 GN=rif1 PE=1 SV=1	262995	13	rif1
tr|A0A2R8QJ57|A0A2R8QJ57_DANRE	0.351668	1.27603	0.0769212	tr|A0A2R8QJ57|A0A2R8QJ57_DANRE Si:ch1073-55a19.2 OS=Danio rerio OX=7955 GN=ranbp2 PE=1 SV=1	326740	38	ranbp2
tr|Q6IQ66|Q6IQ66_DANRE	0.351592	1.27597	0.264732	tr|Q6IQ66|Q6IQ66_DANRE Nudix (nucleoside diphosphate-linked moiety X)-type motif 5 OS=Danio rerio OX=7955 GN=nudt5 PE=1 SV=1	24011	7	nudt5
tr|E7F7P8|E7F7P8_DANRE	0.350514	1.27502	0.278456	tr|E7F7P8|E7F7P8_DANRE Proline-rich transmembrane protein 4 OS=Danio rerio OX=7955 GN=prrt4 PE=4 SV=1	94460	1	prrt4
tr|F1QEF1|F1QEF1_DANRE	0.350485	1.27499	0.357047	tr|F1QEF1|F1QEF1_DANRE UDP-glucuronosyltransferase OS=Danio rerio OX=7955 GN=ugt1b1 PE=1 SV=2	59655	6	ugt1b1
tr|F1QM62|F1QM62_DANRE	0.349838	1.27442	0.441476	tr|F1QM62|F1QM62_DANRE Sorting nexin 13 OS=Danio rerio OX=7955 GN=snx13 PE=3 SV=3	110954	5	snx13
tr|Q66HU7|Q66HU7_DANRE	0.349512	1.27413	0.236449	tr|Q66HU7|Q66HU7_DANRE Peroxisomal membrane protein 2 OS=Danio rerio OX=7955 GN=pxmp2 PE=1 SV=1	22335	1	pxmp2
tr|A1L1R7|A1L1R7_DANRE	0.349265	1.27391	0.268527	tr|A1L1R7|A1L1R7_DANRE Aldehyde dehydrogenase 16 family, member A1 OS=Danio rerio OX=7955 GN=aldh16a1 PE=2 SV=1	83135	1	aldh16a1
tr|A0A0R4ITC8|A0A0R4ITC8_DANRE	0.348456	1.2732	0.0599341	tr|A0A0R4ITC8|A0A0R4ITC8_DANRE Spartin b OS=Danio rerio OX=7955 GN=spartb PE=1 SV=1	62999	8	spartb
tr|A8WFU6|A8WFU6_DANRE	0.348398	1.27315	0.109847	tr|A8WFU6|A8WFU6_DANRE Collagen-binding protein OS=Danio rerio OX=7955 GN=serpinh1a PE=1 SV=1	44974	6	serpinh1a
sp|Q6NZZ9|RBM22_DANRE	0.348136	1.27291	0.534585	sp|Q6NZZ9|RBM22_DANRE Pre-mRNA-splicing factor RBM22 OS=Danio rerio OX=7955 GN=rbm22 PE=2 SV=1	47440	9	rbm22
tr|A0A0R4IR18|A0A0R4IR18_DANRE	0.348014	1.27281	0.176575	tr|A0A0R4IR18|A0A0R4IR18_DANRE Thyroid hormone receptor interactor 4 OS=Danio rerio OX=7955 GN=trip4 PE=1 SV=1	64132	3	trip4
tr|B2CZC5|B2CZC5_DANRE	0.347705	1.27254	0.36232	tr|B2CZC5|B2CZC5_DANRE Sodium/calcium exchanger 3 OS=Danio rerio OX=7955 GN=slc8a3 PE=2 SV=1	102342	5	slc8a3
tr|A0A0G2L6L8|A0A0G2L6L8_DANRE	0.347198	1.27209	0.530398	tr|A0A0G2L6L8|A0A0G2L6L8_DANRE Receptor protein-tyrosine kinase OS=Danio rerio OX=7955 PE=1 SV=2	55988	4	Uncharacterized protein
tr|B7ZUZ8|B7ZUZ8_DANRE	0.346456	1.27143	0.376245	tr|B7ZUZ8|B7ZUZ8_DANRE TBC1 domain family member 23 OS=Danio rerio OX=7955 GN=tbc1d23 PE=1 SV=1	76122	5	tbc1d23
tr|Q5EB19|Q5EB19_DANRE	0.346142	1.27116	0.199018	tr|Q5EB19|Q5EB19_DANRE Ring finger protein 7 OS=Danio rerio OX=7955 GN=rnf7 PE=1 SV=1	12703	3	rnf7
tr|F1QDB3|F1QDB3_DANRE	0.345934	1.27097	0.184967	tr|F1QDB3|F1QDB3_DANRE Zgc:92630 OS=Danio rerio OX=7955 GN=dhrs11b.2 PE=1 SV=1	27802	8	dhrs11b.2
tr|Q7T294|Q7T294_DANRE	0.345688	1.27076	0.300236	tr|Q7T294|Q7T294_DANRE Disintegrin and metalloproteinase domain-containing protein 10 OS=Danio rerio OX=7955 GN=adam10b PE=2 SV=1	87240	6	adam10b
tr|E9QBW8|E9QBW8_DANRE	0.345332	1.27044	0.245741	tr|E9QBW8|E9QBW8_DANRE Stress-activated protein kinase JNK OS=Danio rerio OX=7955 GN=mapk8a PE=1 SV=1	48440	2	mapk8a
tr|B8JIY2|B8JIY2_DANRE	0.345146	1.27028	0.273229	tr|B8JIY2|B8JIY2_DANRE Nucleolar and coiled-body phosphoprotein 1 OS=Danio rerio OX=7955 GN=nolc1 PE=1 SV=1	102032	8	nolc1
sp|Q58EE9|GFAP_DANRE	0.345106	1.27024	0.00854487	sp|Q58EE9|GFAP_DANRE Glial fibrillary acidic protein OS=Danio rerio OX=7955 GN=gfap PE=1 SV=2	51249	10	gfap
tr|A0A286Y8I7|A0A286Y8I7_DANRE	0.344519	1.26973	0.0288718	tr|A0A286Y8I7|A0A286Y8I7_DANRE Calcium/calmodulin-dependent protein kinase OS=Danio rerio OX=7955 GN=camk2b2 PE=1 SV=2	43378	6	camk2b2
tr|E7FFI3|E7FFI3_DANRE	0.344301	1.26954	0.493953	tr|E7FFI3|E7FFI3_DANRE Dpy-19-like C-mannosyltransferase 3 OS=Danio rerio OX=7955 GN=dpy19l3 PE=3 SV=1	83400	7	dpy19l3
tr|A0A2R8QL35|A0A2R8QL35_DANRE	0.344209	1.26945	0.0323637	tr|A0A2R8QL35|A0A2R8QL35_DANRE Tyrosine-protein phosphatase non-receptor type OS=Danio rerio OX=7955 GN=ptpn11a PE=1 SV=1	68168	12	ptpn11a
sp|Q5XIX8|BORC5_DANRE	0.343948	1.26923	0.394466	sp|Q5XIX8|BORC5_DANRE BLOC-1-related complex subunit 5 OS=Danio rerio OX=7955 GN=borcs5 PE=2 SV=1	23544	3	borcs5
tr|F1QKJ4|F1QKJ4_DANRE	0.343673	1.26898	0.439203	tr|F1QKJ4|F1QKJ4_DANRE FERM and PDZ domain-containing 3 OS=Danio rerio OX=7955 GN=frmpd3 PE=4 SV=2	187855	7	frmpd3
tr|A0A2R8Q6G5|A0A2R8Q6G5_DANRE	0.343584	1.26891	0.0529182	tr|A0A2R8Q6G5|A0A2R8Q6G5_DANRE Acetyl-coenzyme A synthetase OS=Danio rerio OX=7955 GN=acss2 PE=1 SV=1	76614	24	acss2
tr|B8A518|B8A518_DANRE	0.34348	1.26881	0.358111	tr|B8A518|B8A518_DANRE Tubulin alpha chain OS=Danio rerio OX=7955 GN=tuba1c PE=3 SV=1	50180	0	tuba1c
tr|A0A0B5JQ03|A0A0B5JQ03_DANRE	0.343266	1.26863	0.104068	tr|A0A0B5JQ03|A0A0B5JQ03_DANRE Clusterin (Fragment) OS=Danio rerio OX=7955 GN=clu PE=2 SV=1	51891	1	clu
sp|A4FUN7|UBP12_DANRE	0.342816	1.26823	0.182252	sp|A4FUN7|UBP12_DANRE Ubiquitin carboxyl-terminal hydrolase 12A OS=Danio rerio OX=7955 GN=usp12a PE=2 SV=1	43027	2	usp12a
tr|Q4V914|Q4V914_DANRE	0.342603	1.26804	0.427906	tr|Q4V914|Q4V914_DANRE Core histone macro-H2A OS=Danio rerio OX=7955 GN=macroh2a2 PE=1 SV=1	39864	18	macroh2a2
tr|A0A286Y8A3|A0A286Y8A3_DANRE	0.342539	1.26799	0.210901	tr|A0A286Y8A3|A0A286Y8A3_DANRE SH2B adaptor protein 2 OS=Danio rerio OX=7955 GN=sh2b2 PE=3 SV=1	70469	4	sh2b2
tr|Q6DHL2|Q6DHL2_DANRE	0.342173	1.26766	0.469215	tr|Q6DHL2|Q6DHL2_DANRE VPS26 endosomal protein sorting factor C OS=Danio rerio OX=7955 GN=vps26c PE=1 SV=1	33348	5	vps26c
tr|A0A0R4IUL3|A0A0R4IUL3_DANRE	0.341555	1.26712	0.087886	tr|A0A0R4IUL3|A0A0R4IUL3_DANRE Si:dkey-30j16.3 OS=Danio rerio OX=7955 GN=si:dkey-30j16.3 PE=3 SV=2	29810	4	si:dkey-30j16.3
tr|A0A0R4J8N1|A0A0R4J8N1_DANRE	0.34126	1.26686	0.392103	tr|A0A0R4J8N1|A0A0R4J8N1_DANRE CAP-GLY domain-containing linker protein 3 OS=Danio rerio OX=7955 GN=clip3 PE=4 SV=1	59236	3	clip3
tr|Q802Z3|Q802Z3_DANRE	0.340598	1.26628	0.143902	tr|Q802Z3|Q802Z3_DANRE Phosphatidylinositol transfer protein, beta,-like OS=Danio rerio OX=7955 GN=pitpnbl PE=1 SV=1	31687	7	pitpnbl
tr|Q6NYH5|Q6NYH5_DANRE	0.34032	1.26604	0.079959	tr|Q6NYH5|Q6NYH5_DANRE Sodium/potassium-transporting ATPase subunit beta OS=Danio rerio OX=7955 GN=atp1b1a PE=2 SV=1	35173	1	atp1b1a
tr|B8A453|B8A453_DANRE	0.339687	1.26548	0.0615644	tr|B8A453|B8A453_DANRE RAB23, member RAS oncogene family OS=Danio rerio OX=7955 GN=rab23 PE=4 SV=1	26924	9	rab23
tr|E7F2B6|E7F2B6_DANRE	0.33929	1.26513	0.408985	tr|E7F2B6|E7F2B6_DANRE Poly(ADP-ribose) glycohydrolase OS=Danio rerio OX=7955 GN=parga PE=1 SV=1	86980	10	parga
tr|Q6DGI1|Q6DGI1_DANRE	0.339217	1.26507	0.35462	tr|Q6DGI1|Q6DGI1_DANRE Zgc:92912 OS=Danio rerio OX=7955 GN=zgc:92912 PE=1 SV=1	12760	6	zgc:92912
sp|Q66HY8|PDXD1_DANRE	0.339214	1.26507	0.485152	sp|Q66HY8|PDXD1_DANRE Pyridoxal-dependent decarboxylase domain-containing protein 1 OS=Danio rerio OX=7955 GN=pdxdc1 PE=2 SV=1	83141	5	pdxdc1
tr|B9X2H6|B9X2H6_DANRE	0.338968	1.26485	0.570006	tr|B9X2H6|B9X2H6_DANRE Cyclin dependent kinase like 5 long OS=Danio rerio OX=7955 GN=cdkl5 PE=2 SV=1	121127	7	cdkl5
tr|B8JKN7|B8JKN7_DANRE	0.338843	1.26474	0.137159	tr|B8JKN7|B8JKN7_DANRE Peptidyl-prolyl cis-trans isomerase OS=Danio rerio OX=7955 GN=ppiaa PE=1 SV=1	10819	2	ppiaa
tr|Q7ZUI3|Q7ZUI3_DANRE	0.338764	1.26467	0.368314	tr|Q7ZUI3|Q7ZUI3_DANRE Tetratricopeptide repeat domain 9C OS=Danio rerio OX=7955 GN=ttc9c PE=1 SV=1	24206	5	ttc9c
sp|Q503V1|CYBR1_DANRE	0.338628	1.26455	0.128092	sp|Q503V1|CYBR1_DANRE Plasma membrane ascorbate-dependent reductase CYBRD1 OS=Danio rerio OX=7955 GN=cybrd1 PE=2 SV=1	27905	1	cybrd1
sp|Q6IQH6|PLPR1_DANRE	0.338068	1.26406	0.52969	sp|Q6IQH6|PLPR1_DANRE Phospholipid phosphatase-related protein type 1 OS=Danio rerio OX=7955 GN=plppr1 PE=2 SV=1	36492	3	plppr1
tr|A0A0G2L109|A0A0G2L109_DANRE	0.337585	1.26364	0.664174	tr|A0A0G2L109|A0A0G2L109_DANRE Unc-13 homolog Bb (C. elegans) OS=Danio rerio OX=7955 GN=unc13bb PE=4 SV=2	178409	1	unc13bb
tr|A5PM68|A5PM68_DANRE	0.337315	1.2634	0.104482	tr|A5PM68|A5PM68_DANRE Polypyrimidine tract-binding protein 2b OS=Danio rerio OX=7955 GN=ptbp2b PE=1 SV=1	58127	13	ptbp2b
sp|Q71PD7|H2AV_DANRE	0.337062	1.26318	0.42518	sp|Q71PD7|H2AV_DANRE Histone H2A.V OS=Danio rerio OX=7955 GN=h2az2a PE=2 SV=3	13509	5	h2az2a
sp|Q5XJD3|FIP1_DANRE	0.336989	1.26312	0.400711	sp|Q5XJD3|FIP1_DANRE Pre-mRNA 3'-end-processing factor FIP1 OS=Danio rerio OX=7955 GN=fip1l1 PE=1 SV=1	62966	5	fip1l1
sp|B6ZK76|IRL1A_DANRE	0.336751	1.26291	0.0959356	sp|B6ZK76|IRL1A_DANRE Interleukin-1 receptor accessory protein-like 1-A OS=Danio rerio OX=7955 GN=il1rapl1a PE=2 SV=1	79647	11	il1rapl1a
tr|F1QXF5|F1QXF5_DANRE	0.336717	1.26288	0.487278	tr|F1QXF5|F1QXF5_DANRE Sodium channel protein OS=Danio rerio OX=7955 GN=scn1lab PE=3 SV=1	226393	8	scn1lab
tr|F1Q9F3|F1Q9F3_DANRE	0.336485	1.26268	0.295443	tr|F1Q9F3|F1Q9F3_DANRE Phosphatidylinositol 3-kinase catalytic subunit type 3 OS=Danio rerio OX=7955 GN=pik3c3 PE=1 SV=1	100258	12	pik3c3
tr|E9QEY2|E9QEY2_DANRE	0.336417	1.26262	0.26331	tr|E9QEY2|E9QEY2_DANRE Ubiquitin-like modifier-activating enzyme 1 (Fragment) OS=Danio rerio OX=7955 GN=uba1 PE=1 SV=8	21298	1	uba1
tr|I3ISM5|I3ISM5_DANRE	0.336402	1.2626	0.300634	tr|I3ISM5|I3ISM5_DANRE RNA-binding fox-1 homolog 3b OS=Danio rerio OX=7955 GN=rbfox3b PE=4 SV=3	33131	1	rbfox3b
tr|E7FFE8|E7FFE8_DANRE	0.335833	1.26211	0.203848	tr|E7FFE8|E7FFE8_DANRE 5'-nucleotidase domain-containing 3 OS=Danio rerio OX=7955 GN=nt5dc3 PE=1 SV=1	67515	11	nt5dc3
tr|A8BB44|A8BB44_DANRE	0.335815	1.26209	0.0783525	tr|A8BB44|A8BB44_DANRE cDNA, clone cssl:d0342 (Fragment) OS=Danio rerio OX=7955 GN=lingo1a PE=2 SV=1	62431	8	lingo1a
tr|Q7ZTU4|Q7ZTU4_DANRE	0.335474	1.26179	0.246063	tr|Q7ZTU4|Q7ZTU4_DANRE Platelet-activating factor acetylhydrolase, isoform Ib, gamma subunit OS=Danio rerio OX=7955 GN=pafah1b3 PE=1 SV=1	24519	6	pafah1b3
tr|F1RDH4|F1RDH4_DANRE	0.335218	1.26157	0.425663	tr|F1RDH4|F1RDH4_DANRE Negative elongation factor complex member B OS=Danio rerio OX=7955 GN=nelfb PE=1 SV=1	66418	7	nelfb
tr|Q66I01|Q66I01_DANRE	0.335075	1.26144	0.579266	tr|Q66I01|Q66I01_DANRE Carnitine acetyltransferase OS=Danio rerio OX=7955 GN=cratb PE=2 SV=1	68341	1	cratb
sp|Q7ZWC4|PELO_DANRE	0.334605	1.26103	0.354896	sp|Q7ZWC4|PELO_DANRE Protein pelota homolog OS=Danio rerio OX=7955 GN=pelo PE=2 SV=1	43081	6	pelo
tr|Q4V8Z4|Q4V8Z4_DANRE	0.334537	1.26097	0.13751	tr|Q4V8Z4|Q4V8Z4_DANRE Zgc:114075 OS=Danio rerio OX=7955 GN=snx1b PE=2 SV=1	59456	17	snx1b
tr|Q0P4G1|Q0P4G1_DANRE	0.334479	1.26092	0.0392483	tr|Q0P4G1|Q0P4G1_DANRE Dynein light chain (Fragment) OS=Danio rerio OX=7955 GN=dynll2a PE=2 SV=1	14305	5	dynll2a
tr|A2AV32|A2AV32_DANRE	0.334215	1.26069	0.302521	tr|A2AV32|A2AV32_DANRE SH3 and multiple ankyrin repeat domains 2b OS=Danio rerio OX=7955 GN=shank2b PE=3 SV=2	196392	23	shank2b
tr|A4FVM4|A4FVM4_DANRE	0.333996	1.2605	0.368737	tr|A4FVM4|A4FVM4_DANRE Terpene cyclase/mutase family member OS=Danio rerio OX=7955 GN=lss PE=2 SV=1	83667	7	lss
tr|A0A0R4IZG6|A0A0R4IZG6_DANRE	0.33389	1.26041	0.252995	tr|A0A0R4IZG6|A0A0R4IZG6_DANRE Polypyrimidine tract-binding protein 2a OS=Danio rerio OX=7955 GN=ptbp2a PE=1 SV=1	55402	7	ptbp2a
tr|A0A2R8Q6Q2|A0A2R8Q6Q2_DANRE	0.333573	1.26013	0.304892	tr|A0A2R8Q6Q2|A0A2R8Q6Q2_DANRE LIM domain-containing protein OS=Danio rerio OX=7955 GN=lims1 PE=1 SV=1	37217	4	lims1
tr|A0A0R4IJ40|A0A0R4IJ40_DANRE	0.333557	1.26012	0.173353	tr|A0A0R4IJ40|A0A0R4IJ40_DANRE Agrin OS=Danio rerio OX=7955 GN=agrn PE=1 SV=1	208338	4	agrn
tr|A0A2R8Q307|A0A2R8Q307_DANRE	0.333385	1.25997	0.168543	tr|A0A2R8Q307|A0A2R8Q307_DANRE Forkhead box J3 OS=Danio rerio OX=7955 GN=foxj3 PE=4 SV=1	66154	5	foxj3
tr|A0A0R4IDB7|A0A0R4IDB7_DANRE	0.333275	1.25987	0.291489	tr|A0A0R4IDB7|A0A0R4IDB7_DANRE Non-specific serine/threonine protein kinase OS=Danio rerio OX=7955 GN=cdc42bpaa PE=1 SV=1	191905	5	cdc42bpaa
sp|Q6DHN0|TMM53_DANRE	0.33282	1.25947	0.0415875	sp|Q6DHN0|TMM53_DANRE Transmembrane protein 53 OS=Danio rerio OX=7955 GN=tmem53 PE=2 SV=1	32512	1	tmem53
tr|B0UYQ8|B0UYQ8_DANRE	0.332727	1.25939	0.480959	tr|B0UYQ8|B0UYQ8_DANRE Si:dkey-67c22.2 OS=Danio rerio OX=7955 GN=si:dkey-67c22.2 PE=1 SV=1	121076	6	si:dkey-67c22.2
tr|F1QC03|F1QC03_DANRE	0.332713	1.25938	0.551955	tr|F1QC03|F1QC03_DANRE Zyxin OS=Danio rerio OX=7955 GN=zyx PE=1 SV=1	64603	4	zyx
tr|Q6DG42|Q6DG42_DANRE	0.332126	1.25887	0.117462	tr|Q6DG42|Q6DG42_DANRE Non-specific serine/threonine protein kinase OS=Danio rerio OX=7955 GN=pak2a PE=1 SV=1	57308	4	pak2a
sp|Q6P7Y3|PR38B_DANRE	0.332125	1.25887	0.493356	sp|Q6P7Y3|PR38B_DANRE Pre-mRNA-splicing factor 38B OS=Danio rerio OX=7955 GN=prpf38b PE=2 SV=1	59477	4	prpf38b
tr|A9JRY8|A9JRY8_DANRE	0.331473	1.2583	0.232741	tr|A9JRY8|A9JRY8_DANRE Rac family small GTPase 3b OS=Danio rerio OX=7955 GN=rac3b PE=1 SV=1	21457	2	rac3b
tr|A0A0R4IT88|A0A0R4IT88_DANRE	0.331369	1.25821	0.455296	tr|A0A0R4IT88|A0A0R4IT88_DANRE RAB6B, member RAS oncogene family a OS=Danio rerio OX=7955 GN=rab6ba PE=1 SV=1	24252	4	rab6ba
tr|A0A0B5JF91|A0A0B5JF91_DANRE	0.329374	1.25647	0.149913	tr|A0A0B5JF91|A0A0B5JF91_DANRE Manf (Fragment) OS=Danio rerio OX=7955 GN=manf PE=2 SV=1	20159	6	manf
tr|E9QGG9|E9QGG9_DANRE	0.329221	1.25633	0.105895	tr|E9QGG9|E9QGG9_DANRE Transferrin receptor 1b OS=Danio rerio OX=7955 GN=tfr1b PE=1 SV=1	85391	1	tfr1b
tr|F1Q8Z1|F1Q8Z1_DANRE	0.328908	1.25606	0.162121	tr|F1Q8Z1|F1Q8Z1_DANRE Dedicator of cytokinesis 7 OS=Danio rerio OX=7955 GN=dock7 PE=1 SV=1	241705	39	dock7
tr|A0A0R4IUL0|A0A0R4IUL0_DANRE	0.328701	1.25588	0.493035	tr|A0A0R4IUL0|A0A0R4IUL0_DANRE Peptidylprolyl isomerase OS=Danio rerio OX=7955 GN=fkbp15b PE=1 SV=1	133876	8	fkbp15b
tr|Q6NUW4|Q6NUW4_DANRE	0.328669	1.25585	0.120013	tr|Q6NUW4|Q6NUW4_DANRE Dimethylargininase OS=Danio rerio OX=7955 GN=zgc:85829 PE=2 SV=1	28608	11	zgc:85829
tr|E7F429|E7F429_DANRE	0.328252	1.25549	0.154567	tr|E7F429|E7F429_DANRE Si:dkeyp-121d4.3 OS=Danio rerio OX=7955 GN=si:dkeyp-121d4.3 PE=1 SV=1	227022	7	si:dkeyp-121d4.3
tr|E7FEI6|E7FEI6_DANRE	0.32765	1.25497	0.214032	tr|E7FEI6|E7FEI6_DANRE Rho GTPase-activating protein 4b OS=Danio rerio OX=7955 GN=arhgap4b PE=4 SV=2	108023	27	arhgap4b
tr|A0A0R4IDZ8|A0A0R4IDZ8_DANRE	0.327539	1.25487	0.196648	tr|A0A0R4IDZ8|A0A0R4IDZ8_DANRE Talin 1 OS=Danio rerio OX=7955 GN=tln1 PE=1 SV=1	271428	2	tln1
sp|Q6DRG7|MYPT1_DANRE	0.32715	1.25453	0.145488	sp|Q6DRG7|MYPT1_DANRE Protein phosphatase 1 regulatory subunit 12A OS=Danio rerio OX=7955 GN=ppp1r12a PE=2 SV=2	117322	18	ppp1r12a
tr|F1QHJ3|F1QHJ3_DANRE	0.327017	1.25442	0.119489	tr|F1QHJ3|F1QHJ3_DANRE Guanine nucleotide-binding protein (G protein), alpha 13b OS=Danio rerio OX=7955 GN=gna13b PE=1 SV=1	44167	7	gna13b
tr|I3ITH2|I3ITH2_DANRE	0.32666	1.25411	0.19169	tr|I3ITH2|I3ITH2_DANRE Kinesin light chain OS=Danio rerio OX=7955 GN=klc4 PE=1 SV=1	69867	4	klc4
sp|Q7T321|KCMF1_DANRE	0.326499	1.25397	0.356192	sp|Q7T321|KCMF1_DANRE E3 ubiquitin-protein ligase KCMF1 OS=Danio rerio OX=7955 GN=kcmf1 PE=2 SV=1	42048	2	kcmf1
sp|Q6NZ09|ADRM1_DANRE	0.326175	1.25369	0.505767	sp|Q6NZ09|ADRM1_DANRE Proteasomal ubiquitin receptor ADRM1 OS=Danio rerio OX=7955 GN=adrm1b PE=1 SV=1	42596	5	adrm1b
tr|Q5RG20|Q5RG20_DANRE	0.325462	1.25307	0.569913	tr|Q5RG20|Q5RG20_DANRE ArfGAP with SH3 domain, ankyrin repeat and PH domain 2a OS=Danio rerio OX=7955 GN=asap2a PE=1 SV=1	110988	8	asap2a
tr|B0R0J5|B0R0J5_DANRE	0.325305	1.25293	0.541824	tr|B0R0J5|B0R0J5_DANRE RING-type E3 ubiquitin transferase OS=Danio rerio OX=7955 GN=mgrn1b PE=4 SV=1	60348	4	mgrn1b
tr|F1R7J0|F1R7J0_DANRE	0.325138	1.25278	0.572474	tr|F1R7J0|F1R7J0_DANRE UDP-N-acetylhexosamine pyrophosphorylase-like protein 1 OS=Danio rerio OX=7955 GN=uap1l1 PE=1 SV=1	56497	8	uap1l1
tr|A0A0F7C9F3|A0A0F7C9F3_DANRE	0.324896	1.25257	0.356534	tr|A0A0F7C9F3|A0A0F7C9F3_DANRE IQGAP1 protein OS=Danio rerio OX=7955 GN=iqgap1 PE=2 SV=1	188531	19	iqgap1
tr|Q6TNR8|Q6TNR8_DANRE	0.32486	1.25254	0.177667	tr|Q6TNR8|Q6TNR8_DANRE 6-phosphogluconate dehydrogenase, decarboxylating OS=Danio rerio OX=7955 GN=pgd PE=2 SV=1	53243	2	pgd
sp|Q6P2U9|CSN3_DANRE	0.32443	1.25217	0.243476	sp|Q6P2U9|CSN3_DANRE COP9 signalosome complex subunit 3 OS=Danio rerio OX=7955 GN=cops3 PE=2 SV=1	47907	12	cops3
tr|F1Q889|F1Q889_DANRE	0.32427	1.25203	0.499369	tr|F1Q889|F1Q889_DANRE Negative elongation factor complex member C/D OS=Danio rerio OX=7955 GN=nelfcd PE=1 SV=1	65343	8	nelfcd
tr|Q64HD0|Q64HD0_DANRE	0.324047	1.25184	0.206915	tr|Q64HD0|Q64HD0_DANRE Sex hormone-binding globulin OS=Danio rerio OX=7955 GN=shbg PE=1 SV=1	42071	11	shbg
sp|Q6DBU5|GMPPB_DANRE	0.323823	1.25164	0.124173	sp|Q6DBU5|GMPPB_DANRE Mannose-1-phosphate guanyltransferase beta OS=Danio rerio OX=7955 GN=gmppb PE=2 SV=1	40144	9	gmppb
tr|A0A140LFT4|A0A140LFT4_DANRE	0.323475	1.25134	0.398268	tr|A0A140LFT4|A0A140LFT4_DANRE Shootin-1 (Fragment) OS=Danio rerio OX=7955 GN=shtn3 PE=3 SV=1	71750	10	shtn3
tr|Q1RLR5|Q1RLR5_DANRE	0.32326	1.25115	0.36034	tr|Q1RLR5|Q1RLR5_DANRE B-cell CLL/lymphoma 11A OS=Danio rerio OX=7955 GN=bcl11aa PE=2 SV=1	91726	2	bcl11aa
tr|A0A2R8QTS0|A0A2R8QTS0_DANRE	0.322204	1.25024	0.311802	tr|A0A2R8QTS0|A0A2R8QTS0_DANRE Cytohesin 1b OS=Danio rerio OX=7955 GN=cyth1b PE=4 SV=1	46301	1	cyth1b
tr|E7FGK0|E7FGK0_DANRE	0.32202	1.25008	0.180188	tr|E7FGK0|E7FGK0_DANRE Oxysterol-binding protein OS=Danio rerio OX=7955 GN=osbpl5 PE=3 SV=1	98390	4	osbpl5
tr|A0A2R8QAT3|A0A2R8QAT3_DANRE	0.321894	1.24997	0.581993	tr|A0A2R8QAT3|A0A2R8QAT3_DANRE 7-dehydrocholesterol reductase OS=Danio rerio OX=7955 GN=dhcr7 PE=3 SV=1	60198	3	dhcr7
sp|Q6PC91|BT3L4_DANRE	0.321846	1.24993	0.479536	sp|Q6PC91|BT3L4_DANRE Transcription factor BTF3 homolog 4 OS=Danio rerio OX=7955 GN=btf3l4 PE=2 SV=1	17361	8	btf3l4
tr|A0A0R4IU63|A0A0R4IU63_DANRE	0.32155	1.24967	0.0572834	tr|A0A0R4IU63|A0A0R4IU63_DANRE Glutamate receptor, metabotropic 1b OS=Danio rerio OX=7955 GN=grm1b PE=3 SV=1	130295	11	grm1b
sp|Q6Q415|RL36_DANRE	0.321178	1.24935	0.634259	sp|Q6Q415|RL36_DANRE 60S ribosomal protein L36 OS=Danio rerio OX=7955 GN=rpl36 PE=3 SV=1	12180	4	rpl36
sp|Q568J8|TM256_DANRE	0.321172	1.24935	0.305755	sp|Q568J8|TM256_DANRE Transmembrane protein 256 OS=Danio rerio OX=7955 GN=tmem256 PE=3 SV=1	11954	3	tmem256
tr|A0A2R8QG02|A0A2R8QG02_DANRE	0.320851	1.24907	0.0547028	tr|A0A2R8QG02|A0A2R8QG02_DANRE ATP-dependent helicase ATRX OS=Danio rerio OX=7955 GN=atrx PE=1 SV=1	222386	0	atrx
tr|E7FBE3|E7FBE3_DANRE	0.320495	1.24876	0.135821	tr|E7FBE3|E7FBE3_DANRE Protocadherin 9 OS=Danio rerio OX=7955 GN=pcdh9 PE=4 SV=4	116547	14	pcdh9
tr|A0A2R8Q5U1|A0A2R8Q5U1_DANRE	0.320293	1.24858	0.125676	tr|A0A2R8Q5U1|A0A2R8Q5U1_DANRE Protein quaking-B OS=Danio rerio OX=7955 GN=qkib PE=4 SV=1	38534	5	qkib
tr|Q6IQP4|Q6IQP4_DANRE	0.320291	1.24858	0.287129	tr|Q6IQP4|Q6IQP4_DANRE RAP1A, member of RAS oncogene family OS=Danio rerio OX=7955 GN=rap1aa PE=1 SV=1	21041	1	rap1aa
tr|F1QBH8|F1QBH8_DANRE	0.320263	1.24856	0.107639	tr|F1QBH8|F1QBH8_DANRE Leucine-rich repeat-containing 4Ba OS=Danio rerio OX=7955 GN=lrrc4ba PE=4 SV=1	80205	12	lrrc4ba
tr|F1QT60|F1QT60_DANRE	0.320234	1.24853	0.10459	tr|F1QT60|F1QT60_DANRE Vimentin-like OS=Danio rerio OX=7955 GN=viml PE=1 SV=1	51599	2	viml
tr|B0S5M0|B0S5M0_DANRE	0.319803	1.24816	0.503605	tr|B0S5M0|B0S5M0_DANRE Sorting nexin 4 OS=Danio rerio OX=7955 GN=snx4 PE=1 SV=1	49962	12	snx4
tr|X1WFU1|X1WFU1_DANRE	0.319393	1.24781	0.539515	tr|X1WFU1|X1WFU1_DANRE Leucine zipper protein 1 OS=Danio rerio OX=7955 GN=luzp1 PE=4 SV=1	115825	11	luzp1
tr|A0A2R8QG59|A0A2R8QG59_DANRE	0.319111	1.24756	0.481694	tr|A0A2R8QG59|A0A2R8QG59_DANRE PAN2-PAN3 deadenylation complex subunit PAN3 OS=Danio rerio OX=7955 GN=pan3 PE=1 SV=1	85375	4	pan3
tr|A0A0R4ITL7|A0A0R4ITL7_DANRE	0.318398	1.24695	0.238578	tr|A0A0R4ITL7|A0A0R4ITL7_DANRE Calcium and integrin-binding 1 (calmyrin) OS=Danio rerio OX=7955 GN=cib1 PE=4 SV=1	21396	5	cib1
tr|F1Q9U6|F1Q9U6_DANRE	0.318262	1.24683	0.239288	tr|F1Q9U6|F1Q9U6_DANRE Adenylosuccinate synthetase OS=Danio rerio OX=7955 GN=adssl PE=1 SV=1	51190	1	adssl
sp|Q502D1|GLOD5_DANRE	0.318125	1.24671	0.277035	sp|Q502D1|GLOD5_DANRE Glyoxalase domain-containing protein 5 OS=Danio rerio OX=7955 GN=glod5 PE=2 SV=1	17816	3	glod5
tr|A0A0G2KZ26|A0A0G2KZ26_DANRE	0.317904	1.24652	0.237939	tr|A0A0G2KZ26|A0A0G2KZ26_DANRE Single-strand-selective monofunctional uracil-DNA glycosylase 1 OS=Danio rerio OX=7955 GN=smug1 PE=3 SV=3	30690	3	smug1
tr|Q58EB0|Q58EB0_DANRE	0.317813	1.24644	0.276354	tr|Q58EB0|Q58EB0_DANRE Zgc:110843 OS=Danio rerio OX=7955 GN=zgc:110843 PE=1 SV=1	13306	8	zgc:110843
sp|Q6PBT8|FGF1_DANRE	0.317811	1.24644	0.292012	sp|Q6PBT8|FGF1_DANRE Putative fibroblast growth factor 1 OS=Danio rerio OX=7955 GN=fgf1 PE=2 SV=1	16638	2	fgf1
tr|F1R844|F1R844_DANRE	0.31771	1.24635	0.309738	tr|F1R844|F1R844_DANRE Patatin-like phospholipase domain-containing 6 OS=Danio rerio OX=7955 GN=pnpla6 PE=3 SV=1	150025	16	pnpla6
tr|F1QC72|F1QC72_DANRE	0.317505	1.24617	0.139759	tr|F1QC72|F1QC72_DANRE Alkylglycerone-phosphate synthase OS=Danio rerio OX=7955 GN=agps PE=1 SV=1	70258	16	agps
tr|Q9PW77|Q9PW77_DANRE	0.317456	1.24613	0.583545	tr|Q9PW77|Q9PW77_DANRE Pbx4 homeodomain protein OS=Danio rerio OX=7955 GN=pbx4 PE=1 SV=1	37870	4	pbx4
sp|Q7ZW00|AGK_DANRE	0.317355	1.24604	0.204002	sp|Q7ZW00|AGK_DANRE Acylglycerol kinase, mitochondrial OS=Danio rerio OX=7955 GN=agk PE=2 SV=2	47545	5	agk
tr|A3KMT0|A3KMT0_DANRE	0.316919	1.24567	0.183816	tr|A3KMT0|A3KMT0_DANRE Zgc:158803 OS=Danio rerio OX=7955 GN=zgc:158803 PE=1 SV=1	50085	3	zgc:158803
tr|Q6DH80|Q6DH80_DANRE	0.316844	1.2456	0.209002	tr|Q6DH80|Q6DH80_DANRE Lysozyme g OS=Danio rerio OX=7955 GN=lygl1 PE=1 SV=1	21647	1	lygl1
sp|Q0P4A4|NAT14_DANRE	0.316791	1.24556	0.120184	sp|Q0P4A4|NAT14_DANRE Probable N-acetyltransferase 14 OS=Danio rerio OX=7955 GN=nat14 PE=2 SV=1	31818	6	nat14
tr|F1QUQ0|F1QUQ0_DANRE	0.316438	1.24525	0.241582	tr|F1QUQ0|F1QUQ0_DANRE Isoleucyl-tRNA synthetase OS=Danio rerio OX=7955 GN=iars2 PE=1 SV=1	109911	33	iars2
tr|E7FEF7|E7FEF7_DANRE	0.316383	1.24521	0.0341325	tr|E7FEF7|E7FEF7_DANRE Si:ch73-62l21.1 OS=Danio rerio OX=7955 GN=si:ch73-62l21.1 PE=4 SV=3	34682	8	si:ch73-62l21.1
tr|Q568Q9|Q568Q9_DANRE	0.316327	1.24516	0.38597	tr|Q568Q9|Q568Q9_DANRE Mitochondrial trans-2-enoyl-CoA reductase OS=Danio rerio OX=7955 GN=mecr PE=2 SV=1	41022	2	mecr
sp|Q6TEN6|WDR91_DANRE	0.31603	1.2449	0.431835	sp|Q6TEN6|WDR91_DANRE WD repeat-containing protein 91 OS=Danio rerio OX=7955 GN=wdr91 PE=1 SV=2	80767	10	wdr91
tr|E9QE90|E9QE90_DANRE	0.315916	1.2448	0.248048	tr|E9QE90|E9QE90_DANRE Shisa family member 7a (Fragment) OS=Danio rerio OX=7955 GN=shisa7a PE=4 SV=1	39135	6	shisa7a
tr|A5PKS9|A5PKS9_DANRE	0.315855	1.24475	0.343619	tr|A5PKS9|A5PKS9_DANRE Pacs1 protein OS=Danio rerio OX=7955 GN=pacs1a PE=2 SV=1	100553	11	pacs1a
tr|Q5RKQ3|Q5RKQ3_DANRE	0.315717	1.24463	0.0663058	tr|Q5RKQ3|Q5RKQ3_DANRE Zgc:101598 OS=Danio rerio OX=7955 GN=fubp3 PE=2 SV=1	62094	20	fubp3
tr|Q6IQL7|Q6IQL7_DANRE	0.3155	1.24444	0.146789	tr|Q6IQL7|Q6IQL7_DANRE Peptidylprolyl isomerase D OS=Danio rerio OX=7955 GN=ppid PE=1 SV=1	41282	12	ppid
tr|Q6ZM79|Q6ZM79_DANRE	0.315362	1.24432	0.428156	tr|Q6ZM79|Q6ZM79_DANRE Phosphatase and actin regulator (Fragment) OS=Danio rerio OX=7955 GN=phactr2 PE=3 SV=2	57772	5	phactr2
tr|Q5U386|Q5U386_DANRE	0.315298	1.24427	0.173855	tr|Q5U386|Q5U386_DANRE Protein phosphatase 1A, magnesium dependent, alpha isoform OS=Danio rerio OX=7955 GN=ppm1bb PE=1 SV=1	42198	11	ppm1bb
tr|A0A2R8QU81|A0A2R8QU81_DANRE	0.315216	1.2442	0.503638	tr|A0A2R8QU81|A0A2R8QU81_DANRE NEDD8 OS=Danio rerio OX=7955 GN=nedd8l PE=3 SV=1	11037	3	nedd8l
tr|A0A0R4IB43|A0A0R4IB43_DANRE	0.315205	1.24419	0.142698	tr|A0A0R4IB43|A0A0R4IB43_DANRE Phospholipid-transporting ATPase OS=Danio rerio OX=7955 GN=atp11c PE=3 SV=2	127205	4	atp11c
tr|X1WC51|X1WC51_DANRE	0.315202	1.24419	0.318434	tr|X1WC51|X1WC51_DANRE Adaptor-related protein complex 2 subunit alpha 1 (Fragment) OS=Danio rerio OX=7955 GN=ap2a1 PE=1 SV=1	28489	1	ap2a1
tr|A1L1Q2|A1L1Q2_DANRE	0.314911	1.24394	0.254738	tr|A1L1Q2|A1L1Q2_DANRE Wiskott-Aldrich syndrome protein family member OS=Danio rerio OX=7955 GN=wasf3b PE=1 SV=1	53436	2	wasf3b
tr|E7FFE9|E7FFE9_DANRE	0.314647	1.24371	0.178415	tr|E7FFE9|E7FFE9_DANRE Potassium voltage-gated channel, shaker-related subfamily, member 1a OS=Danio rerio OX=7955 GN=kcna1a PE=4 SV=1	55821	5	kcna1a
tr|A3KPS8|A3KPS8_DANRE	0.313816	1.24299	0.363017	tr|A3KPS8|A3KPS8_DANRE UDP-glucuronosyltransferase OS=Danio rerio OX=7955 GN=ugt5c3 PE=2 SV=1	60558	3	ugt5c3
tr|Q1LVG8|Q1LVG8_DANRE	0.31352	1.24274	0.137562	tr|Q1LVG8|Q1LVG8_DANRE CACN subunit beta-associated regulatory protein b (Fragment) OS=Danio rerio OX=7955 GN=cbarpb PE=4 SV=2	26973	2	cbarpb
tr|A0A0R4ILW8|A0A0R4ILW8_DANRE	0.313494	1.24271	0.262424	tr|A0A0R4ILW8|A0A0R4ILW8_DANRE Geranylgeranyl diphosphate synthase 1 OS=Danio rerio OX=7955 GN=ggps1 PE=1 SV=1	40626	10	ggps1
tr|F1R0Z6|F1R0Z6_DANRE	0.312569	1.24192	0.445097	tr|F1R0Z6|F1R0Z6_DANRE Regulating synaptic membrane exocytosis 1b OS=Danio rerio OX=7955 GN=rims1b PE=4 SV=3	151969	14	rims1b
tr|A0A0R4IWP3|A0A0R4IWP3_DANRE	0.312517	1.24187	0.280895	tr|A0A0R4IWP3|A0A0R4IWP3_DANRE Proteasome subunit beta OS=Danio rerio OX=7955 GN=psmb2 PE=1 SV=1	18851	10	psmb2
tr|A2CF03|A2CF03_DANRE	0.311937	1.24137	0.49925	tr|A2CF03|A2CF03_DANRE LAS1-like ribosome biogenesis factor OS=Danio rerio OX=7955 GN=las1l PE=1 SV=1	66305	5	las1l
tr|A0A0R4IJF2|A0A0R4IJF2_DANRE	0.311603	1.24109	0.232088	tr|A0A0R4IJF2|A0A0R4IJF2_DANRE Integrin, alpha 1 OS=Danio rerio OX=7955 GN=itga1 PE=1 SV=2	132191	17	itga1
tr|A0A0R4IFS2|A0A0R4IFS2_DANRE	0.311492	1.24099	0.207305	tr|A0A0R4IFS2|A0A0R4IFS2_DANRE AP2-associated kinase 1a OS=Danio rerio OX=7955 GN=aak1a PE=1 SV=2	90339	13	aak1a
tr|A0A286YBN1|A0A286YBN1_DANRE	0.311427	1.24093	0.0642887	tr|A0A286YBN1|A0A286YBN1_DANRE Proline-rich coiled-coil 2C OS=Danio rerio OX=7955 GN=prrc2c PE=1 SV=2	306497	24	prrc2c
tr|Q1L881|Q1L881_DANRE	0.31117	1.24071	0.0635796	tr|Q1L881|Q1L881_DANRE Novel protein OS=Danio rerio OX=7955 GN=scyl2 PE=1 SV=1	102523	2	scyl2
tr|F1QJU0|F1QJU0_DANRE	0.310095	1.23979	0.429664	tr|F1QJU0|F1QJU0_DANRE Wu:fc21g02 OS=Danio rerio OX=7955 GN=wu:fc21g02 PE=1 SV=2	49517	2	wu:fc21g02
tr|I3IS33|I3IS33_DANRE	0.31007	1.23977	0.064498	tr|I3IS33|I3IS33_DANRE Synaptotagmin III OS=Danio rerio OX=7955 GN=syt3 PE=4 SV=1	62081	14	syt3
sp|Q6PH11|PYM1_DANRE	0.309875	1.2396	0.347776	sp|Q6PH11|PYM1_DANRE Partner of Y14 and mago OS=Danio rerio OX=7955 GN=pym1 PE=2 SV=1	22066	4	pym1
tr|Q15KE4|Q15KE4_DANRE	0.309867	1.23959	0.296434	tr|Q15KE4|Q15KE4_DANRE Guanine nucleotide-binding protein subunit gamma OS=Danio rerio OX=7955 GN=gng2 PE=1 SV=1	7836	3	gng2
tr|B0V0U7|B0V0U7_DANRE	0.309569	1.23934	0.362806	tr|B0V0U7|B0V0U7_DANRE ATP-binding cassette, sub-family B (MDR/TAP), member 10 OS=Danio rerio OX=7955 GN=abcb10 PE=1 SV=1	63020	3	abcb10
tr|Q68EG7|Q68EG7_DANRE	0.309422	1.23921	0.618708	tr|Q68EG7|Q68EG7_DANRE MORC family CW-type zinc finger 2 OS=Danio rerio OX=7955 GN=morc2 PE=1 SV=1	116971	10	morc2
tr|Q6TH07|Q6TH07_DANRE	0.309225	1.23904	0.075661	tr|Q6TH07|Q6TH07_DANRE Flotillin OS=Danio rerio OX=7955 GN=flot1b PE=1 SV=1	47209	19	flot1b
tr|A0A2R8QDS9|A0A2R8QDS9_DANRE	0.309132	1.23896	0.174839	tr|A0A2R8QDS9|A0A2R8QDS9_DANRE Sp4 transcription factor OS=Danio rerio OX=7955 GN=sp4 PE=1 SV=1	75382	2	sp4
tr|A8WIP2|A8WIP2_DANRE	0.30906	1.2389	0.255792	tr|A8WIP2|A8WIP2_DANRE Methyl-CpG-binding protein 2 OS=Danio rerio OX=7955 GN=mecp2 PE=4 SV=1	56996	2	mecp2
tr|A0A0R4IUY7|A0A0R4IUY7_DANRE	0.309016	1.23886	0.14921	tr|A0A0R4IUY7|A0A0R4IUY7_DANRE ATP-binding cassette, sub-family G (WHITE), member 2a OS=Danio rerio OX=7955 GN=abcg2a PE=1 SV=2	71380	7	abcg2a
tr|A8E7K4|A8E7K4_DANRE	0.30799	1.23798	0.511267	tr|A8E7K4|A8E7K4_DANRE Choline-phosphate cytidylyltransferase OS=Danio rerio OX=7955 GN=pcyt1aa PE=1 SV=1	42847	6	pcyt1aa
tr|A0A2R8QB75|A0A2R8QB75_DANRE	0.307784	1.23781	0.365149	tr|A0A2R8QB75|A0A2R8QB75_DANRE TATA element modulatory factor 1 OS=Danio rerio OX=7955 GN=tmf1 PE=1 SV=1	126723	3	tmf1
tr|A0A2H4NFZ7|A0A2H4NFZ7_DANRE	0.307675	1.23771	0.546465	tr|A0A2H4NFZ7|A0A2H4NFZ7_DANRE MDGA1 OS=Danio rerio OX=7955 GN=mdga1 PE=2 SV=1	103499	9	mdga1
tr|A0A2R8Q9A3|A0A2R8Q9A3_DANRE	0.307509	1.23757	0.551125	tr|A0A2R8Q9A3|A0A2R8Q9A3_DANRE Si:dkey-153k10.9 OS=Danio rerio OX=7955 GN=elapor2b PE=3 SV=1	108078	10	elapor2b
sp|X1WER2|UBA5_DANRE	0.307495	1.23756	0.149238	sp|X1WER2|UBA5_DANRE Ubiquitin-like modifier-activating enzyme 5 OS=Danio rerio OX=7955 GN=uba5 PE=3 SV=2	44234	9	uba5
tr|F1R3J9|F1R3J9_DANRE	0.30735	1.23743	0.0798712	tr|F1R3J9|F1R3J9_DANRE Protein arginine methyltransferase 1 OS=Danio rerio OX=7955 GN=prmt1 PE=1 SV=1	40116	13	prmt1
tr|A0A0R4IRS8|A0A0R4IRS8_DANRE	0.306777	1.23694	0.244074	tr|A0A0R4IRS8|A0A0R4IRS8_DANRE Translocon-associated protein subunit alpha OS=Danio rerio OX=7955 GN=ssr1 PE=1 SV=1	30315	4	ssr1
tr|A0A0R4IM90|A0A0R4IM90_DANRE	0.306753	1.23692	0.434069	tr|A0A0R4IM90|A0A0R4IM90_DANRE Protocadherin 1 gamma 2 OS=Danio rerio OX=7955 GN=pcdh1g2 PE=4 SV=1	103230	2	pcdh1g2
tr|A0A2R8QFV4|A0A2R8QFV4_DANRE	0.306627	1.23681	0.201533	tr|A0A2R8QFV4|A0A2R8QFV4_DANRE Phytanoyl-CoA 2-hydroxylase interacting protein OS=Danio rerio OX=7955 GN=phyhip PE=3 SV=1	37354	8	phyhip
tr|E7F5A6|E7F5A6_DANRE	0.306557	1.23675	0.484613	tr|E7F5A6|E7F5A6_DANRE Bicaudal D homolog 2 (Drosophila) OS=Danio rerio OX=7955 GN=bicd2 PE=1 SV=2	104577	6	bicd2
tr|Q6JAA4|Q6JAA4_DANRE	0.306326	1.23655	0.366878	tr|Q6JAA4|Q6JAA4_DANRE CCCTC-binding factor OS=Danio rerio OX=7955 GN=ctcf PE=1 SV=1	89954	11	ctcf
tr|A4VAK4|A4VAK4_DANRE	0.305526	1.23587	0.374011	tr|A4VAK4|A4VAK4_DANRE Heat shock 27 kDa protein OS=Danio rerio OX=7955 GN=hspb1 PE=1 SV=1	22409	6	hspb1
tr|A0A0R4IFT8|A0A0R4IFT8_DANRE	0.305491	1.23584	0.0989647	tr|A0A0R4IFT8|A0A0R4IFT8_DANRE Deubiquitinating enzyme 47 OS=Danio rerio OX=7955 GN=usp47 PE=1 SV=2	153625	22	usp47
tr|Q6DHS8|Q6DHS8_DANRE	0.305068	1.23548	0.179041	tr|Q6DHS8|Q6DHS8_DANRE Testin OS=Danio rerio OX=7955 GN=tes PE=2 SV=1	57198	5	tes
tr|A0A140LGM3|A0A140LGM3_DANRE	0.304594	1.23507	0.0417899	tr|A0A140LGM3|A0A140LGM3_DANRE K(+) channel subunit beta-2 OS=Danio rerio OX=7955 GN=kcnab2a PE=1 SV=1	41069	8	kcnab2a
tr|F1QVV1|F1QVV1_DANRE	0.303883	1.23446	0.433052	tr|F1QVV1|F1QVV1_DANRE Solute carrier family 18 member 2 (Fragment) OS=Danio rerio OX=7955 GN=slc18a2 PE=3 SV=2	60908	5	slc18a2
tr|Q6P0Z8|Q6P0Z8_DANRE	0.303673	1.23428	0.293845	tr|Q6P0Z8|Q6P0Z8_DANRE Zgc:77375 OS=Danio rerio OX=7955 GN=zgc:77375 PE=1 SV=1	47775	6	zgc:77375
tr|A0A2R8Q696|A0A2R8Q696_DANRE	0.303492	1.23413	0.053933	tr|A0A2R8Q696|A0A2R8Q696_DANRE EMAP-like 2 OS=Danio rerio OX=7955 GN=eml2 PE=1 SV=1	92038	26	eml2
tr|Q6P971|Q6P971_DANRE	0.303383	1.23403	0.527341	tr|Q6P971|Q6P971_DANRE Pyrroline-5-carboxylate reductase OS=Danio rerio OX=7955 GN=pycr1a PE=1 SV=1	33678	9	pycr1a
tr|A0A0R4IPD5|A0A0R4IPD5_DANRE	0.302982	1.23369	0.608899	tr|A0A0R4IPD5|A0A0R4IPD5_DANRE Cyclin-dependent kinase 11B OS=Danio rerio OX=7955 GN=cdk11b PE=1 SV=1	92974	10	cdk11b
tr|A2BIC9|A2BIC9_DANRE	0.302434	1.23322	0.290023	tr|A2BIC9|A2BIC9_DANRE Zgc:101679 OS=Danio rerio OX=7955 GN=zgc:101679 PE=1 SV=2	35662	6	zgc:101679
sp|Q6IQ73|CHM4C_DANRE	0.302153	1.23298	0.208709	sp|Q6IQ73|CHM4C_DANRE Charged multivesicular body protein 4c OS=Danio rerio OX=7955 GN=chmp4c PE=2 SV=1	25176	4	chmp4c
tr|Q6TGR5|Q6TGR5_DANRE	0.302115	1.23295	0.131827	tr|Q6TGR5|Q6TGR5_DANRE Phosphatidylinositol 3,4,5-trisphosphate 3-phosphatase and dual-specificity protein phosphatase PTEN OS=Danio rerio OX=7955 GN=ptenb PE=2 SV=1	49606	6	ptenb
tr|A0A2R8QH26|A0A2R8QH26_DANRE	0.301929	1.23279	0.420583	tr|A0A2R8QH26|A0A2R8QH26_DANRE Non-specific serine/threonine protein kinase OS=Danio rerio OX=7955 GN=wnk1b PE=4 SV=1	205312	6	wnk1b
tr|A0A140LGN9|A0A140LGN9_DANRE	0.301803	1.23268	0.217158	tr|A0A140LGN9|A0A140LGN9_DANRE Eukaryotic translation initiation factor 4 gamma, 3a OS=Danio rerio OX=7955 GN=eif4g3a PE=1 SV=1	189379	17	eif4g3a
tr|B9VEN2|B9VEN2_DANRE	0.301079	1.23207	0.441919	tr|B9VEN2|B9VEN2_DANRE Rapunzel3 OS=Danio rerio OX=7955 GN=rpz6 PE=4 SV=1	45219	6	rpz6
sp|Q6GQN8|MECR_DANRE	0.300562	1.23162	0.341184	sp|Q6GQN8|MECR_DANRE Enoyl-[acyl-carrier-protein] reductase, mitochondrial OS=Danio rerio OX=7955 GN=mecr PE=2 SV=2	41079	1	mecr
tr|X1WE86|X1WE86_DANRE	0.300463	1.23154	0.452151	tr|X1WE86|X1WE86_DANRE FLII actin-remodeling protein OS=Danio rerio OX=7955 GN=flii PE=1 SV=1	143753	19	flii
tr|Q1JPT8|Q1JPT8_DANRE	0.299691	1.23088	0.267476	tr|Q1JPT8|Q1JPT8_DANRE Citrate lyase beta-like OS=Danio rerio OX=7955 GN=clybl PE=1 SV=1	37933	11	clybl
tr|F1RDK4|F1RDK4_DANRE	0.29964	1.23084	0.417294	tr|F1RDK4|F1RDK4_DANRE Rho GTPase-activating protein 32a OS=Danio rerio OX=7955 GN=arhgap32a PE=3 SV=1	186082	5	arhgap32a
tr|A0A0R4IK67|A0A0R4IK67_DANRE	0.299602	1.23081	0.315852	tr|A0A0R4IK67|A0A0R4IK67_DANRE PHD finger protein 14 OS=Danio rerio OX=7955 GN=phf14 PE=1 SV=1	95331	5	phf14
tr|A2THY5|A2THY5_DANRE	0.298894	1.2302	0.445666	tr|A2THY5|A2THY5_DANRE Metaxin OS=Danio rerio OX=7955 GN=mtx1a PE=1 SV=1	35804	7	mtx1a
tr|Q9I9E5|Q9I9E5_DANRE	0.298812	1.23013	0.117961	tr|Q9I9E5|Q9I9E5_DANRE Small nuclear ribonucleoprotein-associated protein OS=Danio rerio OX=7955 GN=snrpb PE=1 SV=1	24463	6	snrpb
tr|Q2TTK0|Q2TTK0_DANRE	0.298538	1.2299	0.584126	tr|Q2TTK0|Q2TTK0_DANRE Cation-independent mannose 6-phosphate receptor OS=Danio rerio OX=7955 GN=igf2r PE=1 SV=1	271329	13	igf2r
tr|A3KQW7|A3KQW7_DANRE	0.298131	1.22955	0.25731	tr|A3KQW7|A3KQW7_DANRE N-glycanase 1 OS=Danio rerio OX=7955 GN=ngly1 PE=1 SV=1	72443	11	ngly1
tr|X1WBU0|X1WBU0_DANRE	0.298045	1.22948	0.529445	tr|X1WBU0|X1WBU0_DANRE Maleylacetoacetate isomerase OS=Danio rerio OX=7955 GN=gstz1 PE=1 SV=2	24544	10	gstz1
tr|A0A286YBA4|A0A286YBA4_DANRE	0.29769	1.22917	0.164603	tr|A0A286YBA4|A0A286YBA4_DANRE Elongin-C OS=Danio rerio OX=7955 GN=elocb PE=1 SV=2	12485	2	elocb
tr|A0A0R4ITV0|A0A0R4ITV0_DANRE	0.297678	1.22916	0.263181	tr|A0A0R4ITV0|A0A0R4ITV0_DANRE Si:dkey-46i9.1 OS=Danio rerio OX=7955 GN=si:dkey-46i9.1 PE=4 SV=1	7278	1	si:dkey-46i9.1
tr|I3ITN3|I3ITN3_DANRE	0.297222	1.22878	0.160583	tr|I3ITN3|I3ITN3_DANRE F-box and leucine-rich repeat protein 16 OS=Danio rerio OX=7955 GN=fbxl16 PE=4 SV=1	54815	13	fbxl16
tr|A8WGP7|A8WGP7_DANRE	0.297171	1.22873	0.211653	tr|A8WGP7|A8WGP7_DANRE UDP-glucose 6-dehydrogenase OS=Danio rerio OX=7955 GN=ugdh PE=1 SV=1	54578	8	ugdh
tr|F1R9Y8|F1R9Y8_DANRE	0.297062	1.22864	0.213133	tr|F1R9Y8|F1R9Y8_DANRE High density lipoprotein-binding protein a OS=Danio rerio OX=7955 GN=hdlbpa PE=1 SV=1	141392	31	hdlbpa
tr|A0A0R4IYH3|A0A0R4IYH3_DANRE	0.296937	1.22853	0.279039	tr|A0A0R4IYH3|A0A0R4IYH3_DANRE DnaJ heat shock protein family (Hsp40) member B1a OS=Danio rerio OX=7955 GN=dnajb1a PE=4 SV=1	36830	4	dnajb1a
tr|A0A0R4ILU5|A0A0R4ILU5_DANRE	0.296687	1.22832	0.255089	tr|A0A0R4ILU5|A0A0R4ILU5_DANRE MAP7 domain-containing 1b (Fragment) OS=Danio rerio OX=7955 GN=map7d1b PE=4 SV=1	39728	3	map7d1b
tr|E7F7K9|E7F7K9_DANRE	0.296548	1.2282	0.430179	tr|E7F7K9|E7F7K9_DANRE Si:ch211-151p13.8 OS=Danio rerio OX=7955 GN=si:ch211-151p13.8 PE=3 SV=1	18405	4	si:ch211-151p13.8
tr|A0A2R8Q244|A0A2R8Q244_DANRE	0.29631	1.228	0.425611	tr|A0A2R8Q244|A0A2R8Q244_DANRE Diacylglycerol lipase, alpha OS=Danio rerio OX=7955 GN=dagla PE=4 SV=1	118791	9	dagla
sp|Q7ZUZ0|CSN8_DANRE	0.295999	1.22773	0.398532	sp|Q7ZUZ0|CSN8_DANRE COP9 signalosome complex subunit 8 OS=Danio rerio OX=7955 GN=cops8 PE=2 SV=1	21546	3	cops8
sp|F1Q8W0|CATIN_DANRE	0.295019	1.2269	0.236932	sp|F1Q8W0|CATIN_DANRE Cactin OS=Danio rerio OX=7955 GN=cactin PE=2 SV=1	97996	2	cactin
tr|Q08CG5|Q08CG5_DANRE	0.294929	1.22682	0.141205	tr|Q08CG5|Q08CG5_DANRE Geranylgeranyl transferase type-2 subunit alpha OS=Danio rerio OX=7955 GN=rabggta PE=2 SV=1	66959	3	rabggta
tr|A4QP04|A4QP04_DANRE	0.294098	1.22612	0.135605	tr|A4QP04|A4QP04_DANRE Sulfurtransferase OS=Danio rerio OX=7955 GN=mpst PE=2 SV=1	32918	9	mpst
tr|A0A0R4IEU0|A0A0R4IEU0_DANRE	0.294019	1.22605	0.422494	tr|A0A0R4IEU0|A0A0R4IEU0_DANRE Erbb2-interacting protein OS=Danio rerio OX=7955 GN=erbin PE=1 SV=1	148623	5	erbin
tr|F1R369|F1R369_DANRE	0.293814	1.22588	0.397267	tr|F1R369|F1R369_DANRE Reticulocalbin 1, EF-hand calcium-binding domain OS=Danio rerio OX=7955 GN=rcn1 PE=1 SV=2	37800	3	rcn1
tr|A0A2R8Q531|A0A2R8Q531_DANRE	0.293415	1.22554	0.322799	tr|A0A2R8Q531|A0A2R8Q531_DANRE Solute carrier family 38 member 3a OS=Danio rerio OX=7955 GN=slc38a3a PE=1 SV=1	56938	12	slc38a3a
tr|F1R020|F1R020_DANRE	0.293313	1.22545	0.187016	tr|F1R020|F1R020_DANRE Si:ch211-114l13.1 OS=Danio rerio OX=7955 GN=si:ch211-114l13.1 PE=4 SV=2	111626	2	si:ch211-114l13.1
tr|Q7SZZ5|Q7SZZ5_DANRE	0.292812	1.22503	0.102704	tr|Q7SZZ5|Q7SZZ5_DANRE Synaptobrevin-2 OS=Danio rerio OX=7955 GN=vamp2 PE=1 SV=1	12128	4	vamp2
tr|F6NM51|F6NM51_DANRE	0.291826	1.22419	0.233995	tr|F6NM51|F6NM51_DANRE Ubiquitin-associated protein 2-like OS=Danio rerio OX=7955 GN=ubap2l PE=1 SV=1	124021	15	ubap2l
sp|Q4V9P6|ADAL_DANRE	0.291645	1.22404	0.0504542	sp|Q4V9P6|ADAL_DANRE Adenosine deaminase-like protein OS=Danio rerio OX=7955 GN=adal PE=2 SV=1	39190	2	adal
tr|Q5RGD1|Q5RGD1_DANRE	0.291446	1.22387	0.193363	tr|Q5RGD1|Q5RGD1_DANRE Syntaxin-binding protein 5a (tomosyn) OS=Danio rerio OX=7955 GN=stxbp5a PE=3 SV=3	124540	18	stxbp5a
tr|Q4V9Q9|Q4V9Q9_DANRE	0.290837	1.22335	0.462901	tr|Q4V9Q9|Q4V9Q9_DANRE Rab proteins geranylgeranyltransferase component A OS=Danio rerio OX=7955 GN=chm PE=2 SV=1	74100	10	chm
tr|A9JR88|A9JR88_DANRE	0.290663	1.2232	0.0464133	tr|A9JR88|A9JR88_DANRE Non-specific serine/threonine protein kinase OS=Danio rerio OX=7955 GN=mark1 PE=2 SV=1	85664	13	mark1
tr|A0A2R8Q906|A0A2R8Q906_DANRE	0.29065	1.22319	0.268107	tr|A0A2R8Q906|A0A2R8Q906_DANRE Leucine carboxyl methyltransferase 1 OS=Danio rerio OX=7955 GN=lcmt1 PE=1 SV=1	37513	9	lcmt1
sp|Q6TH15|EIF3D_DANRE	0.29039	1.22297	0.248551	sp|Q6TH15|EIF3D_DANRE Eukaryotic translation initiation factor 3 subunit D OS=Danio rerio OX=7955 GN=eif3d PE=2 SV=1	64090	21	eif3d
tr|Q6DGV5|Q6DGV5_DANRE	0.290082	1.22271	0.204499	tr|Q6DGV5|Q6DGV5_DANRE RAB10, member RAS oncogene family OS=Danio rerio OX=7955 GN=rab10 PE=1 SV=1	22642	9	rab10
tr|F1QZT2|F1QZT2_DANRE	0.29008	1.22271	0.129609	tr|F1QZT2|F1QZT2_DANRE Protein tweety homolog OS=Danio rerio OX=7955 GN=ttyh1 PE=3 SV=2	64413	6	ttyh1
tr|A0A2R8Q5A6|A0A2R8Q5A6_DANRE	0.289888	1.22255	0.438749	tr|A0A2R8Q5A6|A0A2R8Q5A6_DANRE Wu:fb95e10 OS=Danio rerio OX=7955 GN=wu:fb95e10 PE=1 SV=1	188865	19	wu:fb95e10
tr|E7FE01|E7FE01_DANRE	0.289714	1.2224	0.232621	tr|E7FE01|E7FE01_DANRE DIS3 exosome endoribonuclease and 3'-5' exoribonuclease OS=Danio rerio OX=7955 GN=dis3 PE=1 SV=1	107873	12	dis3
tr|F8W428|F8W428_DANRE	0.289667	1.22236	0.0785474	tr|F8W428|F8W428_DANRE Cullin 4B OS=Danio rerio OX=7955 GN=cul4b PE=1 SV=1	99426	21	cul4b
tr|X1WEL2|X1WEL2_DANRE	0.28954	1.22225	0.13482	tr|X1WEL2|X1WEL2_DANRE G protein-coupled receptor, class C, group 5, member Ba OS=Danio rerio OX=7955 GN=gprc5ba PE=4 SV=1	42585	2	gprc5ba
tr|Q7T2J4|Q7T2J4_DANRE	0.288684	1.22153	0.401896	tr|Q7T2J4|Q7T2J4_DANRE Alcohol dehydrogenase 8b OS=Danio rerio OX=7955 GN=adh8b PE=1 SV=1	40825	6	adh8b
tr|A0A2R8QG50|A0A2R8QG50_DANRE	0.288617	1.22147	0.441193	tr|A0A2R8QG50|A0A2R8QG50_DANRE Solute carrier family 25 member 14 OS=Danio rerio OX=7955 GN=slc25a14 PE=1 SV=1	33975	7	slc25a14
tr|A0A2R8QK33|A0A2R8QK33_DANRE	0.288591	1.22145	0.23154	tr|A0A2R8QK33|A0A2R8QK33_DANRE G-protein-coupled receptor-associated protein LMBRD2B OS=Danio rerio OX=7955 GN=lmbrd2b PE=4 SV=1	82120	6	lmbrd2b
tr|B8JLJ1|B8JLJ1_DANRE	0.288495	1.22137	0.0848026	tr|B8JLJ1|B8JLJ1_DANRE Tyrosine-protein kinase receptor OS=Danio rerio OX=7955 GN=ntrk2a PE=3 SV=2	88280	9	ntrk2a
tr|F1Q4Y5|F1Q4Y5_DANRE	0.288486	1.22136	0.268941	tr|F1Q4Y5|F1Q4Y5_DANRE SLIT-ROBO Rho GTPase-activating protein 1a OS=Danio rerio OX=7955 GN=srgap1a PE=1 SV=1	123020	8	srgap1a
tr|F1QPF7|F1QPF7_DANRE	0.288375	1.22126	0.260092	tr|F1QPF7|F1QPF7_DANRE Cystathionine gamma-lyase OS=Danio rerio OX=7955 GN=cth PE=1 SV=2	44283	2	cth
sp|Q6PHH3|PD10A_DANRE	0.28833	1.22123	0.0329623	sp|Q6PHH3|PD10A_DANRE Programmed cell death protein 10-A OS=Danio rerio OX=7955 GN=pdcd10a PE=1 SV=2	24380	2	pdcd10a
sp|Q58EG2|ERLN1_DANRE	0.288314	1.22121	0.466479	sp|Q58EG2|ERLN1_DANRE Erlin-1 OS=Danio rerio OX=7955 GN=erlin1 PE=2 SV=1	38319	5	erlin1
tr|F1RAM4|F1RAM4_DANRE	0.288159	1.22108	0.240854	tr|F1RAM4|F1RAM4_DANRE Zgc:110339 OS=Danio rerio OX=7955 GN=zgc:110339 PE=1 SV=1	26827	1	zgc:110339
tr|Q7SXM2|Q7SXM2_DANRE	0.288141	1.22107	0.11605	tr|Q7SXM2|Q7SXM2_DANRE Phospholipase A2-activating protein OS=Danio rerio OX=7955 GN=plaa PE=2 SV=1	86236	1	plaa
sp|Q6PBT9|Z385B_DANRE	0.28797	1.22092	0.407196	sp|Q6PBT9|Z385B_DANRE Zinc finger protein 385B OS=Danio rerio OX=7955 GN=znf385b PE=2 SV=1	52604	2	znf385b
sp|B3DJT0|SART3_DANRE	0.287758	1.22074	0.214145	sp|B3DJT0|SART3_DANRE Squamous cell carcinoma antigen recognized by T-cells 3 OS=Danio rerio OX=7955 GN=sart3 PE=2 SV=1	109735	26	sart3
tr|F1R358|F1R358_DANRE	0.287728	1.22072	0.456755	tr|F1R358|F1R358_DANRE Tripartite motif-containing 107 OS=Danio rerio OX=7955 GN=trim107 PE=1 SV=2	52480	9	trim107
tr|F1Q555|F1Q555_DANRE	0.287725	1.22071	0.253828	tr|F1Q555|F1Q555_DANRE Glycerol-3-phosphate dehydrogenase, mitochondrial OS=Danio rerio OX=7955 GN=gpd2 PE=1 SV=1	80595	18	gpd2
tr|J4C3V8|J4C3V8_DANRE	0.287613	1.22062	0.0885606	tr|J4C3V8|J4C3V8_DANRE RNA-binding protein Musashi homolog 1 Long OS=Danio rerio OX=7955 GN=msi1b PE=2 SV=1	38015	5	msi1b
tr|Q6NSM6|Q6NSM6_DANRE	0.287453	1.22048	0.161173	tr|Q6NSM6|Q6NSM6_DANRE Zgc:85963 OS=Danio rerio OX=7955 GN=epb41l3b PE=2 SV=1	94225	10	epb41l3b
tr|A0A2R8QAX6|A0A2R8QAX6_DANRE	0.287315	1.22037	0.336005	tr|A0A2R8QAX6|A0A2R8QAX6_DANRE Nup54 domain-containing protein OS=Danio rerio OX=7955 PE=4 SV=1	14735	4	Uncharacterized protein
tr|F1Q588|F1Q588_DANRE	0.287249	1.22031	0.291564	tr|F1Q588|F1Q588_DANRE DAB2-interacting protein a OS=Danio rerio OX=7955 GN=dab2ipa PE=1 SV=2	127069	11	dab2ipa
tr|A0A0R4ISC3|A0A0R4ISC3_DANRE	0.286844	1.21997	0.182473	tr|A0A0R4ISC3|A0A0R4ISC3_DANRE Microtubule-associated protein 1Sa OS=Danio rerio OX=7955 GN=map1sa PE=1 SV=1	144883	18	map1sa
tr|B8JIV0|B8JIV0_DANRE	0.286392	1.21959	0.366973	tr|B8JIV0|B8JIV0_DANRE Small monomeric GTPase OS=Danio rerio OX=7955 GN=rap2ab PE=3 SV=1	20691	1	rap2ab
tr|F1QF18|F1QF18_DANRE	0.286246	1.21946	0.471276	tr|F1QF18|F1QF18_DANRE DDB1 and CUL4-associated factor 8 OS=Danio rerio OX=7955 GN=dcaf8 PE=1 SV=2	66802	5	dcaf8
tr|A0A2R8QB86|A0A2R8QB86_DANRE	0.28623	1.21945	0.366117	tr|A0A2R8QB86|A0A2R8QB86_DANRE Syntaphilin b OS=Danio rerio OX=7955 GN=snphb PE=4 SV=1	68152	4	snphb
tr|Q6DGK4|Q6DGK4_DANRE	0.286146	1.21938	0.310775	tr|Q6DGK4|Q6DGK4_DANRE Zgc:92880 OS=Danio rerio OX=7955 GN=hbba2 PE=2 SV=1	16279	7	hbba2
tr|E7F6S5|E7F6S5_DANRE	0.285489	1.21882	0.421746	tr|E7F6S5|E7F6S5_DANRE Trafficking regulator of GLUT4 (SLC2A4) 1a OS=Danio rerio OX=7955 GN=trarg1a PE=3 SV=1	18523	5	trarg1a
tr|A0A2R8Q5V2|A0A2R8Q5V2_DANRE	0.285397	1.21875	0.390068	tr|A0A2R8Q5V2|A0A2R8Q5V2_DANRE Zgc:163098 OS=Danio rerio OX=7955 GN=zgc:163098 PE=1 SV=1	100240	3	zgc:163098
tr|A5PMQ1|A5PMQ1_DANRE	0.285194	1.21857	0.206729	tr|A5PMQ1|A5PMQ1_DANRE Leukotriene A(4) hydrolase OS=Danio rerio OX=7955 GN=lta4h PE=1 SV=1	69216	18	lta4h
tr|X1WDS4|X1WDS4_DANRE	0.285024	1.21843	0.0295494	tr|X1WDS4|X1WDS4_DANRE Serine/threonine-protein phosphatase 2A 55 kDa regulatory subunit B OS=Danio rerio OX=7955 GN=ppp2r2aa PE=1 SV=1	51645	13	ppp2r2aa
tr|A0A0R4IBL4|A0A0R4IBL4_DANRE	0.284956	1.21837	0.586506	tr|A0A0R4IBL4|A0A0R4IBL4_DANRE DCN1-like protein OS=Danio rerio OX=7955 GN=dcun1d1 PE=4 SV=1	32746	3	dcun1d1
sp|Q6DG32|S2536_DANRE	0.284115	1.21766	0.21914	sp|Q6DG32|S2536_DANRE Solute carrier family 25 member 36-A OS=Danio rerio OX=7955 GN=slc25a36a PE=2 SV=1	34505	7	slc25a36a
tr|B0BLY0|B0BLY0_DANRE	0.283936	1.21751	0.635126	tr|B0BLY0|B0BLY0_DANRE Exocyst complex component 5 OS=Danio rerio OX=7955 GN=exoc5 PE=1 SV=1	81776	20	exoc5
tr|Q4V8X2|Q4V8X2_DANRE	0.283851	1.21744	0.148895	tr|Q4V8X2|Q4V8X2_DANRE Phosphatidylinositol-3-phosphate phosphatase OS=Danio rerio OX=7955 GN=mtmr7b PE=2 SV=1	64926	14	mtmr7b
tr|A0A0R4ID65|A0A0R4ID65_DANRE	0.283764	1.21737	0.190535	tr|A0A0R4ID65|A0A0R4ID65_DANRE Serine and arginine-rich-splicing factor 7a OS=Danio rerio OX=7955 GN=srsf7a PE=1 SV=1	29815	3	srsf7a
tr|F1QHB1|F1QHB1_DANRE	0.283451	1.2171	0.112367	tr|F1QHB1|F1QHB1_DANRE Fibronectin type III and SPRY domain-containing 1-like OS=Danio rerio OX=7955 GN=fsd1l PE=1 SV=3	54177	7	fsd1l
tr|F8W2A8|F8W2A8_DANRE	0.283003	1.21673	0.103253	tr|F8W2A8|F8W2A8_DANRE Phosphorylase b kinase regulatory subunit (Fragment) OS=Danio rerio OX=7955 GN=phkb PE=1 SV=1	32783	1	phkb
tr|F1QEL0|F1QEL0_DANRE	0.282759	1.21652	0.50624	tr|F1QEL0|F1QEL0_DANRE Transmembrane protein 214 OS=Danio rerio OX=7955 GN=tmem214 PE=1 SV=2	76097	7	tmem214
tr|Q802Z5|Q802Z5_DANRE	0.282376	1.2162	0.154056	tr|Q802Z5|Q802Z5_DANRE Non-POU domain-containing, octamer-binding OS=Danio rerio OX=7955 GN=nono PE=1 SV=1	50458	17	nono
tr|F1QMC3|F1QMC3_DANRE	0.28181	1.21572	0.309805	tr|F1QMC3|F1QMC3_DANRE Septin OS=Danio rerio OX=7955 GN=sept7b PE=1 SV=3	45034	1	sept7b
tr|A0A2R8RQB0|A0A2R8RQB0_DANRE	0.281591	1.21553	0.563284	tr|A0A2R8RQB0|A0A2R8RQB0_DANRE Conserved oligomeric Golgi complex subunit 5 OS=Danio rerio OX=7955 GN=cog5 PE=1 SV=1	89845	7	cog5
tr|F1QHQ1|F1QHQ1_DANRE	0.281561	1.21551	0.305569	tr|F1QHQ1|F1QHQ1_DANRE Solute carrier family 25 member 29 OS=Danio rerio OX=7955 GN=slc25a29 PE=3 SV=1	33327	3	slc25a29
tr|A0A0R4IVY1|A0A0R4IVY1_DANRE	0.281235	1.21523	0.341569	tr|A0A0R4IVY1|A0A0R4IVY1_DANRE Si:ch73-103b11.2 OS=Danio rerio OX=7955 GN=si:ch73-103b11.2 PE=4 SV=2	91860	1	si:ch73-103b11.2
tr|U3N867|U3N867_DANRE	0.281232	1.21523	0.309835	tr|U3N867|U3N867_DANRE Metabotropic glutamate receptor 7 OS=Danio rerio OX=7955 PE=2 SV=1	101452	13	Uncharacterized protein
tr|Q24JU9|Q24JU9_DANRE	0.281182	1.21519	0.337551	tr|Q24JU9|Q24JU9_DANRE Glia maturation factor OS=Danio rerio OX=7955 GN=gmfg PE=2 SV=1	16682	2	gmfg
tr|E7F8P4|E7F8P4_DANRE	0.281096	1.21512	0.417793	tr|E7F8P4|E7F8P4_DANRE Pleckstrin homology domain-containing, family O member 2 OS=Danio rerio OX=7955 GN=plekho2 PE=4 SV=1	74812	5	plekho2
tr|A0A2R8QL66|A0A2R8QL66_DANRE	0.280803	1.21487	0.0933485	tr|A0A2R8QL66|A0A2R8QL66_DANRE COP9 signalosome complex subunit 4 OS=Danio rerio OX=7955 GN=cops4 PE=1 SV=1	46433	1	cops4
tr|Q5RHK5|Q5RHK5_DANRE	0.280745	1.21482	0.408113	tr|Q5RHK5|Q5RHK5_DANRE Myotubularin-related protein 9 OS=Danio rerio OX=7955 GN=mtmr9 PE=1 SV=1	62695	10	mtmr9
tr|A0A2R8Q793|A0A2R8Q793_DANRE	0.280632	1.21473	0.129214	tr|A0A2R8Q793|A0A2R8Q793_DANRE PC4 and SFRS1-interacting protein 1b OS=Danio rerio OX=7955 GN=psip1b PE=1 SV=1	175953	3	psip1b
tr|E7FE49|E7FE49_DANRE	0.280572	1.21468	0.0834725	tr|E7FE49|E7FE49_DANRE DNA topoisomerase I OS=Danio rerio OX=7955 GN=top1 PE=3 SV=4	66194	6	top1
tr|A0A2R8QE30|A0A2R8QE30_DANRE	0.280121	1.2143	0.078702	tr|A0A2R8QE30|A0A2R8QE30_DANRE Solute carrier family 27 member 1a OS=Danio rerio OX=7955 GN=slc27a1a PE=1 SV=1	72073	18	slc27a1a
tr|I3IT16|I3IT16_DANRE	0.279912	1.21412	0.478906	tr|I3IT16|I3IT16_DANRE Ubiquitin-specific peptidase 8 OS=Danio rerio OX=7955 GN=usp8 PE=1 SV=1	121104	9	usp8
sp|Q5U378|TBCE_DANRE	0.279823	1.21405	0.441507	sp|Q5U378|TBCE_DANRE Tubulin-specific chaperone E OS=Danio rerio OX=7955 GN=tbce PE=2 SV=2	59043	9	tbce
tr|E7EY38|E7EY38_DANRE	0.279623	1.21388	0.606216	tr|E7EY38|E7EY38_DANRE Vacuolar fusion protein MON1 homolog OS=Danio rerio OX=7955 GN=mon1bb PE=1 SV=1	65889	6	mon1bb
tr|F1QYJ2|F1QYJ2_DANRE	0.279172	1.2135	0.299854	tr|F1QYJ2|F1QYJ2_DANRE Rabenosyn, RAB effector OS=Danio rerio OX=7955 GN=rbsn PE=4 SV=3	82184	15	rbsn
sp|Q66I22|SRRT_DANRE	0.279069	1.21341	0.132216	sp|Q66I22|SRRT_DANRE Serrate RNA effector molecule homolog OS=Danio rerio OX=7955 GN=srrt PE=2 SV=1	103274	19	srrt
tr|A0A2R8Q3I4|A0A2R8Q3I4_DANRE	0.278627	1.21304	0.112473	tr|A0A2R8Q3I4|A0A2R8Q3I4_DANRE Furry homolog b (Drosophila) OS=Danio rerio OX=7955 GN=fryb PE=4 SV=1	335272	28	fryb
tr|Q7ZUQ2|Q7ZUQ2_DANRE	0.278481	1.21292	0.128549	tr|Q7ZUQ2|Q7ZUQ2_DANRE Serine/threonine protein phosphatase 2A regulatory subunit OS=Danio rerio OX=7955 GN=ppp2r5eb PE=1 SV=1	54633	10	ppp2r5eb
tr|Q5BJA1|Q5BJA1_DANRE	0.278437	1.21288	0.067724	tr|Q5BJA1|Q5BJA1_DANRE 40S ribosomal protein S17 OS=Danio rerio OX=7955 GN=zgc:114188 PE=1 SV=1	15453	6	zgc:114188
tr|A5WUR0|A5WUR0_DANRE	0.278285	1.21275	0.354126	tr|A5WUR0|A5WUR0_DANRE Cell division cycle 40 homolog (S. cerevisiae) OS=Danio rerio OX=7955 GN=cdc40 PE=1 SV=1	65327	7	cdc40
sp|Q6PC19|SSU72_DANRE	0.278276	1.21274	0.290025	sp|Q6PC19|SSU72_DANRE RNA polymerase II subunit A C-terminal domain phosphatase SSU72 OS=Danio rerio OX=7955 GN=ssu72 PE=2 SV=1	22793	4	ssu72
tr|Q6DGL5|Q6DGL5_DANRE	0.278128	1.21262	0.476294	tr|Q6DGL5|Q6DGL5_DANRE Trafficking protein particle complex subunit 5 OS=Danio rerio OX=7955 GN=trappc5 PE=1 SV=1	21030	4	trappc5
tr|E7FG72|E7FG72_DANRE	0.277949	1.21247	0.402161	tr|E7FG72|E7FG72_DANRE AFG1-like ATPase a OS=Danio rerio OX=7955 GN=afg1la PE=3 SV=2	33437	5	afg1la
tr|B1NJ27|B1NJ27_DANRE	0.277943	1.21246	0.518315	tr|B1NJ27|B1NJ27_DANRE Phosphofurin acidic cluster sorting protein 2 OS=Danio rerio OX=7955 GN=pacs2 PE=2 SV=1	97649	5	pacs2
tr|F1R473|F1R473_DANRE	0.277342	1.21196	0.238771	tr|F1R473|F1R473_DANRE Actin-like 6A OS=Danio rerio OX=7955 GN=actl6a PE=1 SV=2	47268	13	actl6a
tr|X1WET2|X1WET2_DANRE	0.277197	1.21184	0.27402	tr|X1WET2|X1WET2_DANRE Protein-tyrosine-phosphatase (Fragment) OS=Danio rerio OX=7955 GN=ptprz1a PE=3 SV=1	201997	4	ptprz1a
tr|B8JHR9|B8JHR9_DANRE	0.275965	1.2108	0.0486818	tr|B8JHR9|B8JHR9_DANRE Karyopherin (importin) beta 3 OS=Danio rerio OX=7955 GN=kpnb3 PE=1 SV=2	122739	36	kpnb3
sp|A0A2R8QF68|GRIK2_DANRE	0.275928	1.21077	0.427056	sp|A0A2R8QF68|GRIK2_DANRE Glutamate receptor ionotropic, kainate 2 OS=Danio rerio OX=7955 GN=grik2 PE=3 SV=1	102520	16	grik2
sp|A3KP77|OXND1_DANRE	0.2755	1.21041	0.294243	sp|A3KP77|OXND1_DANRE Oxidoreductase NAD-binding domain-containing protein 1 OS=Danio rerio OX=7955 GN=oxnad1 PE=2 SV=1	30699	4	oxnad1
tr|F1Q7S8|F1Q7S8_DANRE	0.27545	1.21037	0.189504	tr|F1Q7S8|F1Q7S8_DANRE Protein argonaute-3 OS=Danio rerio OX=7955 GN=ago3a PE=3 SV=2	98238	4	ago3a
tr|A1L1V5|A1L1V5_DANRE	0.27512	1.21009	0.218271	tr|A1L1V5|A1L1V5_DANRE Zgc:158416 OS=Danio rerio OX=7955 GN=git2b PE=2 SV=1	81544	7	git2b
tr|Q7ZU43|Q7ZU43_DANRE	0.275034	1.21002	0.52757	tr|Q7ZU43|Q7ZU43_DANRE Carboxypeptidase vitellogenic-like OS=Danio rerio OX=7955 GN=cpvl PE=1 SV=1	54515	7	cpvl
tr|A0A0R4IEX8|A0A0R4IEX8_DANRE	0.274875	1.20989	0.0753119	tr|A0A0R4IEX8|A0A0R4IEX8_DANRE ATP-dependent 6-phosphofructokinase OS=Danio rerio OX=7955 GN=pfkla PE=1 SV=1	84392	23	pfkla
sp|Q0P442|RNKB_DANRE	0.274365	1.20946	0.377371	sp|Q0P442|RNKB_DANRE Ribonuclease kappa-B OS=Danio rerio OX=7955 GN=rnasekb PE=3 SV=1	11046	2	rnasekb
tr|Q4VBW1|Q4VBW1_DANRE	0.273911	1.20908	0.495527	tr|Q4VBW1|Q4VBW1_DANRE Proteasome (Prosome, macropain) 26S subunit, non-ATPase, 10 OS=Danio rerio OX=7955 GN=psmd10 PE=2 SV=1	24391	5	psmd10
tr|A0A0R4IGP7|A0A0R4IGP7_DANRE	0.273855	1.20903	0.544128	tr|A0A0R4IGP7|A0A0R4IGP7_DANRE Cullin 5b OS=Danio rerio OX=7955 GN=cul5b PE=3 SV=2	90832	3	cul5b
tr|A5WWI5|A5WWI5_DANRE	0.273749	1.20895	0.674905	tr|A5WWI5|A5WWI5_DANRE Alpha-2-HS-glycoprotein 2 OS=Danio rerio OX=7955 GN=ahsg2 PE=1 SV=1	42441	3	ahsg2
tr|F1QAM8|F1QAM8_DANRE	0.273352	1.20861	0.0580619	tr|F1QAM8|F1QAM8_DANRE Vimentin OS=Danio rerio OX=7955 GN=vim PE=1 SV=1	52538	27	vim
sp|Q5RHR6|BROMI_DANRE	0.273339	1.2086	0.599627	sp|Q5RHR6|BROMI_DANRE Protein broad-minded OS=Danio rerio OX=7955 GN=tbc1d32 PE=3 SV=2	147547	5	tbc1d32
tr|E9QH31|E9QH31_DANRE	0.27308	1.20839	0.482558	tr|E9QH31|E9QH31_DANRE Aldehyde dehydrogenase OS=Danio rerio OX=7955 GN=aldh3a2b PE=1 SV=2	55060	8	aldh3a2b
tr|E7EZQ7|E7EZQ7_DANRE	0.273018	1.20833	0.229563	tr|E7EZQ7|E7EZQ7_DANRE NAC alpha domain-containing OS=Danio rerio OX=7955 GN=nacad PE=4 SV=1	204413	29	nacad
tr|P87360|P87360_DANRE	0.272905	1.20824	0.188133	tr|P87360|P87360_DANRE Gefiltin OS=Danio rerio OX=7955 GN=inab PE=2 SV=1	54424	3	inab
tr|A0A2R8QP47|A0A2R8QP47_DANRE	0.272722	1.20809	0.307982	tr|A0A2R8QP47|A0A2R8QP47_DANRE Phosphatidylinositol-5-phosphate 4-kinase, type II, gamma a OS=Danio rerio OX=7955 GN=pip4k2ca PE=1 SV=1	47378	10	pip4k2ca
tr|E7F2X0|E7F2X0_DANRE	0.272379	1.2078	0.231067	tr|E7F2X0|E7F2X0_DANRE CAP-GLY domain-containing linker protein 1a OS=Danio rerio OX=7955 GN=clip1a PE=1 SV=2	174918	17	clip1a
sp|F6P3G4|PS11A_DANRE	0.272233	1.20768	0.132685	sp|F6P3G4|PS11A_DANRE 26S proteasome non-ATPase regulatory subunit 11A OS=Danio rerio OX=7955 GN=psmd11a PE=2 SV=1	47374	18	psmd11a
sp|Q6DRG1|RBM42_DANRE	0.271677	1.20721	0.39878	sp|Q6DRG1|RBM42_DANRE RNA-binding protein 42 OS=Danio rerio OX=7955 GN=rbm42 PE=2 SV=2	43690	4	rbm42
tr|A0JMN7|A0JMN7_DANRE	0.271661	1.2072	0.173819	tr|A0JMN7|A0JMN7_DANRE Zgc:154064 protein OS=Danio rerio OX=7955 GN=spats2 PE=2 SV=1	50706	6	spats2
tr|F1QND8|F1QND8_DANRE	0.271495	1.20706	0.211951	tr|F1QND8|F1QND8_DANRE Phosphatidylinositol glycan anchor biosynthesis, class S OS=Danio rerio OX=7955 GN=pigs PE=1 SV=1	62900	3	pigs
tr|E7F861|E7F861_DANRE	0.271238	1.20684	0.0951675	tr|E7F861|E7F861_DANRE Cornichon family AMPA receptor auxiliary protein 4 OS=Danio rerio OX=7955 GN=cnih4 PE=1 SV=1	11961	1	cnih4
tr|A0A0R4IFI0|A0A0R4IFI0_DANRE	0.270993	1.20664	0.152613	tr|A0A0R4IFI0|A0A0R4IFI0_DANRE Regulatory-associated protein of MTOR, complex 1 OS=Danio rerio OX=7955 GN=rptor PE=1 SV=1	152557	15	rptor
tr|Q6NYF2|Q6NYF2_DANRE	0.270146	1.20593	0.155578	tr|Q6NYF2|Q6NYF2_DANRE Chloride intracellular channel protein OS=Danio rerio OX=7955 GN=clic1 PE=2 SV=1	26966	1	clic1
sp|Q7SZC2|XPO2_DANRE	0.27007	1.20587	0.0651697	sp|Q7SZC2|XPO2_DANRE Exportin-2 OS=Danio rerio OX=7955 GN=cse1l PE=1 SV=2	110028	36	cse1l
tr|Q66I54|Q66I54_DANRE	0.2699	1.20572	0.248479	tr|Q66I54|Q66I54_DANRE Mitochondrial ribosomal protein L53 OS=Danio rerio OX=7955 GN=mrpl53 PE=1 SV=1	11994	5	mrpl53
tr|F1R9I6|F1R9I6_DANRE	0.269754	1.2056	0.326503	tr|F1R9I6|F1R9I6_DANRE Microfibril-associated protein 1 OS=Danio rerio OX=7955 GN=mfap1 PE=1 SV=1	51605	5	mfap1
tr|B0S4T7|B0S4T7_DANRE	0.269404	1.20531	0.320288	tr|B0S4T7|B0S4T7_DANRE Protein kinase C OS=Danio rerio OX=7955 GN=prkcz PE=2 SV=1	68776	3	prkcz
tr|E7F3J2|E7F3J2_DANRE	0.269188	1.20513	0.117982	tr|E7F3J2|E7F3J2_DANRE Heterogeneous nuclear ribonucleoprotein Ua OS=Danio rerio OX=7955 GN=hnrnpua PE=1 SV=1	85131	18	hnrnpua
tr|A0A2R8RPF6|A0A2R8RPF6_DANRE	0.268107	1.20423	0.579908	tr|A0A2R8RPF6|A0A2R8RPF6_DANRE Si:dkey-40c11.2 OS=Danio rerio OX=7955 GN=si:dkey-40c11.2 PE=1 SV=1	87263	7	si:dkey-40c11.2
tr|A0A0R4IFN9|A0A0R4IFN9_DANRE	0.268056	1.20418	0.196985	tr|A0A0R4IFN9|A0A0R4IFN9_DANRE Calcium channel, voltage-dependent, P/Q type, alpha 1A subunit, b OS=Danio rerio OX=7955 GN=cacna1ab PE=3 SV=1	265016	7	cacna1ab
tr|F1Q5Z2|F1Q5Z2_DANRE	0.267955	1.2041	0.361294	tr|F1Q5Z2|F1Q5Z2_DANRE AP complex subunit sigma OS=Danio rerio OX=7955 GN=ap1s1 PE=1 SV=1	18644	3	ap1s1
tr|F1RDQ5|F1RDQ5_DANRE	0.267895	1.20405	0.0798693	tr|F1RDQ5|F1RDQ5_DANRE Beta-hexosaminidase OS=Danio rerio OX=7955 GN=hexa PE=1 SV=1	60757	10	hexa
tr|A0A0R4IDA7|A0A0R4IDA7_DANRE	0.267519	1.20374	0.257358	tr|A0A0R4IDA7|A0A0R4IDA7_DANRE Tumor protein D52 OS=Danio rerio OX=7955 GN=tpd52 PE=1 SV=1	23284	9	tpd52
tr|E7F3N0|E7F3N0_DANRE	0.267477	1.2037	0.225929	tr|E7F3N0|E7F3N0_DANRE Si:ch211-160o17.2 OS=Danio rerio OX=7955 GN=si:ch211-160o17.2 PE=3 SV=1	41100	9	si:ch211-160o17.2
tr|F1QKE9|F1QKE9_DANRE	0.267435	1.20367	0.310211	tr|F1QKE9|F1QKE9_DANRE Mitochondrial ribosomal protein L20 OS=Danio rerio OX=7955 GN=mrpl20 PE=1 SV=1	17275	2	mrpl20
tr|A0A2R8Q586|A0A2R8Q586_DANRE	0.266863	1.20319	0.571879	tr|A0A2R8Q586|A0A2R8Q586_DANRE COX assembly mitochondrial protein OS=Danio rerio OX=7955 GN=cmc1 PE=1 SV=1	12729	5	cmc1
tr|F1QJZ8|F1QJZ8_DANRE	0.266757	1.2031	0.545916	tr|F1QJZ8|F1QJZ8_DANRE Sema domain, immunoglobulin domain (Ig), transmembrane domain (TM) and short cytoplasmic domain, (semaphorin) 4Gb (Fragment) OS=Danio rerio OX=7955 GN=sema4gb PE=3 SV=2	85159	3	sema4gb
tr|A3KPG7|A3KPG7_DANRE	0.266637	1.203	0.486715	tr|A3KPG7|A3KPG7_DANRE Pentaxin OS=Danio rerio OX=7955 GN=crp1 PE=1 SV=1	25484	6	crp1
tr|B0S516|B0S516_DANRE	0.266119	1.20257	0.45965	tr|B0S516|B0S516_DANRE Actin-related protein 2/3 complex subunit 5 OS=Danio rerio OX=7955 GN=arpc5lb PE=1 SV=1	16801	3	arpc5lb
tr|A0A0R4IDR7|A0A0R4IDR7_DANRE	0.265818	1.20232	0.0940142	tr|A0A0R4IDR7|A0A0R4IDR7_DANRE Mitogen-activated protein kinase 8-interacting protein 3 OS=Danio rerio OX=7955 GN=mapk8ip3 PE=3 SV=2	144041	24	mapk8ip3
tr|B0R168|B0R168_DANRE	0.265811	1.20231	0.409104	tr|B0R168|B0R168_DANRE RAS (RAD and GEM)-like GTP-binding 2 OS=Danio rerio OX=7955 GN=rem2 PE=2 SV=1	34083	9	rem2
tr|B7ZVV7|B7ZVV7_DANRE	0.265755	1.20227	0.641866	tr|B7ZVV7|B7ZVV7_DANRE Zgc:165600 protein OS=Danio rerio OX=7955 GN=zgc:165600 PE=2 SV=1	30671	5	zgc:165600
sp|Q32LU1|MIRO2_DANRE	0.265328	1.20191	0.185747	sp|Q32LU1|MIRO2_DANRE Mitochondrial Rho GTPase 2 OS=Danio rerio OX=7955 GN=rhot2 PE=2 SV=1	69740	8	rhot2
tr|A2RV28|A2RV28_DANRE	0.264804	1.20147	0.281594	tr|A2RV28|A2RV28_DANRE Pank1b protein OS=Danio rerio OX=7955 GN=pank1b PE=2 SV=1	49924	3	pank1b
tr|Q501V8|Q501V8_DANRE	0.264781	1.20145	0.131605	tr|Q501V8|Q501V8_DANRE Stearoyl-CoA desaturase b OS=Danio rerio OX=7955 GN=scdb PE=2 SV=1	36285	2	scdb
tr|B8A5M8|B8A5M8_DANRE	0.264492	1.20121	0.221998	tr|B8A5M8|B8A5M8_DANRE Kinesin light chain OS=Danio rerio OX=7955 GN=klc1a PE=1 SV=1	67506	10	klc1a
tr|A7YYG2|A7YYG2_DANRE	0.264312	1.20106	0.205464	tr|A7YYG2|A7YYG2_DANRE Peptidylprolyl isomerase OS=Danio rerio OX=7955 GN=fkbp8 PE=2 SV=1	43841	8	fkbp8
tr|A0A0R4IIW2|A0A0R4IIW2_DANRE	0.264265	1.20102	0.265849	tr|A0A0R4IIW2|A0A0R4IIW2_DANRE Si:ch211-114m9.1 OS=Danio rerio OX=7955 GN=arhgap44a PE=4 SV=2	104156	16	arhgap44a
tr|Q1JQ24|Q1JQ24_DANRE	0.263752	1.2006	0.314092	tr|Q1JQ24|Q1JQ24_DANRE Zgc:136346 OS=Danio rerio OX=7955 GN=dek PE=2 SV=1	49949	7	dek
tr|B8A4X7|B8A4X7_DANRE	0.263636	1.2005	0.393964	tr|B8A4X7|B8A4X7_DANRE LIM and calponin homology domains 1a OS=Danio rerio OX=7955 GN=limch1a PE=1 SV=1	114485	17	limch1a
tr|F1R050|F1R050_DANRE	0.263586	1.20046	0.619895	tr|F1R050|F1R050_DANRE Non-specific serine/threonine protein kinase OS=Danio rerio OX=7955 GN=stk11 PE=1 SV=1	49628	8	stk11
tr|F1QCE3|F1QCE3_DANRE	0.263255	1.20018	0.292641	tr|F1QCE3|F1QCE3_DANRE Peroxiredoxin-5 OS=Danio rerio OX=7955 GN=prdx5 PE=1 SV=1	20201	9	prdx5
tr|A0A0R4IY27|A0A0R4IY27_DANRE	0.263118	1.20007	0.4057	tr|A0A0R4IY27|A0A0R4IY27_DANRE Neurobeachin b (Fragment) OS=Danio rerio OX=7955 GN=nbeab PE=4 SV=1	311666	3	nbeab
tr|A0A286Y7Z8|A0A286Y7Z8_DANRE	0.263018	1.19999	0.485577	tr|A0A286Y7Z8|A0A286Y7Z8_DANRE Cyclin Y OS=Danio rerio OX=7955 GN=ccny PE=3 SV=2	39466	7	ccny
tr|F1R0U5|F1R0U5_DANRE	0.262567	1.19961	0.621118	tr|F1R0U5|F1R0U5_DANRE La ribonucleoprotein 1, translational regulator OS=Danio rerio OX=7955 GN=larp1 PE=1 SV=2	110557	7	larp1
tr|Q1L8N2|Q1L8N2_DANRE	0.262549	1.1996	0.56756	tr|Q1L8N2|Q1L8N2_DANRE UV excision repair protein RAD23 OS=Danio rerio OX=7955 GN=rad23ab PE=1 SV=1	43895	7	rad23ab
tr|A0A2R8QLY1|A0A2R8QLY1_DANRE	0.262392	1.19947	0.197786	tr|A0A2R8QLY1|A0A2R8QLY1_DANRE Sodium channel protein OS=Danio rerio OX=7955 GN=scn8aa PE=3 SV=1	221776	16	scn8aa
tr|A0A2R8RZE7|A0A2R8RZE7_DANRE	0.262196	1.1993	0.531984	tr|A0A2R8RZE7|A0A2R8RZE7_DANRE RAS protein activator-like 1b (GAP1 like) OS=Danio rerio OX=7955 GN=rasal1b PE=4 SV=1	29280	3	rasal1b
tr|Q1RLV3|Q1RLV3_DANRE	0.262101	1.19922	0.572678	tr|Q1RLV3|Q1RLV3_DANRE Protein transport protein sec16 (Fragment) OS=Danio rerio OX=7955 GN=sec16a PE=2 SV=1	121387	3	sec16a
tr|Q6NW90|Q6NW90_DANRE	0.26185	1.19902	0.216401	tr|Q6NW90|Q6NW90_DANRE Tubulin beta chain OS=Danio rerio OX=7955 GN=tubb5 PE=1 SV=1	49673	4	tubb5
tr|A7MBY4|A7MBY4_DANRE	0.261761	1.19894	0.591987	tr|A7MBY4|A7MBY4_DANRE Histone H2B OS=Danio rerio OX=7955 GN=zgc:171759 PE=1 SV=1	7395	3	zgc:171759
tr|B3DKI8|B3DKI8_DANRE	0.261245	1.19851	0.0515648	tr|B3DKI8|B3DKI8_DANRE Sec1 family domain-containing 1 OS=Danio rerio OX=7955 GN=scfd1 PE=1 SV=1	71571	18	scfd1
sp|E7FC72|EXOC7_DANRE	0.261097	1.19839	0.231163	sp|E7FC72|EXOC7_DANRE Exocyst complex component 7 OS=Danio rerio OX=7955 GN=exoc7 PE=3 SV=2	82197	1	exoc7
tr|Q6PGX4|Q6PGX4_DANRE	0.260175	1.19762	0.623276	tr|Q6PGX4|Q6PGX4_DANRE Heat shock cognate 70 OS=Danio rerio OX=7955 GN=hsc70 PE=1 SV=1	70946	4	hsc70
tr|F1QY34|F1QY34_DANRE	0.260136	1.19759	0.174329	tr|F1QY34|F1QY34_DANRE Low density lipoprotein receptor-related protein 1Ab OS=Danio rerio OX=7955 GN=lrp1ab PE=1 SV=1	508787	51	lrp1ab
sp|Q5PQY6|LONP2_DANRE	0.259023	1.19667	0.359593	sp|Q5PQY6|LONP2_DANRE Lon protease homolog 2, peroxisomal OS=Danio rerio OX=7955 GN=lonp2 PE=2 SV=1	92221	5	lonp2
tr|F1QQU8|F1QQU8_DANRE	0.258813	1.19649	0.46563	tr|F1QQU8|F1QQU8_DANRE Protein BCCIP homolog OS=Danio rerio OX=7955 GN=bccip PE=1 SV=1	34000	8	bccip
tr|F8W4C4|F8W4C4_DANRE	0.258757	1.19645	0.163751	tr|F8W4C4|F8W4C4_DANRE Ubiquitin carboxyl-terminal hydrolase OS=Danio rerio OX=7955 GN=usp5 PE=1 SV=1	92783	37	usp5
tr|F1QGE6|F1QGE6_DANRE	0.25835	1.19611	0.0693926	tr|F1QGE6|F1QGE6_DANRE Tumor susceptibility 101a OS=Danio rerio OX=7955 GN=tsg101a PE=1 SV=2	44109	12	tsg101a
tr|Q561Y1|Q561Y1_DANRE	0.25833	1.19609	0.15044	tr|Q561Y1|Q561Y1_DANRE 26S proteasome non-ATPase regulatory subunit 4 OS=Danio rerio OX=7955 GN=psmd4b PE=1 SV=1	40200	9	psmd4b
tr|A7MCG7|A7MCG7_DANRE	0.258166	1.19596	0.482333	tr|A7MCG7|A7MCG7_DANRE Acyl carrier protein OS=Danio rerio OX=7955 GN=ndufab1a PE=2 SV=1	17659	2	ndufab1a
tr|K7DY59|K7DY59_DANRE	0.258159	1.19595	0.22466	tr|K7DY59|K7DY59_DANRE Si:dkey-81e3.1 OS=Danio rerio OX=7955 GN=dock4 PE=3 SV=1	221395	25	dock4
tr|A0A2R8Q8V9|A0A2R8Q8V9_DANRE	0.257503	1.19541	0.264368	tr|A0A2R8Q8V9|A0A2R8Q8V9_DANRE Echinoderm microtubule associated protein like 4 OS=Danio rerio OX=7955 GN=eml4 PE=1 SV=1	105156	15	eml4
tr|F1RAH7|F1RAH7_DANRE	0.257464	1.19538	0.687568	tr|F1RAH7|F1RAH7_DANRE Alanine--tRNA ligase (Fragment) OS=Danio rerio OX=7955 GN=aars2 PE=1 SV=1	110725	9	aars2
tr|F1Q511|F1Q511_DANRE	0.257382	1.19531	0.292081	tr|F1Q511|F1Q511_DANRE Apoptotic chromatin condensation inducer 1b OS=Danio rerio OX=7955 GN=acin1b PE=1 SV=1	139429	13	acin1b
tr|Q7ZVI8|Q7ZVI8_DANRE	0.256713	1.19475	0.241858	tr|Q7ZVI8|Q7ZVI8_DANRE NPL4 homolog, ubiquitin recognition factor OS=Danio rerio OX=7955 GN=nploc4 PE=1 SV=1	69627	16	nploc4
sp|A1A5Z3|EFTS_DANRE	0.256644	1.1947	0.109578	sp|A1A5Z3|EFTS_DANRE Elongation factor Ts, mitochondrial OS=Danio rerio OX=7955 GN=tsfm PE=2 SV=1	33474	11	tsfm
tr|A0A2R8QL20|A0A2R8QL20_DANRE	0.255242	1.19354	0.216563	tr|A0A2R8QL20|A0A2R8QL20_DANRE Protein phosphatase 1, regulatory subunit 9Ba OS=Danio rerio OX=7955 GN=ppp1r9ba PE=4 SV=1	88472	9	ppp1r9ba
tr|Q8UUT5|Q8UUT5_DANRE	0.254992	1.19333	0.494241	tr|Q8UUT5|Q8UUT5_DANRE DMalpha2a OS=Danio rerio OX=7955 GN=plp1b PE=1 SV=1	27380	1	plp1b
tr|Q6DC92|Q6DC92_DANRE	0.254586	1.19299	0.232269	tr|Q6DC92|Q6DC92_DANRE Small monomeric GTPase OS=Danio rerio OX=7955 GN=ralba PE=1 SV=1	23464	3	ralba
tr|F1R350|F1R350_DANRE	0.254367	1.19281	0.457384	tr|F1R350|F1R350_DANRE Opioid-binding protein/cell adhesion molecule-like OS=Danio rerio OX=7955 GN=opcml PE=1 SV=1	37479	10	opcml
tr|A0A2R8Q971|A0A2R8Q971_DANRE	0.254101	1.19259	0.539784	tr|A0A2R8Q971|A0A2R8Q971_DANRE Rho GTPase-activating protein 17b OS=Danio rerio OX=7955 GN=arhgap17b PE=1 SV=1	73883	4	arhgap17b
tr|E7FB00|E7FB00_DANRE	0.254031	1.19253	0.484505	tr|E7FB00|E7FB00_DANRE Synaptotagmin-like 5 OS=Danio rerio OX=7955 GN=sytl5 PE=4 SV=3	74966	10	sytl5
tr|E9QCP4|E9QCP4_DANRE	0.254002	1.19251	0.308444	tr|E9QCP4|E9QCP4_DANRE Lysosomal-associated membrane protein 1b OS=Danio rerio OX=7955 GN=lamp1b PE=1 SV=1	27223	1	lamp1b
sp|Q7SYN5|RXRBA_DANRE	0.253762	1.19231	0.567359	sp|Q7SYN5|RXRBA_DANRE Retinoic acid receptor RXR-beta-A OS=Danio rerio OX=7955 GN=rxrba PE=2 SV=1	51597	5	rxrba
tr|I3ISI4|I3ISI4_DANRE	0.253448	1.19205	0.287575	tr|I3ISI4|I3ISI4_DANRE Fatty acid-binding protein 3, muscle and heart OS=Danio rerio OX=7955 GN=fabp3 PE=1 SV=1	10989	1	fabp3
tr|F1QPQ4|F1QPQ4_DANRE	0.253218	1.19186	0.226542	tr|F1QPQ4|F1QPQ4_DANRE Diaphanous-related formin 2 OS=Danio rerio OX=7955 GN=diaph2 PE=1 SV=3	106046	4	diaph2
tr|F6P3V2|F6P3V2_DANRE	0.253216	1.19186	0.49163	tr|F6P3V2|F6P3V2_DANRE Tectonin beta-propeller repeat-containing 2 OS=Danio rerio OX=7955 GN=tecpr2 PE=4 SV=1	150607	8	tecpr2
tr|Q6PHG0|Q6PHG0_DANRE	0.253107	1.19177	0.147768	tr|Q6PHG0|Q6PHG0_DANRE Golgi-associated PDZ and coiled-coil motif-containing OS=Danio rerio OX=7955 GN=gopc PE=1 SV=1	49816	10	gopc
tr|A0JMP2|A0JMP2_DANRE	0.252988	1.19167	0.594058	tr|A0JMP2|A0JMP2_DANRE Protein phosphatase, Mg2+/Mn2+-dependent, 1La OS=Danio rerio OX=7955 GN=ppm1la PE=1 SV=1	40695	7	ppm1la
tr|F1RDC0|F1RDC0_DANRE	0.252743	1.19147	0.563464	tr|F1RDC0|F1RDC0_DANRE Autophagy protein 5 OS=Danio rerio OX=7955 GN=atg5 PE=3 SV=1	32130	8	atg5
tr|F1QJ49|F1QJ49_DANRE	0.25243	1.19121	0.573224	tr|F1QJ49|F1QJ49_DANRE Protein kinase, AMP-activated, gamma 2 non-catalytic subunit a OS=Danio rerio OX=7955 GN=prkag2a PE=1 SV=3	48946	5	prkag2a
tr|Q2VYD7|Q2VYD7_DANRE	0.2524	1.19119	0.387652	tr|Q2VYD7|Q2VYD7_DANRE Hypoxanthine phosphoribosyltransferase OS=Danio rerio OX=7955 GN=prtfdc1b PE=2 SV=1	25501	3	prtfdc1b
tr|F1RBW3|F1RBW3_DANRE	0.252243	1.19106	0.175495	tr|F1RBW3|F1RBW3_DANRE Glucosidase 2 subunit beta OS=Danio rerio OX=7955 GN=prkcsh PE=1 SV=1	59643	7	prkcsh
tr|R4GE02|R4GE02_DANRE	0.252093	1.19093	0.443615	tr|R4GE02|R4GE02_DANRE Si:ch211-113a14.11 OS=Danio rerio OX=7955 GN=si:ch211-113a14.11 PE=1 SV=1	27149	8	si:ch211-113a14.11
sp|Q2YDR3|IMPA3_DANRE	0.250983	1.19002	0.121722	sp|Q2YDR3|IMPA3_DANRE Inositol monophosphatase 3 OS=Danio rerio OX=7955 GN=bpnt2 PE=2 SV=1	37432	5	bpnt2
sp|Q6P963|GLO2_DANRE	0.250938	1.18998	0.238986	sp|Q6P963|GLO2_DANRE Hydroxyacylglutathione hydrolase, mitochondrial OS=Danio rerio OX=7955 GN=hagh PE=2 SV=2	33806	10	hagh
sp|Q4KME6|GGYF2_DANRE	0.250458	1.18958	0.609403	sp|Q4KME6|GGYF2_DANRE GRB10-interacting GYF protein 2 OS=Danio rerio OX=7955 GN=gigyf2 PE=2 SV=2	152268	5	gigyf2
tr|F6NVJ1|F6NVJ1_DANRE	0.250144	1.18933	0.402237	tr|F6NVJ1|F6NVJ1_DANRE Heat shock 10 protein 1 OS=Danio rerio OX=7955 GN=hspe1 PE=1 SV=1	10892	4	hspe1
tr|A9JTF6|A9JTF6_DANRE	0.250039	1.18924	0.231838	tr|A9JTF6|A9JTF6_DANRE Zgc:175096 protein OS=Danio rerio OX=7955 GN=znf576.2 PE=2 SV=1	44867	3	znf576.2
tr|A0A0G2KQV0|A0A0G2KQV0_DANRE	0.250013	1.18922	0.550981	tr|A0A0G2KQV0|A0A0G2KQV0_DANRE Guanylate cyclase domain-containing protein OS=Danio rerio OX=7955 PE=3 SV=2	38582	1	Uncharacterized protein
tr|F1R4J4|F1R4J4_DANRE	0.249853	1.18909	0.699125	tr|F1R4J4|F1R4J4_DANRE Acyl-CoA oxidase-like (Fragment) OS=Danio rerio OX=7955 GN=acoxl PE=3 SV=1	70511	9	acoxl
tr|Q7SXR2|Q7SXR2_DANRE	0.249787	1.18903	0.265984	tr|Q7SXR2|Q7SXR2_DANRE DnaJ (Hsp40) homolog, subfamily B, member 12 OS=Danio rerio OX=7955 GN=dnajb12a PE=1 SV=1	42494	1	dnajb12a
tr|F1QTX8|F1QTX8_DANRE	0.249577	1.18886	0.162698	tr|F1QTX8|F1QTX8_DANRE Protein disulfide-isomerase OS=Danio rerio OX=7955 GN=pdia8 PE=3 SV=1	55700	20	pdia8
tr|Q6DH63|Q6DH63_DANRE	0.24891	1.18831	0.165397	tr|Q6DH63|Q6DH63_DANRE Cytochrome c oxidase subunit OS=Danio rerio OX=7955 GN=cox6b1 PE=1 SV=1	10334	4	cox6b1
tr|A0A0R4IYK1|A0A0R4IYK1_DANRE	0.24888	1.18828	0.495474	tr|A0A0R4IYK1|A0A0R4IYK1_DANRE Kalirin RhoGEF kinase a (Fragment) OS=Danio rerio OX=7955 GN=kalrna PE=4 SV=2	275779	4	kalrna
tr|A7MCK9|A7MCK9_DANRE	0.248668	1.18811	0.21564	tr|A7MCK9|A7MCK9_DANRE Sec22bb protein OS=Danio rerio OX=7955 GN=sec22bb PE=1 SV=1	25091	2	sec22bb
tr|F1RA07|F1RA07_DANRE	0.248347	1.18785	0.354462	tr|F1RA07|F1RA07_DANRE Si:ch73-212j7.1 OS=Danio rerio OX=7955 GN=si:ch73-212j7.1 PE=3 SV=3	185873	24	si:ch73-212j7.1
sp|Q7ZV80|SPF30_DANRE	0.247927	1.1875	0.351133	sp|Q7ZV80|SPF30_DANRE Survival of motor neuron-related-splicing factor 30 OS=Danio rerio OX=7955 GN=smndc1 PE=2 SV=1	26940	4	smndc1
tr|A0A0R4IJG1|A0A0R4IJG1_DANRE	0.247584	1.18722	0.129818	tr|A0A0R4IJG1|A0A0R4IJG1_DANRE Non-specific serine/threonine protein kinase OS=Danio rerio OX=7955 GN=mark2b PE=1 SV=2	84756	15	mark2b
tr|A0A0R4IHF0|A0A0R4IHF0_DANRE	0.24742	1.18708	0.694789	tr|A0A0R4IHF0|A0A0R4IHF0_DANRE Protein kinase C and casein kinase substrate in neurons 2 OS=Danio rerio OX=7955 GN=pacsin2 PE=1 SV=1	56216	5	pacsin2
tr|A0A2R8QPJ6|A0A2R8QPJ6_DANRE	0.246974	1.18672	0.0952866	tr|A0A2R8QPJ6|A0A2R8QPJ6_DANRE Plexin A2 OS=Danio rerio OX=7955 GN=plxna2 PE=1 SV=1	212329	33	plxna2
tr|A0A0R4IS70|A0A0R4IS70_DANRE	0.246969	1.18671	0.426143	tr|A0A0R4IS70|A0A0R4IS70_DANRE Purine-rich element-binding protein Ba OS=Danio rerio OX=7955 GN=purba PE=1 SV=1	34117	5	purba
tr|Q1LU92|Q1LU92_DANRE	0.246951	1.1867	0.474692	tr|Q1LU92|Q1LU92_DANRE Catenin (cadherin-associated protein), alpha-like 1 OS=Danio rerio OX=7955 GN=ctnnal1 PE=1 SV=2	83547	9	ctnnal1
tr|Q66HV5|Q66HV5_DANRE	0.246756	1.18654	0.493745	tr|Q66HV5|Q66HV5_DANRE Zgc:92481 OS=Danio rerio OX=7955 GN=vwa5a PE=2 SV=1	87176	20	vwa5a
tr|F1QCH7|F1QCH7_DANRE	0.246728	1.18651	0.236311	tr|F1QCH7|F1QCH7_DANRE Zgc:162816 (Fragment) OS=Danio rerio OX=7955 GN=zgc:162816 PE=1 SV=2	46909	10	zgc:162816
tr|A0A0R4IS02|A0A0R4IS02_DANRE	0.246624	1.18643	0.6053	tr|A0A0R4IS02|A0A0R4IS02_DANRE SH3GL-interacting endocytic adaptor 1b OS=Danio rerio OX=7955 GN=sgip1b PE=4 SV=1	78016	7	sgip1b
tr|Q6P3G2|Q6P3G2_DANRE	0.246467	1.1863	0.385123	tr|Q6P3G2|Q6P3G2_DANRE Sorting nexin 27b OS=Danio rerio OX=7955 GN=snx27b PE=2 SV=1	64163	10	snx27b
tr|F6P8R2|F6P8R2_DANRE	0.246408	1.18625	0.129535	tr|F6P8R2|F6P8R2_DANRE Oxysterol-binding protein OS=Danio rerio OX=7955 GN=osbp PE=1 SV=1	85818	17	osbp
tr|E7EXN0|E7EXN0_DANRE	0.246304	1.18616	0.669966	tr|E7EXN0|E7EXN0_DANRE Protein odr-4 homolog OS=Danio rerio OX=7955 GN=odr4 PE=1 SV=2	49714	3	odr4
tr|B8A6D0|B8A6D0_DANRE	0.246261	1.18613	0.497682	tr|B8A6D0|B8A6D0_DANRE COMM domain-containing protein 1 OS=Danio rerio OX=7955 GN=commd1 PE=1 SV=1	21247	5	commd1
tr|A2CEB2|A2CEB2_DANRE	0.246158	1.18604	0.577142	tr|A2CEB2|A2CEB2_DANRE Ankle2 protein OS=Danio rerio OX=7955 GN=ankle2 PE=2 SV=1	106381	7	ankle2
tr|A0A0G2KI30|A0A0G2KI30_DANRE	0.246068	1.18597	0.4677	tr|A0A0G2KI30|A0A0G2KI30_DANRE ATP binding cassette subfamily D member 2 OS=Danio rerio OX=7955 PE=4 SV=2	27155	3	Uncharacterized protein
tr|K7QPK9|K7QPK9_DANRE	0.245892	1.18583	0.605502	tr|K7QPK9|K7QPK9_DANRE Bassoon b (Fragment) OS=Danio rerio OX=7955 GN=bsnb PE=2 SV=1	36207	3	bsnb
tr|A0A0R4IQU4|A0A0R4IQU4_DANRE	0.245698	1.18567	0.477619	tr|A0A0R4IQU4|A0A0R4IQU4_DANRE Leucine-rich repeat and sterile alpha motif-containing 1 OS=Danio rerio OX=7955 GN=lrsam1 PE=1 SV=1	81841	22	lrsam1
tr|Q6P0B2|Q6P0B2_DANRE	0.245697	1.18567	0.376296	tr|Q6P0B2|Q6P0B2_DANRE C19orf13-like protein OS=Danio rerio OX=7955 GN=lsm14ab PE=1 SV=1	48311	6	lsm14ab
tr|F1QEY8|F1QEY8_DANRE	0.245618	1.1856	0.0369342	tr|F1QEY8|F1QEY8_DANRE D-3-phosphoglycerate dehydrogenase OS=Danio rerio OX=7955 GN=phgdh PE=1 SV=1	55612	4	phgdh
tr|E7F6D6|E7F6D6_DANRE	0.245594	1.18558	0.558047	tr|E7F6D6|E7F6D6_DANRE Si:ch1073-174d20.2 OS=Danio rerio OX=7955 GN=afg3l1 PE=1 SV=1	83001	8	afg3l1
sp|Q6P011|EMC4_DANRE	0.245529	1.18553	0.336273	sp|Q6P011|EMC4_DANRE ER membrane protein complex subunit 4 OS=Danio rerio OX=7955 GN=emc4 PE=2 SV=1	20692	3	emc4
tr|F1QKS4|F1QKS4_DANRE	0.245386	1.18541	0.117017	tr|F1QKS4|F1QKS4_DANRE Calnexin OS=Danio rerio OX=7955 GN=canx PE=1 SV=1	67875	18	canx
sp|Q7ZVC4|CHM4B_DANRE	0.243449	1.18382	0.356004	sp|Q7ZVC4|CHM4B_DANRE Charged multivesicular body protein 4b OS=Danio rerio OX=7955 GN=chmp4b PE=2 SV=1	24796	6	chmp4b
tr|Q6NV13|Q6NV13_DANRE	0.243158	1.18358	0.0579168	tr|Q6NV13|Q6NV13_DANRE Nuclear distribution protein C homolog OS=Danio rerio OX=7955 GN=nudc PE=1 SV=1	38367	15	nudc
tr|Q78AN2|Q78AN2_DANRE	0.242638	1.18315	0.277792	tr|Q78AN2|Q78AN2_DANRE Ganglioside-induced differentiation-associated protein 1 OS=Danio rerio OX=7955 GN=gdap1 PE=2 SV=1	41469	12	gdap1
sp|Q1LXS2|PSMG2_DANRE	0.242633	1.18315	0.55573	sp|Q1LXS2|PSMG2_DANRE Proteasome assembly chaperone 2 OS=Danio rerio OX=7955 GN=psmg2 PE=2 SV=1	28960	7	psmg2
tr|Q7ZWC9|Q7ZWC9_DANRE	0.242498	1.18304	0.251639	tr|Q7ZWC9|Q7ZWC9_DANRE 1-acylglycerol-3-phosphate O-acyltransferase 3 OS=Danio rerio OX=7955 GN=agpat3 PE=2 SV=1	43849	9	agpat3
sp|Q5U3U0|PHYD1_DANRE	0.242452	1.183	0.686794	sp|Q5U3U0|PHYD1_DANRE Phytanoyl-CoA dioxygenase domain-containing protein 1 OS=Danio rerio OX=7955 GN=phyhd1 PE=2 SV=1	33194	7	phyhd1
tr|G5CTT5|G5CTT5_DANRE	0.242236	1.18282	0.332311	tr|G5CTT5|G5CTT5_DANRE Polynucleotide phosphorylase 1 OS=Danio rerio OX=7955 PE=2 SV=1	85068	13	Uncharacterized protein
tr|F1R647|F1R647_DANRE	0.242003	1.18263	0.388113	tr|F1R647|F1R647_DANRE EF-hand domain family, member D1 OS=Danio rerio OX=7955 GN=efhd1 PE=4 SV=1	26249	2	efhd1
tr|F1R7K0|F1R7K0_DANRE	0.241607	1.18231	0.172248	tr|F1R7K0|F1R7K0_DANRE Sidoreflexin OS=Danio rerio OX=7955 GN=sfxn5b PE=1 SV=1	35908	10	sfxn5b
tr|Q66HX7|Q66HX7_DANRE	0.241272	1.18203	0.486479	tr|Q66HX7|Q66HX7_DANRE Ferritin OS=Danio rerio OX=7955 GN=fth1b PE=1 SV=1	20697	4	fth1b
tr|F1QPP5|F1QPP5_DANRE	0.241071	1.18187	0.396045	tr|F1QPP5|F1QPP5_DANRE CSN12-like protein OS=Danio rerio OX=7955 GN=pcid2 PE=1 SV=1	46040	3	pcid2
tr|A0A0R4IU05|A0A0R4IU05_DANRE	0.241054	1.18186	0.300459	tr|A0A0R4IU05|A0A0R4IU05_DANRE AP-1 complex subunit gamma OS=Danio rerio OX=7955 GN=ap1g1 PE=1 SV=1	91094	2	ap1g1
sp|A4IFW2|PTPRF_DANRE	0.2409	1.18173	0.149447	sp|A4IFW2|PTPRF_DANRE Receptor-type tyrosine-protein phosphatase F OS=Danio rerio OX=7955 GN=ptprf PE=2 SV=1	213454	22	ptprf
tr|E9QCW1|E9QCW1_DANRE	0.240878	1.18171	0.502149	tr|E9QCW1|E9QCW1_DANRE Calcium channel, voltage-dependent, gamma subunit 8b OS=Danio rerio OX=7955 GN=cacng8b PE=3 SV=1	45466	6	cacng8b
tr|A0A0J9YIW5|A0A0J9YIW5_DANRE	0.240571	1.18146	0.117493	tr|A0A0J9YIW5|A0A0J9YIW5_DANRE RAB, member RAS oncogene family-like 6b (Fragment) OS=Danio rerio OX=7955 GN=rabl6b PE=4 SV=3	84039	14	rabl6b
tr|F1Q9A4|F1Q9A4_DANRE	0.24048	1.18139	0.421054	tr|F1Q9A4|F1Q9A4_DANRE Cytochrome c oxidase subunit 7A2a OS=Danio rerio OX=7955 GN=cox7a2a PE=1 SV=1	9568	2	cox7a2a
tr|F1RAJ3|F1RAJ3_DANRE	0.24038	1.1813	0.281819	tr|F1RAJ3|F1RAJ3_DANRE Spectrin, beta, non-erythrocytic 4b (Fragment) OS=Danio rerio OX=7955 GN=sptbn4b PE=1 SV=2	142207	15	sptbn4b
sp|Q6PGY6|UFL1_DANRE	0.240346	1.18128	0.3841	sp|Q6PGY6|UFL1_DANRE E3 UFM1-protein ligase 1 OS=Danio rerio OX=7955 GN=ufl1 PE=2 SV=1	88679	1	ufl1
tr|Q6IQG3|Q6IQG3_DANRE	0.240275	1.18122	0.233672	tr|Q6IQG3|Q6IQG3_DANRE Protein farnesyltransferase subunit beta OS=Danio rerio OX=7955 GN=fntb PE=1 SV=1	46425	6	fntb
sp|Q5TYV0|EMC7_DANRE	0.240268	1.18121	0.0947451	sp|Q5TYV0|EMC7_DANRE ER membrane protein complex subunit 7 OS=Danio rerio OX=7955 GN=emc7 PE=2 SV=1	26560	3	emc7
tr|A0A2R8Q3V3|A0A2R8Q3V3_DANRE	0.23986	1.18088	0.277833	tr|A0A2R8Q3V3|A0A2R8Q3V3_DANRE LLGL scribble cell polarity complex component 2 OS=Danio rerio OX=7955 GN=llgl2 PE=1 SV=1	111976	21	llgl2
sp|Q2PW47|MED24_DANRE	0.239828	1.18085	0.508792	sp|Q2PW47|MED24_DANRE Mediator of RNA polymerase II transcription subunit 24 OS=Danio rerio OX=7955 GN=med24 PE=2 SV=2	110862	6	med24
tr|Q5U3J4|Q5U3J4_DANRE	0.239606	1.18067	0.346313	tr|Q5U3J4|Q5U3J4_DANRE Clathrin interactor 1 OS=Danio rerio OX=7955 GN=clint1a PE=1 SV=1	68686	5	clint1a
sp|F1QMB9|CCNK_DANRE	0.239396	1.1805	0.435723	sp|F1QMB9|CCNK_DANRE Cyclin-K OS=Danio rerio OX=7955 GN=ccnk PE=2 SV=3	47894	5	ccnk
tr|A0A2R8Q6J4|A0A2R8Q6J4_DANRE	0.239054	1.18022	0.600979	tr|A0A2R8Q6J4|A0A2R8Q6J4_DANRE Zgc:92027 OS=Danio rerio OX=7955 GN=gca PE=1 SV=1	23126	10	gca
tr|Q6TLH5|Q6TLH5_DANRE	0.238968	1.18015	0.388723	tr|Q6TLH5|Q6TLH5_DANRE Oxysterol-binding protein OS=Danio rerio OX=7955 GN=osbpl2b PE=2 SV=1	53927	6	osbpl2b
tr|Q7ZVK2|Q7ZVK2_DANRE	0.238435	1.17971	0.21025	tr|Q7ZVK2|Q7ZVK2_DANRE Ubiquitin-conjugating enzyme E2G 1a (UBC7 homolog, yeast) OS=Danio rerio OX=7955 GN=ube2g1a PE=1 SV=1	19516	4	ube2g1a
tr|A0A0R4IBD6|A0A0R4IBD6_DANRE	0.238399	1.17968	0.558803	tr|A0A0R4IBD6|A0A0R4IBD6_DANRE 5'-(N(7)-methylguanosine 5'-triphospho)-[mRNA] hydrolase OS=Danio rerio OX=7955 GN=dcp1a PE=1 SV=1	47706	6	dcp1a
tr|Q4V946|Q4V946_DANRE	0.238093	1.17943	0.263709	tr|Q4V946|Q4V946_DANRE Geranylgeranyl transferase type-2 subunit beta OS=Danio rerio OX=7955 GN=rabggtb PE=1 SV=1	36692	6	rabggtb
tr|A1L101|A1L101_DANRE	0.238025	1.17938	0.199996	tr|A1L101|A1L101_DANRE Zgc:153460 OS=Danio rerio OX=7955 GN=ttc7b PE=2 SV=1	94540	26	ttc7b
sp|Q6P104|QKIB_DANRE	0.237946	1.17931	0.0727803	sp|Q6P104|QKIB_DANRE Protein quaking-B OS=Danio rerio OX=7955 GN=qkib PE=2 SV=1	35256	6	qkib
tr|E7F3X8|E7F3X8_DANRE	0.237061	1.17859	0.623648	tr|E7F3X8|E7F3X8_DANRE Testis-expressed 2,-like OS=Danio rerio OX=7955 GN=tex2l PE=4 SV=1	111627	2	tex2l
tr|Q1LYC9|Q1LYC9_DANRE	0.236967	1.17851	0.128411	tr|Q1LYC9|Q1LYC9_DANRE Calpain, small subunit 1 a OS=Danio rerio OX=7955 GN=capns1a PE=1 SV=1	24433	8	capns1a
tr|A0A0R4IY87|A0A0R4IY87_DANRE	0.23693	1.17848	0.115133	tr|A0A0R4IY87|A0A0R4IY87_DANRE Ankyrin repeat domain 13 family, member D OS=Danio rerio OX=7955 GN=ankrd13d PE=4 SV=1	69900	8	ankrd13d
tr|F6NJQ3|F6NJQ3_DANRE	0.236805	1.17838	0.217858	tr|F6NJQ3|F6NJQ3_DANRE Protocadherin 1a OS=Danio rerio OX=7955 GN=pcdh1a PE=4 SV=1	129145	14	pcdh1a
tr|Q7SXW1|Q7SXW1_DANRE	0.236635	1.17824	0.413806	tr|Q7SXW1|Q7SXW1_DANRE Tropomyosin 4b OS=Danio rerio OX=7955 GN=tpm4b PE=1 SV=1	28731	1	tpm4b
tr|A0A0R4ISX2|A0A0R4ISX2_DANRE	0.23663	1.17824	0.264494	tr|A0A0R4ISX2|A0A0R4ISX2_DANRE Threonyl-tRNA synthetase OS=Danio rerio OX=7955 GN=tars3 PE=1 SV=1	50374	11	tars3
tr|E7F0E2|E7F0E2_DANRE	0.236621	1.17823	0.17822	tr|E7F0E2|E7F0E2_DANRE Glucosamine-6-phosphate isomerase OS=Danio rerio OX=7955 GN=gnpda2 PE=1 SV=1	31352	10	gnpda2
sp|Q6NZ07|NCLN_DANRE	0.236404	1.17805	0.692815	sp|Q6NZ07|NCLN_DANRE Nicalin-1 OS=Danio rerio OX=7955 GN=ncl1 PE=2 SV=1	63988	12	ncl1
sp|Q561X0|NEPR1_DANRE	0.236138	1.17784	0.172215	sp|Q561X0|NEPR1_DANRE Nuclear envelope phosphatase-regulatory subunit 1 OS=Danio rerio OX=7955 GN=cnep1r1 PE=2 SV=1	14175	2	cnep1r1
tr|A2RV32|A2RV32_DANRE	0.236052	1.17777	0.21204	tr|A2RV32|A2RV32_DANRE Lectin, mannose-binding 2 OS=Danio rerio OX=7955 GN=lman2 PE=2 SV=1	37890	4	lman2
tr|B3DII4|B3DII4_DANRE	0.235763	1.17753	0.348878	tr|B3DII4|B3DII4_DANRE Potassium channel tetramerisation domain containing 16a OS=Danio rerio OX=7955 GN=kctd16a PE=2 SV=1	32962	1	kctd16a
tr|B0S6D0|B0S6D0_DANRE	0.235685	1.17747	0.137148	tr|B0S6D0|B0S6D0_DANRE Neuropilin OS=Danio rerio OX=7955 GN=nrp2b PE=2 SV=1	102642	3	nrp2b
tr|A0A2R8QMW2|A0A2R8QMW2_DANRE	0.235179	1.17705	0.0481992	tr|A0A2R8QMW2|A0A2R8QMW2_DANRE Protein kinase C OS=Danio rerio OX=7955 GN=prkcbb PE=1 SV=1	76368	22	prkcbb
tr|A8WHS2|A8WHS2_DANRE	0.234797	1.17674	0.335857	tr|A8WHS2|A8WHS2_DANRE Ring finger protein 220a OS=Danio rerio OX=7955 GN=rnf220a PE=4 SV=1	63696	3	rnf220a
tr|U3JAV2|U3JAV2_DANRE	0.234546	1.17654	0.57172	tr|U3JAV2|U3JAV2_DANRE NHL repeat-containing 2 OS=Danio rerio OX=7955 GN=nhlrc2 PE=1 SV=1	77504	5	nhlrc2
tr|F1QC69|F1QC69_DANRE	0.234503	1.1765	0.322113	tr|F1QC69|F1QC69_DANRE Regulator of G protein-signaling 3b OS=Danio rerio OX=7955 GN=rgs3b PE=4 SV=2	97088	4	rgs3b
tr|A0A0R4IFM1|A0A0R4IFM1_DANRE	0.234473	1.17648	0.44728	tr|A0A0R4IFM1|A0A0R4IFM1_DANRE Zgc:114120 OS=Danio rerio OX=7955 GN=zgc:114120 PE=4 SV=1	28302	4	zgc:114120
tr|F1RBT8|F1RBT8_DANRE	0.234469	1.17647	0.564623	tr|F1RBT8|F1RBT8_DANRE Ankyrin repeat and sterile alpha motif domain-containing 1Aa (Fragment) OS=Danio rerio OX=7955 GN=anks1aa PE=1 SV=1	35695	2	anks1aa
tr|Q4V9P2|Q4V9P2_DANRE	0.234336	1.17637	0.324274	tr|Q4V9P2|Q4V9P2_DANRE Glutamine-rich 1 OS=Danio rerio OX=7955 GN=qrich1 PE=1 SV=1	79723	4	qrich1
tr|F1QEY7|F1QEY7_DANRE	0.234306	1.17634	0.324303	tr|F1QEY7|F1QEY7_DANRE V-type proton ATPase subunit a OS=Danio rerio OX=7955 GN=atp6v0a1a PE=1 SV=1	95506	2	atp6v0a1a
tr|A0A2R8Q8P9|A0A2R8Q8P9_DANRE	0.233933	1.17604	0.428208	tr|A0A2R8Q8P9|A0A2R8Q8P9_DANRE Mitochondrial calcium uptake family, member 3a OS=Danio rerio OX=7955 GN=micu3a PE=4 SV=1	61529	2	micu3a
tr|F1QNA0|F1QNA0_DANRE	0.233878	1.17599	0.540063	tr|F1QNA0|F1QNA0_DANRE Pitrilysin metalloproteinase 1 OS=Danio rerio OX=7955 GN=pitrm1 PE=1 SV=1	114970	1	pitrm1
tr|Q7T3D4|Q7T3D4_DANRE	0.233783	1.17591	0.357226	tr|Q7T3D4|Q7T3D4_DANRE Cdc73 protein OS=Danio rerio OX=7955 GN=cdc73 PE=1 SV=1	59431	16	cdc73
tr|Q6P3L9|Q6P3L9_DANRE	0.23347	1.17566	0.123594	tr|Q6P3L9|Q6P3L9_DANRE Glutamate dehydrogenase (NAD(P)(+)) OS=Danio rerio OX=7955 GN=glud1b PE=1 SV=1	59977	13	glud1b
tr|Q6P6E4|Q6P6E4_DANRE	0.233325	1.17554	0.194851	tr|Q6P6E4|Q6P6E4_DANRE U6 snRNA-associated Sm-like protein LSm4 OS=Danio rerio OX=7955 GN=lsm4 PE=1 SV=1	15710	6	lsm4
tr|F1R355|F1R355_DANRE	0.233304	1.17552	0.477046	tr|F1R355|F1R355_DANRE Cytochrome c oxidase assembly homolog 15 (yeast) OS=Danio rerio OX=7955 GN=cox15 PE=1 SV=1	44724	6	cox15
tr|K7DYM1|K7DYM1_DANRE	0.233196	1.17544	0.760175	tr|K7DYM1|K7DYM1_DANRE Si:ch211-201o1.1 OS=Danio rerio OX=7955 GN=si:ch211-201o1.1 PE=4 SV=2	138519	4	si:ch211-201o1.1
tr|A0A2R8Q4T9|A0A2R8Q4T9_DANRE	0.232977	1.17526	0.539893	tr|A0A2R8Q4T9|A0A2R8Q4T9_DANRE SGT1 homolog, MIS12 kinetochore complex assembly cochaperone OS=Danio rerio OX=7955 GN=sugt1 PE=1 SV=1	37935	13	sugt1
sp|Q1LYG0|SPD2A_DANRE	0.232864	1.17517	0.557548	sp|Q1LYG0|SPD2A_DANRE SH3 and PX domain-containing protein 2A OS=Danio rerio OX=7955 GN=sh3pxd2a PE=3 SV=2	124906	5	sh3pxd2a
tr|A0A0R4IQS8|A0A0R4IQS8_DANRE	0.232674	1.17501	0.365513	tr|A0A0R4IQS8|A0A0R4IQS8_DANRE Calcium-transporting ATPase OS=Danio rerio OX=7955 GN=atp2a2b PE=1 SV=1	114250	13	atp2a2b
tr|E7F0T7|E7F0T7_DANRE	0.232085	1.17453	0.192474	tr|E7F0T7|E7F0T7_DANRE Guanine nucleotide binding protein (G protein), beta polypeptide 4a OS=Danio rerio OX=7955 GN=gnb4a PE=1 SV=1	27390	3	gnb4a
tr|A0A0R4IT73|A0A0R4IT73_DANRE	0.231805	1.1743	0.405055	tr|A0A0R4IT73|A0A0R4IT73_DANRE RNA-binding fox-1 homolog 3a (Fragment) OS=Danio rerio OX=7955 GN=rbfox3a PE=4 SV=1	35024	1	rbfox3a
tr|A0A2R8QGJ9|A0A2R8QGJ9_DANRE	0.231771	1.17428	0.713446	tr|A0A2R8QGJ9|A0A2R8QGJ9_DANRE E2 ubiquitin-conjugating enzyme OS=Danio rerio OX=7955 GN=ube2kb PE=1 SV=1	23496	2	ube2kb
tr|A0A0R4IY14|A0A0R4IY14_DANRE	0.231647	1.17417	0.493523	tr|A0A0R4IY14|A0A0R4IY14_DANRE Si:dkey-182g1.2 OS=Danio rerio OX=7955 GN=si:dkey-182g1.2 PE=4 SV=2	29588	2	si:dkey-182g1.2
sp|P61485|RL36A_DANRE	0.231578	1.17412	0.416503	sp|P61485|RL36A_DANRE 60S ribosomal protein L36a OS=Danio rerio OX=7955 GN=rpl36a PE=3 SV=2	12528	1	rpl36a
tr|F1QK92|F1QK92_DANRE	0.231168	1.17378	0.15389	tr|F1QK92|F1QK92_DANRE Ubiquinol-cytochrome c reductase complex assembly factor 1 OS=Danio rerio OX=7955 GN=uqcc1 PE=1 SV=1	32808	8	uqcc1
tr|A0A2R8PXB7|A0A2R8PXB7_DANRE	0.231127	1.17375	0.31738	tr|A0A2R8PXB7|A0A2R8PXB7_DANRE Chromobox homolog 3a (HP1 gamma homolog, Drosophila) OS=Danio rerio OX=7955 GN=cbx3a PE=1 SV=1	20044	7	cbx3a
tr|A0A2R8Q2T0|A0A2R8Q2T0_DANRE	0.230919	1.17358	0.238836	tr|A0A2R8Q2T0|A0A2R8Q2T0_DANRE Tyrosine-protein phosphatase non-receptor type OS=Danio rerio OX=7955 GN=ptpn6 PE=3 SV=1	67167	4	ptpn6
tr|A2BIM6|A2BIM6_DANRE	0.230472	1.17322	0.496598	tr|A2BIM6|A2BIM6_DANRE Small ArfGAP 1 OS=Danio rerio OX=7955 GN=smap1 PE=1 SV=1	51352	5	smap1
tr|A0A0R4ITZ2|A0A0R4ITZ2_DANRE	0.230245	1.17303	0.0962753	tr|A0A0R4ITZ2|A0A0R4ITZ2_DANRE Protein VAC14 homolog OS=Danio rerio OX=7955 GN=vac14 PE=1 SV=1	88621	27	vac14
tr|A4FUL3|A4FUL3_DANRE	0.230099	1.17292	0.664005	tr|A4FUL3|A4FUL3_DANRE Rbx1 protein OS=Danio rerio OX=7955 GN=rbx1 PE=1 SV=1	12274	5	rbx1
tr|A0A2R8RS17|A0A2R8RS17_DANRE	0.230058	1.17288	0.0815584	tr|A0A2R8RS17|A0A2R8RS17_DANRE Si:ch211-66e2.5 OS=Danio rerio OX=7955 GN=si:ch211-66e2.5 PE=4 SV=1	34942	3	si:ch211-66e2.5
tr|A0A2R8RXH6|A0A2R8RXH6_DANRE	0.230012	1.17284	0.282681	tr|A0A2R8RXH6|A0A2R8RXH6_DANRE Family with sequence similarity 120A OS=Danio rerio OX=7955 GN=fam120a PE=3 SV=1	113198	17	fam120a
tr|E7F4T4|E7F4T4_DANRE	0.229994	1.17283	0.214167	tr|E7F4T4|E7F4T4_DANRE Zinc finger CCCH-type-containing 7Bb OS=Danio rerio OX=7955 GN=zc3h7bb PE=1 SV=1	99876	21	zc3h7bb
tr|F8W409|F8W409_DANRE	0.229827	1.17269	0.0703553	tr|F8W409|F8W409_DANRE Kinesin family member 21A OS=Danio rerio OX=7955 GN=kif21a PE=4 SV=2	178903	1	kif21a
tr|A3KNS6|A3KNS6_DANRE	0.229678	1.17257	0.313966	tr|A3KNS6|A3KNS6_DANRE Zgc:114114 protein OS=Danio rerio OX=7955 GN=mrpl44 PE=2 SV=1	37110	7	mrpl44
tr|A0A2R8QI56|A0A2R8QI56_DANRE	0.229603	1.17251	0.275903	tr|A0A2R8QI56|A0A2R8QI56_DANRE Ubiquitin-conjugating enzyme E2L 3a OS=Danio rerio OX=7955 GN=ube2l3a PE=1 SV=1	20020	1	ube2l3a
tr|A0A0R4IBA8|A0A0R4IBA8_DANRE	0.229281	1.17225	0.309297	tr|A0A0R4IBA8|A0A0R4IBA8_DANRE Purine nucleoside phosphorylase OS=Danio rerio OX=7955 GN=pnp5b PE=3 SV=1	32167	15	pnp5b
tr|Q7ZW04|Q7ZW04_DANRE	0.229196	1.17218	0.180351	tr|Q7ZW04|Q7ZW04_DANRE S-adenosylmethionine synthase OS=Danio rerio OX=7955 GN=mat1a PE=1 SV=1	43289	1	mat1a
tr|B2CZC4|B2CZC4_DANRE	0.229153	1.17215	0.368803	tr|B2CZC4|B2CZC4_DANRE Sodium/calcium exchanger 2 isoform b OS=Danio rerio OX=7955 GN=slc8a2b PE=1 SV=1	106746	18	slc8a2b
tr|Q5RHP5|Q5RHP5_DANRE	0.229092	1.1721	0.285133	tr|Q5RHP5|Q5RHP5_DANRE Acyl-Coenzyme A-binding domain-containing 3 OS=Danio rerio OX=7955 GN=acbd3 PE=1 SV=1	60613	5	acbd3
sp|Q1LVF3|SMG7_DANRE	0.2287	1.17178	0.623262	sp|Q1LVF3|SMG7_DANRE Nonsense-mediated mRNA decay factor SMG7 OS=Danio rerio OX=7955 GN=smg7 PE=2 SV=2	132344	6	smg7
tr|B0V199|B0V199_DANRE	0.228531	1.17164	0.581623	tr|B0V199|B0V199_DANRE Very-long-chain (3R)-3-hydroxyacyl-CoA dehydratase OS=Danio rerio OX=7955 GN=hacd2 PE=1 SV=1	27816	3	hacd2
tr|A4FVH5|A4FVH5_DANRE	0.228259	1.17142	0.184778	tr|A4FVH5|A4FVH5_DANRE Map2k4 protein (Fragment) OS=Danio rerio OX=7955 GN=map2k4a PE=2 SV=1	45223	9	map2k4a
tr|A4IFW7|A4IFW7_DANRE	0.228176	1.17135	0.671861	tr|A4IFW7|A4IFW7_DANRE Arginyl-tRNA--protein transferase 1 OS=Danio rerio OX=7955 GN=ate1 PE=2 SV=1	56209	1	ate1
tr|F1QXJ4|F1QXJ4_DANRE	0.228111	1.1713	0.340152	tr|F1QXJ4|F1QXJ4_DANRE Syntaxin-binding protein 3 OS=Danio rerio OX=7955 GN=stxbp3 PE=1 SV=1	67321	18	stxbp3
tr|A7MCK5|A7MCK5_DANRE	0.22797	1.17119	0.305808	tr|A7MCK5|A7MCK5_DANRE Nudt9 protein OS=Danio rerio OX=7955 GN=nudt9 PE=2 SV=1	36792	4	nudt9
tr|A0A2I4KBP1|A0A2I4KBP1_DANRE	0.227867	1.1711	0.365081	tr|A0A2I4KBP1|A0A2I4KBP1_DANRE Gigaxonin OS=Danio rerio OX=7955 GN=gan PE=2 SV=1	68559	13	gan
tr|A0A2R8QKD1|A0A2R8QKD1_DANRE	0.227583	1.17087	0.13813	tr|A0A2R8QKD1|A0A2R8QKD1_DANRE Sarcolemma-associated protein b OS=Danio rerio OX=7955 GN=slmapb PE=1 SV=1	43614	21	slmapb
tr|Q5TZ12|Q5TZ12_DANRE	0.226872	1.17029	0.191866	tr|Q5TZ12|Q5TZ12_DANRE PRKC, apoptosis, WT1, regulator OS=Danio rerio OX=7955 GN=pawr PE=4 SV=1	30106	1	pawr
tr|Q6PC80|Q6PC80_DANRE	0.226789	1.17023	0.358615	tr|Q6PC80|Q6PC80_DANRE Ribosomal protein S5 OS=Danio rerio OX=7955 GN=rps5 PE=1 SV=1	22872	9	rps5
tr|Q7ZVH4|Q7ZVH4_DANRE	0.226742	1.17019	0.401029	tr|Q7ZVH4|Q7ZVH4_DANRE 1700012G19-like protein OS=Danio rerio OX=7955 GN=pgp PE=2 SV=1	33271	1	pgp
tr|F6P2R4|F6P2R4_DANRE	0.226613	1.17008	0.389235	tr|F6P2R4|F6P2R4_DANRE Glycine C-acetyltransferase OS=Danio rerio OX=7955 GN=gcat PE=1 SV=1	46453	14	gcat
tr|A0A0R4IQI8|A0A0R4IQI8_DANRE	0.226515	1.17001	0.661294	tr|A0A0R4IQI8|A0A0R4IQI8_DANRE Polybromo 1 OS=Danio rerio OX=7955 GN=pbrm1 PE=1 SV=1	185327	13	pbrm1
tr|E7FC90|E7FC90_DANRE	0.226363	1.16988	0.3683	tr|E7FC90|E7FC90_DANRE Target of myb1 like 2 membrane trafficking protein OS=Danio rerio OX=7955 GN=tom1l2 PE=3 SV=2	55693	9	tom1l2
tr|A0A2R8PZB2|A0A2R8PZB2_DANRE	0.226283	1.16982	0.251093	tr|A0A2R8PZB2|A0A2R8PZB2_DANRE Si:dkey-156n14.5 OS=Danio rerio OX=7955 GN=ddx17 PE=1 SV=1	75657	10	ddx17
sp|Q0E671|NEUAA_DANRE	0.226125	1.16969	0.166926	sp|Q0E671|NEUAA_DANRE N-acylneuraminate cytidylyltransferase A OS=Danio rerio OX=7955 GN=cmasa PE=1 SV=1	48227	17	cmasa
tr|E9QH73|E9QH73_DANRE	0.225708	1.16935	0.305252	tr|E9QH73|E9QH73_DANRE FERM domain-containing 4Bb (Fragment) OS=Danio rerio OX=7955 GN=frmd4bb PE=4 SV=1	106575	2	frmd4bb
tr|E7FGF1|E7FGF1_DANRE	0.225596	1.16926	0.186039	tr|E7FGF1|E7FGF1_DANRE G protein-coupled receptor 158b OS=Danio rerio OX=7955 GN=gpr158b PE=3 SV=1	144657	14	gpr158b
sp|A2BGU9|SERHL_DANRE	0.225579	1.16925	0.362104	sp|A2BGU9|SERHL_DANRE Serine hydrolase-like protein OS=Danio rerio OX=7955 GN=serhl PE=2 SV=1	37106	6	serhl
tr|C0SU61|C0SU61_DANRE	0.225577	1.16924	0.256174	tr|C0SU61|C0SU61_DANRE Tuberin-like protein 1 splicing variant1 OS=Danio rerio OX=7955 GN=ralgapa1 PE=2 SV=1	232481	2	ralgapa1
tr|Q6PE45|Q6PE45_DANRE	0.225444	1.16914	0.306239	tr|Q6PE45|Q6PE45_DANRE Protein RER1 OS=Danio rerio OX=7955 GN=rer1 PE=1 SV=1	22754	4	rer1
tr|B8A6I4|B8A6I4_DANRE	0.225389	1.16909	0.607791	tr|B8A6I4|B8A6I4_DANRE Family with sequence similarity 160 member B1 OS=Danio rerio OX=7955 GN=fhip2a PE=1 SV=1	84535	5	fhip2a
tr|A0A2R8PZA4|A0A2R8PZA4_DANRE	0.225229	1.16896	0.190153	tr|A0A2R8PZA4|A0A2R8PZA4_DANRE Nucleophosmin OS=Danio rerio OX=7955 GN=npm1b PE=1 SV=1	32901	8	npm1b
tr|A0A0R4IT43|A0A0R4IT43_DANRE	0.225221	1.16896	0.289299	tr|A0A0R4IT43|A0A0R4IT43_DANRE Dedicator of cytokinesis 4b OS=Danio rerio OX=7955 GN=dock4b PE=1 SV=1	225374	19	dock4b
tr|F2Z4R5|F2Z4R5_DANRE	0.225191	1.16893	0.596731	tr|F2Z4R5|F2Z4R5_DANRE Transmembrane protein 163 OS=Danio rerio OX=7955 GN=tmem163b PE=3 SV=1	30760	1	tmem163b
tr|A7MBR1|A7MBR1_DANRE	0.225063	1.16883	0.148976	tr|A7MBR1|A7MBR1_DANRE Sept2 protein (Fragment) OS=Danio rerio OX=7955 GN=sept2 PE=2 SV=1	46922	10	sept2
tr|A0A0R4IUB6|A0A0R4IUB6_DANRE	0.224959	1.16874	0.582736	tr|A0A0R4IUB6|A0A0R4IUB6_DANRE Epsin 1 OS=Danio rerio OX=7955 GN=epn1a PE=1 SV=2	67149	7	epn1a
tr|Q4V8S5|Q4V8S5_DANRE	0.22444	1.16832	0.476424	tr|Q4V8S5|Q4V8S5_DANRE Acbd7 protein OS=Danio rerio OX=7955 GN=acbd7 PE=1 SV=1	10019	8	acbd7
tr|F1QPU0|F1QPU0_DANRE	0.224363	1.16826	0.4787	tr|F1QPU0|F1QPU0_DANRE Sorting nexin 24 OS=Danio rerio OX=7955 GN=snx24 PE=4 SV=1	20098	4	snx24
tr|A0A2R8Q3N3|A0A2R8Q3N3_DANRE	0.224151	1.16809	0.598658	tr|A0A2R8Q3N3|A0A2R8Q3N3_DANRE Rho/rac guanine nucleotide exchange factor (GEF) 2 OS=Danio rerio OX=7955 GN=arhgef2 PE=1 SV=1	102624	1	arhgef2
tr|A0A0R4IH40|A0A0R4IH40_DANRE	0.224028	1.16799	0.487774	tr|A0A0R4IH40|A0A0R4IH40_DANRE Gamma-aminobutyric acid type A receptor subunit zeta OS=Danio rerio OX=7955 GN=gabrz PE=3 SV=1	50895	3	gabrz
tr|X1WDZ1|X1WDZ1_DANRE	0.223954	1.16793	0.187695	tr|X1WDZ1|X1WDZ1_DANRE Calsyntenin 3 OS=Danio rerio OX=7955 GN=clstn3 PE=4 SV=2	105444	6	clstn3
tr|Q5SPJ1|Q5SPJ1_DANRE	0.223891	1.16788	0.375955	tr|Q5SPJ1|Q5SPJ1_DANRE Serine (or cysteine) proteinase inhibitor, clade A (alpha-1 antiproteinase, antitrypsin), member 1,-like OS=Danio rerio OX=7955 GN=serpina1l PE=1 SV=1	47820	5	serpina1l
tr|F1Q6B4|F1Q6B4_DANRE	0.223829	1.16783	0.498603	tr|F1Q6B4|F1Q6B4_DANRE Thioredoxin-related transmembrane protein 1 OS=Danio rerio OX=7955 GN=tmx1 PE=1 SV=1	32338	3	tmx1
tr|F1R182|F1R182_DANRE	0.223448	1.16752	0.0628868	tr|F1R182|F1R182_DANRE Aminoacyl tRNA synthase complex-interacting multifunctional protein 2 OS=Danio rerio OX=7955 GN=aimp2 PE=1 SV=1	34834	5	aimp2
tr|F1Q6B2|F1Q6B2_DANRE	0.223421	1.1675	0.428787	tr|F1Q6B2|F1Q6B2_DANRE Aminoacyl-tRNA hydrolase OS=Danio rerio OX=7955 GN=ptrh2 PE=1 SV=1	18634	4	ptrh2
tr|Q4KMD9|Q4KMD9_DANRE	0.223171	1.1673	0.667556	tr|Q4KMD9|Q4KMD9_DANRE ElaC homolog protein 2 (Fragment) OS=Danio rerio OX=7955 GN=elac2 PE=2 SV=1	91392	11	elac2
tr|A0A2R8RW70|A0A2R8RW70_DANRE	0.223156	1.16728	0.324651	tr|A0A2R8RW70|A0A2R8RW70_DANRE Dipeptidyl-peptidase 6b OS=Danio rerio OX=7955 GN=dpp6b PE=4 SV=1	89596	7	dpp6b
tr|F1Q5R8|F1Q5R8_DANRE	0.223073	1.16722	0.569361	tr|F1Q5R8|F1Q5R8_DANRE Aldehyde oxidase 6 OS=Danio rerio OX=7955 GN=aox6 PE=1 SV=3	147557	20	aox6
tr|A0A2R8QJA0|A0A2R8QJA0_DANRE	0.222575	1.16681	0.11876	tr|A0A2R8QJA0|A0A2R8QJA0_DANRE Acetyl-CoA carboxylase OS=Danio rerio OX=7955 GN=acaca PE=1 SV=1	267471	56	acaca
tr|A9JR96|A9JR96_DANRE	0.222313	1.1666	0.623189	tr|A9JR96|A9JR96_DANRE WD repeat domain 43 OS=Danio rerio OX=7955 GN=wdr43 PE=1 SV=1	71629	3	wdr43
tr|F1QXP5|F1QXP5_DANRE	0.222142	1.16646	0.294339	tr|F1QXP5|F1QXP5_DANRE C-1-tetrahydrofolate synthase, cytoplasmic OS=Danio rerio OX=7955 GN=mthfd1b PE=1 SV=1	100521	2	mthfd1b
tr|E9QJA6|E9QJA6_DANRE	0.221965	1.16632	0.251409	tr|E9QJA6|E9QJA6_DANRE Family with sequence similarity 114 member A2 OS=Danio rerio OX=7955 GN=fam114a2 PE=1 SV=2	56951	8	fam114a2
sp|A0A0R4IKJ1|CAPAM_DANRE	0.221834	1.16621	0.343363	sp|A0A0R4IKJ1|CAPAM_DANRE mRNA (2'-O-methyladenosine-N(6)-)-methyltransferase OS=Danio rerio OX=7955 GN=pcif1 PE=1 SV=1	81297	11	pcif1
tr|B8A6G7|B8A6G7_DANRE	0.221828	1.16621	0.751317	tr|B8A6G7|B8A6G7_DANRE ATP synthase subunit s, mitochondrial OS=Danio rerio OX=7955 GN=dmac2l PE=1 SV=1	19227	6	dmac2l
tr|Q6PBT3|Q6PBT3_DANRE	0.221729	1.16613	0.561015	tr|Q6PBT3|Q6PBT3_DANRE Fasciculation and Elongation protein zeta 1 (Zygin I) OS=Danio rerio OX=7955 GN=fez1 PE=2 SV=1	45119	6	fez1
tr|E7FFJ7|E7FFJ7_DANRE	0.221578	1.16601	0.340581	tr|E7FFJ7|E7FFJ7_DANRE Glutathione hydrolase OS=Danio rerio OX=7955 GN=ggt5b PE=1 SV=1	60129	16	ggt5b
tr|Q7ZUS7|Q7ZUS7_DANRE	0.221319	1.1658	0.421397	tr|Q7ZUS7|Q7ZUS7_DANRE Serine/threonine-protein phosphatase OS=Danio rerio OX=7955 GN=ppp6c PE=1 SV=1	35159	12	ppp6c
tr|E7F577|E7F577_DANRE	0.221311	1.16579	0.791413	tr|E7F577|E7F577_DANRE Diacylglycerol kinase OS=Danio rerio OX=7955 GN=dgki PE=3 SV=2	82140	7	dgki
tr|F1R6L2|F1R6L2_DANRE	0.221142	1.16566	0.218612	tr|F1R6L2|F1R6L2_DANRE Huntingtin-interacting protein 1 OS=Danio rerio OX=7955 GN=hip1 PE=1 SV=3	116293	29	hip1
tr|A0A0R4IAD5|A0A0R4IAD5_DANRE	0.221009	1.16555	0.294321	tr|A0A0R4IAD5|A0A0R4IAD5_DANRE NDRG family member 4 (Fragment) OS=Danio rerio OX=7955 GN=ndrg4 PE=1 SV=1	28117	3	ndrg4
tr|A0A2R8RVQ2|A0A2R8RVQ2_DANRE	0.220952	1.1655	0.431476	tr|A0A2R8RVQ2|A0A2R8RVQ2_DANRE Phospholipid phosphatase-related 4b OS=Danio rerio OX=7955 GN=plppr4b PE=3 SV=1	80446	4	plppr4b
tr|A5WV48|A5WV48_DANRE	0.220528	1.16516	0.519192	tr|A5WV48|A5WV48_DANRE Arylsulfatase A OS=Danio rerio OX=7955 GN=arsa PE=1 SV=1	55126	8	arsa
sp|Q1LVW0|BTBBA_DANRE	0.220494	1.16513	0.490229	sp|Q1LVW0|BTBBA_DANRE Ankyrin repeat and BTB/POZ domain-containing protein BTBD11-A OS=Danio rerio OX=7955 GN=btbd11a PE=3 SV=2	113811	6	btbd11a
tr|B0R1D0|B0R1D0_DANRE	0.220383	1.16504	0.124223	tr|B0R1D0|B0R1D0_DANRE 26S proteasome AAA-ATPase subunit RPT3 OS=Danio rerio OX=7955 GN=psmc4 PE=1 SV=1	47260	25	psmc4
sp|Q9MIY9|NU2M_DANRE	0.220279	1.16496	0.350976	sp|Q9MIY9|NU2M_DANRE NADH-ubiquinone oxidoreductase chain 2 OS=Danio rerio OX=7955 GN=mt-nd2 PE=3 SV=1	37721	2	mt-nd2
tr|F1QF69|F1QF69_DANRE	0.220218	1.16491	0.463748	tr|F1QF69|F1QF69_DANRE Heme-binding protein soul5 OS=Danio rerio OX=7955 GN=soul5 PE=3 SV=2	24181	7	soul5
tr|E7FEE4|E7FEE4_DANRE	0.219967	1.16471	0.346872	tr|E7FEE4|E7FEE4_DANRE WD repeat domain 37 OS=Danio rerio OX=7955 GN=wdr37 PE=1 SV=1	54842	18	wdr37
tr|A0A0R4IM10|A0A0R4IM10_DANRE	0.219474	1.16431	0.290898	tr|A0A0R4IM10|A0A0R4IM10_DANRE Abraxas 2, BRISC complex subunit (Fragment) OS=Danio rerio OX=7955 GN=abraxas2 PE=1 SV=1	47067	1	abraxas2
tr|B8A6H6|B8A6H6_DANRE	0.219468	1.1643	0.465403	tr|B8A6H6|B8A6H6_DANRE Nucleolar autoantigen 36 (Fragment) OS=Danio rerio OX=7955 GN=znf330 PE=3 SV=1	25436	2	znf330
tr|F1Q749|F1Q749_DANRE	0.219179	1.16407	0.503989	tr|F1Q749|F1Q749_DANRE Dyskeratosis congenita 1, dyskerin OS=Danio rerio OX=7955 GN=dkc1 PE=1 SV=1	56676	9	dkc1
tr|B3DKQ5|B3DKQ5_DANRE	0.219175	1.16407	0.25832	tr|B3DKQ5|B3DKQ5_DANRE Reticulon OS=Danio rerio OX=7955 GN=rtn1a PE=2 SV=1	89083	3	rtn1a
tr|A0A0G2L6G5|A0A0G2L6G5_DANRE	0.218857	1.16381	0.545583	tr|A0A0G2L6G5|A0A0G2L6G5_DANRE Contactin-1a OS=Danio rerio OX=7955 GN=cntn1a PE=4 SV=2	21812	1	cntn1a
tr|Q5U3R3|Q5U3R3_DANRE	0.218709	1.16369	0.550166	tr|Q5U3R3|Q5U3R3_DANRE Protein tyrosine phosphatase 4A2b OS=Danio rerio OX=7955 GN=ptp4a2b PE=1 SV=1	19969	6	ptp4a2b
tr|A0A2R8Q6M5|A0A2R8Q6M5_DANRE	0.218476	1.1635	0.356842	tr|A0A2R8Q6M5|A0A2R8Q6M5_DANRE Selenoprotein W, 2a OS=Danio rerio OX=7955 GN=selenow2a PE=1 SV=1	9511	2	selenow2a
tr|A0A0R4IF18|A0A0R4IF18_DANRE	0.218367	1.16342	0.137951	tr|A0A0R4IF18|A0A0R4IF18_DANRE ARVCF delta catenin family member b OS=Danio rerio OX=7955 GN=arvcfb PE=1 SV=1	108390	20	arvcfb
tr|Q6P0H3|Q6P0H3_DANRE	0.218306	1.16337	0.281566	tr|Q6P0H3|Q6P0H3_DANRE Purine nucleoside phosphorylase OS=Danio rerio OX=7955 GN=pnp6 PE=2 SV=1	31840	16	pnp6
tr|Q6DHM3|Q6DHM3_DANRE	0.217944	1.16308	0.319796	tr|Q6DHM3|Q6DHM3_DANRE Crystallin, zeta (Quinone reductase)-like 1 OS=Danio rerio OX=7955 GN=cryzl1 PE=1 SV=1	38498	8	cryzl1
tr|A0A0H2UKK7|A0A0H2UKK7_DANRE	0.217207	1.16248	0.609722	tr|A0A0H2UKK7|A0A0H2UKK7_DANRE Nucleoporin 214 OS=Danio rerio OX=7955 GN=nup214 PE=1 SV=1	127008	9	nup214
tr|F1R953|F1R953_DANRE	0.216811	1.16216	0.704541	tr|F1R953|F1R953_DANRE ARVCF delta catenin family member a OS=Danio rerio OX=7955 GN=arvcfa PE=3 SV=2	90121	8	arvcfa
tr|Q6NY22|Q6NY22_DANRE	0.216796	1.16215	0.287035	tr|Q6NY22|Q6NY22_DANRE Txndc4 protein (Fragment) OS=Danio rerio OX=7955 GN=erp44 PE=2 SV=1	50994	15	erp44
tr|B0R197|B0R197_DANRE	0.216551	1.16195	0.33169	tr|B0R197|B0R197_DANRE Voltage-dependent anion-selective channel protein 3 OS=Danio rerio OX=7955 GN=vdac3 PE=1 SV=1	33943	0	vdac3
sp|Q6PBN2|AIDA_DANRE	0.216501	1.16191	0.378574	sp|Q6PBN2|AIDA_DANRE Axin interactor, dorsalization-associated protein OS=Danio rerio OX=7955 GN=aida PE=1 SV=1	34560	9	aida
tr|A1XQX6|A1XQX6_DANRE	0.216478	1.16189	0.143908	tr|A1XQX6|A1XQX6_DANRE Neurexin 2b alpha OS=Danio rerio OX=7955 GN=nrxn2b PE=2 SV=1	174044	11	nrxn2b
tr|B2GT67|B2GT67_DANRE	0.216154	1.16163	0.291635	tr|B2GT67|B2GT67_DANRE Abcg2c protein OS=Danio rerio OX=7955 GN=abcg2c PE=2 SV=1	71256	4	abcg2c
tr|A0A2R8QK55|A0A2R8QK55_DANRE	0.216148	1.16163	0.404515	tr|A0A2R8QK55|A0A2R8QK55_DANRE Transmembrane protein 14Ca OS=Danio rerio OX=7955 GN=tmem14ca PE=1 SV=1	10694	2	tmem14ca
tr|A0A0R4IMX5|A0A0R4IMX5_DANRE	0.215658	1.16123	0.273914	tr|A0A0R4IMX5|A0A0R4IMX5_DANRE Ribose-5-phosphate isomerase OS=Danio rerio OX=7955 GN=rpia PE=1 SV=2	30716	5	rpia
tr|F1QTS9|F1QTS9_DANRE	0.215633	1.16121	0.406188	tr|F1QTS9|F1QTS9_DANRE Ribosome assembly factor mrt4 OS=Danio rerio OX=7955 GN=mrto4 PE=1 SV=1	27736	4	mrto4
tr|E7EY10|E7EY10_DANRE	0.215597	1.16118	0.362734	tr|E7EY10|E7EY10_DANRE Calcium channel, voltage-dependent, gamma subunit 3b OS=Danio rerio OX=7955 GN=cacng3b PE=3 SV=1	34332	3	cacng3b
tr|A0A140LH42|A0A140LH42_DANRE	0.215575	1.16117	0.117277	tr|A0A140LH42|A0A140LH42_DANRE Rabphilin 3A homolog (mouse), b OS=Danio rerio OX=7955 GN=rph3ab PE=4 SV=1	65216	21	rph3ab
sp|A9JTH1|NCLDA_DANRE	0.215471	1.16108	0.198731	sp|A9JTH1|NCLDA_DANRE Neurocalcin-delta A OS=Danio rerio OX=7955 GN=ncalda PE=2 SV=1	22224	5	ncalda
tr|A0A286Y9X1|A0A286Y9X1_DANRE	0.215398	1.16102	0.3318	tr|A0A286Y9X1|A0A286Y9X1_DANRE Golgi brefeldin A-resistant guanine nucleotide exchange factor 1 OS=Danio rerio OX=7955 GN=gbf1 PE=1 SV=2	207777	21	gbf1
tr|Q6IQH4|Q6IQH4_DANRE	0.215273	1.16092	0.145955	tr|Q6IQH4|Q6IQH4_DANRE 26S proteasome non-ATPase regulatory subunit 8 OS=Danio rerio OX=7955 GN=psmd8 PE=1 SV=1	31015	14	psmd8
tr|F1R184|F1R184_DANRE	0.214498	1.1603	0.206819	tr|F1R184|F1R184_DANRE Thioredoxin domain-containing 5 OS=Danio rerio OX=7955 GN=txndc5 PE=1 SV=1	46159	3	txndc5
tr|F1R254|F1R254_DANRE	0.214464	1.16027	0.450946	tr|F1R254|F1R254_DANRE ArfGAP with GTPase domain, ankyrin repeat and PH domain 2 OS=Danio rerio OX=7955 GN=agap2 PE=3 SV=1	90505	11	agap2
tr|A0A0R4IR15|A0A0R4IR15_DANRE	0.214326	1.16016	0.44428	tr|A0A0R4IR15|A0A0R4IR15_DANRE RAB3A-interacting protein (rabin3) OS=Danio rerio OX=7955 GN=rab3ip PE=3 SV=2	47736	9	rab3ip
tr|A0A0R4IGD5|A0A0R4IGD5_DANRE	0.214258	1.16011	0.537311	tr|A0A0R4IGD5|A0A0R4IGD5_DANRE Si:ch211-79l17.1 OS=Danio rerio OX=7955 GN=si:ch211-79l17.1 PE=1 SV=1	116052	4	si:ch211-79l17.1
tr|A7YYE5|A7YYE5_DANRE	0.214048	1.15994	0.677961	tr|A7YYE5|A7YYE5_DANRE CKLF-like MARVEL transmembrane domain-containing 4 OS=Danio rerio OX=7955 GN=cmtm4 PE=2 SV=1	23219	1	cmtm4
sp|Q5PRA2|DHTK1_DANRE	0.213963	1.15987	0.214594	sp|Q5PRA2|DHTK1_DANRE Probable 2-oxoglutarate dehydrogenase E1 component DHKTD1, mitochondrial OS=Danio rerio OX=7955 GN=dhtkd1 PE=2 SV=2	102964	21	dhtkd1
sp|A1A5H6|CNOT1_DANRE	0.213943	1.15985	0.348738	sp|A1A5H6|CNOT1_DANRE CCR4-NOT transcription complex subunit 1 OS=Danio rerio OX=7955 GN=cnot1 PE=2 SV=1	266604	51	cnot1
tr|F1Q5S2|F1Q5S2_DANRE	0.213505	1.1595	0.240852	tr|F1Q5S2|F1Q5S2_DANRE Protein Z, vitamin K-dependent plasma glycoprotein a OS=Danio rerio OX=7955 GN=proza PE=4 SV=1	47249	20	proza
tr|Q5TZ05|Q5TZ05_DANRE	0.212999	1.1591	0.549895	tr|Q5TZ05|Q5TZ05_DANRE Peptide-methionine (S)-S-oxide reductase OS=Danio rerio OX=7955 GN=msra PE=1 SV=1	26625	7	msra
tr|A0A0R4IYD3|A0A0R4IYD3_DANRE	0.212776	1.15892	0.542564	tr|A0A0R4IYD3|A0A0R4IYD3_DANRE WD repeat domain 47b OS=Danio rerio OX=7955 GN=wdr47b PE=1 SV=1	95658	8	wdr47b
tr|F8W2R4|F8W2R4_DANRE	0.212738	1.15889	0.560061	tr|F8W2R4|F8W2R4_DANRE Hepatic and glial cell adhesion molecule a (Fragment) OS=Danio rerio OX=7955 GN=hepacama PE=4 SV=1	49666	2	hepacama
tr|F1QTB5|F1QTB5_DANRE	0.212656	1.15882	0.129431	tr|F1QTB5|F1QTB5_DANRE Dolichyl-diphosphooligosaccharide--protein glycosyltransferase subunit 1 OS=Danio rerio OX=7955 GN=rpn1 PE=1 SV=1	67658	4	rpn1
tr|A0A2R8QRZ7|A0A2R8QRZ7_DANRE	0.212606	1.15878	0.522584	tr|A0A2R8QRZ7|A0A2R8QRZ7_DANRE BK channel OS=Danio rerio OX=7955 GN=kcnma1a PE=3 SV=1	137993	12	kcnma1a
tr|A0A0G2KFS5|A0A0G2KFS5_DANRE	0.211888	1.1582	0.332404	tr|A0A0G2KFS5|A0A0G2KFS5_DANRE Armadillo repeat containing 6 OS=Danio rerio OX=7955 GN=armc6 PE=1 SV=2	52170	17	armc6
tr|F1QHJ1|F1QHJ1_DANRE	0.211831	1.15816	0.594373	tr|F1QHJ1|F1QHJ1_DANRE 40S ribosomal protein S26 OS=Danio rerio OX=7955 GN=rps26l PE=3 SV=1	13021	3	rps26l
tr|A0A2R8QCG3|A0A2R8QCG3_DANRE	0.211809	1.15814	0.315636	tr|A0A2R8QCG3|A0A2R8QCG3_DANRE Tripartite motif-containing 2b OS=Danio rerio OX=7955 GN=trim2b PE=3 SV=1	68795	14	trim2b
tr|Q6DG67|Q6DG67_DANRE	0.211772	1.15811	0.121891	tr|Q6DG67|Q6DG67_DANRE ATP-citrate synthase OS=Danio rerio OX=7955 GN=aclya PE=2 SV=1	119710	1	aclya
sp|A9JRZ0|SMUF2_DANRE	0.211565	1.15794	0.254935	sp|A9JRZ0|SMUF2_DANRE E3 ubiquitin-protein ligase SMURF2 OS=Danio rerio OX=7955 GN=smurf2 PE=2 SV=1	87464	9	smurf2
tr|A2RV38|A2RV38_DANRE	0.211498	1.15789	0.161365	tr|A2RV38|A2RV38_DANRE RNA helicase OS=Danio rerio OX=7955 GN=ddx3xa PE=2 SV=1	78395	10	ddx3xa
tr|A0A0R4INZ8|A0A0R4INZ8_DANRE	0.211262	1.1577	0.289835	tr|A0A0R4INZ8|A0A0R4INZ8_DANRE Dihydrolipoamide acetyltransferase component of pyruvate dehydrogenase complex (Fragment) OS=Danio rerio OX=7955 GN=dbt PE=1 SV=1	58448	14	dbt
sp|L7VG99|T132E_DANRE	0.21099	1.15748	0.639908	sp|L7VG99|T132E_DANRE Transmembrane protein 132E OS=Danio rerio OX=7955 GN=tmem132e PE=2 SV=1	119140	7	tmem132e
tr|E9QDE9|E9QDE9_DANRE	0.210932	1.15744	0.408909	tr|E9QDE9|E9QDE9_DANRE RAB GTPase-activating protein 1-like OS=Danio rerio OX=7955 GN=rabgap1l PE=1 SV=2	115617	13	rabgap1l
tr|B0S739|B0S739_DANRE	0.210849	1.15737	0.614764	tr|B0S739|B0S739_DANRE Si:dkey-4e7.3 OS=Danio rerio OX=7955 GN=si:dkey-4e7.3 PE=1 SV=1	34565	7	si:dkey-4e7.3
sp|Q504A5|TPMT_DANRE	0.210816	1.15734	0.384959	sp|Q504A5|TPMT_DANRE Probable thiopurine S-methyltransferase OS=Danio rerio OX=7955 GN=tpmt PE=2 SV=1	26334	11	tpmt
tr|A3KQW9|A3KQW9_DANRE	0.210675	1.15723	0.626014	tr|A3KQW9|A3KQW9_DANRE ADNP homeobox 2b OS=Danio rerio OX=7955 GN=adnp2b PE=1 SV=1	106028	7	adnp2b
tr|B0CM07|B0CM07_DANRE	0.210666	1.15722	0.409888	tr|B0CM07|B0CM07_DANRE Zgc:112341 (Fragment) OS=Danio rerio OX=7955 GN=igsf21a PE=2 SV=1	53413	6	igsf21a
tr|Q90Z98|Q90Z98_DANRE	0.210637	1.1572	0.43293	tr|Q90Z98|Q90Z98_DANRE BCL2-like 1 OS=Danio rerio OX=7955 GN=bcl2l1 PE=1 SV=1	26253	6	bcl2l1
tr|X1WED4|X1WED4_DANRE	0.210627	1.15719	0.348954	tr|X1WED4|X1WED4_DANRE Solute carrier family 12 member 5a OS=Danio rerio OX=7955 GN=slc12a5a PE=1 SV=1	119434	1	slc12a5a
tr|A0A0R4IFJ1|A0A0R4IFJ1_DANRE	0.210591	1.15716	0.193722	tr|A0A0R4IFJ1|A0A0R4IFJ1_DANRE DnaJ (Hsp40) homolog, subfamily C, member 7 OS=Danio rerio OX=7955 GN=dnajc7 PE=1 SV=2	59580	24	dnajc7
tr|Q9YH60|Q9YH60_DANRE	0.210487	1.15708	0.321133	tr|Q9YH60|Q9YH60_DANRE Glycogen synthase kinase-3 beta OS=Danio rerio OX=7955 GN=gsk3ba PE=1 SV=1	46872	11	gsk3ba
tr|A0A0R4I9A3|A0A0R4I9A3_DANRE	0.21013	1.15679	0.439144	tr|A0A0R4I9A3|A0A0R4I9A3_DANRE Protein BUD31 homolog OS=Danio rerio OX=7955 GN=bud31 PE=1 SV=1	17038	6	bud31
tr|F1QAI9|F1QAI9_DANRE	0.209884	1.1566	0.72381	tr|F1QAI9|F1QAI9_DANRE Si:ch211-132g1.7 OS=Danio rerio OX=7955 GN=si:ch211-132g1.7 PE=4 SV=2	94536	7	si:ch211-132g1.7
tr|F1QFL1|F1QFL1_DANRE	0.20985	1.15657	0.223885	tr|F1QFL1|F1QFL1_DANRE Methionine--tRNA ligase, cytoplasmic OS=Danio rerio OX=7955 GN=mars1 PE=1 SV=1	106758	2	mars1
tr|A0A0R4ILM1|A0A0R4ILM1_DANRE	0.209681	1.15643	0.544658	tr|A0A0R4ILM1|A0A0R4ILM1_DANRE Abhydrolase domain-containing 10, depalmitoylase a OS=Danio rerio OX=7955 GN=abhd10a PE=1 SV=1	31639	10	abhd10a
tr|B7ZD32|B7ZD32_DANRE	0.209573	1.15635	0.317566	tr|B7ZD32|B7ZD32_DANRE 40S ribosomal protein S24 OS=Danio rerio OX=7955 GN=rps24 PE=1 SV=1	13766	6	rps24
tr|E7FC94|E7FC94_DANRE	0.209306	1.15613	0.341357	tr|E7FC94|E7FC94_DANRE Si:ch211-200p22.4 OS=Danio rerio OX=7955 GN=si:ch211-200p22.4 PE=1 SV=3	35757	2	si:ch211-200p22.4
tr|A2BE49|A2BE49_DANRE	0.209296	1.15612	0.47809	tr|A2BE49|A2BE49_DANRE Protein phosphatase, Mg2+/Mn2+-dependent, 1F OS=Danio rerio OX=7955 GN=ppm1f PE=1 SV=1	46232	2	ppm1f
tr|Q3S344|Q3S344_DANRE	0.209246	1.15608	0.188539	tr|Q3S344|Q3S344_DANRE Glutamine--fructose-6-phosphate transaminase (isomerizing) OS=Danio rerio OX=7955 GN=gfpt1 PE=1 SV=1	76722	28	gfpt1
tr|A0A2R8Q7D0|A0A2R8Q7D0_DANRE	0.209034	1.15591	0.0890855	tr|A0A2R8Q7D0|A0A2R8Q7D0_DANRE Coagulation factor III OS=Danio rerio OX=7955 GN=f3a PE=3 SV=1	33197	9	f3a
tr|A8E7E7|A8E7E7_DANRE	0.208936	1.15584	0.125357	tr|A8E7E7|A8E7E7_DANRE Intersectin 1 (SH3 domain protein) OS=Danio rerio OX=7955 GN=itsn1 PE=1 SV=2	194034	5	itsn1
tr|A0A2R9YJN4|A0A2R9YJN4_DANRE	0.208898	1.1558	0.208559	tr|A0A2R9YJN4|A0A2R9YJN4_DANRE Embigin OS=Danio rerio OX=7955 GN=emb PE=4 SV=1	36357	5	emb
sp|Q66L49|SCMC1_DANRE	0.208778	1.15571	0.447412	sp|Q66L49|SCMC1_DANRE Calcium-binding mitochondrial carrier protein SCaMC-1 OS=Danio rerio OX=7955 GN=slc25a24 PE=2 SV=1	53356	11	slc25a24
tr|A0A2R8Q853|A0A2R8Q853_DANRE	0.208536	1.15551	0.106501	tr|A0A2R8Q853|A0A2R8Q853_DANRE Solute carrier family 2 member 1b OS=Danio rerio OX=7955 GN=slc2a1b PE=3 SV=1	50895	4	slc2a1b
tr|A0A2R8QE54|A0A2R8QE54_DANRE	0.208491	1.15548	0.435721	tr|A0A2R8QE54|A0A2R8QE54_DANRE Si:dkey-82j4.2 OS=Danio rerio OX=7955 GN=si:dkey-82j4.2 PE=1 SV=1	114566	17	si:dkey-82j4.2
tr|A0A0A1GU50|A0A0A1GU50_DANRE	0.208297	1.15532	0.65459	tr|A0A0A1GU50|A0A0A1GU50_DANRE Non-specific serine/threonine protein kinase OS=Danio rerio OX=7955 GN=araf PE=2 SV=1	68247	4	araf
sp|Q6NY88|CHMP3_DANRE	0.208188	1.15524	0.36689	sp|Q6NY88|CHMP3_DANRE Charged multivesicular body protein 3 OS=Danio rerio OX=7955 GN=chmp3 PE=2 SV=3	24807	4	chmp3
tr|A0A0R4IJ49|A0A0R4IJ49_DANRE	0.208082	1.15515	0.154976	tr|A0A0R4IJ49|A0A0R4IJ49_DANRE 40S ribosomal protein S19 OS=Danio rerio OX=7955 GN=rps19 PE=1 SV=1	16731	10	rps19
tr|A0A0R4IHE5|A0A0R4IHE5_DANRE	0.207765	1.1549	0.134806	tr|A0A0R4IHE5|A0A0R4IHE5_DANRE Family with sequence similarity 49 member A,-like OS=Danio rerio OX=7955 GN=fam49al PE=1 SV=1	36833	10	fam49al
tr|A0A2R8Q3H9|A0A2R8Q3H9_DANRE	0.207715	1.15486	0.434589	tr|A0A2R8Q3H9|A0A2R8Q3H9_DANRE Adhesion G protein-coupled receptor L1a OS=Danio rerio OX=7955 GN=adgrl1a PE=4 SV=1	169202	17	adgrl1a
tr|Q498W6|Q498W6_DANRE	0.207391	1.1546	0.426946	tr|Q498W6|Q498W6_DANRE NADH dehydrogenase [ubiquinone] 1 alpha subcomplex subunit 12 OS=Danio rerio OX=7955 GN=ndufa12 PE=1 SV=1	16969	9	ndufa12
tr|Q5RIK6|Q5RIK6_DANRE	0.207354	1.15457	0.647832	tr|Q5RIK6|Q5RIK6_DANRE SEL1L adaptor subunit of ERAD E3 ubiquitin ligase OS=Danio rerio OX=7955 GN=sel1l PE=1 SV=1	85860	6	sel1l
tr|Q6P018|Q6P018_DANRE	0.207064	1.15434	0.234941	tr|Q6P018|Q6P018_DANRE Testis-expressed 264, ER-phagy receptor a OS=Danio rerio OX=7955 GN=tex264a PE=2 SV=1	35701	10	tex264a
tr|F1QDM5|F1QDM5_DANRE	0.206659	1.15401	0.550814	tr|F1QDM5|F1QDM5_DANRE Mitochondrial ribosomal protein S11 OS=Danio rerio OX=7955 GN=mrps11 PE=1 SV=3	23868	4	mrps11
sp|Q6IQE5|GET3_DANRE	0.206145	1.1536	0.246	sp|Q6IQE5|GET3_DANRE ATPase GET3 OS=Danio rerio OX=7955 GN=get3 PE=1 SV=1	38339	13	get3
tr|F1QXK8|F1QXK8_DANRE	0.205768	1.1533	0.581954	tr|F1QXK8|F1QXK8_DANRE Protein phosphatase 4, regulatory subunit 4 OS=Danio rerio OX=7955 GN=ppp4r4 PE=4 SV=2	98059	13	ppp4r4
tr|Q4QRE2|Q4QRE2_DANRE	0.205648	1.1532	0.139786	tr|Q4QRE2|Q4QRE2_DANRE Acyl-coenzyme A oxidase OS=Danio rerio OX=7955 GN=acox1 PE=2 SV=1	74039	0	acox1
tr|A0A2R8QDI1|A0A2R8QDI1_DANRE	0.205549	1.15312	0.533191	tr|A0A2R8QDI1|A0A2R8QDI1_DANRE BCL2-associated athanogene 6 OS=Danio rerio OX=7955 GN=bag6 PE=1 SV=1	127271	11	bag6
tr|E7FAY2|E7FAY2_DANRE	0.20539	1.153	0.384765	tr|E7FAY2|E7FAY2_DANRE Regulator of microtubule dynamics 2 OS=Danio rerio OX=7955 GN=rmdn2 PE=1 SV=2	26663	5	rmdn2
sp|Q8UVK2|SPT6H_DANRE	0.20506	1.15273	0.430807	sp|Q8UVK2|SPT6H_DANRE Transcription elongation factor SPT6 OS=Danio rerio OX=7955 GN=supt6h PE=1 SV=1	198167	31	supt6h
tr|A0A0R4IB91|A0A0R4IB91_DANRE	0.204992	1.15268	0.423965	tr|A0A0R4IB91|A0A0R4IB91_DANRE Stress-activated protein kinase JNK OS=Danio rerio OX=7955 GN=mapk10 PE=1 SV=1	49812	6	mapk10
tr|E7EYW2|E7EYW2_DANRE	0.204621	1.15238	0.273442	tr|E7EYW2|E7EYW2_DANRE Epsin 2 OS=Danio rerio OX=7955 GN=epn2 PE=1 SV=1	62622	11	epn2
tr|E9QIL2|E9QIL2_DANRE	0.204301	1.15213	0.348402	tr|E9QIL2|E9QIL2_DANRE Membrane-associated guanylate kinase, WW and PDZ domain-containing 3b OS=Danio rerio OX=7955 GN=magi3b PE=4 SV=2	122202	9	magi3b
tr|A1L2A2|A1L2A2_DANRE	0.204258	1.15209	0.203886	tr|A1L2A2|A1L2A2_DANRE Zgc:158737 OS=Danio rerio OX=7955 GN=csrp1b PE=2 SV=1	20158	10	csrp1b
tr|Q7ZW27|Q7ZW27_DANRE	0.20423	1.15207	0.121943	tr|Q7ZW27|Q7ZW27_DANRE Coatomer subunit delta OS=Danio rerio OX=7955 GN=arcn1a PE=1 SV=1	56758	10	arcn1a
tr|X1WCH5|X1WCH5_DANRE	0.203972	1.15187	0.654872	tr|X1WCH5|X1WCH5_DANRE Zinc finger protein 839 OS=Danio rerio OX=7955 GN=znf839 PE=1 SV=1	107268	11	znf839
tr|A0A0R4IR86|A0A0R4IR86_DANRE	0.203875	1.15179	0.747021	tr|A0A0R4IR86|A0A0R4IR86_DANRE DNA helicase OS=Danio rerio OX=7955 GN=chd2 PE=1 SV=1	206127	6	chd2
tr|B3DH78|B3DH78_DANRE	0.203814	1.15174	0.556095	tr|B3DH78|B3DH78_DANRE Calcium/calmodulin-dependent serine protein kinase a OS=Danio rerio OX=7955 GN=caska PE=1 SV=1	104633	2	caska
tr|Q6NWJ8|Q6NWJ8_DANRE	0.203059	1.15114	0.106824	tr|Q6NWJ8|Q6NWJ8_DANRE UTP--glucose-1-phosphate uridylyltransferase OS=Danio rerio OX=7955 GN=ugp2b PE=1 SV=1	55026	12	ugp2b
sp|Q92005|EF1A_DANRE	0.202955	1.15105	0.382739	sp|Q92005|EF1A_DANRE Elongation factor 1-alpha OS=Danio rerio OX=7955 GN=eef1a PE=2 SV=1	50048	5	eef1a
tr|Q1ED27|Q1ED27_DANRE	0.202907	1.15102	0.613756	tr|Q1ED27|Q1ED27_DANRE DnaJ (Hsp40) homolog, subfamily C, member 8 OS=Danio rerio OX=7955 GN=dnajc8 PE=1 SV=1	28987	4	dnajc8
sp|A0JME6|ISOC2_DANRE	0.202774	1.15091	0.318486	sp|A0JME6|ISOC2_DANRE Isochorismatase domain-containing protein 2 OS=Danio rerio OX=7955 GN=isoc2 PE=2 SV=1	21491	9	isoc2
tr|Q6NZW1|Q6NZW1_DANRE	0.202752	1.15089	0.455869	tr|Q6NZW1|Q6NZW1_DANRE Bromodomain containing 3b OS=Danio rerio OX=7955 GN=brd3b PE=2 SV=1	73200	1	brd3b
tr|E7F8G5|E7F8G5_DANRE	0.202532	1.15072	0.262893	tr|E7F8G5|E7F8G5_DANRE Rho GTPase-activating protein 35a OS=Danio rerio OX=7955 GN=arhgap35a PE=1 SV=1	173556	21	arhgap35a
tr|A5PMY1|A5PMY1_DANRE	0.202439	1.15064	0.257026	tr|A5PMY1|A5PMY1_DANRE Regulating synaptic membrane exocytosis 3 OS=Danio rerio OX=7955 GN=rims3 PE=4 SV=1	34104	14	rims3
tr|A3KPR4|A3KPR4_DANRE	0.202284	1.15052	0.588829	tr|A3KPR4|A3KPR4_DANRE Histone H4 OS=Danio rerio OX=7955 GN=hist1h4l PE=2 SV=1	11367	5	hist1h4l
sp|Q6P5L8|HSDL2_DANRE	0.20228	1.15052	0.330783	sp|Q6P5L8|HSDL2_DANRE Hydroxysteroid dehydrogenase-like protein 2 OS=Danio rerio OX=7955 GN=hsdl2 PE=2 SV=1	44421	27	hsdl2
tr|Q6P7Y0|Q6P7Y0_DANRE	0.202204	1.15045	0.459709	tr|Q6P7Y0|Q6P7Y0_DANRE Ubiquitin-conjugating enzyme E2, J1 OS=Danio rerio OX=7955 GN=ube2j1 PE=1 SV=1	34276	4	ube2j1
tr|Q6PC70|Q6PC70_DANRE	0.201841	1.15017	0.457356	tr|Q6PC70|Q6PC70_DANRE Retinol dehydrogenase 8 OS=Danio rerio OX=7955 GN=rdh8a PE=2 SV=1	35425	6	rdh8a
tr|F1RAK1|F1RAK1_DANRE	0.201633	1.15	0.450252	tr|F1RAK1|F1RAK1_DANRE Kinesin-like protein OS=Danio rerio OX=7955 GN=zgc:103670 PE=1 SV=2	82059	12	zgc:103670
tr|A0A2R8Q1Z0|A0A2R8Q1Z0_DANRE	0.20152	1.14991	0.63461	tr|A0A2R8Q1Z0|A0A2R8Q1Z0_DANRE Phosphoinositide phospholipase C OS=Danio rerio OX=7955 GN=plcl2 PE=4 SV=1	119987	11	plcl2
tr|A8BAW4|A8BAW4_DANRE	0.201504	1.1499	0.448598	tr|A8BAW4|A8BAW4_DANRE Adhesion molecule with Ig-like domain 1 (Fragment) OS=Danio rerio OX=7955 GN=amigo1 PE=2 SV=1	42007	3	amigo1
tr|Q6NYV2|Q6NYV2_DANRE	0.20113	1.1496	0.73881	tr|Q6NYV2|Q6NYV2_DANRE Growth hormone inducible transmembrane protein OS=Danio rerio OX=7955 GN=ghitm PE=2 SV=1	36040	3	ghitm
tr|Q6NYN3|Q6NYN3_DANRE	0.201023	1.14951	0.23401	tr|Q6NYN3|Q6NYN3_DANRE Importin 7 OS=Danio rerio OX=7955 GN=ipo7 PE=1 SV=1	119443	26	ipo7
sp|Q1LV19|SPKAP_DANRE	0.20089	1.14941	0.436412	sp|Q1LV19|SPKAP_DANRE A-kinase anchor protein SPHKAP OS=Danio rerio OX=7955 GN=sphkap PE=3 SV=1	174563	16	sphkap
sp|Q503C8|NUDC1_DANRE	0.200866	1.14939	0.737172	sp|Q503C8|NUDC1_DANRE NudC domain-containing protein 1 OS=Danio rerio OX=7955 GN=nudcd1 PE=2 SV=1	65790	8	nudcd1
tr|Q0P458|Q0P458_DANRE	0.20076	1.1493	0.330153	tr|Q0P458|Q0P458_DANRE RAB9A, member RAS oncogene family OS=Danio rerio OX=7955 GN=rab9a PE=1 SV=1	22871	3	rab9a
tr|E7FGB9|E7FGB9_DANRE	0.200474	1.14908	0.693511	tr|E7FGB9|E7FGB9_DANRE Si:ch73-173p19.1 OS=Danio rerio OX=7955 GN=si:ch73-173p19.1 PE=1 SV=1	100350	10	si:ch73-173p19.1
tr|Q6NW48|Q6NW48_DANRE	0.20033	1.14896	0.300307	tr|Q6NW48|Q6NW48_DANRE Plcb4 protein (Fragment) OS=Danio rerio OX=7955 GN=plcb4 PE=2 SV=1	38232	7	plcb4
tr|Q6PC73|Q6PC73_DANRE	0.200183	1.14884	0.228157	tr|Q6PC73|Q6PC73_DANRE Growth factor receptor-bound protein 2 OS=Danio rerio OX=7955 GN=grb2b PE=1 SV=1	25287	2	grb2b
tr|Q08BV5|Q08BV5_DANRE	0.200084	1.14876	0.301254	tr|Q08BV5|Q08BV5_DANRE RAN GTPase-activating protein 1a OS=Danio rerio OX=7955 GN=rangap1a PE=1 SV=1	62014	18	rangap1a
tr|F1QMH7|F1QMH7_DANRE	0.20007	1.14875	0.745665	tr|F1QMH7|F1QMH7_DANRE Dystroglycan OS=Danio rerio OX=7955 GN=dag1 PE=1 SV=1	94602	6	dag1
tr|Q502L9|Q502L9_DANRE	0.199968	1.14867	0.47442	tr|Q502L9|Q502L9_DANRE Si:dkey-180p18.9 protein (Fragment) OS=Danio rerio OX=7955 GN=akr1b1.2 PE=2 SV=1	38888	16	akr1b1.2
tr|A0A0R4IRW0|A0A0R4IRW0_DANRE	0.199783	1.14853	0.602558	tr|A0A0R4IRW0|A0A0R4IRW0_DANRE Hyperpolarization-activated cyclic nucleotide-gated potassium channel 1 OS=Danio rerio OX=7955 GN=hcn1 PE=3 SV=1	101510	7	hcn1
tr|E7F784|E7F784_DANRE	0.199719	1.14847	0.562486	tr|E7F784|E7F784_DANRE ATP-binding cassette, sub-family F (GCN20), member 3 OS=Danio rerio OX=7955 GN=abcf3 PE=1 SV=3	27124	3	abcf3
tr|A5PMY5|A5PMY5_DANRE	0.198585	1.14757	0.437073	tr|A5PMY5|A5PMY5_DANRE Signal transducing adaptor molecule (SH3 domain and ITAM motif) 1 OS=Danio rerio OX=7955 GN=stam PE=1 SV=1	56996	12	stam
tr|A0A2R8RMK6|A0A2R8RMK6_DANRE	0.198498	1.1475	0.422065	tr|A0A2R8RMK6|A0A2R8RMK6_DANRE Kv channel interacting protein 4 OS=Danio rerio OX=7955 GN=kcnip4 PE=4 SV=1	24667	3	kcnip4
tr|Q6P124|Q6P124_DANRE	0.198343	1.14738	0.216427	tr|Q6P124|Q6P124_DANRE GTPase-activating protein (SH3 domain)-binding protein 1 OS=Danio rerio OX=7955 GN=g3bp1 PE=1 SV=1	53170	9	g3bp1
tr|Q7ZVX2|Q7ZVX2_DANRE	0.198032	1.14713	0.11084	tr|Q7ZVX2|Q7ZVX2_DANRE Sodium/potassium-transporting ATPase subunit beta OS=Danio rerio OX=7955 GN=atp1b1a PE=2 SV=1	35192	2	atp1b1a
tr|A0A2R8QAG9|A0A2R8QAG9_DANRE	0.197862	1.147	0.432236	tr|A0A2R8QAG9|A0A2R8QAG9_DANRE DGCR8 microprocessor complex subunit OS=Danio rerio OX=7955 GN=dgcr8 PE=1 SV=1	85105	4	dgcr8
tr|Q283H4|Q283H4_DANRE	0.197591	1.14678	0.550793	tr|Q283H4|Q283H4_DANRE AGS3 OS=Danio rerio OX=7955 GN=gpsm1b PE=2 SV=1	69309	5	gpsm1b
tr|A8E5K1|A8E5K1_DANRE	0.19747	1.14669	0.215138	tr|A8E5K1|A8E5K1_DANRE Polyol dehydrogenase OS=Danio rerio OX=7955 GN=sord PE=2 SV=1	38056	5	sord
sp|Q6IQT4|CSN2_DANRE	0.197454	1.14667	0.194202	sp|Q6IQT4|CSN2_DANRE COP9 signalosome complex subunit 2 OS=Danio rerio OX=7955 GN=cops2 PE=2 SV=1	51572	19	cops2
sp|Q568F6|PURA2_DANRE	0.197339	1.14658	0.163989	sp|Q568F6|PURA2_DANRE Adenylosuccinate synthetase isozyme 2 OS=Danio rerio OX=7955 GN=adss2 PE=2 SV=1	49720	9	adss2
tr|A2CG69|A2CG69_DANRE	0.197337	1.14658	0.242924	tr|A2CG69|A2CG69_DANRE Glutamate receptor OS=Danio rerio OX=7955 GN=gria3a PE=3 SV=1	100234	3	gria3a
tr|F1R557|F1R557_DANRE	0.197269	1.14653	0.458346	tr|F1R557|F1R557_DANRE PR domain-containing 11 OS=Danio rerio OX=7955 GN=prdm11 PE=4 SV=2	126279	3	prdm11
tr|A1L215|A1L215_DANRE	0.197079	1.14638	0.632164	tr|A1L215|A1L215_DANRE Zgc:158580 OS=Danio rerio OX=7955 GN=zgc:123103 PE=2 SV=1	36007	1	zgc:123103
tr|F1QHK0|F1QHK0_DANRE	0.196922	1.14625	0.344756	tr|F1QHK0|F1QHK0_DANRE Phosphoacetylglucosamine mutase OS=Danio rerio OX=7955 GN=pgm3 PE=1 SV=1	59703	19	pgm3
tr|F1QTD4|F1QTD4_DANRE	0.196763	1.14612	0.358665	tr|F1QTD4|F1QTD4_DANRE EFR3 homolog Ba (S. cerevisiae) OS=Danio rerio OX=7955 GN=efr3ba PE=4 SV=2	91591	1	efr3ba
tr|F1R7S1|F1R7S1_DANRE	0.196674	1.14605	0.211081	tr|F1R7S1|F1R7S1_DANRE Coatomer subunit epsilon OS=Danio rerio OX=7955 GN=cope PE=1 SV=2	34034	9	cope
sp|Q1LV17|I2BP1_DANRE	0.196669	1.14605	0.458615	sp|Q1LV17|I2BP1_DANRE Interferon regulatory factor 2-binding protein 1 OS=Danio rerio OX=7955 GN=irf2bp1 PE=2 SV=1	64906	5	irf2bp1
tr|A5WUQ3|A5WUQ3_DANRE	0.196048	1.14556	0.27309	tr|A5WUQ3|A5WUQ3_DANRE Transporter OS=Danio rerio OX=7955 GN=slc6a17 PE=1 SV=1	81084	11	slc6a17
tr|F1R096|F1R096_DANRE	0.195891	1.14543	0.187713	tr|F1R096|F1R096_DANRE General transcription factor IIH, polypeptide 4 OS=Danio rerio OX=7955 GN=gtf2h4 PE=3 SV=2	52966	7	gtf2h4
tr|Q1LWG2|Q1LWG2_DANRE	0.19553	1.14514	0.695474	tr|Q1LWG2|Q1LWG2_DANRE NADH dehydrogenase [ubiquinone] iron-sulfur protein 6, mitochondrial OS=Danio rerio OX=7955 GN=ndufs6 PE=1 SV=1	14232	3	ndufs6
tr|F1Q4N4|F1Q4N4_DANRE	0.195428	1.14506	0.470351	tr|F1Q4N4|F1Q4N4_DANRE Complex I-49kD OS=Danio rerio OX=7955 GN=ndufs2 PE=1 SV=1	52713	24	ndufs2
sp|P62084|RS7_DANRE	0.195318	1.14498	0.204013	sp|P62084|RS7_DANRE 40S ribosomal protein S7 OS=Danio rerio OX=7955 GN=rps7 PE=2 SV=1	22250	10	rps7
tr|E7F7V2|E7F7V2_DANRE	0.19517	1.14486	0.519561	tr|E7F7V2|E7F7V2_DANRE Si:ch211-234p18.3 OS=Danio rerio OX=7955 GN=si:ch211-234p18.3 PE=4 SV=1	143526	29	si:ch211-234p18.3
sp|Q9DFG8|MKRN2_DANRE	0.195093	1.1448	0.602462	sp|Q9DFG8|MKRN2_DANRE E3 ubiquitin-protein ligase makorin-2 OS=Danio rerio OX=7955 GN=mkrn2 PE=2 SV=2	46480	1	mkrn2
tr|A0A0R4IXD9|A0A0R4IXD9_DANRE	0.194944	1.14468	0.245074	tr|A0A0R4IXD9|A0A0R4IXD9_DANRE Tubulin-specific chaperone D OS=Danio rerio OX=7955 GN=tbcd PE=1 SV=1	133010	24	tbcd
tr|F1QF15|F1QF15_DANRE	0.194931	1.14467	0.180873	tr|F1QF15|F1QF15_DANRE Actin-related protein 2 OS=Danio rerio OX=7955 GN=actr2a PE=1 SV=1	44694	3	actr2a
tr|A0A2R8QDC7|A0A2R8QDC7_DANRE	0.194702	1.14449	0.252524	tr|A0A2R8QDC7|A0A2R8QDC7_DANRE Actinin, alpha 4 OS=Danio rerio OX=7955 GN=actn4 PE=1 SV=1	106179	5	actn4
tr|A0A0R4ILD9|A0A0R4ILD9_DANRE	0.194673	1.14446	0.474591	tr|A0A0R4ILD9|A0A0R4ILD9_DANRE Translation initiation factor eIF-2B subunit alpha OS=Danio rerio OX=7955 GN=eif2b1 PE=1 SV=1	33572	9	eif2b1
tr|B3DKM0|B3DKM0_DANRE	0.194565	1.14438	0.251098	tr|B3DKM0|B3DKM0_DANRE Aldehyde dehydrogenase 1 family, member A2 OS=Danio rerio OX=7955 GN=aldh1a2 PE=2 SV=1	56524	20	aldh1a2
tr|F1R9C6|F1R9C6_DANRE	0.19416	1.14406	0.146477	tr|F1R9C6|F1R9C6_DANRE Prohibitin OS=Danio rerio OX=7955 GN=phb2b PE=1 SV=2	33785	8	phb2b
tr|Q90X41|Q90X41_DANRE	0.194031	1.14396	0.242057	tr|Q90X41|Q90X41_DANRE Novel protein similar to human splicing factor 3a, subunit 1, 120kD (SF3A1) OS=Danio rerio OX=7955 GN=sf3a1 PE=1 SV=1	87916	19	sf3a1
tr|A0A0J9YJL9|A0A0J9YJL9_DANRE	0.19376	1.14374	0.21369	tr|A0A0J9YJL9|A0A0J9YJL9_DANRE AMP deaminase OS=Danio rerio OX=7955 GN=ampd2a PE=3 SV=3	89632	21	ampd2a
sp|B0V3F8|PRKRA_DANRE	0.193645	1.14365	0.259078	sp|B0V3F8|PRKRA_DANRE Interferon-inducible double-stranded RNA-dependent protein kinase activator A homolog OS=Danio rerio OX=7955 GN=prkra PE=2 SV=2	30840	10	prkra
sp|A4IG32|MICU1_DANRE	0.193538	1.14356	0.426768	sp|A4IG32|MICU1_DANRE Calcium uptake protein 1, mitochondrial OS=Danio rerio OX=7955 GN=micu1 PE=2 SV=1	55925	8	micu1
tr|Q504F8|Q504F8_DANRE	0.193489	1.14353	0.237343	tr|Q504F8|Q504F8_DANRE Pyroglutamyl-peptidase I OS=Danio rerio OX=7955 GN=pgpep1 PE=1 SV=1	23098	1	pgpep1
tr|F1QJ13|F1QJ13_DANRE	0.192751	1.14294	0.655467	tr|F1QJ13|F1QJ13_DANRE Phosphoinositide phospholipase C OS=Danio rerio OX=7955 GN=plcd3b PE=4 SV=1	87303	11	plcd3b
tr|A5WVI9|A5WVI9_DANRE	0.192245	1.14254	0.228917	tr|A5WVI9|A5WVI9_DANRE DnaJ heat shock protein family (Hsp40) member A2b OS=Danio rerio OX=7955 GN=dnaja2b PE=1 SV=1	45593	13	dnaja2b
tr|X1WFL9|X1WFL9_DANRE	0.192158	1.14247	0.425365	tr|X1WFL9|X1WFL9_DANRE 15-oxoprostaglandin 13-reductase OS=Danio rerio OX=7955 GN=ptgr2 PE=1 SV=1	37672	8	ptgr2
tr|A0A0R4I9U6|A0A0R4I9U6_DANRE	0.192152	1.14247	0.179659	tr|A0A0R4I9U6|A0A0R4I9U6_DANRE Protocadherin 2 alpha b 9 OS=Danio rerio OX=7955 GN=pcdh2ab9 PE=4 SV=2	109803	22	pcdh2ab9
tr|E1AZA6|E1AZA6_DANRE	0.191946	1.1423	0.326386	tr|E1AZA6|E1AZA6_DANRE Potassium voltage-gated channel, Shaw-related subfamily, member 3b OS=Danio rerio OX=7955 GN=kcnc3b PE=2 SV=1	72379	8	kcnc3b
tr|E7F092|E7F092_DANRE	0.191905	1.14227	0.212138	tr|E7F092|E7F092_DANRE Cyclin-dependent kinase 13 OS=Danio rerio OX=7955 GN=cdk13 PE=1 SV=1	141825	1	cdk13
tr|E9QFI5|E9QFI5_DANRE	0.191876	1.14225	0.55716	tr|E9QFI5|E9QFI5_DANRE Diazepam-binding inhibitor (GABA receptor modulator, acyl-CoA binding protein) OS=Danio rerio OX=7955 GN=dbi PE=1 SV=1	9616	5	dbi
tr|Q6PHF5|Q6PHF5_DANRE	0.19174	1.14214	0.258598	tr|Q6PHF5|Q6PHF5_DANRE Dihydrolipoamide acetyltransferase component of pyruvate dehydrogenase complex OS=Danio rerio OX=7955 GN=pdhx PE=2 SV=1	52001	16	pdhx
tr|A0A140LGP1|A0A140LGP1_DANRE	0.191614	1.14204	0.407932	tr|A0A140LGP1|A0A140LGP1_DANRE Bassoon (presynaptic cytomatrix protein) b (Fragment) OS=Danio rerio OX=7955 GN=bsnb PE=4 SV=1	20394	3	bsnb
tr|E7EZL0|E7EZL0_DANRE	0.191581	1.14201	0.78533	tr|E7EZL0|E7EZL0_DANRE Lemur tyrosine kinase 2 OS=Danio rerio OX=7955 GN=lmtk2 PE=4 SV=1	159177	7	lmtk2
tr|A0A2R8RKH5|A0A2R8RKH5_DANRE	0.191533	1.14198	0.588522	tr|A0A2R8RKH5|A0A2R8RKH5_DANRE Syntaxin 6 OS=Danio rerio OX=7955 GN=stx6 PE=3 SV=1	29202	6	stx6
tr|Q7T1D7|Q7T1D7_DANRE	0.191302	1.14179	0.219127	tr|Q7T1D7|Q7T1D7_DANRE Dimethylaniline monooxygenase [N-oxide-forming] OS=Danio rerio OX=7955 GN=fmo5 PE=1 SV=1	63819	18	fmo5
tr|F1QHG6|F1QHG6_DANRE	0.191211	1.14172	0.361608	tr|F1QHG6|F1QHG6_DANRE Im:7138535 OS=Danio rerio OX=7955 GN=im:7138535 PE=1 SV=2	39026	3	im:7138535
tr|A0A2R8Q9J9|A0A2R8Q9J9_DANRE	0.191062	1.1416	0.152429	tr|A0A2R8Q9J9|A0A2R8Q9J9_DANRE Gluconolactonase OS=Danio rerio OX=7955 GN=rgn PE=1 SV=1	32839	1	rgn
tr|E7F2E9|E7F2E9_DANRE	0.191046	1.14159	0.560084	tr|E7F2E9|E7F2E9_DANRE Si:ch73-167i17.6 OS=Danio rerio OX=7955 GN=si:ch73-167i17.6 PE=3 SV=2	25722	2	si:ch73-167i17.6
tr|Q7T372|Q7T372_DANRE	0.190878	1.14146	0.662359	tr|Q7T372|Q7T372_DANRE Actin-related protein 2/3 complex subunit OS=Danio rerio OX=7955 GN=arpc1b PE=1 SV=1	40885	7	arpc1b
tr|B1H1J7|B1H1J7_DANRE	0.190874	1.14145	0.404469	tr|B1H1J7|B1H1J7_DANRE Zgc:172284 protein OS=Danio rerio OX=7955 GN=camk1da PE=2 SV=1	47682	9	camk1da
sp|Q90Y50|CXAR_DANRE	0.190457	1.14113	0.518812	sp|Q90Y50|CXAR_DANRE Coxsackievirus and adenovirus receptor homolog OS=Danio rerio OX=7955 GN=cxadr PE=2 SV=1	40664	4	cxadr
sp|Q9DDE3|ACES_DANRE	0.190453	1.14112	0.447729	sp|Q9DDE3|ACES_DANRE Acetylcholinesterase OS=Danio rerio OX=7955 GN=ache PE=1 SV=1	71998	11	ache
sp|Q6TGY8|EMC2_DANRE	0.190309	1.14101	0.405693	sp|Q6TGY8|EMC2_DANRE ER membrane protein complex subunit 2 OS=Danio rerio OX=7955 GN=emc2 PE=2 SV=1	34456	8	emc2
tr|F5H8N4|F5H8N4_DANRE	0.190064	1.14081	0.157206	tr|F5H8N4|F5H8N4_DANRE Leucine-rich pentatricopeptide repeat-containing OS=Danio rerio OX=7955 GN=lrpprc PE=1 SV=2	163511	40	lrpprc
tr|E7F006|E7F006_DANRE	0.189923	1.1407	0.257606	tr|E7F006|E7F006_DANRE PITPNM family member 3 OS=Danio rerio OX=7955 GN=pitpnm3 PE=3 SV=1	104556	11	pitpnm3
tr|E7FH04|E7FH04_DANRE	0.189819	1.14062	0.235499	tr|E7FH04|E7FH04_DANRE Microtubule-associated protein (Fragment) OS=Danio rerio OX=7955 GN=mapta PE=4 SV=2	42508	2	mapta
tr|F1Q8L0|F1Q8L0_DANRE	0.189631	1.14047	0.423614	tr|F1Q8L0|F1Q8L0_DANRE 39S ribosomal protein L46, mitochondrial OS=Danio rerio OX=7955 GN=mrpl46 PE=1 SV=1	32815	6	mrpl46
tr|Q5RJ97|Q5RJ97_DANRE	0.18932	1.14023	0.763771	tr|Q5RJ97|Q5RJ97_DANRE 3-beta-hydroxysterol Delta (14)-reductase OS=Danio rerio OX=7955 GN=lbr PE=1 SV=1	70277	13	lbr
tr|A4QNT9|A4QNT9_DANRE	0.189136	1.14008	0.486194	tr|A4QNT9|A4QNT9_DANRE Signal transducer and activator of transcription OS=Danio rerio OX=7955 GN=stat5b PE=1 SV=1	89821	9	stat5b
tr|A0A0R4IRL4|A0A0R4IRL4_DANRE	0.189065	1.14002	0.235806	tr|A0A0R4IRL4|A0A0R4IRL4_DANRE ATP-binding cassette, sub-family D (ALD), member 3a OS=Danio rerio OX=7955 GN=abcd3a PE=1 SV=1	75019	13	abcd3a
tr|F1QIB3|F1QIB3_DANRE	0.188978	1.13996	0.250512	tr|F1QIB3|F1QIB3_DANRE Drebrin-like b OS=Danio rerio OX=7955 GN=dbnlb PE=1 SV=2	53997	4	dbnlb
tr|Q6PFU4|Q6PFU4_DANRE	0.188741	1.13977	0.275082	tr|Q6PFU4|Q6PFU4_DANRE Cell division control protein 42 homolog OS=Danio rerio OX=7955 GN=cdc42 PE=1 SV=1	21272	2	cdc42
tr|Q7ZUT5|Q7ZUT5_DANRE	0.188598	1.13966	0.344214	tr|Q7ZUT5|Q7ZUT5_DANRE cAMP-regulated phosphoprotein 19b OS=Danio rerio OX=7955 GN=arpp19b PE=1 SV=1	12431	3	arpp19b
tr|E9QDB6|E9QDB6_DANRE	0.188587	1.13965	0.633537	tr|E9QDB6|E9QDB6_DANRE Mitochondrial ribosomal protein S23 OS=Danio rerio OX=7955 GN=mrps23 PE=1 SV=1	21524	6	mrps23
tr|F1Q6K1|F1Q6K1_DANRE	0.188404	1.1395	0.434121	tr|F1Q6K1|F1Q6K1_DANRE Ubiquitin-specific peptidase 24 OS=Danio rerio OX=7955 GN=usp24 PE=1 SV=2	294931	32	usp24
tr|Q6NWY2|Q6NWY2_DANRE	0.188353	1.13946	0.363607	tr|Q6NWY2|Q6NWY2_DANRE Non-specific serine/threonine protein kinase OS=Danio rerio OX=7955 GN=oxsr1b PE=1 SV=1	57276	9	oxsr1b
sp|Q6PFJ9|ARI1_DANRE	0.188017	1.1392	0.589846	sp|Q6PFJ9|ARI1_DANRE E3 ubiquitin-protein ligase arih1 OS=Danio rerio OX=7955 GN=arih1 PE=2 SV=1	61654	1	arih1
tr|E7FA60|E7FA60_DANRE	0.187775	1.13901	0.509602	tr|E7FA60|E7FA60_DANRE Mitochondrial import inner membrane translocase subunit TIM22 OS=Danio rerio OX=7955 GN=timm22 PE=1 SV=1	21051	2	timm22
tr|A0A0R4IVY2|A0A0R4IVY2_DANRE	0.18753	1.13881	0.577239	tr|A0A0R4IVY2|A0A0R4IVY2_DANRE Insulin-like growth factor 2 mRNA-binding protein 2b OS=Danio rerio OX=7955 GN=igf2bp2b PE=1 SV=1	47233	3	igf2bp2b
sp|Q6NWF6|K2C8_DANRE	0.187409	1.13872	0.192248	sp|Q6NWF6|K2C8_DANRE Keratin, type II cytoskeletal 8 OS=Danio rerio OX=7955 GN=krt8 PE=1 SV=1	57760	26	krt8
tr|Q7ZW07|Q7ZW07_DANRE	0.187285	1.13862	0.477362	tr|Q7ZW07|Q7ZW07_DANRE Nucleoporin 155 OS=Danio rerio OX=7955 GN=nup155 PE=2 SV=1	155026	21	nup155
sp|A1A5H8|YES_DANRE	0.187163	1.13852	0.612516	sp|A1A5H8|YES_DANRE Tyrosine-protein kinase yes OS=Danio rerio OX=7955 GN=yes1 PE=1 SV=1	61269	7	yes1
tr|B0S673|B0S673_DANRE	0.186735	1.13819	0.564173	tr|B0S673|B0S673_DANRE Ribosomal protein L37 OS=Danio rerio OX=7955 GN=rpl37 PE=1 SV=1	15101	2	rpl37
tr|E7F0C0|E7F0C0_DANRE	0.186697	1.13815	0.676945	tr|E7F0C0|E7F0C0_DANRE Syntaxin-binding protein 5b (tomosyn) OS=Danio rerio OX=7955 GN=stxbp5b PE=3 SV=2	123569	8	stxbp5b
tr|A0A2R8QK93|A0A2R8QK93_DANRE	0.186643	1.13811	0.617504	tr|A0A2R8QK93|A0A2R8QK93_DANRE FACT complex subunit SSRP1 OS=Danio rerio OX=7955 GN=ssrp1a PE=1 SV=1	88130	6	ssrp1a
sp|Q6GQN0|CEP41_DANRE	0.186607	1.13808	0.555667	sp|Q6GQN0|CEP41_DANRE Centrosomal protein of 41 kDa OS=Danio rerio OX=7955 GN=cep41 PE=2 SV=1	41425	1	cep41
tr|E7EZD1|E7EZD1_DANRE	0.186598	1.13808	0.191673	tr|E7EZD1|E7EZD1_DANRE Neurobeachin a OS=Danio rerio OX=7955 GN=nbeaa PE=1 SV=2	332319	30	nbeaa
tr|A0A1D5NSW2|A0A1D5NSW2_DANRE	0.186531	1.13802	0.356177	tr|A0A1D5NSW2|A0A1D5NSW2_DANRE Cabz01076234.2 (Fragment) OS=Danio rerio OX=7955 GN=cabz01076234.2 PE=3 SV=1	56882	1	cabz01076234.2
tr|Q7SZR0|Q7SZR0_DANRE	0.186261	1.13781	0.489219	tr|Q7SZR0|Q7SZR0_DANRE Ddc protein OS=Danio rerio OX=7955 GN=ddc PE=1 SV=1	54293	7	ddc
tr|F1QT47|F1QT47_DANRE	0.186218	1.13778	0.378291	tr|F1QT47|F1QT47_DANRE Gamma-tubulin complex component OS=Danio rerio OX=7955 GN=tubgcp2 PE=1 SV=1	101678	16	tubgcp2
tr|A9JRF0|A9JRF0_DANRE	0.186187	1.13775	0.641234	tr|A9JRF0|A9JRF0_DANRE Zgc:172250 protein OS=Danio rerio OX=7955 GN=map2k2b PE=2 SV=1	43760	7	map2k2b
tr|B3DJ66|B3DJ66_DANRE	0.185494	1.13721	0.631771	tr|B3DJ66|B3DJ66_DANRE Zgc:194780 protein OS=Danio rerio OX=7955 GN=nrbp2b PE=2 SV=1	57461	11	nrbp2b
tr|A0A286Y7Z0|A0A286Y7Z0_DANRE	0.185365	1.1371	0.630229	tr|A0A286Y7Z0|A0A286Y7Z0_DANRE Protein-tyrosine-phosphatase OS=Danio rerio OX=7955 GN=ptprt PE=3 SV=2	161686	4	ptprt
tr|F1RB94|F1RB94_DANRE	0.185285	1.13704	0.513992	tr|F1RB94|F1RB94_DANRE U2 small nuclear RNA auxiliary factor 1 OS=Danio rerio OX=7955 GN=u2af1 PE=1 SV=1	28451	9	u2af1
tr|Q66I42|Q66I42_DANRE	0.185212	1.13698	0.417413	tr|Q66I42|Q66I42_DANRE Moesin a OS=Danio rerio OX=7955 GN=msna PE=1 SV=1	68033	31	msna
tr|A8WFV1|A8WFV1_DANRE	0.185196	1.13697	0.247626	tr|A8WFV1|A8WFV1_DANRE TNF receptor-associated protein 1 OS=Danio rerio OX=7955 GN=trap1 PE=1 SV=1	82118	2	trap1
sp|A9JRC7|PP4CB_DANRE	0.185142	1.13693	0.303587	sp|A9JRC7|PP4CB_DANRE Serine/threonine-protein phosphatase 4 catalytic subunit B OS=Danio rerio OX=7955 GN=ppp4cb PE=2 SV=1	35097	7	ppp4cb
tr|A4JYG7|A4JYG7_DANRE	0.184956	1.13678	0.391498	tr|A4JYG7|A4JYG7_DANRE Ncam3 (Fragment) OS=Danio rerio OX=7955 GN=ncam1b PE=2 SV=1	79393	3	ncam1b
tr|E7F8N8|E7F8N8_DANRE	0.184907	1.13674	0.581854	tr|E7F8N8|E7F8N8_DANRE Palm2 and akap2 fusion OS=Danio rerio OX=7955 GN=palm2akap2 PE=1 SV=3	91311	11	palm2akap2
tr|Q5TZG5|Q5TZG5_DANRE	0.184839	1.13669	0.209367	tr|Q5TZG5|Q5TZG5_DANRE Ezrin OS=Danio rerio OX=7955 GN=ezrb PE=1 SV=1	68726	24	ezrb
tr|A0A2R8RXU8|A0A2R8RXU8_DANRE	0.184716	1.13659	0.661806	tr|A0A2R8RXU8|A0A2R8RXU8_DANRE Cell cycle and apoptosis regulator 2 OS=Danio rerio OX=7955 GN=ccar2 PE=1 SV=1	87325	14	ccar2
tr|F1QZU7|F1QZU7_DANRE	0.184711	1.13659	0.30295	tr|F1QZU7|F1QZU7_DANRE Aldehyde dehydrogenase 2 family member, tandem duplicate 2 OS=Danio rerio OX=7955 GN=aldh2.2 PE=1 SV=2	56564	2	aldh2.2
tr|E7EYC8|E7EYC8_DANRE	0.184698	1.13658	0.228941	tr|E7EYC8|E7EYC8_DANRE SLIT-ROBO Rho GTPase-activating protein 3 OS=Danio rerio OX=7955 GN=srgap3 PE=1 SV=1	121156	1	srgap3
tr|A1A5Y4|A1A5Y4_DANRE	0.184512	1.13643	0.787739	tr|A1A5Y4|A1A5Y4_DANRE Dynein, cytoplasmic 1, intermediate chain 1 OS=Danio rerio OX=7955 GN=dync1i1 PE=2 SV=1	70469	8	dync1i1
tr|A1L261|A1L261_DANRE	0.184392	1.13634	0.418525	tr|A1L261|A1L261_DANRE LOC556725 protein (Fragment) OS=Danio rerio OX=7955 GN=fam131bb PE=2 SV=1	46962	4	fam131bb
tr|E7FE19|E7FE19_DANRE	0.184124	1.13613	0.28643	tr|E7FE19|E7FE19_DANRE 2',3'-cyclic nucleotide 3' phosphodiesterase OS=Danio rerio OX=7955 GN=cnp PE=1 SV=1	46520	21	cnp
tr|A0A2R8Q8H3|A0A2R8Q8H3_DANRE	0.183925	1.13597	0.58839	tr|A0A2R8Q8H3|A0A2R8Q8H3_DANRE Phosphatidylinositol 3,4,5-trisphosphate 3-phosphatase and dual-specificity protein phosphatase PTEN OS=Danio rerio OX=7955 GN=ptena PE=3 SV=1	49259	7	ptena
tr|A0A0R4IUM3|A0A0R4IUM3_DANRE	0.18363	1.13574	0.281906	tr|A0A0R4IUM3|A0A0R4IUM3_DANRE Amyloid beta (A4) precursor protein-binding, family A, member 1a OS=Danio rerio OX=7955 GN=apba1a PE=4 SV=2	107084	12	apba1a
tr|Q7ZVX4|Q7ZVX4_DANRE	0.183567	1.13569	0.235822	tr|Q7ZVX4|Q7ZVX4_DANRE Ras-related protein Rab-14 OS=Danio rerio OX=7955 GN=rab14 PE=1 SV=1	23875	2	rab14
tr|E7FFA5|E7FFA5_DANRE	0.183517	1.13565	0.504699	tr|E7FFA5|E7FFA5_DANRE Angiotensin-converting enzyme OS=Danio rerio OX=7955 GN=ace PE=1 SV=1	152783	27	ace
tr|A5PMC1|A5PMC1_DANRE	0.183351	1.13552	0.65892	tr|A5PMC1|A5PMC1_DANRE RING-type E3 ubiquitin transferase OS=Danio rerio OX=7955 GN=syvn1 PE=3 SV=1	68077	2	syvn1
tr|B0S6H6|B0S6H6_DANRE	0.182989	1.13523	0.273959	tr|B0S6H6|B0S6H6_DANRE Synaptophysin OS=Danio rerio OX=7955 GN=sypb PE=1 SV=1	32834	10	sypb
tr|Q4V8Z9|Q4V8Z9_DANRE	0.182934	1.13519	0.289027	tr|Q4V8Z9|Q4V8Z9_DANRE Geranylgeranyl transferase type I subunit beta OS=Danio rerio OX=7955 GN=pggt1b PE=2 SV=1	39971	1	pggt1b
tr|A0A2R8QKY7|A0A2R8QKY7_DANRE	0.182801	1.13509	0.272975	tr|A0A2R8QKY7|A0A2R8QKY7_DANRE Si:dkey-178k16.1 OS=Danio rerio OX=7955 GN=si:dkey-178k16.1 PE=1 SV=1	98286	0	si:dkey-178k16.1
tr|E7F4U8|E7F4U8_DANRE	0.182661	1.13498	0.268239	tr|E7F4U8|E7F4U8_DANRE SR-related CTD-associated factor 4a OS=Danio rerio OX=7955 GN=scaf4a PE=1 SV=2	118705	9	scaf4a
tr|A0A2R8RSL1|A0A2R8RSL1_DANRE	0.182611	1.13494	0.303593	tr|A0A2R8RSL1|A0A2R8RSL1_DANRE Zinc finger protein 346 OS=Danio rerio OX=7955 GN=znf346 PE=1 SV=1	34574	13	znf346
tr|A0A1D5NSN6|A0A1D5NSN6_DANRE	0.18246	1.13482	0.339805	tr|A0A1D5NSN6|A0A1D5NSN6_DANRE Zgc:175177 (Fragment) OS=Danio rerio OX=7955 GN=zgc:175177 PE=4 SV=1	29658	1	zgc:175177
tr|A0A1L1QZA6|A0A1L1QZA6_DANRE	0.182434	1.1348	0.538128	tr|A0A1L1QZA6|A0A1L1QZA6_DANRE Solute carrier organic anion transporter family member OS=Danio rerio OX=7955 GN=si:dkey-88i8.2 PE=3 SV=1	74116	1	si:dkey-88i8.2
tr|A0A0R4IHP8|A0A0R4IHP8_DANRE	0.182295	1.13469	0.382947	tr|A0A0R4IHP8|A0A0R4IHP8_DANRE Engulfment and cell motility 1 (ced-12 homolog, C. elegans) OS=Danio rerio OX=7955 GN=elmo1 PE=1 SV=1	85444	10	elmo1
tr|A4IG22|A4IG22_DANRE	0.18214	1.13457	0.574425	tr|A4IG22|A4IG22_DANRE Slc7a4 protein OS=Danio rerio OX=7955 GN=slc7a4 PE=2 SV=1	72904	4	slc7a4
tr|A0A0R4IWS0|A0A0R4IWS0_DANRE	0.182069	1.13451	0.365025	tr|A0A0R4IWS0|A0A0R4IWS0_DANRE Si:dkey-207m2.4 OS=Danio rerio OX=7955 GN=si:dkey-207m2.4 PE=4 SV=1	118455	1	si:dkey-207m2.4
tr|Q1LUG4|Q1LUG4_DANRE	0.182045	1.13449	0.718028	tr|Q1LUG4|Q1LUG4_DANRE Novel protein similar to vertebrate DDHD domain containing 1 (DDHD1) OS=Danio rerio OX=7955 GN=ddhd1b PE=4 SV=1	96583	4	ddhd1b
tr|Q6IQE6|Q6IQE6_DANRE	0.182014	1.13447	0.610585	tr|Q6IQE6|Q6IQE6_DANRE Small monomeric GTPase OS=Danio rerio OX=7955 GN=ralbb PE=2 SV=1	23319	2	ralbb
tr|R4GEM8|R4GEM8_DANRE	0.181465	1.13403	0.445649	tr|R4GEM8|R4GEM8_DANRE MMS19 nucleotide excision repair protein OS=Danio rerio OX=7955 GN=mms19 PE=1 SV=1	110623	14	mms19
tr|A0A2R8PZ85|A0A2R8PZ85_DANRE	0.181459	1.13403	0.555738	tr|A0A2R8PZ85|A0A2R8PZ85_DANRE Activating transcription factor 7b OS=Danio rerio OX=7955 GN=atf7b PE=3 SV=1	45265	2	atf7b
sp|Q7ZW25|CHM2A_DANRE	0.181448	1.13402	0.453522	sp|Q7ZW25|CHM2A_DANRE Charged multivesicular body protein 2a OS=Danio rerio OX=7955 GN=chmp2a PE=2 SV=1	25108	6	chmp2a
tr|B2GRZ6|B2GRZ6_DANRE	0.181327	1.13393	0.571413	tr|B2GRZ6|B2GRZ6_DANRE CXXC-type zinc finger protein 1 OS=Danio rerio OX=7955 GN=cxxc1b PE=2 SV=1	66570	3	cxxc1b
sp|Q5XJ36|PARK7_DANRE	0.181299	1.1339	0.428143	sp|Q5XJ36|PARK7_DANRE Parkinson disease protein 7 homolog OS=Danio rerio OX=7955 GN=park7 PE=2 SV=1	19764	9	park7
tr|F1QXI2|F1QXI2_DANRE	0.181155	1.13379	0.580368	tr|F1QXI2|F1QXI2_DANRE X-ray repair-complementing defective repair in Chinese hamster cells 1 OS=Danio rerio OX=7955 GN=xrcc1 PE=1 SV=1	68351	4	xrcc1
tr|B3DKP1|B3DKP1_DANRE	0.18111	1.13376	0.41154	tr|B3DKP1|B3DKP1_DANRE Receptor protein-tyrosine kinase OS=Danio rerio OX=7955 GN=flt1 PE=2 SV=1	142626	3	flt1
tr|A0A0R4IQ52|A0A0R4IQ52_DANRE	0.181043	1.1337	0.289153	tr|A0A0R4IQ52|A0A0R4IQ52_DANRE Si:ch211-132g1.3 OS=Danio rerio OX=7955 GN=si:ch211-132g1.3 PE=4 SV=2	27243	9	si:ch211-132g1.3
tr|B3DGZ2|B3DGZ2_DANRE	0.18086	1.13356	0.537566	tr|B3DGZ2|B3DGZ2_DANRE Glutamate receptor OS=Danio rerio OX=7955 GN=gria4a PE=2 SV=1	100416	0	gria4a
tr|F1RA35|F1RA35_DANRE	0.180746	1.13347	0.265583	tr|F1RA35|F1RA35_DANRE Microtubule actin crosslinking factor 1a OS=Danio rerio OX=7955 GN=macf1a PE=1 SV=2	652460	2	macf1a
tr|Q5SPG8|Q5SPG8_DANRE	0.18063	1.13338	0.481646	tr|Q5SPG8|Q5SPG8_DANRE Acyl-CoA thioesterase 20 OS=Danio rerio OX=7955 GN=acot20 PE=1 SV=1	48602	13	acot20
tr|F1QCM0|F1QCM0_DANRE	0.180609	1.13336	0.417659	tr|F1QCM0|F1QCM0_DANRE Ubiquitinyl hydrolase 1 (Fragment) OS=Danio rerio OX=7955 GN=vcpip1 PE=1 SV=1	121606	20	vcpip1
tr|Q6DGZ5|Q6DGZ5_DANRE	0.180535	1.1333	0.54001	tr|Q6DGZ5|Q6DGZ5_DANRE Guanine nucleotide-binding protein subunit gamma OS=Danio rerio OX=7955 GN=gng7 PE=1 SV=1	7539	4	gng7
tr|Q1WGB5|Q1WGB5_DANRE	0.180443	1.13323	0.415019	tr|Q1WGB5|Q1WGB5_DANRE Transporter OS=Danio rerio OX=7955 GN=slc6a4a PE=2 SV=1	72121	4	slc6a4a
sp|Q6DH65|DENR_DANRE	0.180401	1.1332	0.467046	sp|Q6DH65|DENR_DANRE Density-regulated protein OS=Danio rerio OX=7955 GN=denr PE=1 SV=1	22804	5	denr
tr|A0A1L1QZH7|A0A1L1QZH7_DANRE	0.180396	1.1332	0.375998	tr|A0A1L1QZH7|A0A1L1QZH7_DANRE CREB-regulated transcription coactivator 3 OS=Danio rerio OX=7955 GN=crtc3 PE=3 SV=2	24445	1	crtc3
tr|F1R097|F1R097_DANRE	0.180359	1.13317	0.216776	tr|F1R097|F1R097_DANRE CASK-interacting protein 1 OS=Danio rerio OX=7955 GN=caskin1 PE=4 SV=3	149336	29	caskin1
tr|F1Q740|F1Q740_DANRE	0.180159	1.13301	0.17046	tr|F1Q740|F1Q740_DANRE Valine--tRNA ligase OS=Danio rerio OX=7955 GN=vars1 PE=1 SV=2	143438	29	vars1
sp|Q5D016|PFD1_DANRE	0.18012	1.13298	0.527141	sp|Q5D016|PFD1_DANRE Prefoldin subunit 1 OS=Danio rerio OX=7955 GN=pfdn1 PE=2 SV=1	13987	3	pfdn1
tr|F1QFY3|F1QFY3_DANRE	0.180063	1.13293	0.74293	tr|F1QFY3|F1QFY3_DANRE Tyrosine-protein phosphatase OS=Danio rerio OX=7955 GN=ptpn4b PE=3 SV=4	106250	11	ptpn4b
tr|Q7T358|Q7T358_DANRE	0.179827	1.13275	0.233684	tr|Q7T358|Q7T358_DANRE G1 to S phase transition 1 OS=Danio rerio OX=7955 GN=gspt1l PE=1 SV=1	63671	9	gspt1l
tr|Q6PBS2|Q6PBS2_DANRE	0.179602	1.13257	0.353584	tr|Q6PBS2|Q6PBS2_DANRE Zgc:73275 OS=Danio rerio OX=7955 GN=viml PE=2 SV=1	51570	1	viml
tr|F1Q5S9|F1Q5S9_DANRE	0.17947	1.13247	0.54055	tr|F1Q5S9|F1Q5S9_DANRE Signal peptidase complex subunit 2 OS=Danio rerio OX=7955 GN=spcs2 PE=1 SV=2	23150	1	spcs2
tr|B0S620|B0S620_DANRE	0.179449	1.13245	0.381821	tr|B0S620|B0S620_DANRE Nuclear receptor-binding protein 2a OS=Danio rerio OX=7955 GN=nrbp2a PE=4 SV=1	57184	4	nrbp2a
tr|Q4U0S6|Q4U0S6_DANRE	0.179265	1.13231	0.44686	tr|Q4U0S6|Q4U0S6_DANRE Vesicle-fusing ATPase OS=Danio rerio OX=7955 GN=nsfb PE=2 SV=1	82796	11	nsfb
tr|A0A140LGK1|A0A140LGK1_DANRE	0.179167	1.13223	0.55023	tr|A0A140LGK1|A0A140LGK1_DANRE Plastin-2 OS=Danio rerio OX=7955 GN=lcp1 PE=1 SV=2	69802	30	lcp1
tr|Q503H8|Q503H8_DANRE	0.179145	1.13221	0.390495	tr|Q503H8|Q503H8_DANRE Tetraspanin OS=Danio rerio OX=7955 GN=tspan2a PE=1 SV=1	23083	2	tspan2a
tr|F1Q5T1|F1Q5T1_DANRE	0.179101	1.13218	0.415649	tr|F1Q5T1|F1Q5T1_DANRE STE20-related adaptor alpha OS=Danio rerio OX=7955 GN=strada PE=1 SV=1	41902	4	strada
tr|A0A2R8RHL8|A0A2R8RHL8_DANRE	0.178819	1.13196	0.486213	tr|A0A2R8RHL8|A0A2R8RHL8_DANRE Kalirin RhoGEF kinase b OS=Danio rerio OX=7955 GN=kalrnb PE=4 SV=1	262088	32	kalrnb
tr|Q8JGT0|Q8JGT0_DANRE	0.178786	1.13193	0.307559	tr|Q8JGT0|Q8JGT0_DANRE Casein kinase 1, alpha 1 OS=Danio rerio OX=7955 GN=csnk1a1 PE=1 SV=1	37537	14	csnk1a1
sp|Q7ZVA0|SMU1_DANRE	0.178606	1.13179	0.329025	sp|Q7ZVA0|SMU1_DANRE WD40 repeat-containing protein SMU1 OS=Danio rerio OX=7955 GN=smu1 PE=2 SV=1	57531	15	smu1
tr|F1QSN8|F1QSN8_DANRE	0.178436	1.13166	0.773841	tr|F1QSN8|F1QSN8_DANRE GH3 domain-containing OS=Danio rerio OX=7955 GN=ghdc PE=1 SV=1	70440	6	ghdc
tr|Q8AW60|Q8AW60_DANRE	0.178257	1.13152	0.324547	tr|Q8AW60|Q8AW60_DANRE Butyryl-CoA dehydrogenase OS=Danio rerio OX=7955 GN=ivd PE=1 SV=1	45845	16	ivd
tr|Q52WY6|Q52WY6_DANRE	0.178162	1.13144	0.543368	tr|Q52WY6|Q52WY6_DANRE Ras-like protein Rhogb (Fragment) OS=Danio rerio OX=7955 GN=rhogb PE=2 SV=1	21287	4	rhogb
tr|A0A0R4IIP1|A0A0R4IIP1_DANRE	0.177966	1.13129	0.510016	tr|A0A0R4IIP1|A0A0R4IIP1_DANRE tRNA-dihydrouridine(47) synthase [NAD(P)(+)] OS=Danio rerio OX=7955 GN=dus3l PE=1 SV=2	75464	3	dus3l
tr|Q8QGQ2|Q8QGQ2_DANRE	0.177784	1.13115	0.28202	tr|Q8QGQ2|Q8QGQ2_DANRE Aldehyde dehydrogenase 2 OS=Danio rerio OX=7955 GN=aldh2.1 PE=2 SV=1	56563	2	aldh2.1
tr|A5PL57|A5PL57_DANRE	0.177689	1.13107	0.600666	tr|A5PL57|A5PL57_DANRE SRCR domain-containing protein (Fragment) OS=Danio rerio OX=7955 GN=cfi PE=2 SV=1	44800	1	cfi
tr|A0A0G2KPR3|A0A0G2KPR3_DANRE	0.177454	1.13089	0.597118	tr|A0A0G2KPR3|A0A0G2KPR3_DANRE Ubiquitin-like modifier-activating enzyme ATG7 OS=Danio rerio OX=7955 GN=atg7 PE=1 SV=2	78765	17	atg7
tr|Q1LXZ5|Q1LXZ5_DANRE	0.177148	1.13065	0.279307	tr|Q1LXZ5|Q1LXZ5_DANRE Nudix (nucleoside diphosphate-linked moiety X)-type motif 14 OS=Danio rerio OX=7955 GN=nudt14 PE=1 SV=1	27222	8	nudt14
tr|Q6PC22|Q6PC22_DANRE	0.177086	1.1306	0.487767	tr|Q6PC22|Q6PC22_DANRE NADH dehydrogenase [ubiquinone] 1 alpha subcomplex subunit 8 OS=Danio rerio OX=7955 GN=ndufa8 PE=1 SV=1	20006	12	ndufa8
tr|A0A2R8RUX3|A0A2R8RUX3_DANRE	0.176771	1.13035	0.620707	tr|A0A2R8RUX3|A0A2R8RUX3_DANRE EH domain-binding protein 1 OS=Danio rerio OX=7955 GN=ehbp1 PE=4 SV=1	124295	1	ehbp1
tr|B8A6G0|B8A6G0_DANRE	0.176683	1.13028	0.397132	tr|B8A6G0|B8A6G0_DANRE Calpain 1, (mu/I) large subunit a OS=Danio rerio OX=7955 GN=capn1a PE=1 SV=1	80498	18	capn1a
tr|A8WHV7|A8WHV7_DANRE	0.176653	1.13026	0.284265	tr|A8WHV7|A8WHV7_DANRE Mitochondrial ribosomal protein S36 OS=Danio rerio OX=7955 GN=mrps36 PE=1 SV=1	12144	5	mrps36
tr|A0A0R4IN26|A0A0R4IN26_DANRE	0.176351	1.13002	0.557449	tr|A0A0R4IN26|A0A0R4IN26_DANRE Septin OS=Danio rerio OX=7955 GN=sept15 PE=1 SV=1	49636	1	sept15
tr|B8JIF1|B8JIF1_DANRE	0.17622	1.12992	0.435961	tr|B8JIF1|B8JIF1_DANRE Arsenite methyltransferase OS=Danio rerio OX=7955 GN=as3mt PE=1 SV=1	41612	10	as3mt
tr|B3DFX5|B3DFX5_DANRE	0.176176	1.12988	0.229348	tr|B3DFX5|B3DFX5_DANRE Non-specific serine/threonine protein kinase OS=Danio rerio OX=7955 GN=braf PE=1 SV=1	86434	12	braf
tr|A0A0R4IUT7|A0A0R4IUT7_DANRE	0.176165	1.12988	0.338012	tr|A0A0R4IUT7|A0A0R4IUT7_DANRE IQ motif and Sec7 domain ArfGEF 3a OS=Danio rerio OX=7955 GN=iqsec3a PE=3 SV=2	141352	19	iqsec3a
tr|A0A0G2KTT4|A0A0G2KTT4_DANRE	0.175962	1.12972	0.660556	tr|A0A0G2KTT4|A0A0G2KTT4_DANRE Si:dkey-167k11.5 OS=Danio rerio OX=7955 GN=ccdc134 PE=1 SV=1	26247	7	ccdc134
sp|Q6DH23|V26BL_DANRE	0.17571	1.12952	0.532369	sp|Q6DH23|V26BL_DANRE Vacuolar protein sorting-associated protein 26B-like OS=Danio rerio OX=7955 GN=vps26bl PE=2 SV=1	38377	4	vps26bl
tr|B8JLR1|B8JLR1_DANRE	0.1757	1.12951	0.289447	tr|B8JLR1|B8JLR1_DANRE Programmed cell death 6-interacting protein OS=Danio rerio OX=7955 GN=pdcd6ip PE=1 SV=1	95771	45	pdcd6ip
tr|A0A0R4IL71|A0A0R4IL71_DANRE	0.175648	1.12947	0.448702	tr|A0A0R4IL71|A0A0R4IL71_DANRE Insulin-degrading enzyme OS=Danio rerio OX=7955 GN=ide PE=1 SV=1	115533	15	ide
tr|A8E7N5|A8E7N5_DANRE	0.175583	1.12942	0.282553	tr|A8E7N5|A8E7N5_DANRE Vacuolar protein sorting 45 homolog OS=Danio rerio OX=7955 GN=vps45 PE=1 SV=1	64899	23	vps45
tr|A0A0R4IIH0|A0A0R4IIH0_DANRE	0.175392	1.12927	0.392684	tr|A0A0R4IIH0|A0A0R4IIH0_DANRE Ubiquitin family domain-containing 1 OS=Danio rerio OX=7955 GN=ubfd1 PE=1 SV=2	32018	4	ubfd1
sp|Q7ZUC2|CAB45_DANRE	0.175358	1.12924	0.612927	sp|Q7ZUC2|CAB45_DANRE 45 kDa calcium-binding protein OS=Danio rerio OX=7955 GN=sdf4 PE=2 SV=1	41704	9	sdf4
tr|B8A4Q2|B8A4Q2_DANRE	0.175313	1.12921	0.311646	tr|B8A4Q2|B8A4Q2_DANRE Pyridoxal kinase OS=Danio rerio OX=7955 GN=pdxkb PE=1 SV=1	34171	15	pdxkb
tr|Q1ECX9|Q1ECX9_DANRE	0.175086	1.12903	0.168134	tr|Q1ECX9|Q1ECX9_DANRE Protein disulfide-isomerase A4 OS=Danio rerio OX=7955 GN=pdia4 PE=1 SV=1	72467	27	pdia4
tr|A0A140LGL8|A0A140LGL8_DANRE	0.174977	1.12895	0.644027	tr|A0A140LGL8|A0A140LGL8_DANRE Trafficking protein particle complex subunit 10 (Fragment) OS=Danio rerio OX=7955 GN=trappc10 PE=1 SV=1	52993	1	trappc10
tr|B3DGT0|B3DGT0_DANRE	0.174952	1.12893	0.288405	tr|B3DGT0|B3DGT0_DANRE Protein phosphatase 1E (PP2C domain containing) OS=Danio rerio OX=7955 GN=ppm1e PE=2 SV=1	70953	10	ppm1e
sp|Q6NUX8|RHOAA_DANRE	0.174729	1.12875	0.378357	sp|Q6NUX8|RHOAA_DANRE Rho-related GTP-binding protein RhoA-A OS=Danio rerio OX=7955 GN=rhoaa PE=1 SV=1	21893	2	rhoaa
tr|F1RDR4|F1RDR4_DANRE	0.174563	1.12862	0.104892	tr|F1RDR4|F1RDR4_DANRE ADP-ribosylation factor-like 15b OS=Danio rerio OX=7955 GN=arl15b PE=1 SV=2	32703	5	arl15b
tr|A8E7G6|A8E7G6_DANRE	0.174406	1.1285	0.216064	tr|A8E7G6|A8E7G6_DANRE Peroxiredoxin 3 OS=Danio rerio OX=7955 GN=prdx3 PE=1 SV=1	30340	9	prdx3
tr|E7FAY4|E7FAY4_DANRE	0.173667	1.12792	0.321479	tr|E7FAY4|E7FAY4_DANRE Disco-interacting protein 2 homolog Ca OS=Danio rerio OX=7955 GN=dip2ca PE=1 SV=2	173025	24	dip2ca
tr|Q7SY59|Q7SY59_DANRE	0.1736	1.12787	0.413172	tr|Q7SY59|Q7SY59_DANRE Small monomeric GTPase OS=Danio rerio OX=7955 GN=rap2b PE=1 SV=1	20331	5	rap2b
tr|A0A2R8RUV2|A0A2R8RUV2_DANRE	0.173579	1.12785	0.478614	tr|A0A2R8RUV2|A0A2R8RUV2_DANRE Carnitine O-palmitoyltransferase OS=Danio rerio OX=7955 GN=cpt1ab PE=3 SV=1	88541	18	cpt1ab
tr|I3ITM8|I3ITM8_DANRE	0.17357	1.12785	0.42058	tr|I3ITM8|I3ITM8_DANRE Wiskott-Aldrich syndrome protein family member OS=Danio rerio OX=7955 GN=si:ch73-362m14.4 PE=3 SV=1	55186	10	si:ch73-362m14.4
tr|Q4V918|Q4V918_DANRE	0.173256	1.1276	0.254072	tr|Q4V918|Q4V918_DANRE Proteasome subunit alpha type OS=Danio rerio OX=7955 GN=psma3 PE=1 SV=1	28409	10	psma3
tr|Q7SYB8|Q7SYB8_DANRE	0.173199	1.12756	0.223239	tr|Q7SYB8|Q7SYB8_DANRE Glycogen [starch] synthase OS=Danio rerio OX=7955 GN=gys1 PE=1 SV=1	80473	10	gys1
tr|E7EYK8|E7EYK8_DANRE	0.173127	1.1275	0.7547	tr|E7EYK8|E7EYK8_DANRE HECT-type E3 ubiquitin transferase OS=Danio rerio OX=7955 GN=herc2 PE=1 SV=2	528562	11	herc2
tr|A0A286Y9P2|A0A286Y9P2_DANRE	0.173034	1.12743	0.712538	tr|A0A286Y9P2|A0A286Y9P2_DANRE Ral GTPase-activating protein non-catalytic subunit beta OS=Danio rerio OX=7955 GN=ralgapb PE=1 SV=2	165307	12	ralgapb
tr|A0A2R8QG76|A0A2R8QG76_DANRE	0.172796	1.12724	0.638537	tr|A0A2R8QG76|A0A2R8QG76_DANRE Translin-associated factor X OS=Danio rerio OX=7955 GN=tsnax PE=1 SV=1	31814	11	tsnax
tr|A2AWE1|A2AWE1_DANRE	0.172714	1.12718	0.382613	tr|A2AWE1|A2AWE1_DANRE Peroxiredoxin-1 OS=Danio rerio OX=7955 GN=prdx1 PE=1 SV=2	22061	8	prdx1
tr|A0A0R4ID58|A0A0R4ID58_DANRE	0.172393	1.12693	0.600053	tr|A0A0R4ID58|A0A0R4ID58_DANRE E3 ubiquitin protein ligase OS=Danio rerio OX=7955 GN=rnf40 PE=1 SV=1	115401	14	rnf40
tr|B0UYE9|B0UYE9_DANRE	0.17225	1.12681	0.257166	tr|B0UYE9|B0UYE9_DANRE GRIP1-associated protein 1 OS=Danio rerio OX=7955 GN=gripap1 PE=1 SV=1	98622	41	gripap1
sp|Q5TZ18|NAV3_DANRE	0.171958	1.12659	0.466269	sp|Q5TZ18|NAV3_DANRE Neuron navigator 3 OS=Danio rerio OX=7955 GN=nav3 PE=3 SV=1	242554	13	nav3
tr|B8A5L1|B8A5L1_DANRE	0.171727	1.12641	0.164538	tr|B8A5L1|B8A5L1_DANRE Ecm29 proteasome adaptor and scaffold OS=Danio rerio OX=7955 GN=ecpas PE=1 SV=1	206047	38	ecpas
sp|Q6TGS6|SYYC_DANRE	0.171606	1.12631	0.322798	sp|Q6TGS6|SYYC_DANRE Tyrosine--tRNA ligase, cytoplasmic OS=Danio rerio OX=7955 GN=yars1 PE=2 SV=2	59534	29	yars1
tr|Q7ZWB4|Q7ZWB4_DANRE	0.17155	1.12627	0.740107	tr|Q7ZWB4|Q7ZWB4_DANRE ADP-ribosylation factor-like 6 interacting protein OS=Danio rerio OX=7955 GN=arl6ip1 PE=1 SV=1	23182	2	arl6ip1
tr|Q90ZC5|Q90ZC5_DANRE	0.171089	1.12591	0.214597	tr|Q90ZC5|Q90ZC5_DANRE Peptidylprolyl isomerase OS=Danio rerio OX=7955 GN=aip PE=2 SV=1	38334	10	aip
sp|Q7T163|KDISB_DANRE	0.171057	1.12588	0.213741	sp|Q7T163|KDISB_DANRE Kinase D-interacting substrate of 220 kDa B OS=Danio rerio OX=7955 GN=kidins220b PE=1 SV=3	185949	26	kidins220b
tr|A0A0G2L2Q2|A0A0G2L2Q2_DANRE	0.171054	1.12588	0.417771	tr|A0A0G2L2Q2|A0A0G2L2Q2_DANRE Complex III subunit 9 OS=Danio rerio OX=7955 GN=uqcr10 PE=1 SV=1	7222	2	uqcr10
tr|E7F7C3|E7F7C3_DANRE	0.170998	1.12584	0.618582	tr|E7F7C3|E7F7C3_DANRE PDZ domain-containing 8 OS=Danio rerio OX=7955 GN=pdzd8 PE=4 SV=1	131460	15	pdzd8
tr|F1QL68|F1QL68_DANRE	0.170912	1.12577	0.168326	tr|F1QL68|F1QL68_DANRE HECT-type E3 ubiquitin transferase (Fragment) OS=Danio rerio OX=7955 GN=huwe1 PE=1 SV=1	488244	90	huwe1
tr|A0A2R8PX95|A0A2R8PX95_DANRE	0.170865	1.12573	0.405089	tr|A0A2R8PX95|A0A2R8PX95_DANRE Protocadherin 2 gamma 17 OS=Danio rerio OX=7955 GN=pcdh2g17 PE=4 SV=1	102987	3	pcdh2g17
sp|Q08CL8|CNO10_DANRE	0.170746	1.12564	0.603309	sp|Q08CL8|CNO10_DANRE CCR4-NOT transcription complex subunit 10 OS=Danio rerio OX=7955 GN=cnot10 PE=2 SV=1	68257	5	cnot10
tr|B8JLA1|B8JLA1_DANRE	0.170586	1.12552	0.453597	tr|B8JLA1|B8JLA1_DANRE Si:ch211-168b3.1 OS=Danio rerio OX=7955 GN=si:ch211-168b3.1 PE=4 SV=2	92900	8	si:ch211-168b3.1
tr|Q1ED17|Q1ED17_DANRE	0.170563	1.1255	0.348962	tr|Q1ED17|Q1ED17_DANRE DNA topoisomerase I OS=Danio rerio OX=7955 GN=top1l PE=1 SV=1	89786	10	top1l
sp|Q7ZU42|OLA1_DANRE	0.170478	1.12543	0.298291	sp|Q7ZU42|OLA1_DANRE Obg-like ATPase 1 OS=Danio rerio OX=7955 GN=ola1 PE=2 SV=1	44902	23	ola1
sp|Q5XIZ6|GPD1L_DANRE	0.170435	1.1254	0.236823	sp|Q5XIZ6|GPD1L_DANRE Glycerol-3-phosphate dehydrogenase 1-like protein OS=Danio rerio OX=7955 GN=gpd1l PE=2 SV=1	38285	15	gpd1l
tr|A0A2R8QKP7|A0A2R8QKP7_DANRE	0.170293	1.12529	0.534569	tr|A0A2R8QKP7|A0A2R8QKP7_DANRE Cyclic nucleotide ras GEF OS=Danio rerio OX=7955 GN=rapgef2 PE=3 SV=1	180830	29	rapgef2
tr|B0S5C4|B0S5C4_DANRE	0.16982	1.12492	0.299184	tr|B0S5C4|B0S5C4_DANRE Acyl-CoA synthetase long chain family member 3b OS=Danio rerio OX=7955 GN=acsl3b PE=1 SV=1	78806	29	acsl3b
tr|A0A2R8PY75|A0A2R8PY75_DANRE	0.169798	1.1249	0.385442	tr|A0A2R8PY75|A0A2R8PY75_DANRE Isocitrate dehydrogenase [NAD] subunit, mitochondrial OS=Danio rerio OX=7955 GN=idh3b PE=1 SV=1	41973	1	idh3b
tr|Q7ZTT4|Q7ZTT4_DANRE	0.169701	1.12483	0.494907	tr|Q7ZTT4|Q7ZTT4_DANRE Chloride intracellular channel 4 OS=Danio rerio OX=7955 GN=clic4 PE=1 SV=1	28371	10	clic4
sp|Q7T3C7|RT4I1_DANRE	0.169674	1.1248	0.395126	sp|Q7T3C7|RT4I1_DANRE Reticulon-4-interacting protein 1 homolog, mitochondrial OS=Danio rerio OX=7955 GN=rtn4ip1 PE=2 SV=2	42328	14	rtn4ip1
tr|F1QZB0|F1QZB0_DANRE	0.169648	1.12478	0.602824	tr|F1QZB0|F1QZB0_DANRE Cysteine-rich protein 2 OS=Danio rerio OX=7955 GN=crip2 PE=1 SV=1	22220	3	crip2
tr|Q6PBZ5|Q6PBZ5_DANRE	0.169506	1.12467	0.238207	tr|Q6PBZ5|Q6PBZ5_DANRE Allograft inflammatory factor 1-like OS=Danio rerio OX=7955 GN=aif1l PE=1 SV=1	16933	3	aif1l
tr|Q1LV25|Q1LV25_DANRE	0.169433	1.12462	0.71713	tr|Q1LV25|Q1LV25_DANRE Hyaluronan and proteoglycan link protein 4 OS=Danio rerio OX=7955 GN=hapln4 PE=4 SV=1	39157	3	hapln4
sp|Q6DC04|CARM1_DANRE	0.16922	1.12445	0.591948	sp|Q6DC04|CARM1_DANRE Histone-arginine methyltransferase CARM1 OS=Danio rerio OX=7955 GN=carm1 PE=2 SV=1	64896	14	carm1
tr|B8A446|B8A446_DANRE	0.169177	1.12442	0.537123	tr|B8A446|B8A446_DANRE ATP-binding cassette, sub-family A (ABC1), member 1A OS=Danio rerio OX=7955 GN=abca1a PE=4 SV=1	254369	3	abca1a
tr|Q3ZB95|Q3ZB95_DANRE	0.168936	1.12423	0.444627	tr|Q3ZB95|Q3ZB95_DANRE Mannose-6-phosphate isomerase OS=Danio rerio OX=7955 GN=mpi PE=1 SV=1	46260	15	mpi
tr|A0A2R8QRQ5|A0A2R8QRQ5_DANRE	0.168752	1.12409	0.698978	tr|A0A2R8QRQ5|A0A2R8QRQ5_DANRE AP-2 transcription factor OS=Danio rerio OX=7955 GN=tfap2a PE=1 SV=1	49921	6	tfap2a
tr|F1QLW3|F1QLW3_DANRE	0.168646	1.124	0.745233	tr|F1QLW3|F1QLW3_DANRE Pirin OS=Danio rerio OX=7955 GN=pir PE=1 SV=1	32336	7	pir
tr|F1Q9A0|F1Q9A0_DANRE	0.168502	1.12389	0.705687	tr|F1Q9A0|F1Q9A0_DANRE Sorbin and SH3 domain-containing 2a (Fragment) OS=Danio rerio OX=7955 GN=sorbs2a PE=1 SV=1	140836	7	sorbs2a
tr|Q6PFU1|Q6PFU1_DANRE	0.168494	1.12388	0.265954	tr|Q6PFU1|Q6PFU1_DANRE Tetraspanin OS=Danio rerio OX=7955 GN=cd81a PE=1 SV=1	26198	7	cd81a
tr|E7FAU9|E7FAU9_DANRE	0.168431	1.12384	0.344162	tr|E7FAU9|E7FAU9_DANRE Non-specific serine/threonine protein kinase OS=Danio rerio OX=7955 GN=pik3r4 PE=1 SV=2	151610	9	pik3r4
tr|A2CF31|A2CF31_DANRE	0.168407	1.12382	0.421215	tr|A2CF31|A2CF31_DANRE Ataxin 2 OS=Danio rerio OX=7955 GN=atxn2 PE=3 SV=2	118689	12	atxn2
tr|A0A0R4IUW1|A0A0R4IUW1_DANRE	0.168223	1.12367	0.693242	tr|A0A0R4IUW1|A0A0R4IUW1_DANRE Copine III OS=Danio rerio OX=7955 GN=cpne3 PE=1 SV=1	59856	13	cpne3
tr|A0A2R8QPG3|A0A2R8QPG3_DANRE	0.168091	1.12357	0.592983	tr|A0A2R8QPG3|A0A2R8QPG3_DANRE Lamin A OS=Danio rerio OX=7955 GN=lmna PE=1 SV=1	75574	22	lmna
tr|Q6PBT1|Q6PBT1_DANRE	0.168029	1.12352	0.197082	tr|Q6PBT1|Q6PBT1_DANRE 40S ribosomal protein S27 OS=Danio rerio OX=7955 GN=rps27.2 PE=1 SV=1	9503	2	rps27.2
tr|A0A286YA24|A0A286YA24_DANRE	0.167912	1.12343	0.62949	tr|A0A286YA24|A0A286YA24_DANRE Mitochondrial ribosomal protein S22 OS=Danio rerio OX=7955 GN=mrps22 PE=1 SV=1	39524	10	mrps22
tr|F1Q9D9|F1Q9D9_DANRE	0.167906	1.12343	0.48574	tr|F1Q9D9|F1Q9D9_DANRE Receptor protein-tyrosine kinase OS=Danio rerio OX=7955 GN=epha3 PE=4 SV=3	108090	4	epha3
tr|R4GDQ0|R4GDQ0_DANRE	0.167802	1.12335	0.18789	tr|R4GDQ0|R4GDQ0_DANRE Tripeptidyl-peptidase 2 OS=Danio rerio OX=7955 GN=tpp2 PE=1 SV=1	139248	32	tpp2
tr|Q0QGJ3|Q0QGJ3_DANRE	0.167732	1.12329	0.273668	tr|Q0QGJ3|Q0QGJ3_DANRE Sorting nexin OS=Danio rerio OX=7955 GN=snx5 PE=2 SV=1	45918	9	snx5
tr|Q6PHF1|Q6PHF1_DANRE	0.167677	1.12325	0.22073	tr|Q6PHF1|Q6PHF1_DANRE Calcium-regulated heat-stable protein 1 OS=Danio rerio OX=7955 GN=carhsp1 PE=1 SV=1	16521	3	carhsp1
tr|A7YYI1|A7YYI1_DANRE	0.167193	1.12287	0.569646	tr|A7YYI1|A7YYI1_DANRE Zgc:64031 OS=Danio rerio OX=7955 GN=abhd14b PE=2 SV=1	22851	6	abhd14b
tr|A0A2R8PVN0|A0A2R8PVN0_DANRE	0.167124	1.12282	0.552498	tr|A0A2R8PVN0|A0A2R8PVN0_DANRE SPG7 matrix AAA peptidase subunit, paraplegin OS=Danio rerio OX=7955 GN=spg7 PE=3 SV=1	76797	10	spg7
tr|A7MCN0|A7MCN0_DANRE	0.167096	1.1228	0.617202	tr|A7MCN0|A7MCN0_DANRE Peptidyl-prolyl cis-trans isomerase OS=Danio rerio OX=7955 GN=ppifb PE=2 SV=1	20807	3	ppifb
tr|E9QIC1|E9QIC1_DANRE	0.16705	1.12276	0.572527	tr|E9QIC1|E9QIC1_DANRE CDC5 cell division cycle 5-like (S. pombe) OS=Danio rerio OX=7955 GN=cdc5l PE=1 SV=2	91725	18	cdc5l
tr|F1RES5|F1RES5_DANRE	0.166633	1.12244	0.537796	tr|F1RES5|F1RES5_DANRE Si:ch211-74f19.2 OS=Danio rerio OX=7955 GN=si:ch211-74f19.2 PE=1 SV=2	19227	6	si:ch211-74f19.2
tr|A5WVQ1|A5WVQ1_DANRE	0.166481	1.12232	0.737177	tr|A5WVQ1|A5WVQ1_DANRE Cell cycle-associated protein 1b OS=Danio rerio OX=7955 GN=caprin1b PE=1 SV=1	76694	4	caprin1b
sp|Q5SNX7|GALC_DANRE	0.166186	1.12209	0.410493	sp|Q5SNX7|GALC_DANRE Galactocerebrosidase OS=Danio rerio OX=7955 GN=galc PE=2 SV=1	73820	2	galc
sp|Q1LUK1|MIC13_DANRE	0.166093	1.12202	0.363128	sp|Q1LUK1|MIC13_DANRE MICOS complex subunit MIC13 OS=Danio rerio OX=7955 GN=micos13 PE=3 SV=1	11753	4	micos13
tr|Q0D284|Q0D284_DANRE	0.166081	1.12201	0.474136	tr|Q0D284|Q0D284_DANRE Zgc:153679 OS=Danio rerio OX=7955 GN=dhrs12 PE=2 SV=1	35633	1	dhrs12
tr|Q7ZUD6|Q7ZUD6_DANRE	0.165684	1.1217	0.374758	tr|Q7ZUD6|Q7ZUD6_DANRE Reticulon OS=Danio rerio OX=7955 GN=rtn3 PE=1 SV=1	24496	11	rtn3
tr|F1Q6T0|F1Q6T0_DANRE	0.165454	1.12152	0.501178	tr|F1Q6T0|F1Q6T0_DANRE Bassoon (presynaptic cytomatrix protein) b (Fragment) OS=Danio rerio OX=7955 GN=bsnb PE=1 SV=3	367240	72	bsnb
tr|E7F1A9|E7F1A9_DANRE	0.165313	1.12141	0.315524	tr|E7F1A9|E7F1A9_DANRE Neurofascin homolog (chicken) a OS=Danio rerio OX=7955 GN=nfasca PE=1 SV=2	152156	1	nfasca
tr|A0A0R4IMP0|A0A0R4IMP0_DANRE	0.165225	1.12134	0.293795	tr|A0A0R4IMP0|A0A0R4IMP0_DANRE Splicing factor U2AF subunit OS=Danio rerio OX=7955 GN=u2af2b PE=1 SV=1	54204	3	u2af2b
tr|A0A286Y9V7|A0A286Y9V7_DANRE	0.165218	1.12134	0.589369	tr|A0A286Y9V7|A0A286Y9V7_DANRE E3 ubiquitin-protein ligase OS=Danio rerio OX=7955 GN=wwp1 PE=1 SV=2	92281	2	wwp1
tr|X1WBS8|X1WBS8_DANRE	0.165213	1.12133	0.638521	tr|X1WBS8|X1WBS8_DANRE N-terminal EF-hand calcium-binding protein 3 (Fragment) OS=Danio rerio OX=7955 GN=necab3 PE=4 SV=1	44715	3	necab3
tr|Q6P3L1|Q6P3L1_DANRE	0.165125	1.12126	0.292622	tr|Q6P3L1|Q6P3L1_DANRE Polyadenylate-binding protein OS=Danio rerio OX=7955 GN=pabpc1b PE=1 SV=1	71025	6	pabpc1b
tr|A0A0R4IMG2|A0A0R4IMG2_DANRE	0.164987	1.12116	0.52322	tr|A0A0R4IMG2|A0A0R4IMG2_DANRE N-acetylglucosamine-6-sulfatase OS=Danio rerio OX=7955 GN=gnsb PE=1 SV=1	57098	3	gnsb
tr|A8KB57|A8KB57_DANRE	0.164983	1.12115	0.316279	tr|A8KB57|A8KB57_DANRE Zgc:171577 protein OS=Danio rerio OX=7955 GN=rpz5 PE=2 SV=1	45061	14	rpz5
tr|A0A0G2KK56|A0A0G2KK56_DANRE	0.164924	1.12111	0.332114	tr|A0A0G2KK56|A0A0G2KK56_DANRE Uncharacterized protein OS=Danio rerio OX=7955 PE=4 SV=2	56169	8	Uncharacterized protein
tr|E7F4W9|E7F4W9_DANRE	0.164891	1.12108	0.40334	tr|E7F4W9|E7F4W9_DANRE DOP1 leucine zipper-like protein B OS=Danio rerio OX=7955 GN=dop1b PE=4 SV=3	127447	8	dop1b
tr|E7EXI2|E7EXI2_DANRE	0.164616	1.12087	0.356118	tr|E7EXI2|E7EXI2_DANRE Seizure-related 6 homolog (mouse)-like 2 OS=Danio rerio OX=7955 GN=sez6l2 PE=4 SV=2	97694	10	sez6l2
tr|Q32LT0|Q32LT0_DANRE	0.164577	1.12084	0.37009	tr|Q32LT0|Q32LT0_DANRE Sorting nexin-2 OS=Danio rerio OX=7955 GN=snx2 PE=2 SV=1	57228	16	snx2
tr|A0A0R4INU1|A0A0R4INU1_DANRE	0.164506	1.12078	0.414991	tr|A0A0R4INU1|A0A0R4INU1_DANRE RNA-binding motif protein 12 OS=Danio rerio OX=7955 GN=rbm12 PE=1 SV=1	94104	16	rbm12
tr|A0A2R8QMA3|A0A2R8QMA3_DANRE	0.164471	1.12075	0.216061	tr|A0A2R8QMA3|A0A2R8QMA3_DANRE Protein-serine/threonine kinase OS=Danio rerio OX=7955 GN=pdk3a PE=3 SV=1	46483	16	pdk3a
tr|Q45RG8|Q45RG8_DANRE	0.164374	1.12068	0.478343	tr|Q45RG8|Q45RG8_DANRE Cystatin OS=Danio rerio OX=7955 GN=cst3 PE=2 SV=1	14144	5	cst3
tr|A0A2R8QQY5|A0A2R8QQY5_DANRE	0.16432	1.12064	0.722738	tr|A0A2R8QQY5|A0A2R8QQY5_DANRE Potassium channel tetramerization domain-containing 1 OS=Danio rerio OX=7955 GN=kctd1 PE=4 SV=1	29513	4	kctd1
tr|Q5VSI7|Q5VSI7_DANRE	0.164263	1.12059	0.259823	tr|Q5VSI7|Q5VSI7_DANRE RALBP1-associated Eps domain-containing 1 OS=Danio rerio OX=7955 GN=reps1 PE=1 SV=1	86436	11	reps1
sp|Q5BJJ6|MAT2B_DANRE	0.16368	1.12014	0.417102	sp|Q5BJJ6|MAT2B_DANRE Methionine adenosyltransferase 2 subunit beta OS=Danio rerio OX=7955 GN=mat2b PE=2 SV=1	36359	11	mat2b
sp|Q6DGZ0|GPT11_DANRE	0.163665	1.12013	0.454011	sp|Q6DGZ0|GPT11_DANRE G patch domain-containing protein 11 OS=Danio rerio OX=7955 GN=gpatch11 PE=2 SV=1	30347	3	gpatch11
tr|Q6PC34|Q6PC34_DANRE	0.163427	1.11994	0.333268	tr|Q6PC34|Q6PC34_DANRE Hippocalcin OS=Danio rerio OX=7955 GN=hpca PE=1 SV=1	22441	7	hpca
tr|Q0P4E8|Q0P4E8_DANRE	0.163421	1.11994	0.481669	tr|Q0P4E8|Q0P4E8_DANRE Mitochondrial import receptor subunit TOM7 homolog OS=Danio rerio OX=7955 GN=tomm7 PE=1 SV=1	6311	3	tomm7
tr|Q5XJV1|Q5XJV1_DANRE	0.163069	1.11967	0.381054	tr|Q5XJV1|Q5XJV1_DANRE Saccharopine dehydrogenase b OS=Danio rerio OX=7955 GN=sccpdhb PE=2 SV=1	46754	1	sccpdhb
tr|F1R0Z8|F1R0Z8_DANRE	0.16286	1.1195	0.507804	tr|F1R0Z8|F1R0Z8_DANRE Prefoldin subunit 4 OS=Danio rerio OX=7955 GN=pfdn4 PE=1 SV=1	15134	3	pfdn4
tr|F6PEI4|F6PEI4_DANRE	0.162633	1.11933	0.339018	tr|F6PEI4|F6PEI4_DANRE Zgc:158689 OS=Danio rerio OX=7955 GN=zgc:158689 PE=4 SV=1	66618	15	zgc:158689
tr|A0A2R8QCB9|A0A2R8QCB9_DANRE	0.162438	1.11918	0.460299	tr|A0A2R8QCB9|A0A2R8QCB9_DANRE SEC24 homolog B, COPII coat complex component OS=Danio rerio OX=7955 GN=sec24b PE=1 SV=1	124751	11	sec24b
tr|B3DJI0|B3DJI0_DANRE	0.162415	1.11916	0.377533	tr|B3DJI0|B3DJI0_DANRE Daam1l protein OS=Danio rerio OX=7955 GN=daam1b PE=1 SV=1	122686	12	daam1b
tr|Q7ZVG8|Q7ZVG8_DANRE	0.162393	1.11914	0.689656	tr|Q7ZVG8|Q7ZVG8_DANRE Serine/threonine kinase 25 (STE20 homolog, yeast) OS=Danio rerio OX=7955 GN=stk25b PE=2 SV=1	47978	4	stk25b
sp|Q58EK3|PLCX3_DANRE	0.162355	1.11911	0.565351	sp|Q58EK3|PLCX3_DANRE PI-PLC X domain-containing protein 3 OS=Danio rerio OX=7955 GN=plcxd3 PE=2 SV=1	36603	7	plcxd3
tr|Q568M0|Q568M0_DANRE	0.162125	1.11893	0.452083	tr|Q568M0|Q568M0_DANRE RAS-related 2 OS=Danio rerio OX=7955 GN=rras2 PE=1 SV=1	23261	7	rras2
tr|E7F238|E7F238_DANRE	0.161035	1.11809	0.822645	tr|E7F238|E7F238_DANRE Solute carrier family 25 member 10 OS=Danio rerio OX=7955 GN=slc25a10 PE=1 SV=3	31632	9	slc25a10
sp|Q7SXP0|S22BB_DANRE	0.16096	1.11803	0.447883	sp|Q7SXP0|S22BB_DANRE Vesicle-trafficking protein SEC22b-B OS=Danio rerio OX=7955 GN=sec22bb PE=2 SV=1	24689	1	sec22bb
tr|A0A286Y9W9|A0A286Y9W9_DANRE	0.160785	1.1179	0.282633	tr|A0A286Y9W9|A0A286Y9W9_DANRE Exocyst complex component 1 OS=Danio rerio OX=7955 GN=exoc1 PE=1 SV=2	102621	20	exoc1
tr|E7FDV3|E7FDV3_DANRE	0.160688	1.11782	0.519786	tr|E7FDV3|E7FDV3_DANRE Adenylate cyclase type 3 OS=Danio rerio OX=7955 GN=adcy3a PE=3 SV=3	126344	3	adcy3a
tr|Q9PVF8|Q9PVF8_DANRE	0.160602	1.11775	0.499548	tr|Q9PVF8|Q9PVF8_DANRE Catenin (Cadherin-associated protein), alpha OS=Danio rerio OX=7955 GN=ctnna1 PE=1 SV=1	100519	32	ctnna1
tr|F1QPV0|F1QPV0_DANRE	0.160217	1.11746	0.700247	tr|F1QPV0|F1QPV0_DANRE Solute carrier family 37 member 4b OS=Danio rerio OX=7955 GN=slc37a4b PE=3 SV=1	49471	4	slc37a4b
tr|Q4G5W7|Q4G5W7_DANRE	0.160216	1.11745	0.375707	tr|Q4G5W7|Q4G5W7_DANRE Reticulon OS=Danio rerio OX=7955 GN=rtn1b PE=2 SV=1	84200	5	rtn1b
tr|A0A2R8QKV7|A0A2R8QKV7_DANRE	0.160196	1.11744	0.748555	tr|A0A2R8QKV7|A0A2R8QKV7_DANRE TIAM Rac1-associated GEF 1b OS=Danio rerio OX=7955 GN=tiam1b PE=4 SV=1	172232	11	tiam1b
tr|Q0P3U1|Q0P3U1_DANRE	0.159932	1.11723	0.273034	tr|Q0P3U1|Q0P3U1_DANRE Dehydrogenase/reductase (SDR family) member 7 OS=Danio rerio OX=7955 GN=dhrs7 PE=2 SV=1	37011	4	dhrs7
tr|B7ZDE9|B7ZDE9_DANRE	0.159798	1.11713	0.227411	tr|B7ZDE9|B7ZDE9_DANRE Huntingtin OS=Danio rerio OX=7955 GN=htt PE=1 SV=1	346654	1	htt
tr|A0A286Y8Y0|A0A286Y8Y0_DANRE	0.159684	1.11704	0.36614	tr|A0A286Y8Y0|A0A286Y8Y0_DANRE Band 4.1 OS=Danio rerio OX=7955 GN=epb41a PE=1 SV=2	103546	20	epb41a
tr|B8A5J4|B8A5J4_DANRE	0.15965	1.11702	0.375643	tr|B8A5J4|B8A5J4_DANRE Protein-tyrosine-phosphatase OS=Danio rerio OX=7955 GN=ptprz1b PE=3 SV=1	145698	17	ptprz1b
tr|Q6IQG1|Q6IQG1_DANRE	0.159585	1.11697	0.560658	tr|Q6IQG1|Q6IQG1_DANRE Guanylate kinase OS=Danio rerio OX=7955 GN=guk1a PE=1 SV=1	21983	9	guk1a
tr|A0A0G2L009|A0A0G2L009_DANRE	0.159565	1.11695	0.532917	tr|A0A0G2L009|A0A0G2L009_DANRE Dynein, cytoplasmic 1, heavy chain 1 OS=Danio rerio OX=7955 GN=dync1h1 PE=1 SV=1	204017	1	dync1h1
tr|B0S5Q2|B0S5Q2_DANRE	0.159472	1.11688	0.619024	tr|B0S5Q2|B0S5Q2_DANRE Succinate dehydrogenase cytochrome b560 subunit, mitochondrial OS=Danio rerio OX=7955 GN=sdhc PE=1 SV=1	18770	4	sdhc
tr|E7FBD0|E7FBD0_DANRE	0.159444	1.11686	0.389204	tr|E7FBD0|E7FBD0_DANRE Neurofibromin 1a OS=Danio rerio OX=7955 GN=nf1a PE=1 SV=2	312817	29	nf1a
tr|B3DFS9|B3DFS9_DANRE	0.159434	1.11685	0.563235	tr|B3DFS9|B3DFS9_DANRE Myosin, heavy chain 11a, smooth muscle OS=Danio rerio OX=7955 GN=myh11a PE=1 SV=1	227742	36	myh11a
tr|A8E5B7|A8E5B7_DANRE	0.159427	1.11684	0.34739	tr|A8E5B7|A8E5B7_DANRE Complex I-SGDH OS=Danio rerio OX=7955 GN=ndufb5 PE=1 SV=1	21666	8	ndufb5
tr|B0S6Z1|B0S6Z1_DANRE	0.159226	1.11669	0.302282	tr|B0S6Z1|B0S6Z1_DANRE DEAH box protein 9 OS=Danio rerio OX=7955 GN=dhx9 PE=1 SV=1	140008	44	dhx9
tr|F1QTT3|F1QTT3_DANRE	0.159135	1.11662	0.289316	tr|F1QTT3|F1QTT3_DANRE Junction plakoglobin OS=Danio rerio OX=7955 GN=jupa PE=1 SV=1	80019	16	jupa
tr|A0A0R4IXT8|A0A0R4IXT8_DANRE	0.159091	1.11658	0.297652	tr|A0A0R4IXT8|A0A0R4IXT8_DANRE Brevican OS=Danio rerio OX=7955 GN=bcan PE=3 SV=1	143909	26	bcan
tr|A5PL68|A5PL68_DANRE	0.158766	1.11633	0.672879	tr|A5PL68|A5PL68_DANRE Sodium channel, voltage-gated, type IV, beta a OS=Danio rerio OX=7955 GN=scn4ba PE=2 SV=1	25420	2	scn4ba
tr|B2GTI4|B2GTI4_DANRE	0.158569	1.11618	0.64003	tr|B2GTI4|B2GTI4_DANRE Rhoae protein OS=Danio rerio OX=7955 GN=rhoca PE=2 SV=1	21958	1	rhoca
tr|Q1LYP4|Q1LYP4_DANRE	0.158402	1.11605	0.701576	tr|Q1LYP4|Q1LYP4_DANRE DNA helicase OS=Danio rerio OX=7955 GN=chd4a PE=1 SV=1	218976	9	chd4a
sp|Q6DRI1|EI3EA_DANRE	0.158189	1.11589	0.21539	sp|Q6DRI1|EI3EA_DANRE Eukaryotic translation initiation factor 3 subunit E-A OS=Danio rerio OX=7955 GN=eif3ea PE=2 SV=2	52389	9	eif3ea
tr|F1QAP6|F1QAP6_DANRE	0.157746	1.11554	0.477002	tr|F1QAP6|F1QAP6_DANRE Phosphoinositide phospholipase C OS=Danio rerio OX=7955 GN=plch2a PE=4 SV=3	170436	13	plch2a
sp|Q5TYQ3|COA7_DANRE	0.157713	1.11552	0.717168	sp|Q5TYQ3|COA7_DANRE Cytochrome c oxidase assembly factor 7 OS=Danio rerio OX=7955 GN=coa7 PE=2 SV=1	25522	5	coa7
tr|F8W4B7|F8W4B7_DANRE	0.157449	1.11531	0.517349	tr|F8W4B7|F8W4B7_DANRE Histone deacetylase 6 OS=Danio rerio OX=7955 GN=hdac6 PE=1 SV=1	118375	11	hdac6
tr|F1QI90|F1QI90_DANRE	0.1574	1.11528	0.448339	tr|F1QI90|F1QI90_DANRE E3 ubiquitin-protein ligase CBL OS=Danio rerio OX=7955 GN=cbl PE=4 SV=1	101164	8	cbl
tr|B8JKB8|B8JKB8_DANRE	0.157275	1.11518	0.332419	tr|B8JKB8|B8JKB8_DANRE Receptor protein-tyrosine kinase OS=Danio rerio OX=7955 GN=ephb3a PE=1 SV=1	101894	16	ephb3a
tr|Q8AWD9|Q8AWD9_DANRE	0.157231	1.11514	0.348568	tr|Q8AWD9|Q8AWD9_DANRE Cathepsin D OS=Danio rerio OX=7955 GN=ctsd PE=1 SV=1	43200	16	ctsd
tr|A0A286Y9W2|A0A286Y9W2_DANRE	0.157132	1.11507	0.479393	tr|A0A286Y9W2|A0A286Y9W2_DANRE HECT-type E3 ubiquitin transferase OS=Danio rerio OX=7955 GN=hecw2a PE=4 SV=1	165165	17	hecw2a
tr|Q7ZUI0|Q7ZUI0_DANRE	0.157098	1.11504	0.688738	tr|Q7ZUI0|Q7ZUI0_DANRE Ribosomal protein L5a OS=Danio rerio OX=7955 GN=rpl5a PE=1 SV=1	34084	3	rpl5a
tr|Q9DDT0|Q9DDT0_DANRE	0.156875	1.11487	0.754484	tr|Q9DDT0|Q9DDT0_DANRE Ferritin OS=Danio rerio OX=7955 GN=fth1a PE=1 SV=1	20719	8	fth1a
tr|A1A5X6|A1A5X6_DANRE	0.156743	1.11477	0.341862	tr|A1A5X6|A1A5X6_DANRE Phytanoyl-CoA 2-hydroxylase-interacting protein-like a OS=Danio rerio OX=7955 GN=phyhipla PE=2 SV=1	42127	10	phyhipla
tr|F8W3W2|F8W3W2_DANRE	0.156694	1.11473	0.376512	tr|F8W3W2|F8W3W2_DANRE Chondroitin sulfate proteoglycan 5a OS=Danio rerio OX=7955 GN=cspg5a PE=1 SV=1	59335	4	cspg5a
tr|Q567B0|Q567B0_DANRE	0.156571	1.11464	0.443511	tr|Q567B0|Q567B0_DANRE Zgc:112183 OS=Danio rerio OX=7955 GN=zgc:112183 PE=2 SV=1	26009	5	zgc:112183
tr|F1R3X2|F1R3X2_DANRE	0.156504	1.11458	0.663082	tr|F1R3X2|F1R3X2_DANRE Malignant T-cell-amplified sequence OS=Danio rerio OX=7955 GN=mcts1 PE=1 SV=1	20606	9	mcts1
tr|Q6DHK5|Q6DHK5_DANRE	0.15632	1.11444	0.455297	tr|Q6DHK5|Q6DHK5_DANRE Glutathione S-transferase omega OS=Danio rerio OX=7955 GN=gsto1 PE=2 SV=1	28027	15	gsto1
sp|Q7ZUH1|RTRAF_DANRE	0.15626	1.11439	0.237107	sp|Q7ZUH1|RTRAF_DANRE RNA transcription, translation and transport factor protein OS=Danio rerio OX=7955 GN=rtraf PE=2 SV=1	27858	13	rtraf
tr|Q7ZW29|Q7ZW29_DANRE	0.156131	1.11429	0.62452	tr|Q7ZW29|Q7ZW29_DANRE Histone acetyltransferase OS=Danio rerio OX=7955 GN=kat7b PE=1 SV=1	65579	1	kat7b
tr|F1R2V6|F1R2V6_DANRE	0.156025	1.11421	0.330522	tr|F1R2V6|F1R2V6_DANRE Microtubule-associated protein (Fragment) OS=Danio rerio OX=7955 GN=map2 PE=1 SV=1	64594	18	map2
tr|B0UYD6|B0UYD6_DANRE	0.155994	1.11419	0.275828	tr|B0UYD6|B0UYD6_DANRE Glutaminyl-tRNA synthetase OS=Danio rerio OX=7955 GN=qars1 PE=1 SV=1	87838	25	qars1
sp|Q6PBX9|REEP5_DANRE	0.155945	1.11415	0.537664	sp|Q6PBX9|REEP5_DANRE Receptor expression-enhancing protein 5 OS=Danio rerio OX=7955 GN=reep5 PE=1 SV=1	21407	9	reep5
tr|A0A2R8QSI8|A0A2R8QSI8_DANRE	0.155694	1.11396	0.823136	tr|A0A2R8QSI8|A0A2R8QSI8_DANRE Carboxylic ester hydrolase OS=Danio rerio OX=7955 GN=ces3 PE=1 SV=1	59432	2	ces3
tr|Q6DHJ2|Q6DHJ2_DANRE	0.15553	1.11383	0.570646	tr|Q6DHJ2|Q6DHJ2_DANRE Ras-related protein Rab-3 OS=Danio rerio OX=7955 GN=rab3aa PE=1 SV=1	25104	7	rab3aa
tr|B8JIS1|B8JIS1_DANRE	0.155506	1.11381	0.302103	tr|B8JIS1|B8JIS1_DANRE ATP synthase subunit b OS=Danio rerio OX=7955 GN=atp5pb PE=1 SV=1	28170	23	atp5pb
tr|Q6DGK1|Q6DGK1_DANRE	0.155242	1.11361	0.529594	tr|Q6DGK1|Q6DGK1_DANRE ADP-ribosylation factor-like 1 OS=Danio rerio OX=7955 GN=arl1 PE=1 SV=1	20323	6	arl1
tr|A0A2R8Q4R9|A0A2R8Q4R9_DANRE	0.155213	1.11359	0.625045	tr|A0A2R8Q4R9|A0A2R8Q4R9_DANRE HECT-type E3 ubiquitin transferase OS=Danio rerio OX=7955 GN=hecw1b PE=4 SV=1	134273	1	hecw1b
sp|Q7T3C6|CPSF5_DANRE	0.155162	1.11355	0.394727	sp|Q7T3C6|CPSF5_DANRE Cleavage and polyadenylation specificity factor subunit 5 OS=Danio rerio OX=7955 GN=nudt21 PE=2 SV=1	26272	9	nudt21
tr|A1L1U3|A1L1U3_DANRE	0.15502	1.11344	0.37074	tr|A1L1U3|A1L1U3_DANRE GTPase activating protein (SH3 domain) binding protein 2 OS=Danio rerio OX=7955 GN=g3bp2a PE=1 SV=1	56463	9	g3bp2a
tr|A0A0R4IWV5|A0A0R4IWV5_DANRE	0.154979	1.11341	0.64895	tr|A0A0R4IWV5|A0A0R4IWV5_DANRE Transmembrane p24-trafficking protein 5 OS=Danio rerio OX=7955 GN=tmed5 PE=3 SV=2	25754	3	tmed5
tr|A0A0R4IVS6|A0A0R4IVS6_DANRE	0.154882	1.11333	0.343103	tr|A0A0R4IVS6|A0A0R4IVS6_DANRE Glutamate receptor-interacting protein 1 OS=Danio rerio OX=7955 GN=grip1 PE=4 SV=2	125737	12	grip1
tr|A0A2R8QK78|A0A2R8QK78_DANRE	0.154816	1.11328	0.513991	tr|A0A2R8QK78|A0A2R8QK78_DANRE Versican b OS=Danio rerio OX=7955 GN=vcanb PE=1 SV=1	172674	11	vcanb
tr|Q804C3|Q804C3_DANRE	0.154652	1.11315	0.211371	tr|Q804C3|Q804C3_DANRE Acetyltransferase component of pyruvate dehydrogenase complex OS=Danio rerio OX=7955 GN=dlat PE=2 SV=1	69268	1	dlat
tr|E7FF92|E7FF92_DANRE	0.154377	1.11294	0.343573	tr|E7FF92|E7FF92_DANRE Synaptotagmin OS=Danio rerio OX=7955 PE=1 SV=2	29186	9	Uncharacterized protein
tr|A0A0R4ITD9|A0A0R4ITD9_DANRE	0.154357	1.11293	0.299723	tr|A0A0R4ITD9|A0A0R4ITD9_DANRE Protocadherin 11 OS=Danio rerio OX=7955 GN=pcdh11 PE=4 SV=2	120844	15	pcdh11
tr|Q5XJQ1|Q5XJQ1_DANRE	0.154315	1.11289	0.716554	tr|Q5XJQ1|Q5XJQ1_DANRE Thiamine pyrophosphokinase OS=Danio rerio OX=7955 GN=tpk1 PE=2 SV=1	28859	1	tpk1
tr|E7EZJ2|E7EZJ2_DANRE	0.154145	1.11276	0.443717	tr|E7EZJ2|E7EZJ2_DANRE Zmp:0000000846 OS=Danio rerio OX=7955 GN=zmp:0000000846 PE=3 SV=3	166758	13	zmp:0000000846
tr|B1B5D9|B1B5D9_DANRE	0.154087	1.11272	0.777907	tr|B1B5D9|B1B5D9_DANRE Sphingomyelin phosphodiesterase OS=Danio rerio OX=7955 GN=smpd3 PE=2 SV=1	76013	6	smpd3
tr|Q6IQV0|Q6IQV0_DANRE	0.15386	1.11254	0.7381	tr|Q6IQV0|Q6IQV0_DANRE Non-specific serine/threonine protein kinase OS=Danio rerio OX=7955 GN=zgc:86598 PE=1 SV=1	45441	2	zgc:86598
tr|Q1JPX8|Q1JPX8_DANRE	0.153711	1.11243	0.793849	tr|Q1JPX8|Q1JPX8_DANRE Aldh2b protein OS=Danio rerio OX=7955 GN=aldh2.2 PE=2 SV=1	56459	1	aldh2.2
tr|E7F582|E7F582_DANRE	0.153562	1.11231	0.645907	tr|E7F582|E7F582_DANRE Uncharacterized protein OS=Danio rerio OX=7955 PE=4 SV=3	30676	3	Uncharacterized protein
tr|F1QJX3|F1QJX3_DANRE	0.152957	1.11185	0.784322	tr|F1QJX3|F1QJX3_DANRE WW domain-binding protein 2 OS=Danio rerio OX=7955 GN=wbp2 PE=4 SV=1	28219	4	wbp2
tr|E7F7X1|E7F7X1_DANRE	0.152939	1.11183	0.75345	tr|E7F7X1|E7F7X1_DANRE MAGUK p55 scaffold protein 3b OS=Danio rerio OX=7955 GN=mpp3b PE=3 SV=1	66971	7	mpp3b
tr|E9QIC8|E9QIC8_DANRE	0.152664	1.11162	0.513436	tr|E9QIC8|E9QIC8_DANRE FERM, RhoGEF (ARHGEF) and pleckstrin domain protein 1 (chondrocyte-derived) OS=Danio rerio OX=7955 GN=farp1 PE=1 SV=1	117236	8	farp1
tr|A0A0R4IGD3|A0A0R4IGD3_DANRE	0.152617	1.11158	0.539409	tr|A0A0R4IGD3|A0A0R4IGD3_DANRE Endophilin-3-interacting protein OS=Danio rerio OX=7955 GN=sgip1a PE=4 SV=2	81673	1	sgip1a
sp|A2CEA7|RGRF2_DANRE	0.152281	1.11132	0.783275	sp|A2CEA7|RGRF2_DANRE Ras-specific guanine nucleotide-releasing factor 2 OS=Danio rerio OX=7955 GN=rasgrf2 PE=3 SV=1	141587	9	rasgrf2
tr|Q5U3X0|Q5U3X0_DANRE	0.152279	1.11132	0.664631	tr|Q5U3X0|Q5U3X0_DANRE Zgc:101525 OS=Danio rerio OX=7955 GN=slc35g2a PE=2 SV=1	32719	2	slc35g2a
tr|Q7ZUQ0|Q7ZUQ0_DANRE	0.152005	1.11111	0.347253	tr|Q7ZUQ0|Q7ZUQ0_DANRE Actin-related protein 2/3 complex subunit OS=Danio rerio OX=7955 GN=arpc1a PE=1 SV=1	41574	17	arpc1a
tr|Q5U3D8|Q5U3D8_DANRE	0.151902	1.11103	0.493399	tr|Q5U3D8|Q5U3D8_DANRE Ahsg protein OS=Danio rerio OX=7955 GN=ahsg1 PE=2 SV=1	50799	10	ahsg1
tr|Q7ZVD4|Q7ZVD4_DANRE	0.151826	1.11098	0.485882	tr|Q7ZVD4|Q7ZVD4_DANRE Sf3a2 protein OS=Danio rerio OX=7955 GN=sf3a2 PE=1 SV=1	31347	5	sf3a2
sp|Q1JPY5|CYP51_DANRE	0.151807	1.11096	0.514221	sp|Q1JPY5|CYP51_DANRE Lanosterol 14-alpha demethylase OS=Danio rerio OX=7955 GN=cyp51 PE=1 SV=1	57001	15	cyp51
tr|F1R882|F1R882_DANRE	0.151799	1.11095	0.517094	tr|F1R882|F1R882_DANRE Uncharacterized protein OS=Danio rerio OX=7955 PE=4 SV=3	62991	9	Uncharacterized protein
tr|A0A0R4IGN3|A0A0R4IGN3_DANRE	0.151789	1.11095	0.309176	tr|A0A0R4IGN3|A0A0R4IGN3_DANRE Protein disulfide-isomerase (Fragment) OS=Danio rerio OX=7955 GN=pdia3 PE=1 SV=1	51136	31	pdia3
tr|A1A5H9|A1A5H9_DANRE	0.151593	1.1108	0.272065	tr|A1A5H9|A1A5H9_DANRE RAB39B, member RAS oncogene family OS=Danio rerio OX=7955 GN=rab39bb PE=2 SV=1	24490	2	rab39bb
tr|A0A2R8QNK6|A0A2R8QNK6_DANRE	0.15151	1.11073	0.403662	tr|A0A2R8QNK6|A0A2R8QNK6_DANRE Protocadherin b OS=Danio rerio OX=7955 GN=pcdhb PE=4 SV=1	88225	1	pcdhb
sp|Q5TZ07|PLPP6_DANRE	0.151507	1.11073	0.289582	sp|Q5TZ07|PLPP6_DANRE Polyisoprenoid diphosphate/phosphate phosphohydrolase PLPP6 OS=Danio rerio OX=7955 GN=plpp6 PE=2 SV=1	31284	3	plpp6
sp|B0R0T1|VWA8_DANRE	0.151271	1.11055	0.485829	sp|B0R0T1|VWA8_DANRE von Willebrand factor A domain-containing protein 8 OS=Danio rerio OX=7955 GN=si:dkey-18l1.1 PE=3 SV=1	211974	1	si:dkey-18l1.1
tr|A0A0S3NTN0|A0A0S3NTN0_DANRE	0.15076	1.11015	0.449714	tr|A0A0S3NTN0|A0A0S3NTN0_DANRE Amphiphysin1a OS=Danio rerio OX=7955 GN=amph PE=2 SV=1	85747	28	amph
tr|F1QA41|F1QA41_DANRE	0.150648	1.11007	0.483507	tr|F1QA41|F1QA41_DANRE Mitochondrial ribosomal protein L38 OS=Danio rerio OX=7955 GN=mrpl38 PE=1 SV=1	40648	5	mrpl38
tr|A0A0R4IEP9|A0A0R4IEP9_DANRE	0.150631	1.11005	0.560122	tr|A0A0R4IEP9|A0A0R4IEP9_DANRE TRAF2 and NCK-interacting kinase a OS=Danio rerio OX=7955 GN=tnika PE=1 SV=1	151393	12	tnika
sp|Q7SXI6|NDL1A_DANRE	0.150627	1.11005	0.727826	sp|Q7SXI6|NDL1A_DANRE Nuclear distribution protein nudE-like 1-A OS=Danio rerio OX=7955 GN=ndel1a PE=2 SV=1	38629	4	ndel1a
tr|Q6PC06|Q6PC06_DANRE	0.150536	1.10998	0.183508	tr|Q6PC06|Q6PC06_DANRE Adenosylhomocysteinase-like 2b OS=Danio rerio OX=7955 GN=ahcyl2b PE=1 SV=1	65087	17	ahcyl2b
tr|Q6PFI6|Q6PFI6_DANRE	0.15036	1.10985	0.345321	tr|Q6PFI6|Q6PFI6_DANRE Ataxin 2-like OS=Danio rerio OX=7955 GN=atxn2l PE=2 SV=1	104473	12	atxn2l
tr|A0A2R8Q9U1|A0A2R8Q9U1_DANRE	0.150245	1.10976	0.581534	tr|A0A2R8Q9U1|A0A2R8Q9U1_DANRE ADAM metallopeptidase domain 23a OS=Danio rerio OX=7955 GN=adam23a PE=4 SV=1	78361	7	adam23a
tr|B3DGN6|B3DGN6_DANRE	0.150229	1.10975	0.520058	tr|B3DGN6|B3DGN6_DANRE Pcdh1g9 protein OS=Danio rerio OX=7955 GN=pcdh1g9 PE=2 SV=1	97780	4	pcdh1g9
tr|A0A0R4II97|A0A0R4II97_DANRE	0.150143	1.10968	0.538665	tr|A0A0R4II97|A0A0R4II97_DANRE Stathmin OS=Danio rerio OX=7955 GN=stmn1a PE=1 SV=1	18518	5	stmn1a
tr|A0A2R8PZ07|A0A2R8PZ07_DANRE	0.150105	1.10965	0.479867	tr|A0A2R8PZ07|A0A2R8PZ07_DANRE Coronin OS=Danio rerio OX=7955 GN=coro2ba PE=3 SV=1	55918	13	coro2ba
tr|F8W2U7|F8W2U7_DANRE	0.14985	1.10945	0.337092	tr|F8W2U7|F8W2U7_DANRE Phosphorylase b kinase regulatory subunit OS=Danio rerio OX=7955 GN=phkb PE=1 SV=2	124025	14	phkb
tr|F1Q6S4|F1Q6S4_DANRE	0.14958	1.10925	0.228983	tr|F1Q6S4|F1Q6S4_DANRE Alpha/beta hydrolase domain-containing protein 16A OS=Danio rerio OX=7955 GN=abhd16a PE=1 SV=1	61644	22	abhd16a
tr|Q7ZUV5|Q7ZUV5_DANRE	0.149429	1.10913	0.318499	tr|Q7ZUV5|Q7ZUV5_DANRE ZRAB1B, member RAS oncogene family a OS=Danio rerio OX=7955 GN=rab1ba PE=1 SV=1	22384	3	rab1ba
tr|E9QIF0|E9QIF0_DANRE	0.149377	1.10909	0.406482	tr|E9QIF0|E9QIF0_DANRE Microtubule-associated protein RP/EB family member 1 (Fragment) OS=Danio rerio OX=7955 GN=mapre1b PE=1 SV=1	29239	1	mapre1b
tr|A0A2R8QMZ2|A0A2R8QMZ2_DANRE	0.149279	1.10902	0.430748	tr|A0A2R8QMZ2|A0A2R8QMZ2_DANRE Peroxisomal membrane protein PEX14 OS=Danio rerio OX=7955 GN=pex14 PE=1 SV=1	41425	3	pex14
tr|Q1LVS7|Q1LVS7_DANRE	0.149095	1.10887	0.656989	tr|Q1LVS7|Q1LVS7_DANRE Si:dkeyp-27e10.3 OS=Danio rerio OX=7955 GN=si:dkeyp-27e10.3 PE=4 SV=2	157603	13	si:dkeyp-27e10.3
tr|Q6TH14|Q6TH14_DANRE	0.148884	1.10871	0.308251	tr|Q6TH14|Q6TH14_DANRE 2-phospho-D-glycerate hydro-lyase OS=Danio rerio OX=7955 GN=eno3 PE=1 SV=1	47472	15	eno3
tr|Q6PH46|Q6PH46_DANRE	0.148442	1.10837	0.257786	tr|Q6PH46|Q6PH46_DANRE T-complex protein 1 subunit delta OS=Danio rerio OX=7955 GN=cct4 PE=1 SV=1	56973	30	cct4
tr|A0A2R8Q7K0|A0A2R8Q7K0_DANRE	0.148389	1.10833	0.494058	tr|A0A2R8Q7K0|A0A2R8Q7K0_DANRE Histone acetyltransferase OS=Danio rerio OX=7955 PE=3 SV=1	57476	1	Uncharacterized protein
tr|Q7T314|Q7T314_DANRE	0.147861	1.10793	0.540118	tr|Q7T314|Q7T314_DANRE translocase of Outer mitochondrial membrane 40 homolog (Yeast) OS=Danio rerio OX=7955 GN=tomm40 PE=1 SV=1	36209	5	tomm40
tr|Q6NZV1|Q6NZV1_DANRE	0.14777	1.10786	0.495653	tr|Q6NZV1|Q6NZV1_DANRE 3-phosphoinositide-dependent protein kinase 1 OS=Danio rerio OX=7955 GN=pdpk1b PE=1 SV=1	61490	18	pdpk1b
sp|Q6AXL4|NCLDB_DANRE	0.147746	1.10784	0.502845	sp|Q6AXL4|NCLDB_DANRE Neurocalcin-delta B OS=Danio rerio OX=7955 GN=ncaldb PE=2 SV=1	21984	2	ncaldb
tr|F1RBK4|F1RBK4_DANRE	0.147578	1.10771	0.261008	tr|F1RBK4|F1RBK4_DANRE Catenin (cadherin-associated protein), delta 2b OS=Danio rerio OX=7955 GN=ctnnd2b PE=1 SV=3	132518	24	ctnnd2b
tr|F1QVG9|F1QVG9_DANRE	0.146931	1.10721	0.566555	tr|F1QVG9|F1QVG9_DANRE Vacuolar protein sorting-associated protein 11 homolog OS=Danio rerio OX=7955 GN=vps11 PE=1 SV=1	106623	18	vps11
tr|A0A0R4ISJ1|A0A0R4ISJ1_DANRE	0.14686	1.10716	0.680479	tr|A0A0R4ISJ1|A0A0R4ISJ1_DANRE Claudin domain-containing 1a OS=Danio rerio OX=7955 GN=cldnd1a PE=4 SV=1	27876	1	cldnd1a
tr|Q7ZVF2|Q7ZVF2_DANRE	0.146855	1.10715	0.570039	tr|Q7ZVF2|Q7ZVF2_DANRE Glutamine synthetase OS=Danio rerio OX=7955 GN=glulb PE=1 SV=1	41909	14	glulb
tr|Q5BJC7|Q5BJC7_DANRE	0.146778	1.10709	0.737463	tr|Q5BJC7|Q5BJC7_DANRE Si:xx-by187g17.5 OS=Danio rerio OX=7955 GN=hbaa2 PE=2 SV=1	15403	1	hbaa2
tr|F1R374|F1R374_DANRE	0.146513	1.10689	0.431758	tr|F1R374|F1R374_DANRE 6-phosphofructo-2-kinase/fructose-2,6-biphosphatase 2a OS=Danio rerio OX=7955 GN=pfkfb2a PE=1 SV=1	60196	6	pfkfb2a
tr|A0A2R8RIM0|A0A2R8RIM0_DANRE	0.146072	1.10655	0.383709	tr|A0A2R8RIM0|A0A2R8RIM0_DANRE Stromal interaction molecule 1a OS=Danio rerio OX=7955 GN=stim1a PE=1 SV=1	79296	16	stim1a
tr|Q6NV35|Q6NV35_DANRE	0.145981	1.10648	0.265552	tr|Q6NV35|Q6NV35_DANRE Glutamate--cysteine ligase OS=Danio rerio OX=7955 GN=gclc PE=1 SV=1	72416	27	gclc
tr|Q6IQI6|Q6IQI6_DANRE	0.145578	1.10617	0.274588	tr|Q6IQI6|Q6IQI6_DANRE 60S ribosomal protein L11 OS=Danio rerio OX=7955 GN=rpl11 PE=1 SV=1	20377	6	rpl11
tr|B8JM36|B8JM36_DANRE	0.145329	1.10598	0.635159	tr|B8JM36|B8JM36_DANRE 39S ribosomal protein L16, mitochondrial OS=Danio rerio OX=7955 GN=mrpl16 PE=1 SV=1	28870	1	mrpl16
tr|A0A140LGD0|A0A140LGD0_DANRE	0.145036	1.10576	0.734189	tr|A0A140LGD0|A0A140LGD0_DANRE Sprouty-related EVH1 domain-containing 3 OS=Danio rerio OX=7955 GN=spred3 PE=4 SV=1	54448	2	spred3
tr|E7F7J1|E7F7J1_DANRE	0.145026	1.10575	0.424102	tr|E7F7J1|E7F7J1_DANRE Ferredoxin 1 OS=Danio rerio OX=7955 GN=fdx1 PE=1 SV=1	19302	5	fdx1
tr|A0A2R8PYB9|A0A2R8PYB9_DANRE	0.14484	1.10561	0.376822	tr|A0A2R8PYB9|A0A2R8PYB9_DANRE Anion exchange protein OS=Danio rerio OX=7955 GN=slc4a4a PE=1 SV=1	124907	31	slc4a4a
tr|F1QCC9|F1QCC9_DANRE	0.144789	1.10557	0.634978	tr|F1QCC9|F1QCC9_DANRE Synaptotagmin Vb OS=Danio rerio OX=7955 GN=syt5b PE=4 SV=1	50912	6	syt5b
tr|Q5KTT7|Q5KTT7_DANRE	0.144743	1.10553	0.765861	tr|Q5KTT7|Q5KTT7_DANRE eIF4G-related protein NAT1A OS=Danio rerio OX=7955 GN=eif4g2a PE=2 SV=1	101231	6	eif4g2a
sp|Q08BB1|EFGM_DANRE	0.144471	1.10532	0.503785	sp|Q08BB1|EFGM_DANRE Elongation factor G, mitochondrial OS=Danio rerio OX=7955 GN=gfm1 PE=2 SV=1	82749	16	gfm1
tr|Q5TZ73|Q5TZ73_DANRE	0.144124	1.10506	0.779498	tr|Q5TZ73|Q5TZ73_DANRE Mitochondrial ribosomal protein L19 OS=Danio rerio OX=7955 GN=mrpl19 PE=1 SV=1	33052	6	mrpl19
tr|A0JMN9|A0JMN9_DANRE	0.143761	1.10478	0.665654	tr|A0JMN9|A0JMN9_DANRE Zgc:154077 OS=Danio rerio OX=7955 GN=zgc:154077 PE=1 SV=1	63353	5	zgc:154077
tr|A0A2R8QIK1|A0A2R8QIK1_DANRE	0.143677	1.10472	0.670835	tr|A0A2R8QIK1|A0A2R8QIK1_DANRE Furry homolog b (Drosophila) OS=Danio rerio OX=7955 GN=fryb PE=4 SV=1	21733	1	fryb
[truncated: 3,708 more rows]
